# Supplementary material for: Evolving biological anthropology in twelve acts
Source: Oxford University Press journal article supplement (doi:10.1158/0008-5472.can-17-2511), 2013-01-01
Supplement: 00085472can172511-sup-188043_2_supp_4542514_p3qyk1.xlsx [file 00085472can172511-sup-188043_2_supp_4542514_p3qyk1.xlsx]

## Sheet: Suppl Table 1 Antibodies
Supplemental Table 1
	Protein	Antibody
	BIM	CST-2819
	BMF (mouse)	ENZO-17A9
	BMF (human)	CST-4692
	PKB	5178 (Burgering et al 1995)
	FOXO1	CST-29H4
	FOXO3 Western Blot	SC-H144
	FOXO3 Immunofluorescence	CST-2497
	BCL2	CST-2876
	BCL-XL	CST-2764
	PKB-S308	CST-2965
	PKB-S473	CST-4060
	JNK	SC-1648
	pJNK	CST-4668
	cJUN	SC-1694
	pcJUN-S73	CST-9164
	p38	CST-2387
	pp38-S180/183	CST-9211
	IRS1	CST-2390
	IRS2	CST-4502
	cMET	CST-3127
	ERBB2	CST-2165
	ERBB3	CST-12708
	INSR	CST-3025
	IGF-1R	CST-9750
	PDGFRA	CST-3174
	RICTOR	CST-2140
	p27	BD-610241
	p21	SC-471
	SOD2	ADI-SOD-110
	Catalase	BML-SA115

## Sheet: Suppl Table 2 Primer pairs
Supplemental Table 2: Sequences of all oligos used in this study
Target gene	primer	sequence 5'-3'
Pbgd	Forward	GCCTACCATACTACCTCCTGGCT
	Reverse	AAGACAACAGCATCACAAGGGTT
Noxa	Forward	ATAACTGTGGTTCTGGCGCA
	Reverse	TCCTTCAAGTCTGCTGGCAC
Puma	Forward	TACGAGCGGCGGAGACAAG
	Reverse	GTGTAGGCACCTAGTTGGGC
Bim	Forward	CGGTCCTCCAGTGGGTATTT
	Reverse	GTCGTATGGAAGCCATTGCAC
Bmf	Forward	GCAGCCCGCTGGAGTT
	Reverse	CAGGGTCCAGGGTGAAGAAC
Bid	Forward	GGACTCTGAGGTCAGCAACG
	Reverse	CCTCCCAGTAAGCTTGCACA
Bcl2	Forward	GCGTCAACAGGGAGATGTCA
	Reverse	TTCCACAAAGGCATCCCAGC
Bcl-xl	Forward	CCGGTCTCTTCAGGGGAAAC
	Reverse	TAAGGTTCTGGCTGACTGCTC
Mcl1	Forward	CAAAGAGGCTGGGATGGGTT
	Reverse	CAGCACATTTCTGATGCCGC
Gapdh	Forward	GAGAAACCTGCCAAGTATGA
	Reverse	CTCAGTGTAGCCCAAGATG
Hnrnpa1	Forward	TGACAGCTATAACAACGGAG
	Reverse	AAAGTTTCCTCCCTTCATCG
Egfr	Forward	CGCCAACTGTACCTATGGATGT
	Reverse	GGGCCACCACCACTATGAAG
cMet	Forward	CCAGCCCCTCTGCTTTCTTT
	Reverse	CTCTCCACAGCCATCCTCG
Igf-1r	Forward	CACAACTACTGCTCCAAAGACAA
	Reverse	GGCCCTTTATCACCACCACA
Insr	Forward	CCAAAATTATCATTGGACCCC
	Reverse	GAGGTACTCAGGGTTTGAAG
Irs1	Forward	GAAAAGCCACTTTCCCCGCC
	Reverse	TACCAGCTCAATCGCAGAGAC
Irs2	Forward	CACAATTCCAAGCGCCACAA
	Reverse	CATCACCTCCTCCCAGGGTA
Rictor	Forward	AGATGTGCTTTTTACCGACA
	Reverse	AGCTTTCATAAACCTGCTTG
Fgfr1	Forward	GGCAGCGATACCACCTACTT
	Reverse	GTAGGGAGCTACAGGGTTTGG

## Sheet: Suppl Table 3 Micro array data
Supplemental Table 3, Microarray data
bioSeqDescription	geneSymbol	mILC1-iFOXO3.A3 8hr dox		mILC1-iFOXO3.A3 16hr dox		mILC1-shFOXOs 48hr dox		mILC1-shFOXOs 72hr dox
		M	p_value	M	p_value	M	p_value	M	p_value
aquaporin 1 [Source:MGI Symbol;Acc:MGI:103201]	Aqp1	-0.395969	0.0003	-0.49012	0.5656	-1.4291	0	-3.06225	0
tetraspanin 1 [Source:MGI Symbol;Acc:MGI:1914055]	Tspan1	0.0772977	1	1.04888	0	-0.737139	0.0072	-2.63687	0
lymphocyte antigen 6 complex, locus C1 [Source:MGI Symbol;Acc:MGI:96882]	Ly6c1	0.837984	0	1.5968	0	-1.05532	0	-2.54712	0
inositol monophosphatase domain containing 1 [Source:MGI Symbol;Acc:MGI:1915720]	Impad1	-0.0847269	1	-0.212235	0.9663	-2.34884	0	-2.32925	0
lymphocyte antigen 6 complex, locus C2 [Source:MGI Symbol;Acc:MGI:3712069]	Ly6c2	0.503257	0.0001	1.31627	0	-1.07632	0	-2.2883	0
inhibitor of DNA binding 2 [Source:MGI Symbol;Acc:MGI:96397]	Id2	-2.56659	0	-2.57494	0	-2.1836	0	-2.27559	0
lymphocyte antigen 6 complex, locus A [Source:MGI Symbol;Acc:MGI:107527]	Ly6a	0.390172	0.2461	1.259	0	-1.15051	0	-2.24116	0
trichorhinophalangeal syndrome I (human) [Source:MGI Symbol;Acc:MGI:1927616]	Trps1	0.858459	0	0.889949	0	-1.62492	0	-2.17338	0
RIKEN cDNA 1700016C15 gene [Source:MGI Symbol;Acc:MGI:1916678]	1700016C15Rik	-0.35689	0.8549	-1.40778	0	-1.17258	0	-2.15449	0
cytochrome c, somatic [Source:MGI Symbol;Acc:MGI:88578]	Cycs	-0.3717	0.1658	-1.07291	0	-2.41955	0	-2.14165	0
family with sequence similarity 162, member A [Source:MGI Symbol;Acc:MGI:1917436]	Fam162a	0.0927081	1	-0.378054	0.0002	-1.41913	0	-2.11377	0
cytochrome c, somatic [Source:MGI Symbol;Acc:MGI:88578]	Cycs	-0.367246	0.0956	-1.08951	0	-2.38959	0	-2.09483	0
insulin-like growth factor binding protein 4 [Source:MGI Symbol;Acc:MGI:96439]	Igfbp4	-0.0699758	1	-0.886238	0	-1.29737	0	-2.07784	0
leucine rich repeat containing 58 [Source:MGI Symbol;Acc:MGI:2443542]	Lrrc58	0.0587044	1	-0.091885	1	-2.09361	0	-2.04852	0
MARCKS-like 1 [Source:MGI Symbol;Acc:MGI:97143]	Marcksl1	-1.05397	0	-0.930576	0	-1.83307	0	-2.02481	0
MARCKS-like 1 [Source:MGI Symbol;Acc:MGI:97143]	Marcksl1	-0.778898	0	-0.726761	0	-1.14435	0	-2.01849	0.9997
lysophosphatidylglycerol acyltransferase 1 [Source:MGI Symbol;Acc:MGI:2446186]	Lpgat1	-0.890543	0	-0.531629	0	-2.07802	0	-2.00959	0
actin filament associated protein 1-like 2 [Source:MGI Symbol;Acc:MGI:2147658]	Afap1l2	1.60166	0	2.17142	0	-1.47425	0	-2.00242	0
transmembrane protein 50B [Source:MGI Symbol;Acc:MGI:1925225]	Tmem50b	0.332164	0.6104	1.01328	0	-2.26196	0	-1.96849	0
pyruvate dehydrogenase kinase, isoenzyme 1 [Source:MGI Symbol;Acc:MGI:1926119]	Pdk1	-0.782682	0.0012	-1.00495	0	-1.31484	0	-1.92944	0
inhibitor of DNA binding 2 [Source:MGI Symbol;Acc:MGI:96397]	Id2	-2.30533	0	-2.13722	0	-1.5308	0	-1.87953	0
CDC28 protein kinase 1b [Source:MGI Symbol;Acc:MGI:1889208]	Cks1b	-0.587043	0	-3.0539	0	-2.29688	0	-1.87413	0
lymphocyte antigen 6 complex, locus F [Source:MGI Symbol;Acc:MGI:109441]	Ly6f	0.448975	0	1.03785	0	-0.89849	0	-1.86265	0
vesicle-associated membrane protein 3 [Source:MGI Symbol;Acc:MGI:1321389]	Vamp3	0.12132	1	0.0317904	1	-1.8739	0	-1.86002	0
inositol monophosphatase domain containing 1 [Source:MGI Symbol;Acc:MGI:1915720]	Impad1	-0.0161122	1	-0.228114	1	-1.96061	0	-1.85586	0
xenotropic and polytropic retrovirus receptor 1 [Source:MGI Symbol;Acc:MGI:97932]	Xpr1	0.644733	0	0.409842	0.0002	-1.5986	0	-1.83727	0
secreted phosphoprotein 1 [Source:MGI Symbol;Acc:MGI:98389]	Spp1	-0.0718958	1	-1.5715	0	-1.23617	0	-1.82334	0
thymoma viral proto-oncogene 3 [Source:MGI Symbol;Acc:MGI:1345147]	Akt3	0.831058	0	0.59452	0	-1.54965	0	-1.80659	0
sorting nexin 7 [Source:MGI Symbol;Acc:MGI:1923811]	Snx7	-0.84812	0	-1.89169	0	-2.00274	0	-1.7943	0
zinc finger matrin type 3 [Source:MGI Symbol;Acc:MGI:1195270]	Zmat3	-0.13201	1	0.209977	0.9991	-1.94643	0	-1.79194	0
predicted gene 12111 [Source:MGI Symbol;Acc:MGI:3649341]	Gm12111	-0.0425073	1	-0.743364	0	-1.81032	0	-1.78986	0
autocrine motility factor receptor [Source:MGI Symbol;Acc:MGI:1345634]	Amfr	-0.0464323	1	0.0341171	1	-2.0611	0	-1.78726	0
lymphocyte antigen 6 complex, locus I [Source:MGI Symbol;Acc:MGI:1888480]	Ly6i	0.610766	0	1.09733	0	-0.6824	0	-1.78344	0
DnaJ (Hsp40) homolog, subfamily B, member 11 [Source:MGI Symbol;Acc:MGI:1915088]	Dnajb11	-0.451733	0.0072	-0.72168	0	-1.91374	0	-1.7393	0
transcription elongation factor A (SII) 1 [Source:MGI Symbol;Acc:MGI:1196624]	Tcea1	-0.0817909	1	-0.757796	0	-1.63298	0	-1.69641	0
receptor (calcitonin) activity modifying protein 1 [Source:MGI Symbol;Acc:MGI:1858418]	Ramp1	-0.231828	1	-0.277057	0.7052	-0.690968	0	-1.69124	0
neuroblastoma ras oncogene [Source:MGI Symbol;Acc:MGI:97376]	Nras	-0.124212	1	-0.711025	0	-1.66783	0	-1.67193	0
insulin-like growth factor binding protein 4 [Source:MGI Symbol;Acc:MGI:96439]	Igfbp4	-0.147968	1	-0.850389	0	-1.00693	0	-1.63114	0
aspartate-beta-hydroxylase [Source:MGI Symbol;Acc:MGI:1914186]	Asph	-0.751608	0	-1.80963	0	-1.59191	0	-1.63089	0
ribosomal protein S16 [Source:MGI Symbol;Acc:MGI:98118]	Rps16	-0.0899413	1	0.176399	1	-0.958165	0	-1.62202	0
ER membrane protein complex subunit 10 [Source:MGI Symbol;Acc:MGI:1916933]	Emc10	-0.0820886	1	-0.648607	0	-1.57665	0	-1.61433	0
matrix Gla protein [Source:MGI Symbol;Acc:MGI:96976]	Mgp	2.7245	0	4.09959	0	0.217913	1	-1.60884	0
TGF-beta activated kinase 1/MAP3K7 binding protein 3 [Source:MGI Symbol;Acc:MGI:1913974]	Tab3	0.209466	1	0.192283	1	-1.51139	0	-1.60843	0
septin 2 [Source:MGI Symbol;Acc:MGI:97298]	2002-09-01	-0.210214	1	-0.621215	0	-1.5426	0	-1.60521	0
met proto-oncogene [Source:MGI Symbol;Acc:MGI:96969]	Met	-0.646641	0	-0.363997	0.0017	-1.51582	0	-1.59117	0
septin 2 [Source:MGI Symbol;Acc:MGI:97298]	2002-09-01	-0.267475	0.1569	-0.545285	0	-1.3524	0	-1.57254	0
aldehyde dehydrogenase family 3, subfamily A1 [Source:MGI Symbol;Acc:MGI:1353451]	Aldh3a1	-0.455997	0.6263	-1.18487	0	-0.196452	1	-1.56221	0
adaptor-related protein complex AP-4, sigma 1 [Source:MGI Symbol;Acc:MGI:1337065]	Ap4s1	-0.513059	0.0001	-1.14295	0	-1.46633	0	-1.55828	0
RING CCCH (C3H) domains 1 [Source:MGI Symbol;Acc:MGI:2685397]	Rc3h1	0.741773	0	1.81269	0	-2.07188	0	-1.54712	0
prostaglandin F2 receptor negative regulator [Source:MGI Symbol;Acc:MGI:1277114]	Ptgfrn	-0.402659	0.0207	-1.0934	0	-1.58061	0	-1.52813	0
cyclin-dependent kinase inhibitor 2D (p19, inhibits CDK4) [Source:MGI Symbol;Acc:MGI:105387]	Cdkn2d	-1.1843	0	-2.02249	0	-1.68105	0	-1.5248	0
stearoyl-Coenzyme A desaturase 2 [Source:MGI Symbol;Acc:MGI:98240]	Scd2	-1.86608	0	-3.01973	0	-1.24244	0	-1.51664	0
met proto-oncogene [Source:MGI Symbol;Acc:MGI:96969]	Met	-0.570017	0	-0.428824	0.4257	-1.51432	0	-1.50626	0
ribosomal protein L38 [Source:MGI Symbol;Acc:MGI:1914921]	Rpl38	0.0177224	1	0.159784	1	-1.05951	0	-1.49877	0
tribbles homolog 2 (Drosophila) [Source:MGI Symbol;Acc:MGI:2145021]	Trib2	-0.651672	0.9998	-0.812187	1	-0.49848	1	-1.48653	0.0005
solute carrier family 25 (mitochondrial carrier, Graves disease autoantigen), member 16 [Source:MGI Symbol;Acc:MGI:1920382]	Slc25a16	0.223558	0.9994	0.533872	0.0192	-1.46936	0	-1.48349	0
septin 2 [Source:MGI Symbol;Acc:MGI:97298]	2002-09-01	-0.240173	1	-0.530554	0	-1.27634	0	-1.47062	0
asparagine-linked glycosylation 14 [Source:MGI Symbol;Acc:MGI:1914039]	Alg14	0.026276	1	-0.451206	0	-1.4716	0	-1.46688	0
neurexophilin and PC-esterase domain family, member 3 [Source:MGI Symbol;Acc:MGI:2686598]	Nxpe3	-0.249673	1	-0.247909	1	-1.0189	0	-1.46685	0
RIKEN cDNA 9230110C19 gene [Source:MGI Symbol;Acc:MGI:3045346]	9230110C19Rik	-0.149604	1	-0.143961	1	-1.43851	0	-1.46666	0
neuroblastoma ras oncogene [Source:MGI Symbol;Acc:MGI:97376]	Nras	-0.0400993	1	-0.489858	0	-1.34933	0	-1.46149	0
receptor-like tyrosine kinase [Source:MGI Symbol;Acc:MGI:101766]	Ryk	0.338453	0.0495	0.123587	1	-1.25225	0	-1.45651	0
differentially expressed in FDCP 6 [Source:MGI Symbol;Acc:MGI:1346328]	Def6	-0.833323	0	-0.881826	0	-1.35656	0	-1.44858	0
RIO kinase 3 (yeast) [Source:MGI Symbol;Acc:MGI:1914128]	Riok3	0.808344	0	1.04718	0	-1.47354	0	-1.4403	0
SYS1 Golgi-localized integral membrane protein homolog (S. cerevisiae) [Source:MGI Symbol;Acc:MGI:1913710]	Sys1	-0.695358	0	-0.852107	0	-1.26194	0	-1.43671	0
tripartite motif-containing 2 [Source:MGI Symbol;Acc:MGI:1933163]	Trim2	-0.312038	0.3336	0.434519	0.004	-0.688025	0.0001	-1.42368	0
transmembrane protein 18 [Source:MGI Symbol;Acc:MGI:2387176]	Tmem18	-0.289478	0.7611	-0.16887	1	-1.22831	0	-1.41671	0
arrestin domain containing 3 [Source:MGI Symbol;Acc:MGI:2145242]	Arrdc3	-0.547609	0	-0.940265	0	-0.320075	0.0144	-1.41506	0
vesicle-associated membrane protein 3 [Source:MGI Symbol;Acc:MGI:1321389]	Vamp3	0.0161397	1	-0.198762	1	-1.37789	0	-1.41426	0
family with sequence similarity 69, member A [Source:MGI Symbol;Acc:MGI:1914516]	Fam69a	0.755674	0	0.492386	0	-1.29538	0	-1.41356	0
synaptojanin 2 binding protein [Source:MGI Symbol;Acc:MGI:1344347]	Synj2bp	0.496278	0	0.457962	0.0221	-1.48912	0	-1.41069	0
UDP glucuronosyltransferase 1 family, polypeptide A6A [Source:MGI Symbol;Acc:MGI:2137698]	Ugt1a6a	-0.113764	1	-1.39343	0	-0.837852	0.0001	-1.41024	0
kelch domain containing 10 [Source:MGI Symbol;Acc:MGI:1924038]	Klhdc10	-0.155548	1	-0.139593	1	-1.16498	0	-1.40688	0
adaptor-related protein complex AP-4, sigma 1 [Source:MGI Symbol;Acc:MGI:1337065]	Ap4s1	-0.477297	0.0001	-1.0063	0	-1.49421	0	-1.40167	0
PHD finger protein 15 [Source:MGI Symbol;Acc:MGI:1924151]	Phf15	-0.481394	0.0001	-0.672494	0	-0.841924	0	-1.39705	0
casein kinase 2, alpha prime polypeptide [Source:MGI Symbol;Acc:MGI:88547]	Csnk2a2	-0.655403	0	-1.23215	0	-1.40929	0	-1.38976	0
polo-like kinase 1 substrate 1 [Source:MGI Symbol;Acc:MGI:2684960]	Plk1s1	0.66257	0	0.948369	0	-0.881183	0	-1.3895	0
forkhead box O1 [Source:MGI Symbol;Acc:MGI:1890077]	Foxo1	-0.106503	1	-0.483553	0	-1.27607	0	-1.38874	0
solute carrier family 35 (UDP-N-acetylglucosamine (UDP-GlcNAc) transporter), member 3 [Source:MGI Symbol;Acc:MGI:1917648]	Slc35a3	0.0998607	1	-0.175594	1	-1.48226	0	-1.38625	0
R3H domain containing 1 [Source:MGI Symbol;Acc:MGI:2448514]	R3hdm1	-0.270518	0.8237	-0.311476	0.0264	-1.33892	0	-1.37385	0
protein kinase, AMP-activated, alpha 1 catalytic subunit [Source:MGI Symbol;Acc:MGI:2145955]	Prkaa1	0.511691	0.0001	0.565344	0	-1.3628	0	-1.37384	0
nephrocan [Source:MGI Symbol;Acc:MGI:1913900]	Nepn	-0.027497	1	-1.08708	0	-0.946447	0	-1.36338	0
forkhead box O1 [Source:MGI Symbol;Acc:MGI:1890077]	Foxo1	0.00367419	1	-0.218029	1	-1.21222	0	-1.36058	0
R3H domain containing 1 [Source:MGI Symbol;Acc:MGI:2448514]	R3hdm1	-0.27695	0.514	-0.409736	0	-1.26947	0	-1.3601	0
family with sequence similarity 116, member A [Source:MGI Symbol;Acc:MGI:2442980]	Fam116a	0.2027	1	0.287874	0.6039	-1.23078	0	-1.35953	0
phosphatase, orphan 2 [Source:MGI Symbol;Acc:MGI:1920623]	Phospho2	0.468583	0	0.943141	0	-1.36377	0	-1.35941	0
receptor (calcitonin) activity modifying protein 2 [Source:MGI Symbol;Acc:MGI:1859650]	Ramp2	0.128782	1	0.225139	1	-1.17655	0	-1.35618	0
lysophosphatidylglycerol acyltransferase 1 [Source:MGI Symbol;Acc:MGI:2446186]	Lpgat1	-0.438567	0.2731	-0.314605	0.0167	-1.52355	0	-1.35597	0
aryl hydrocarbon receptor nuclear translocator [Source:MGI Symbol;Acc:MGI:88071]	Arnt	0.511812	0.0029	0.941527	0	-1.46978	0	-1.35227	0
nuclear receptor coactivator 7 [Source:MGI Symbol;Acc:MGI:2444847]	Ncoa7	1.48445	0	1.63338	0	-1.42826	0	-1.34232	0
ER membrane protein complex subunit 10 [Source:MGI Symbol;Acc:MGI:1916933]	Emc10	-0.062407	1	-0.385746	0.0063	-1.31239	0	-1.34225	0
transmembrane protein 20 [Source:MGI Symbol;Acc:MGI:2444789]	Tmem20	-1.51686	0	-1.9878	0	-1.33106	0	-1.33937	0
kelch domain containing 10 [Source:MGI Symbol;Acc:MGI:1924038]	Klhdc10	-0.0586307	1	-0.0859285	1	-1.02272	0	-1.33562	0
zinc finger, HIT domain containing 1 [Source:MGI Symbol;Acc:MGI:1917353]	Znhit1	-0.0863251	1	-0.266569	0.23	-1.14498	0	-1.32503	0
WD repeat domain 72 [Source:MGI Symbol;Acc:MGI:3583957]	Wdr72	-0.304687	0.8164	-0.907798	0.002	-0.698136	0.0045	-1.31867	0
killer cell lectin-like receptor, subfamily A, member 1 [Source:MGI Symbol;Acc:MGI:101907]	Klra1	-1.4678	0	-3.0099	0	-1.14511	0	-1.30314	0
trichorhinophalangeal syndrome I (human) [Source:MGI Symbol;Acc:MGI:1927616]	Trps1	0.84	0	1.06534	0	-0.833477	0	-1.30193	0
GPN-loop GTPase 1 [Source:MGI Symbol;Acc:MGI:1921504]	Gpn1	-0.567126	0	-0.931742	0	-1.55879	0	-1.30155	0
tripartite motif-containing 2 [Source:MGI Symbol;Acc:MGI:1933163]	Trim2	-0.231183	1	0.218967	1	-0.558436	0	-1.29857	0
glyoxalase 1 [Source:MGI Symbol;Acc:MGI:95742]	Glo1	0.166985	1	-0.288674	0.8697	-1.16382	0	-1.29792	0
zinc finger protein 238 [Source:MGI Symbol;Acc:MGI:1353609]	Zfp238	-0.514468	0	-0.750249	0	-1.23812	0	-1.29709	0
UBX domain protein 2A [Source:MGI Symbol;Acc:MGI:2442310]	Ubxn2a	0.857057	0	1.18613	0	-1.33667	0	-1.29179	0
synovial sarcoma, X breakpoint 2 interacting protein [Source:MGI Symbol;Acc:MGI:2139150]	Ssx2ip	-0.917227	0	-1.52941	0	-1.23419	0	-1.2824	0
killer cell lectin-like receptor, subfamily A, member 1 [Source:MGI Symbol;Acc:MGI:101907]	Klra1	-1.34378	0	-2.52102	0	-1.03393	0	-1.28037	0
protein tyrosine phosphatase 4a1 [Source:MGI Symbol;Acc:MGI:1277096]	Ptp4a1	-0.560507	0	-0.870226	0	-1.41815	0	-1.27923	0
cyclin E2 [Source:MGI Symbol;Acc:MGI:1329034]	Ccne2	-1.88271	0	-2.70471	0	-1.16487	0	-1.27752	0
methylthioadenosine phosphorylase [Source:MGI Symbol;Acc:MGI:1914152]	Mtap	0.337289	0.0102	0.617054	0	-0.707652	0	-1.27739	0
aquaporin 5 [Source:MGI Symbol;Acc:MGI:106215]	Aqp5	-2.43876	0	-2.32822	0	-0.911199	0	-1.27642	0
mindbomb homolog 1 (Drosophila) [Source:MGI Symbol;Acc:MGI:2443157]	Mib1	0.0691109	1	-0.239501	0.7057	-1.0937	0	-1.27513	0
progestin and adipoQ receptor family member V [Source:MGI Symbol;Acc:MGI:1921340]	Paqr5	0.524816	0	-0.0778433	1	-0.839627	0	-1.27127	0
DNA segment, Chr 2, ERATO Doi 750, expressed [Source:MGI Symbol;Acc:MGI:1289298]	D2Ertd750e	-1.17436	0	-3.67829	0	-1.34649	0	-1.26893	0
transformation related protein 63 regulated like [Source:MGI Symbol;Acc:MGI:1915058]	Tprgl	1.49911	0	1.58097	0	-0.982166	0	-1.26144	0
BCL2 modifying factor [Source:MGI Symbol;Acc:MGI:2176433]	Bmf	1.32624	0	3.07446	0	-0.422039	1	-1.26085	0
killer cell lectin-like receptor, subfamily A, member 4 [Source:MGI Symbol;Acc:MGI:101904]	Klra4	-1.41381	0	-2.84838	0	-0.969093	0	-1.25752	0
glyoxalase domain containing 5 [Source:MGI Symbol;Acc:MGI:1917074]	Glod5	1.26397	0	1.72905	0	-0.297812	0.9962	-1.25525	0
G-rich RNA sequence binding factor 1 [Source:MGI Symbol;Acc:MGI:106479]	Grsf1	0.462702	0	0.569112	0	-1.17952	0	-1.25265	0
killer cell lectin-like receptor, subfamily A, member 4 [Source:MGI Symbol;Acc:MGI:101904]	Klra4	-1.54021	0	-2.32461	0	-0.993275	0	-1.25119	0
transmembrane protein 18 [Source:MGI Symbol;Acc:MGI:2387176]	Tmem18	-0.251288	1	-0.231327	1	-1.1042	0	-1.25099	0
glyoxalase 1 [Source:MGI Symbol;Acc:MGI:95742]	Glo1	0.234722	0.935	-0.111544	1	-1.11505	0	-1.25026	0
zinc finger, HIT domain containing 1 [Source:MGI Symbol;Acc:MGI:1917353]	Znhit1	-0.0375591	1	-0.219126	1	-1.1211	0	-1.24268	0
core binding factor beta [Source:MGI Symbol;Acc:MGI:99851]	Cbfb	-0.265546	0.2997	-0.483216	0	-1.24171	0	-1.23821	0
glutathione S-transferase, mu 1 [Source:MGI Symbol;Acc:MGI:95860]	Gstm1	0.50284	0.0013	0.886995	0	-0.15249	1	-1.23296	0
chondroitin sulfate synthase 1 [Source:MGI Symbol;Acc:MGI:2681120]	Chsy1	-0.580819	0	-1.05691	0	-1.3724	0	-1.23292	0
partner of NOB1 homolog (S. cerevisiae) [Source:MGI Symbol;Acc:MGI:1913499]	Pno1	-0.470863	0	-0.243052	0.7502	-1.34238	0	-1.23179	0
family with sequence similarity 199, X-linked [Source:MGI Symbol;Acc:MGI:2384304]	Fam199x	-0.380007	0.0142	-0.799724	0	-1.22954	0	-1.2271	0
met proto-oncogene [Source:MGI Symbol;Acc:MGI:96969]	Met	0.164349	1	0.448658	0.0197	-0.408121	0.0273	-1.22587	0.0263
kelch domain containing 10 [Source:MGI Symbol;Acc:MGI:1924038]	Klhdc10	-0.134293	1	-0.185299	1	-1.01548	0	-1.22578	0
phytanoyl-CoA dioxygenase domain containing 1 [Source:MGI Symbol;Acc:MGI:3612860]	Phyhd1	0.582257	0	0.473849	1	-0.31235	1	-1.21689	0.0001
cellular retinoic acid binding protein II [Source:MGI Symbol;Acc:MGI:88491]	Crabp2	-1.22368	0	-0.977446	0	-0.137335	1	-1.21519	0
spastic paraplegia 20, spartin (Troyer syndrome) homolog (human) [Source:MGI Symbol;Acc:MGI:2139806]	Spg20	-0.230501	1	-0.930468	0	-1.32104	0	-1.21353	0
H1 histone family, member 0 [Source:MGI Symbol;Acc:MGI:95893]	H1f0	-1.29477	0	-2.51881	0	-0.792817	0	-1.21315	0
phosphatidylinositol 3 kinase, regulatory subunit, polypeptide 3 (p55) [Source:MGI Symbol;Acc:MGI:109277]	Pik3r3	-0.350261	0.8629	0.0726684	1	-0.551983	0.0013	-1.21072	0
killer cell lectin-like receptor, subfamily A, member 7 [Source:MGI Symbol;Acc:MGI:101901]	Klra7	-1.37372	0	-2.6654	0	-0.880192	0.0011	-1.21012	0
MAP kinase-interacting serine/threonine kinase 2 [Source:MGI Symbol;Acc:MGI:894279]	Mknk2	0.0884673	1	0.311247	0.9927	-0.774587	0	-1.2064	0
taxilin gamma [Source:MGI Symbol;Acc:MGI:3590652]	Txlng	0.316157	0.0545	0.303494	1	-1.28461	0	-1.20419	0
ligand dependent nuclear receptor corepressor-like [Source:MGI Symbol;Acc:MGI:2651932]	Lcorl	-0.761203	0	-1.81978	0	-1.12303	0	-1.20046	0
glutamine and serine rich 1 [Source:MGI Symbol;Acc:MGI:2138986]	Qser1	-0.0795985	1	-0.359359	0.0515	-0.826806	0	-1.20025	0
TNF receptor associated factor 4 [Source:MGI Symbol;Acc:MGI:1202880]	Traf4	-0.239818	0.7905	-0.149001	1	-1.26554	0	-1.19893	0
eukaryotic translation initiation factor 4, gamma 2 [Source:MGI Symbol;Acc:MGI:109207]	Eif4g2	-0.506086	0	-1.3472	0	-1.03201	0	-1.19819	0
RIKEN cDNA 5730409E04Rik gene [Source:MGI Symbol;Acc:MGI:3609248]	5730409E04Rik	0.023667	1	-0.0960547	1	-0.77234	0	-1.1903	0
ATPase, Na+/K+ transporting, alpha 1 polypeptide [Source:MGI Symbol;Acc:MGI:88105]	Atp1a1	-0.715228	0	-1.40922	0	-0.768686	0	-1.18637	0
microtubule-associated protein 1 light chain 3 beta [Source:MGI Symbol;Acc:MGI:1914693]	Map1lc3b	1.98634	0	2.67694	0	-0.876946	0	-1.18545	0
thioredoxin-related transmembrane protein 1 [Source:MGI Symbol;Acc:MGI:1919986]	Tmx1	-0.777089	0	-1.23586	0	-1.34482	0	-1.18475	0
catenin (cadherin associated protein), alpha-like 1 [Source:MGI Symbol;Acc:MGI:1859649]	Ctnnal1	-1.50797	0	-1.92497	0	-0.96786	0	-1.18395	0
killer cell lectin-like receptor, subfamily A, member 4 [Source:MGI Symbol;Acc:MGI:101904]	Klra4	-1.19997	0	-2.4617	0	-0.975218	0	-1.17872	0
RIKEN cDNA 4931406C07 gene [Source:MGI Symbol;Acc:MGI:1918234]	4931406C07Rik	0.462377	0.0032	1.39416	0	-0.915065	0	-1.17471	0
tetraspanin 1 [Source:MGI Symbol;Acc:MGI:1914055]	Tspan1	0.203364	1	0.652877	0	-0.0803731	1	-1.17329	0
RIKEN cDNA 4930420K17 gene [Source:MGI Symbol;Acc:MGI:3606159]	4930420K17Rik	1.82621	0	1.30412	0	-1.17415	0	-1.16605	0
killer cell lectin-like receptor, subfamily A, member 4 [Source:MGI Symbol;Acc:MGI:101904]	Klra4	-0.822697	0	-2.04324	0	-0.507527	0.0194	-1.16407	0
H1 histone family, member 0 [Source:MGI Symbol;Acc:MGI:95893]	H1f0	-1.29903	0	-2.38623	0	-0.817992	0	-1.16313	0
eyes absent 2 homolog (Drosophila) [Source:MGI Symbol;Acc:MGI:109341]	Eya2	-1.19622	0	-1.72473	0	-0.130452	1	-1.16182	0
heterogeneous nuclear ribonucleoprotein D-like [Source:MGI Symbol;Acc:MGI:1355299]	Hnrpdl	-0.85059	0	-1.75096	0	-1.07294	0	-1.15923	0
bone marrow stromal cell antigen 1 [Source:MGI Symbol;Acc:MGI:105370]	Bst1	0.199562	1	1.14099	0	-0.531475	0.0002	-1.15446	0
asparagine-linked glycosylation 14 [Source:MGI Symbol;Acc:MGI:1914039]	Alg14	-0.16943	1	-0.624993	0	-1.04271	0	-1.15372	0
early growth response 1 [Source:MGI Symbol;Acc:MGI:95295]	Egr1	1.8279	0	1.77919	0	-0.115102	1	-1.14797	0
glutathione S-transferase, mu 1 [Source:MGI Symbol;Acc:MGI:95860]	Gstm1	0.508358	0	0.865745	0	-0.128934	1	-1.14299	0
sorting nexin 12 [Source:MGI Symbol;Acc:MGI:1919331]	Snx12	-0.16718	1	-0.736848	0.1497	-1.32525	0	-1.14236	0
protein kinase, cAMP dependent, catalytic, alpha [Source:MGI Symbol;Acc:MGI:97592]	Prkaca	-0.231451	1	-0.640908	0	-0.77677	0	-1.14125	0
ADP-ribosylation factor guanine nucleotide-exchange factor 1(brefeldin A-inhibited) [Source:MGI Symbol;Acc:MGI:2442988]	Arfgef1	-0.0483122	1	-0.0295071	1	-0.898065	0	-1.13918	0
TAF13 RNA polymerase II, TATA box binding protein (TBP)-associated factor [Source:MGI Symbol;Acc:MGI:1913500]	Taf13	0.193696	1	0.24345	1	-1.36717	0	-1.13515	0
myeloid/lymphoid or mixed-lineage leukemia (trithorax homolog, Drosophila); translocated to, 1 [Source:MGI Symbol;Acc:MGI:1927238]	Mllt1	0.222409	1	0.467227	0	-1.09563	0	-1.13382	0
rod outer segment membrane protein 1 [Source:MGI Symbol;Acc:MGI:97998]	Rom1	-1.37951	0	-0.558406	0	-0.333534	1	-1.13271	0
transmembrane protein 127 [Source:MGI Symbol;Acc:MGI:1916720]	Tmem127	0.836053	0	1.56135	0	-0.627607	0	-1.12963	0
carbohydrate sulfotransferase 12 [Source:MGI Symbol;Acc:MGI:1929064]	Chst12	0.376368	0.0001	1.28531	0	-1.05852	0	-1.12872	0
FXYD domain-containing ion transport regulator 3 [Source:MGI Symbol;Acc:MGI:107497]	Fxyd3	0.467895	0.0009	1.17611	0	-0.475294	0.4391	-1.12356	0
eukaryotic translation initiation factor 5 [Source:MGI Symbol;Acc:MGI:95309]	Eif5	0.104873	1	-0.0192113	1	-1.17606	0	-1.12224	0
ankyrin repeat domain 49 [Source:MGI Symbol;Acc:MGI:1930842]	Ankrd49	-0.986116	0	-1.39284	0	-1.02293	0	-1.1218	0
microsomal glutathione S-transferase 2 [Source:MGI Symbol;Acc:MGI:2448481]	Mgst2	0.655599	0	0.298435	0.7032	-0.515627	1	-1.11845	0
thioredoxin-related transmembrane protein 1 [Source:MGI Symbol;Acc:MGI:1919986]	Tmx1	-0.757257	0	-1.28137	0	-1.21057	0	-1.1123	0
ORM1-like 1 (S. cerevisiae) [Source:MGI Symbol;Acc:MGI:2181669]	Ormdl1	-0.0746644	1	-0.0788973	1	-1.25488	0	-1.10861	0
family with sequence similarity 69, member A [Source:MGI Symbol;Acc:MGI:1914516]	Fam69a	0.732512	0	0.468844	0	-0.846343	0	-1.10812	0
nuclear receptor coactivator 7 [Source:MGI Symbol;Acc:MGI:2444847]	Ncoa7	1.56184	0	1.81044	0	-1.2383	0	-1.10692	0
ataxin 7-like 3B [Source:MGI Symbol;Acc:MGI:1914971]	Atxn7l3b	-0.16041	1	0.00498311	1	-0.743513	0	-1.10552	0
dystrophia myotonica-protein kinase [Source:MGI Symbol;Acc:MGI:94906]	Dmpk	-0.467647	0.0626	0.384525	0.2691	-0.492545	0	-1.10524	0
RRN3 RNA polymerase I transcription factor homolog (yeast) [Source:MGI Symbol;Acc:MGI:1925255]	Rrn3	-0.84096	0	-1.03583	0	-1.25336	0	-1.10474	0
transmembrane protein 125 [Source:MGI Symbol;Acc:MGI:1923409]	Tmem125	-1.19793	0	-1.49186	0	-1.1453	0	-1.10422	0
fatty acid desaturase 3 [Source:MGI Symbol;Acc:MGI:1928740]	Fads3	-0.101303	1	0.345328	0.0067	-1.23452	0	-1.10297	0
lipocalin 2 [Source:MGI Symbol;Acc:MGI:96757]	Lcn2	-0.981138	0	-0.340147	0.1736	-0.0870942	1	-1.10145	0
Fas associated factor family member 2 [Source:MGI Symbol;Acc:MGI:1923827]	Faf2	0.259676	0.643	0.545375	0	-0.962168	0	-1.09892	0
RIKEN cDNA 4931406C07 gene [Source:MGI Symbol;Acc:MGI:1918234]	4931406C07Rik	0.499323	0.0012	1.3865	0	-0.852159	0	-1.09639	0
family with sequence similarity 49, member B [Source:MGI Symbol;Acc:MGI:1923520]	Fam49b	-0.299997	0.8156	-0.817193	0	-1.11557	0	-1.09597	0
ADP-ribosylation factor guanine nucleotide-exchange factor 1(brefeldin A-inhibited) [Source:MGI Symbol;Acc:MGI:2442988]	Arfgef1	0.00239289	1	-0.0191908	1	-0.945724	0	-1.09039	0
transforming growth factor, beta 3 [Source:MGI Symbol;Acc:MGI:98727]	Tgfb3	0.553341	0	0.460816	0	-0.344088	1	-1.08635	0
N-acetyltransferase 15 (GCN5-related, putative) [Source:MGI Symbol;Acc:MGI:1922013]	Nat15	-0.314585	0.3494	0.107835	1	-1.22274	0	-1.08267	0
killer cell lectin-like receptor, subfamily A, member 8 [Source:MGI Symbol;Acc:MGI:102968]	Klra8	-1.43961	0	-2.27971	0	-0.662757	0.0125	-1.07891	0
ribosomal protein L22 like 1 [Source:MGI Symbol;Acc:MGI:1915278]	Rpl22l1	-0.0152284	1	-0.29147	0.9331	-1.02374	0	-1.07586	0
karyopherin (importin) alpha 6 [Source:MGI Symbol;Acc:MGI:1100836]	Kpna6	-0.265652	0.971	-0.382666	0.0063	-1.26262	0	-1.07584	0
tubby like protein 4 [Source:MGI Symbol;Acc:MGI:1916092]	Tulp4	0.272835	0.8971	0.431537	0.0002	-0.979072	0	-1.07411	0
serine/threonine kinase 38 [Source:MGI Symbol;Acc:MGI:2442572]	Stk38	1.11796	0	0.921223	0	-0.603277	0	-1.07059	0
ATPase, Na+/K+ transporting, alpha 1 polypeptide [Source:MGI Symbol;Acc:MGI:88105]	Atp1a1	-0.564218	0	-1.40402	0	-0.526652	0	-1.07001	0
phosphatidylinositol-5-phosphate 4-kinase, type II, alpha [Source:MGI Symbol;Acc:MGI:1298206]	Pip4k2a	-0.346226	0.0028	-0.518703	0.0001	-1.30219	0	-1.07	0
RIKEN cDNA 2700089E24 gene [Source:MGI Symbol;Acc:MGI:1914379]	2700089E24Rik	-0.164742	1	-0.154506	1	-0.799036	0	-1.06772	0
synovial sarcoma, X breakpoint 2 interacting protein [Source:MGI Symbol;Acc:MGI:2139150]	Ssx2ip	-0.83812	0	-1.40157	0	-0.934999	0	-1.06635	0
eukaryotic translation initiation factor 5 [Source:MGI Symbol;Acc:MGI:95309]	Eif5	-0.171559	1	-0.134669	1	-1.00028	0	-1.06565	0
casein kinase 2, alpha prime polypeptide [Source:MGI Symbol;Acc:MGI:88547]	Csnk2a2	-0.522416	0.0001	-0.962657	0	-0.93267	0	-1.06442	0
receptor-like tyrosine kinase [Source:MGI Symbol;Acc:MGI:101766]	Ryk	0.329732	0.9988	0.127633	1	-0.883606	0	-1.0618	0
cyclin-dependent kinase 19 [Source:MGI Symbol;Acc:MGI:1925584]	Cdk19	0.920895	0	0.990178	0	-0.72387	0	-1.05865	0
rhophilin, Rho GTPase binding protein 2 [Source:MGI Symbol;Acc:MGI:1289234]	Rhpn2	-1.39274	0	-1.67223	0	-1.1169	0	-1.05649	0
huntingtin interacting protein 1 [Source:MGI Symbol;Acc:MGI:1099804]	Hip1	0.813812	0	1.16212	0	-0.660895	0	-1.05644	0
neuraminidase 1 [Source:MGI Symbol;Acc:MGI:97305]	Neu1	0.100964	1	-0.0895697	1	-1.16793	0	-1.05455	0
protein tyrosine phosphatase, non-receptor type 4 [Source:MGI Symbol;Acc:MGI:1099792]	Ptpn4	-0.437242	0.0001	-0.732306	0	-1.19366	0	-1.0537	0
nucleolar and coiled-body phosphoprotein 1 [Source:MGI Symbol;Acc:MGI:1918019]	Nolc1	-1.49705	0	-2.08422	0	-0.942451	0	-1.04949	0
NADH dehydrogenase (ubiquinone) flavoprotein 2 [Source:MGI Symbol;Acc:MGI:1920150]	Ndufv2	-0.061907	1	-0.517649	0	-1.03709	0	-1.04873	0
chromobox 1 [Source:MGI Symbol;Acc:MGI:105369]	Cbx1	-0.798258	0	-1.38699	0	-1.20086	0	-1.04796	0
ankyrin repeat domain 13c [Source:MGI Symbol;Acc:MGI:2139746]	Ankrd13c	0.934962	0	1.22276	0	-0.814661	0	-1.04606	0
ATP-binding cassette, sub-family D (ALD), member 4 [Source:MGI Symbol;Acc:MGI:1349217]	Abcd4	0.209316	1	-0.286529	0.9527	-0.979339	0	-1.03935	0
SET domain containing (lysine methyltransferase) 8 [Source:MGI Symbol;Acc:MGI:1915206]	Setd8	-0.802582	0	-0.644093	0	-1.13173	0	-1.03544	0
amyotrophic lateral sclerosis 2 (juvenile) [Source:MGI Symbol;Acc:MGI:1921268]	Als2	-0.218065	1	-0.656977	0	-0.82068	0	-1.03453	0
myosin binding protein C, fast-type [Source:MGI Symbol;Acc:MGI:1336170]	Mybpc2	-0.50852	0.0964	-0.680167	0.008	-0.437041	0.8128	-1.03046	0
exocyst complex component 8 [Source:MGI Symbol;Acc:MGI:2142527]	Exoc8	-0.713381	0	-0.272515	0.2387	-1.01881	0	-1.02943	0
Eph receptor A1 [Source:MGI Symbol;Acc:MGI:107381]	Epha1	0.0593553	1	0.00883106	1	-0.721152	0	-1.02942	0
programmed cell death 6 interacting protein [Source:MGI Symbol;Acc:MGI:1333753]	Pdcd6ip	-0.434754	0.0001	-0.662826	0	-1.03799	0	-1.02927	0
high mobility group 20A [Source:MGI Symbol;Acc:MGI:1914117]	Hmg20a	0.176757	1	0.271211	1	-0.756558	0	-1.02918	0
ribosomal protein L9 [Source:MGI Symbol;Acc:MGI:1298373]	Rpl9	-0.0236466	1	0.073217	1	-0.892018	0	-1.02917	0
myeloid/lymphoid or mixed-lineage leukemia (trithorax homolog, Drosophila); translocated to, 3 [Source:MGI Symbol;Acc:MGI:1917372]	Mllt3	-0.416785	0.0015	-1.25717	0	-0.379774	0.0021	-1.02869	0
transmembrane protein 176A [Source:MGI Symbol;Acc:MGI:1913308]	Tmem176a	0.303062	0.6615	0.805812	0	-0.458418	0	-1.02853	0
nuclear receptor subfamily 2, group F, member 1 [Source:MGI Symbol;Acc:MGI:1352451]	Nr2f1	-0.138364	1	-0.359788	1	-0.595596	0.0352	-1.02831	0
atlastin GTPase 2 [Source:MGI Symbol;Acc:MGI:1929492]	Atl2	-0.693003	0	-1.41252	0	-1.15607	0	-1.0283	0
RAB2A, member RAS oncogene family [Source:MGI Symbol;Acc:MGI:1928750]	Rab2a	0.188008	1	-0.15889	1	-0.896646	0	-1.0274	0
ELAV (embryonic lethal, abnormal vision, Drosophila)-like 4 (Hu antigen D) [Source:MGI Symbol;Acc:MGI:107427]	Elavl4	0.0337507	1	-0.00516109	1	-0.684429	0	-1.02669	0
disabled 2 interacting protein [Source:MGI Symbol;Acc:MGI:1916851]	Dab2ip	-0.853955	0	-1.13173	0	-0.818322	0	-1.02587	0
ribosome binding protein 1 [Source:MGI Symbol;Acc:MGI:1932395]	Rrbp1	-0.343308	0.8295	-0.978003	0	-0.767297	0	-1.02395	0
glutathione S-transferase, mu 3 [Source:MGI Symbol;Acc:MGI:106026]	Gstm3	0.395183	0.1623	0.829533	0	-0.0938667	1	-1.0204	0
chromobox 1 [Source:MGI Symbol;Acc:MGI:105369]	Cbx1	-0.637522	0	-1.11636	0	-0.919135	0	-1.01694	0
C-terminal binding protein 1 [Source:MGI Symbol;Acc:MGI:1201685]	Ctbp1	-0.132429	1	-0.6208	0	-0.781415	0	-1.01188	0
phosphatidylinositol transfer protein, alpha [Source:MGI Symbol;Acc:MGI:99887]	Pitpna	-0.670883	0	-0.918221	0	-0.660361	0	-1.00687	0
solute carrier family 25 (mitochondrial carrier oxoglutarate carrier), member 11 [Source:MGI Symbol;Acc:MGI:1915113]	Slc25a11	0.146629	1	0.385486	0.0057	-0.882106	0	-1.00566	0
cytochrome C oxidase assembly factor 5 [Source:MGI Symbol;Acc:MGI:1923428]	Coa5	-0.478318	0	-0.0893917	1	-1.14292	0	-1.00522	0
telomeric repeat binding factor 1 [Source:MGI Symbol;Acc:MGI:109634]	Terf1	0.198796	1	-0.524257	0	-1.1464	0	-1.0052	0
centrosomal protein 164 [Source:MGI Symbol;Acc:MGI:2384878]	Cep164	0.0190756	1	-0.766851	0	-0.821674	0	-1.00361	0
immediate early response 3 interacting protein 1 [Source:MGI Symbol;Acc:MGI:1913441]	Ier3ip1	0.000187538	1	-0.44842	0.0008	-1.11247	0	-1.00316	0
slingshot homolog 1 (Drosophila) [Source:MGI Symbol;Acc:MGI:2686240]	Ssh1	0.461298	0	1.32774	0	-0.764062	0	-1.0028	0
frizzled homolog 6 (Drosophila) [Source:MGI Symbol;Acc:MGI:108474]	Fzd6	-0.0292126	1	0.0338212	1	-0.775206	0	-1.00095	0
DCN1, defective in cullin neddylation 1, domain containing 1 (S. cerevisiae) [Source:MGI Symbol;Acc:MGI:2150386]	Dcun1d1	-0.155479	1	-0.435995	0	-0.991387	0	-1.00034	0
latent transforming growth factor beta binding protein 3 [Source:MGI Symbol;Acc:MGI:1101355]	Ltbp3	0.10596	1	0.593956	0	-0.576482	0	-0.99757	0
abhydrolase domain containing 13 [Source:MGI Symbol;Acc:MGI:1916154]	Abhd13	-0.101713	1	-0.272278	0.735	-0.930369	0	-0.996421	0
death inducer-obliterator 1 [Source:MGI Symbol;Acc:MGI:1344352]	Dido1	0.024419	1	0.37089	0.7605	-0.325297	1	-0.995362	0
sirtuin 1 (silent mating type information regulation 2, homolog) 1 (S. cerevisiae) [Source:MGI Symbol;Acc:MGI:2135607]	Sirt1	-0.089097	1	-0.176174	1	-0.715882	0	-0.99381	0
acetyl-Coenzyme A acyltransferase 1A [Source:MGI Symbol;Acc:MGI:2148491]	Acaa1a	0.292087	0.1282	0.653271	0	-0.803035	0	-0.99362	0
H1 histone family, member 0 [Source:MGI Symbol;Acc:MGI:95893]	H1f0	-0.991516	0	-1.82891	0	-0.575774	0	-0.990782	0
mesoderm specific transcript [Source:MGI Symbol;Acc:MGI:96968]	Mest	-1.50124	0	-1.13704	0	-0.826151	0	-0.989252	0
dual specificity phosphatase 11 (RNA/RNP complex 1-interacting) [Source:MGI Symbol;Acc:MGI:1919352]	Dusp11	-0.217073	1	-0.26758	0.3921	-0.944585	0	-0.987188	0
myristoylated alanine rich protein kinase C substrate [Source:MGI Symbol;Acc:MGI:96907]	Marcks	-0.0598032	1	0.0816532	1	-0.481729	0	-0.983492	0
SET domain containing (lysine methyltransferase) 8 [Source:MGI Symbol;Acc:MGI:1915206]	Setd8	-0.706281	0	-0.780825	0	-0.93035	0	-0.982916	0
inhibin beta-B [Source:MGI Symbol;Acc:MGI:96571]	Inhbb	-2.51594	0	-2.48981	0	-0.930375	0	-0.981016	0
G elongation factor, mitochondrial 1 [Source:MGI Symbol;Acc:MGI:107339]	Gfm1	-0.130983	1	-0.463887	0	-1.06622	0	-0.979715	0
ribosome binding protein 1 [Source:MGI Symbol;Acc:MGI:1932395]	Rrbp1	-1.19143	0	-1.13905	0	-0.553352	0	-0.978543	0
cyclin E2 [Source:MGI Symbol;Acc:MGI:1329034]	Ccne2	-1.30241	0	-1.97117	0	-0.91407	0	-0.97576	0
transmembrane protein 176A [Source:MGI Symbol;Acc:MGI:1913308]	Tmem176a	0.280018	1	0.700608	0	-0.373395	0.0086	-0.975754	0
myeloid/lymphoid or mixed-lineage leukemia (trithorax homolog, Drosophila); translocated to, 3 [Source:MGI Symbol;Acc:MGI:1917372]	Mllt3	-0.476908	0	-0.853499	0	-0.43435	0.042	-0.972982	0
lysophosphatidylglycerol acyltransferase 1 [Source:MGI Symbol;Acc:MGI:2446186]	Lpgat1	-0.61407	0	0.0669502	1	-0.875587	0	-0.968797	0
WD repeat and FYVE domain containing 3 [Source:MGI Symbol;Acc:MGI:1096875]	Wdfy3	0.556581	0	0.195171	1	-0.738736	0	-0.966965	0
G elongation factor, mitochondrial 1 [Source:MGI Symbol;Acc:MGI:107339]	Gfm1	-0.352855	0.1094	-0.8818	0	-1.25016	0	-0.966638	0
cyclin-dependent kinase inhibitor 2B (p15, inhibits CDK4) [Source:MGI Symbol;Acc:MGI:104737]	Cdkn2b	1.62492	0	2.21478	0	-0.738893	0	-0.966044	0
glucosamine (UDP-N-acetyl)-2-epimerase/N-acetylmannosamine kinase [Source:MGI Symbol;Acc:MGI:1354951]	Gne	0.136966	1	0.328296	1	-0.996683	0	-0.965119	0
RIKEN cDNA 2310045N01 gene [Source:MGI Symbol;Acc:MGI:1919618]	2310045N01Rik	0.477398	0	1.51391	0	-0.636806	0	-0.962696	0
pleiomorphic adenoma gene-like 2 [Source:MGI Symbol;Acc:MGI:1933165]	Plagl2	-0.0435983	1	0.539203	0	-0.906115	0	-0.959775	0
selenophosphate synthetase 1 [Source:MGI Symbol;Acc:MGI:1923580]	Sephs1	-0.481451	0	-1.06849	0	-0.820334	0	-0.956426	0
LPS-responsive beige-like anchor [Source:MGI Symbol;Acc:MGI:1933162]	Lrba	-0.265886	0.9391	-0.771616	0	-0.887417	0	-0.954574	0
pyruvate dehydrogenase kinase, isoenzyme 1 [Source:MGI Symbol;Acc:MGI:1926119]	Pdk1	-0.97222	0	-1.25951	0	-0.362653	0.0024	-0.954118	0
RIKEN cDNA 1700026L06 gene [Source:MGI Symbol;Acc:MGI:1917237]	1700026L06Rik	-0.00669809	1	-0.480434	0.0005	-0.471127	0.0052	-0.954029	0
AHNAK nucleoprotein (desmoyokin) [Source:MGI Symbol;Acc:MGI:1316648]	Ahnak	-0.0716198	1	0.258169	0.9339	-0.537428	0	-0.952358	0
AT rich interactive domain 2 (ARID, RFX-like) [Source:MGI Symbol;Acc:MGI:1924294]	Arid2	0.95067	0	0.657713	0.0359	-0.780002	0	-0.949034	0
SERTA domain containing 2 [Source:MGI Symbol;Acc:MGI:1931026]	Sertad2	0.952676	0	0.826689	0	-0.946005	0	-0.947398	0
enhancer trap locus 4 [Source:MGI Symbol;Acc:MGI:95454]	Etl4	2.33452	0	2.69958	0	-0.412466	0.0001	-0.942595	0
regulation of nuclear pre-mRNA domain containing 2 [Source:MGI Symbol;Acc:MGI:1922387]	Rprd2	0.893331	0	0.735851	0	-0.699274	0	-0.941628	0
Rho GTPase activating protein 19 [Source:MGI Symbol;Acc:MGI:1918335]	Arhgap19	-0.816494	0	-3.69303	0	-1.30918	0	-0.940999	0
myeloid/lymphoid or mixed-lineage leukemia (trithorax homolog, Drosophila); translocated to, 3 [Source:MGI Symbol;Acc:MGI:1917372]	Mllt3	-0.490416	0	-0.861018	0	-0.385997	1	-0.940384	0
RIKEN cDNA 2900026A02 gene [Source:MGI Symbol;Acc:MGI:1920194]	2900026A02Rik	-0.350684	0.066	0.429225	0	-0.641687	0	-0.935548	0
microrchidia 4 [Source:MGI Symbol;Acc:MGI:1922996]	Morc4	0.376168	0.0166	-0.343041	0.0005	-0.608054	0	-0.932851	0
aldolase A, fructose-bisphosphate [Source:MGI Symbol;Acc:MGI:87994]	Aldoa	-0.163072	1	0.116365	1	-0.457936	0	-0.930831	0
A kinase (PRKA) anchor protein 11 [Source:MGI Symbol;Acc:MGI:2684060]	Akap11	-0.36119	0.211	-0.737302	0	-0.984557	0	-0.929229	0
SERTA domain containing 4 [Source:MGI Symbol;Acc:MGI:2443496]	Sertad4	-1.78812	0	-1.76277	0	-0.823879	0	-0.927633	0
notch 2 [Source:MGI Symbol;Acc:MGI:97364]	Notch2	0.214199	1	-0.000971261	1	-0.906229	0	-0.927365	0
clusterin [Source:MGI Symbol;Acc:MGI:88423]	Clu	1.7521	0	1.08255	0	-0.594611	0	-0.922762	0
arrestin domain containing 4 [Source:MGI Symbol;Acc:MGI:1913662]	Arrdc4	-0.634825	0	0.469407	0	-0.0388138	1	-0.916763	0
DnaJ (Hsp40) homolog, subfamily A, member 4 [Source:MGI Symbol;Acc:MGI:1927638]	Dnaja4	-1.4629	0	-2.94226	0	-1.0242	0	-0.914472	0
quaking [Source:MGI Symbol;Acc:MGI:97837]	Qk	-0.0521693	1	-0.507345	0	-1.1744	0	-0.913662	0
cytochrome P450, family 51 [Source:MGI Symbol;Acc:MGI:106040]	Cyp51	-1.30968	0	-3.0137	0	-0.744255	0	-0.913167	0
polymerase (RNA) II (DNA directed) polypeptide E [Source:MGI Symbol;Acc:MGI:1913670]	Polr2e	-0.208399	1	-0.288216	0.9963	-0.869976	0	-0.91038	0
retinoic acid induced 1 [Source:MGI Symbol;Acc:MGI:103291]	Rai1	-0.690959	0	-0.666787	0	-0.267054	0.1071	-0.910133	0
SET domain containing (lysine methyltransferase) 8 [Source:MGI Symbol;Acc:MGI:1915206]	Setd8	-0.638191	0	-0.607773	0	-0.922711	0	-0.909968	0
NAD(P)H dehydrogenase, quinone 1 [Source:MGI Symbol;Acc:MGI:103187]	Nqo1	-0.504104	0	-1.71005	0	-0.128178	1	-0.907286	0
cyclin-dependent kinase 19 [Source:MGI Symbol;Acc:MGI:1925584]	Cdk19	0.665438	0	0.343806	0.0016	-0.703055	0	-0.906846	0
density-regulated protein [Source:MGI Symbol;Acc:MGI:1915434]	Denr	-0.662981	0	0.049352	1	-0.894397	0	-0.906532	0
family with sequence similarity 109, member A [Source:MGI Symbol;Acc:MGI:2442708]	Fam109a	1.41176	0	2.08919	0	-0.636764	0	-0.906464	0
THAP domain containing, apoptosis associated protein 2 [Source:MGI Symbol;Acc:MGI:1914066]	Thap2	-0.290575	1	-0.410016	0.1829	-0.722965	0.014	-0.904108	0
cyclin D1 [Source:MGI Symbol;Acc:MGI:88313]	Ccnd1	-2.36175	0	-2.67426	0	-0.666006	0	-0.903093	0
solute carrier family 16 (monocarboxylic acid transporters), member 1 [Source:MGI Symbol;Acc:MGI:106013]	Slc16a1	-1.42149	0	-2.1255	0	-0.890316	0	-0.902829	0
solute carrier family 16 (monocarboxylic acid transporters), member 1 [Source:MGI Symbol;Acc:MGI:106013]	Slc16a1	-1.46472	0	-2.2261	0	-0.908396	0	-0.902322	0
pleckstrin and Sec7 domain containing 3 [Source:MGI Symbol;Acc:MGI:1918215]	Psd3	0.0888879	1	0.734864	0.0019	-0.459663	0.9851	-0.90181	0
cyclin-dependent kinase inhibitor 2A [Source:MGI Symbol;Acc:MGI:104738]	Cdkn2a	0.785107	0.0016	1.71703	0	-0.491099	0.5952	-0.901518	0.0006
cell division cycle associated 7 like [Source:MGI Symbol;Acc:MGI:2384982]	Cdca7l	-1.3899	0	-1.42033	0	-0.995693	0	-0.901322	0
acyl-Coenzyme A oxidase 2, branched chain [Source:MGI Symbol;Acc:MGI:1934852]	Acox2	-0.653285	0	-1.38073	0	-0.897912	0	-0.901128	0
RIKEN cDNA 1200011I18 gene [Source:MGI Symbol;Acc:MGI:1914717]	1200011I18Rik	0.31993	0.5531	0.600003	0	-0.819717	0	-0.900503	0
bicaudal D homolog 1 (Drosophila) [Source:MGI Symbol;Acc:MGI:1101760]	Bicd1	-0.784538	0	-0.713464	0	-0.552239	0.0072	-0.899692	0
zinc finger protein 451 [Source:MGI Symbol;Acc:MGI:2137896]	Zfp451	-0.227435	1	-0.175123	1	-0.769945	0	-0.899369	0
eukaryotic translation initiation factor 4, gamma 2 [Source:MGI Symbol;Acc:MGI:109207]	Eif4g2	-0.478035	0.1649	-1.06069	0	-0.725329	0	-0.898525	0
epsin 2 [Source:MGI Symbol;Acc:MGI:1333766]	Epn2	-0.632873	0	-0.519518	0.0027	-0.439498	0	-0.897904	0
eukaryotic translation initiation factor 4, gamma 2 [Source:MGI Symbol;Acc:MGI:109207]	Eif4g2	-0.515612	0	-1.07335	0	-0.831343	0	-0.897388	0
protein phosphatase 1, regulatory (inhibitor) subunit 12A [Source:MGI Symbol;Acc:MGI:1309528]	Ppp1r12a	0.583201	0	-0.071729	1	-0.932672	0	-0.896265	0
TNF receptor-associated factor 6 [Source:MGI Symbol;Acc:MGI:108072]	Traf6	0.362341	0.0001	0.395315	0.0007	-0.582389	0	-0.895953	0
UDP-N-acetyl-alpha-D-galactosamine:polypeptide N-acetylgalactosaminyltransferase 3 [Source:MGI Symbol;Acc:MGI:894695]	Galnt3	-0.244588	0.9998	-0.387413	0.4026	-1.22941	0	-0.892604	0
hydroxymethylbilane synthase [Source:MGI Symbol;Acc:MGI:96112]	Hmbs	-0.720365	0	-1.64427	0	-0.739606	0	-0.891108	0
transformer 2 alpha homolog (Drosophila) [Source:MGI Symbol;Acc:MGI:1933972]	Tra2a	0.213192	1	-0.637839	0	-0.455463	0	-0.890899	0
insulin-like growth factor 2 mRNA binding protein 1 [Source:MGI Symbol;Acc:MGI:1890357]	Igf2bp1	0.51782	0	1.33636	0	-0.682545	0.0221	-0.889452	0
scleraxis [Source:MGI Symbol;Acc:MGI:102934]	Scx	-2.075	0	-1.97033	0	-0.717169	0	-0.88918	0
LMBR1 domain containing 2 [Source:MGI Symbol;Acc:MGI:2444173]	Lmbrd2	0.119117	1	0.236793	0.9996	-0.022005	1	-0.887545	1
UDP-N-acetyl-alpha-D-galactosamine:polypeptide N-acetylgalactosaminyltransferase 3 [Source:MGI Symbol;Acc:MGI:894695]	Galnt3	-0.300404	0.4488	-0.337129	0.0635	-1.31181	0	-0.887289	0
RIKEN cDNA A830082K12 gene [Source:MGI Symbol;Acc:MGI:2443527]	A830082K12Rik	-0.434235	0.0022	-0.607006	0.16	-0.680666	0	-0.887185	0
AHNAK nucleoprotein (desmoyokin) [Source:MGI Symbol;Acc:MGI:1316648]	Ahnak	0.0269983	1	-0.0127985	1	-0.383501	0.0025	-0.885718	0
killer cell lectin-like receptor, subfamily A, member 1 [Source:MGI Symbol;Acc:MGI:101907]	Klra1	-1.07332	0	-1.65434	0	-0.353148	1	-0.885095	0
discs, large homolog 5 (Drosophila) [Source:MGI Symbol;Acc:MGI:1918478]	Dlg5	-0.481815	0	-0.331581	0.1013	-0.699539	0	-0.884522	0
L-2-hydroxyglutarate dehydrogenase [Source:MGI Symbol;Acc:MGI:2384968]	L2hgdh	-0.698548	0	-1.31401	0	-1.02532	0	-0.884413	0
B9 protein domain 1 [Source:MGI Symbol;Acc:MGI:1351471]	B9d1	-0.0631077	1	-0.057731	1	-0.46715	0	-0.884394	0
BCL2/adenovirus E1B interacting protein 3 [Source:MGI Symbol;Acc:MGI:109326]	Bnip3	0.165455	1	0.315149	0.0144	-0.329812	0.0011	-0.884125	0
ADP-ribosylation factor-like 5B [Source:MGI Symbol;Acc:MGI:1923119]	Arl5b	0.526459	0	0.353944	0.0221	-1.06316	0	-0.883377	0
meteorin, glial cell differentiation regulator-like [Source:MGI Symbol;Acc:MGI:2384806]	Metrnl	-0.163161	1	0.576725	0	-0.928366	0	-0.88256	0
eukaryotic translation initiation factor 4, gamma 2 [Source:MGI Symbol;Acc:MGI:109207]	Eif4g2	-0.464482	0.003	-1.01079	0	-0.87505	0	-0.88209	0
discs, large homolog 3 (Drosophila) [Source:MGI Symbol;Acc:MGI:1888986]	Dlg3	-0.498246	0	-0.375731	0.0002	-0.965525	0	-0.882018	0
thioredoxin interacting protein [Source:MGI Symbol;Acc:MGI:1889549]	Txnip	0.799145	0	2.5345	0	-0.0135425	1	-0.88134	0
core binding factor beta [Source:MGI Symbol;Acc:MGI:99851]	Cbfb	-0.21646	1	-0.422459	0	-1.00815	0	-0.877749	0
neuraminidase 1 [Source:MGI Symbol;Acc:MGI:97305]	Neu1	0.0226022	1	-0.157536	1	-0.642513	0.001	-0.87663	0
mbt domain containing 1 [Source:MGI Symbol;Acc:MGI:2143977]	Mbtd1	0.609764	0	0.953139	0	-0.615311	0	-0.874248	0
cDNA sequence BC096441 [Source:MGI Symbol;Acc:MGI:3845075]	BC096441	0.402318	0.0053	0.864802	0	-0.0731413	1	-0.873701	0
coactosin-like 1 (Dictyostelium) [Source:MGI Symbol;Acc:MGI:1919292]	Cotl1	0.4097	0.0001	-0.29305	0.0907	-0.340759	0.4805	-0.872816	0
serine incorporator 3 [Source:MGI Symbol;Acc:MGI:1349457]	Serinc3	1.15043	0	1.64125	0	-0.577397	0	-0.872457	0
zinc finger, ZZ domain containing 3 [Source:MGI Symbol;Acc:MGI:1920453]	Zzz3	-0.234377	1	-0.497519	0	-0.756862	0	-0.869438	0
ecto-NOX disulfide-thiol exchanger 2 [Source:MGI Symbol;Acc:MGI:2384799]	Enox2	-0.0935988	1	-0.343773	1	-1.04582	0	-0.868092	0
predicted gene 11488 [Source:MGI Symbol;Acc:MGI:3650705]	Gm11488	-0.631976	0	-1.09732	0	-0.920038	0	-0.868047	0
transmembrane protein 176B [Source:MGI Symbol;Acc:MGI:1916348]	Tmem176b	0.671112	0.002	1.20964	0	-0.186723	1	-0.867534	0
amplified in osteosarcoma [Source:MGI Symbol;Acc:MGI:1924301]	Os9	0.521332	0.0003	1.52529	0	-0.693199	0	-0.866713	0
transformer 2 alpha homolog (Drosophila) [Source:MGI Symbol;Acc:MGI:1933972]	Tra2a	0.224423	0.978	-0.37501	0.0196	-0.481779	0.0014	-0.86631	0
protein phosphatase 3, catalytic subunit, gamma isoform [Source:MGI Symbol;Acc:MGI:107162]	Ppp3cc	-0.166563	1	-0.578943	0	-0.563774	0	-0.866047	0
solute carrier family 44, member 3 [Source:MGI Symbol;Acc:MGI:2384860]	Slc44a3	-0.377441	0.0006	0.560881	0	-0.457312	0.0001	-0.865916	0
solute carrier family 16 (monocarboxylic acid transporters), member 1 [Source:MGI Symbol;Acc:MGI:106013]	Slc16a1	-1.18314	0	-1.82246	0	-0.744814	0	-0.863113	0
ring finger protein, LIM domain interacting [Source:MGI Symbol;Acc:MGI:1342291]	Rlim	-0.0831565	1	0.129125	1	-0.892114	0	-0.862712	0
Ngfi-A binding protein 1 [Source:MGI Symbol;Acc:MGI:107564]	Nab1	-0.548305	0	-0.460814	0	-0.75252	0	-0.862161	0
family with sequence similarity 199, X-linked [Source:MGI Symbol;Acc:MGI:2384304]	Fam199x	-0.374862	0.0106	-0.728495	0	-0.79129	0	-0.859758	0
caveolin 1, caveolae protein [Source:MGI Symbol;Acc:MGI:102709]	Cav1	1.3541	0	2.30817	0	-1.40037	0	-0.859446	0
RAD54 like (S. cerevisiae) [Source:MGI Symbol;Acc:MGI:894697]	Rad54l	-0.857082	0	-1.51849	0	-0.81207	0	-0.859169	0.0001
nodal modulator 1 [Source:MGI Symbol;Acc:MGI:2385850]	Nomo1	-0.281656	0.9998	-0.848806	0	-0.981087	0	-0.858831	0
S-adenosylhomocysteine hydrolase-like 2 [Source:MGI Symbol;Acc:MGI:1921590]	Ahcyl2	-0.441629	0.0009	-0.192525	1	-0.437864	0	-0.858596	0
MOCO sulphurase C-terminal domain containing 2 [Source:MGI Symbol;Acc:MGI:1914497]	Mosc2	0.640973	0	1.21923	0	-0.328692	0.0238	-0.857215	0
vitamin D receptor [Source:MGI Symbol;Acc:MGI:103076]	Vdr	-0.0852839	1	0.26968	0.9995	-0.224442	1	-0.855614	0
aldolase 1 A retrogene 2 [Source:MGI Symbol;Acc:MGI:1931052]	Aldoart2	-0.230365	1	-0.182218	1	-0.350848	0.0061	-0.852758	0
activin receptor IIA [Source:MGI Symbol;Acc:MGI:102806]	Acvr2a	0.436162	0.0838	0.413453	0.0009	-0.66977	0	-0.852631	0
leucine rich repeat containing 26 [Source:MGI Symbol;Acc:MGI:2385129]	Lrrc26	-0.87242	0	-0.698068	0	-0.102994	1	-0.852631	0
endothelial cell surface expressed chemotaxis and apoptosis regulator [Source:MGI Symbol;Acc:MGI:1915795]	Ecscr	0.278163	0.3702	1.14821	0	-0.640281	0	-0.852165	0
ring finger protein 103 [Source:MGI Symbol;Acc:MGI:109483]	Rnf103	1.49124	0	1.9334	0	-0.709682	0.0001	-0.849188	0
cytochrome b5 domain containing 1 [Source:MGI Symbol;Acc:MGI:2685586]	Cyb5d1	0.21805	1	0.71315	0	-0.705836	0	-0.847476	0
SMAD family member 5 [Source:MGI Symbol;Acc:MGI:1328787]	Smad5	0.182057	1	0.037579	1	-0.706547	0	-0.846921	0
catenin (cadherin associated protein), alpha-like 1 [Source:MGI Symbol;Acc:MGI:1859649]	Ctnnal1	-1.15856	0	-1.58978	0	-0.760204	0	-0.845673	0
aldolase A, fructose-bisphosphate [Source:MGI Symbol;Acc:MGI:87994]	Aldoa	-0.183453	1	0.142727	1	-0.40846	0	-0.844898	0
zinc finger protein 740 [Source:MGI Symbol;Acc:MGI:1915994]	Zfp740	0.277354	0.4257	0.568032	0	-0.930158	0	-0.844499	0
absent in melanoma 1 [Source:MGI Symbol;Acc:MGI:109544]	Aim1	0.76707	0	0.692436	0	-0.822692	0	-0.844331	0
GAR1 ribonucleoprotein homolog (yeast) [Source:MGI Symbol;Acc:MGI:1930948]	Gar1	-1.1953	0	-1.9841	0	-0.988825	0	-0.842822	0
CDK5 and Abl enzyme substrate 2 [Source:MGI Symbol;Acc:MGI:2182335]	Cables2	-0.331679	0.0049	-0.39316	0.0001	-0.749829	0	-0.841914	0
protease, serine, 23 [Source:MGI Symbol;Acc:MGI:1923703]	Prss23	-1.11035	0	-1.66019	0	-1.01048	0	-0.841666	0
thrombospondin, type I, domain containing 4 [Source:MGI Symbol;Acc:MGI:2672033]	Thsd4	-0.241161	1	-0.285084	0.9434	-0.514643	0.0002	-0.841655	0.0002
A kinase (PRKA) anchor protein 11 [Source:MGI Symbol;Acc:MGI:2684060]	Akap11	-0.106967	1	-0.258708	0.3683	-0.73158	0	-0.84141	0
actin related protein 2/3 complex, subunit 1B [Source:MGI Symbol;Acc:MGI:1343142]	Arpc1b	-0.0843537	1	0.325398	0.0341	-0.715348	0	-0.840942	0
alcohol dehydrogenase 7 (class IV), mu or sigma polypeptide [Source:MGI Symbol;Acc:MGI:87926]	Adh7	0.230031	1	-0.0475889	1	-0.707353	0	-0.840562	0
sorting nexin 25 [Source:MGI Symbol;Acc:MGI:2142610]	Snx25	-1.18241	0	-1.91711	0	-0.579855	0	-0.8398	0
citrate synthase [Source:MGI Symbol;Acc:MGI:88529]	Cs	-0.375519	0.0052	-1.09843	0	-0.747691	0	-0.839506	0
Ngfi-A binding protein 1 [Source:MGI Symbol;Acc:MGI:107564]	Nab1	-0.564892	0	-0.508602	0	-0.841678	0	-0.839044	0
phosphatidylinositol transfer protein, alpha [Source:MGI Symbol;Acc:MGI:99887]	Pitpna	-0.289813	0.9871	-0.239455	1	-0.469819	0.0001	-0.836352	0
3'-phosphoadenosine 5'-phosphosulfate synthase 1 [Source:MGI Symbol;Acc:MGI:1330587]	Papss1	0.386094	0.0013	0.101596	1	-0.589713	0	-0.83586	0
zinc finger and BTB domain containing 41 homolog [Source:MGI Symbol;Acc:MGI:2444487]	Zbtb41	0.00538561	1	-0.160314	1	-0.915808	0	-0.834938	0
RIKEN cDNA 2610301G19 gene [Source:MGI Symbol;Acc:MGI:2444228]	2610301G19Rik	-0.327252	0.2687	-0.470325	0	-0.658868	0.0086	-0.834887	0
bifunctional apoptosis regulator [Source:MGI Symbol;Acc:MGI:1914368]	Bfar	-0.599788	0	0.141014	1	-0.582045	0	-0.833038	0
tumor necrosis factor receptor superfamily, member 1b [Source:MGI Symbol;Acc:MGI:1314883]	Tnfrsf1b	-0.626489	0	-0.266358	1	-0.165742	1	-0.832609	0
cytochrome P450, family 51 [Source:MGI Symbol;Acc:MGI:106040]	Cyp51	-1.1564	0	-2.54523	0	-0.688411	0	-0.830791	0
transcription factor 19 [Source:MGI Symbol;Acc:MGI:103180]	Tcf19	-2.11387	0	-2.97458	0	-0.858298	0	-0.828721	0
phosphatidylinositol 3 kinase, regulatory subunit, polypeptide 3 (p55) [Source:MGI Symbol;Acc:MGI:109277]	Pik3r3	-0.916804	0	-0.457062	0.0712	-0.376124	0.0001	-0.827208	0
carbohydrate sulfotransferase 12 [Source:MGI Symbol;Acc:MGI:1929064]	Chst12	0.263828	0.6928	1.14487	0	-0.70682	0	-0.826742	0
transmembrane protein 109 [Source:MGI Symbol;Acc:MGI:1915789]	Tmem109	-0.530575	0	-1.19506	0	-0.747236	0	-0.825279	0
Yip1 domain family, member 6 [Source:MGI Symbol;Acc:MGI:1925179]	Yipf6	-0.0720535	1	-0.368845	0.0341	-0.961137	0	-0.825274	0
cytokine receptor-like factor 3 [Source:MGI Symbol;Acc:MGI:1860086]	Crlf3	0.825142	0	0.729261	0	-1.05592	0	-0.825072	0
catenin (cadherin associated protein), alpha-like 1 [Source:MGI Symbol;Acc:MGI:1859649]	Ctnnal1	-1.13149	0	-1.41756	0	-0.652037	0	-0.824561	0
phosphoglycerate kinase 1 [Source:MGI Symbol;Acc:MGI:97555]	Pgk1	-0.371215	0.9968	-1.54901	0	-0.213792	1	-0.823215	0.0405
predicted gene 14296 [Source:MGI Symbol;Acc:MGI:3708667]	Gm14296	-0.207325	1	-0.494162	1	-1.29646	0	-0.82321	0
PHD finger protein 6 [Source:MGI Symbol;Acc:MGI:1918248]	Phf6	-0.889161	0	-1.8485	0	-0.853462	0	-0.821922	0
amylo-1,6-glucosidase, 4-alpha-glucanotransferase [Source:MGI Symbol;Acc:MGI:1924809]	Agl	-0.506699	0	-0.547185	0	-0.561539	0	-0.821368	0
proteasome (prosome, macropain) subunit, alpha type 3 [Source:MGI Symbol;Acc:MGI:104883]	Psma3	-0.568003	0	-1.57019	0	-0.676784	0	-0.816256	0
procollagen C-endopeptidase enhancer protein [Source:MGI Symbol;Acc:MGI:105099]	Pcolce	-0.465647	0.5502	-0.66813	0	-0.355706	0.0419	-0.815603	0
DPH3 homolog (KTI11, S. cerevisiae) [Source:MGI Symbol;Acc:MGI:1922658]	Dph3	-0.0555898	1	-0.586896	0	-0.629775	0	-0.815291	0
protein phosphatase 1B, magnesium dependent, beta isoform [Source:MGI Symbol;Acc:MGI:101841]	Ppm1b	1.10168	0	0.935709	0	-0.734652	0	-0.814098	0
nuclear transcription factor-Y alpha [Source:MGI Symbol;Acc:MGI:97316]	Nfya	-0.911213	0	-0.950113	0	-0.625812	0	-0.813697	0
T cell receptor alpha constant [Source:MGI Symbol;Acc:MGI:4439838]	Trac	-1.11883	0	-1.74574	0	-0.78306	0	-0.813517	0
cytoplasmic polyadenylation element binding protein 4 [Source:MGI Symbol;Acc:MGI:1914829]	Cpeb4	0.191057	1	1.02096	0	-0.643281	0	-0.813345	0
PHD finger protein 20-like 1 [Source:MGI Symbol;Acc:MGI:2444412]	Phf20l1	-0.395039	0.0001	-0.613957	0.0005	-0.495992	0	-0.813096	0
zinc finger CCHC-type and RNA binding motif 1 [Source:MGI Symbol;Acc:MGI:1914447]	Zcrb1	0.245593	0.9886	-0.0158642	1	-1.00119	0	-0.812774	0
NFKB activating protein [Source:MGI Symbol;Acc:MGI:1914300]	Nkap	0.276556	1	-0.0175645	1	-0.963785	0	-0.812524	0
family with sequence similarity 109, member A [Source:MGI Symbol;Acc:MGI:2442708]	Fam109a	1.34675	0	2.08592	0	-0.638903	0.0007	-0.812275	0
aftiphilin [Source:MGI Symbol;Acc:MGI:1923012]	Aftph	0.427381	0.173	0.63671	0	-0.724392	0	-0.811852	0
vesicle-associated membrane protein 7 [Source:MGI Symbol;Acc:MGI:1096399]	Vamp7	0.86047	0	1.14103	0	-0.938113	0	-0.811675	0
prostaglandin D2 synthase (brain) [Source:MGI Symbol;Acc:MGI:99261]	Ptgds	-0.324536	0.3586	-0.423598	0	-0.153965	1	-0.81166	0
ribosomal protein S12 [Source:MGI Symbol;Acc:MGI:98105]	Rps12	-0.776815	0.9157	-1.77639	0	-0.440894	0	-0.809914	0
transmembrane and ubiquitin-like domain containing 2 [Source:MGI Symbol;Acc:MGI:1919303]	Tmub2	0.323359	0.0782	0.774798	0	-0.470323	0	-0.80915	0
ER degradation enhancer, mannosidase alpha-like 1 [Source:MGI Symbol;Acc:MGI:2180139]	Edem1	0.116298	1	-0.480967	0	-0.697574	0.0013	-0.808809	0
Rho guanine nucleotide exchange factor (GEF) 12 [Source:MGI Symbol;Acc:MGI:1916882]	Arhgef12	1.08263	0	0.807866	0	-0.762647	0	-0.808771	0
ribosome binding protein 1 [Source:MGI Symbol;Acc:MGI:1932395]	Rrbp1	-1.11653	0	-0.997178	0	-0.416722	0.0303	-0.808599	0
EH-domain containing 2 [Source:MGI Symbol;Acc:MGI:2154274]	Ehd2	-1.01899	0	-0.868437	0	-0.200092	1	-0.807662	0
tribbles homolog 2 (Drosophila) [Source:MGI Symbol;Acc:MGI:2145021]	Trib2	-0.270728	1	-0.392056	1	-0.18237	1	-0.807157	0
golgi SNAP receptor complex member 1 [Source:MGI Symbol;Acc:MGI:1858260]	Gosr1	0.387969	0.0003	0.411318	0.0001	-0.728696	0	-0.806867	0
leucine rich repeat containing 56 [Source:MGI Symbol;Acc:MGI:1917802]	Lrrc56	-0.317184	1	-0.60517	0.0002	-0.514206	0.0585	-0.804307	0
IKAROS family zinc finger 5 [Source:MGI Symbol;Acc:MGI:1914393]	Ikzf5	-0.389534	0.0028	-0.831954	0	-0.719595	0	-0.804269	0
sorting nexing 24 [Source:MGI Symbol;Acc:MGI:1916476]	Snx24	-0.419451	0.0001	-0.822646	0	-0.866736	0	-0.803934	0
sorting nexing 24 [Source:MGI Symbol;Acc:MGI:1916476]	Snx24	-0.388854	0.0016	-0.768165	0	-0.688509	0	-0.802844	0
gap junction protein, alpha 1 [Source:MGI Symbol;Acc:MGI:95713]	Gja1	0.421253	0.0001	-1.21564	0	-0.714683	0	-0.802409	0
adenosine deaminase, RNA-specific, B1 [Source:MGI Symbol;Acc:MGI:891999]	Adarb1	-0.570996	0.0003	-0.119698	1	-0.521146	0	-0.801456	0
ubiquitin-like modifier activating enzyme 1 [Source:MGI Symbol;Acc:MGI:98890]	Uba1	0.0299122	1	-0.0529084	1	-0.745348	0	-0.801325	0
ring finger protein 181 [Source:MGI Symbol;Acc:MGI:1913760]	Rnf181	0.329353	0.4974	0.971759	0	-0.768106	0	-0.799649	0
trichorhinophalangeal syndrome I (human) [Source:MGI Symbol;Acc:MGI:1927616]	Trps1	1.0732	0	0.708426	0.0867	-0.231027	1	-0.799282	0
vang-like 2 (van gogh, Drosophila) [Source:MGI Symbol;Acc:MGI:2135272]	Vangl2	0.0259785	1	-0.0729395	1	-0.801357	0	-0.798743	0
aftiphilin [Source:MGI Symbol;Acc:MGI:1923012]	Aftph	0.401598	0.0001	0.819938	0	-0.896877	0	-0.797574	0
echinoderm microtubule associated protein like 1 [Source:MGI Symbol;Acc:MGI:1915769]	Eml1	-1.03378	0	-1.85251	0	-0.372343	0.8298	-0.796959	0
glutaredoxin 2 (thioltransferase) [Source:MGI Symbol;Acc:MGI:1916617]	Glrx2	0.066537	1	0.0715156	1	-0.803257	0	-0.796405	0
cell division cycle 6 [Source:MGI Symbol;Acc:MGI:1345150]	Cdc6	-2.49668	0	-2.96589	0	-0.73903	0	-0.794893	0
amyotrophic lateral sclerosis 2 (juvenile) [Source:MGI Symbol;Acc:MGI:1921268]	Als2	-0.145401	1	-0.625104	0	-0.602742	0	-0.793207	0
protein O-linked mannose beta1,2-N-acetylglucosaminyltransferase [Source:MGI Symbol;Acc:MGI:1915523]	Pomgnt1	-0.448692	0.0012	-0.507856	0	-0.633394	0	-0.791785	0
BTG3 associated nuclear protein [Source:MGI Symbol;Acc:MGI:1889023]	Banp	-0.154564	1	0.391383	0	-0.0650518	1	-0.790938	0
gem (nuclear organelle) associated protein 8 [Source:MGI Symbol;Acc:MGI:2384300]	Gemin8	0.0236386	1	-0.362559	0.0016	-0.654034	0	-0.790342	0
solute carrier family 7 (cationic amino acid transporter, y+ system), member 6 [Source:MGI Symbol;Acc:MGI:2142598]	Slc7a6	-0.157655	1	-0.298834	0.9993	-0.836558	0	-0.788766	0
mediator of RNA polymerase II transcription, subunit 19 homolog (yeast) [Source:MGI Symbol;Acc:MGI:1914234]	Med19	-0.292067	0.6644	-0.209578	1	-0.735709	0	-0.786209	0
regulator of chromosome condensation (RCC1) and BTB (POZ) domain containing protein 2 [Source:MGI Symbol;Acc:MGI:1917200]	Rcbtb2	-0.10435	1	-0.793852	0	-0.529389	0	-0.785517	0
ataxin 3 [Source:MGI Symbol;Acc:MGI:1099442]	Atxn3	0.888601	0	1.03072	0	-0.850306	0	-0.785171	0
NADH dehydrogenase (ubiquinone) 1 alpha subcomplex, assembly factor 3 [Source:MGI Symbol;Acc:MGI:1913956]	Ndufaf3	-0.272114	0.9849	-0.682916	0	-0.555808	0	-0.783062	0
cytochrome P450, family 51 [Source:MGI Symbol;Acc:MGI:106040]	Cyp51	-1.07415	0	-2.5734	0	-0.626778	0	-0.780567	0
fatty acid binding protein 3, muscle and heart [Source:MGI Symbol;Acc:MGI:95476]	Fabp3	-0.0172462	1	-0.635582	0	-0.181356	1	-0.78025	0
sialophorin [Source:MGI Symbol;Acc:MGI:98384]	Spn	0.648245	0	0.783783	0.0008	-0.388499	1	-0.779905	0
caveolin 1, caveolae protein [Source:MGI Symbol;Acc:MGI:102709]	Cav1	1.20749	0	1.93092	0	-1.15569	0	-0.779167	0
DPH3 homolog (KTI11, S. cerevisiae) [Source:MGI Symbol;Acc:MGI:1922658]	Dph3	0.15339	1	-0.0241072	1	-1.0857	0	-0.779133	0
BCL2/adenovirus E1B 19kD interacting protein like [Source:MGI Symbol;Acc:MGI:2384749]	Bnipl	-0.513658	0.0835	-0.686571	0	-0.0721854	1	-0.778855	0
two pore channel 1 [Source:MGI Symbol;Acc:MGI:2182472]	Tpcn1	-0.226632	1	-0.66472	0	-0.197792	1	-0.778652	0
programmed cell death 6 interacting protein [Source:MGI Symbol;Acc:MGI:1333753]	Pdcd6ip	-0.333696	0.0012	-0.619251	0.0005	-0.820861	0	-0.77812	0
hexamethylene bis-acetamide inducible 1 [Source:MGI Symbol;Acc:MGI:2385923]	Hexim1	0.423836	0.0051	0.804508	0	-0.472735	0.126	-0.776283	0
TNF receptor associated factor 4 [Source:MGI Symbol;Acc:MGI:1202880]	Traf4	-0.141101	1	-0.119111	1	-0.813454	0	-0.776059	0
BBSome interacting protein 1 [Source:MGI Symbol;Acc:MGI:1913610]	Bbip1	1.75839	0	1.87996	0	-0.120884	1	-0.774868	0
superoxide dismutase 3, extracellular [Source:MGI Symbol;Acc:MGI:103181]	Sod3	-1.09738	1	-0.724063	0.0011	-0.188901	1	-0.774402	0.0315
erythrocyte protein band 4.1-like 4b [Source:MGI Symbol;Acc:MGI:1859149]	Epb4.1l4b	-0.824173	0	-0.956538	0	-0.29355	0.0599	-0.774217	0
7-dehydrocholesterol reductase [Source:MGI Symbol;Acc:MGI:1298378]	Dhcr7	-1.431	0	-2.27479	0	-0.583409	0	-0.773341	0
POC1 centriolar protein homolog B (Chlamydomonas) [Source:MGI Symbol;Acc:MGI:1918511]	Poc1b	-0.376556	0.0043	-1.31025	0	-1.00444	0	-0.773082	0
atlastin GTPase 2 [Source:MGI Symbol;Acc:MGI:1929492]	Atl2	-0.634688	0	-1.1774	0	-0.861739	0	-0.771961	0
protein phosphatase 1, catalytic subunit, alpha isoform [Source:MGI Symbol;Acc:MGI:103016]	Ppp1ca	-0.0623287	1	-0.0206946	1	-0.541395	0	-0.771476	0
zinc finger, DHHC domain containing 20 [Source:MGI Symbol;Acc:MGI:1923215]	Zdhhc20	0.51	0.0012	0.470688	0	-0.868379	0	-0.771069	0
cytochrome c oxidase, subunit VIIc [Source:MGI Symbol;Acc:MGI:103226]	Cox7c	0.0412991	1	-0.243248	0.9981	-0.781301	0	-0.769308	0
UBX domain protein 8 [Source:MGI Symbol;Acc:MGI:1337129]	Ubxn8	-0.102546	1	-0.516122	0	-0.033763	1	-0.768526	0
phosphatase and tensin homolog [Source:MGI Symbol;Acc:MGI:109583]	Pten	-1.0588	0	-1.98045	0	-0.653187	0	-0.768253	0
GA repeat binding protein, alpha [Source:MGI Symbol;Acc:MGI:95610]	Gabpa	-0.480591	0	-1.13749	0	-0.838853	0	-0.767202	0
DEAD (Asp-Glu-Ala-Asp) box polypeptide 54 [Source:MGI Symbol;Acc:MGI:1919240]	Ddx54	-0.327863	0.9707	0.143041	1	-0.747388	0	-0.764744	0
transmembrane and coiled-coil domains 1 [Source:MGI Symbol;Acc:MGI:1921173]	Tmco1	-0.0933449	1	0.340745	0.0521	-0.619654	0	-0.764712	0
chemokine (C-X3-C motif) ligand 1 [Source:MGI Symbol;Acc:MGI:1097153]	Cx3cl1	0.234624	0.912	1.1641	0	-0.210563	1	-0.763761	0
cyclin-dependent kinase inhibitor 3 [Source:MGI Symbol;Acc:MGI:1919641]	Cdkn3	-0.275551	0.2139	-3.46427	0	-0.512458	0	-0.763624	0
MyoD family inhibitor domain containing [Source:MGI Symbol;Acc:MGI:104611]	Mdfic	1.48408	0	1.84634	0	-0.747115	0	-0.761475	0
mitochondrial ribosomal protein L49 [Source:MGI Symbol;Acc:MGI:108180]	Mrpl49	-0.721404	0	-1.31944	0	-0.585761	0	-0.761404	0
poly(A) binding protein interacting protein 2B [Source:MGI Symbol;Acc:MGI:2386865]	Paip2b	-0.164795	1	-0.666318	0	-0.77183	0	-0.761264	0
SYS1 Golgi-localized integral membrane protein homolog (S. cerevisiae) [Source:MGI Symbol;Acc:MGI:1913710]	Sys1	-0.663819	0	-0.869907	0	-0.689595	0	-0.760348	0
protein phosphatase 1, regulatory (inhibitor) subunit 7 [Source:MGI Symbol;Acc:MGI:1913635]	Ppp1r7	-0.500242	0.0015	-0.966878	0	-0.730131	0	-0.760223	0
sterile alpha motif domain containing 9-like [Source:MGI Symbol;Acc:MGI:1343184]	Samd9l	-0.48754	0.0012	1.02458	0	-0.156199	1	-0.759903	0
frizzled homolog 2 (Drosophila) [Source:MGI Symbol;Acc:MGI:1888513]	Fzd2	-0.273066	0.5863	-0.493792	0	-0.578305	0	-0.759796	0
cyclin-dependent kinase 7 [Source:MGI Symbol;Acc:MGI:102956]	Cdk7	-0.237333	1	-0.0310334	1	-0.735312	0	-0.759713	0
BCL2/adenovirus E1B 19kD interacting protein like [Source:MGI Symbol;Acc:MGI:2384749]	Bnipl	-0.419864	0.0001	-0.562591	0	-0.0745368	1	-0.759651	0
MOCO sulphurase C-terminal domain containing 2 [Source:MGI Symbol;Acc:MGI:1914497]	Mosc2	0.749723	0	1.38567	0	-0.417049	0.0772	-0.759383	0
N-glycanase 1 [Source:MGI Symbol;Acc:MGI:1913276]	Ngly1	0.478941	0	0.619676	0	-0.382145	0.47	-0.758433	0
LAG1 homolog, ceramide synthase 6 [Source:MGI Symbol;Acc:MGI:2442564]	Lass6	-1.05034	0.0001	-1.42034	0	-0.747395	0	-0.758089	0.0002
cytokine receptor-like factor 3 [Source:MGI Symbol;Acc:MGI:1860086]	Crlf3	0.803665	0	0.682438	0	-0.949895	0	-0.757816	0
malic enzyme 1, NADP(+)-dependent, cytosolic [Source:MGI Symbol;Acc:MGI:97043]	Me1	0.186006	1	-0.0215159	1	-0.73917	0	-0.755398	0
family with sequence similarity 117, member B [Source:MGI Symbol;Acc:MGI:1920000]	Fam117b	0.236193	1	-0.00179583	1	-0.527835	0.001	-0.75457	0
ubiquitin-conjugating enzyme E2Q (putative) 1 [Source:MGI Symbol;Acc:MGI:1917343]	Ube2q1	-0.295429	0.0649	-0.789673	0	-0.539253	0	-0.754234	0
RPTOR independent companion of MTOR, complex 2 [Source:MGI Symbol;Acc:MGI:1926007]	Rictor	1.26906	0	1.43392	0	-0.572647	0	-0.754198	0
family with sequence similarity 105, member B [Source:MGI Symbol;Acc:MGI:3577015]	Fam105b	0.0675561	1	0.0343566	1	-0.773413	0	-0.75367	0
insulin-like growth factor 2 mRNA binding protein 1 [Source:MGI Symbol;Acc:MGI:1890357]	Igf2bp1	0.312584	0.9974	0.696759	0	-0.311214	1	-0.750914	0.0287
NIPA-like domain containing 2 [Source:MGI Symbol;Acc:MGI:1924488]	Nipal2	-0.573252	0	0.199185	0.9998	-0.452244	0	-0.750557	0
RAN guanine nucleotide release factor [Source:MGI Symbol;Acc:MGI:1889073]	Rangrf	-0.382331	1	-1.13388	0	-0.556977	0	-0.750436	0.0028
polymerase (RNA) II (DNA directed) polypeptide E [Source:MGI Symbol;Acc:MGI:1913670]	Polr2e	-0.124512	1	-0.217615	1	-0.613469	0	-0.747328	0
COX15 homolog, cytochrome c oxidase assembly protein (yeast) [Source:MGI Symbol;Acc:MGI:1920112]	Cox15	-0.237153	1	-0.193884	1	-0.998959	0	-0.746998	0
alpha fetoprotein [Source:MGI Symbol;Acc:MGI:87951]	Afp	-0.407903	0.9998	-0.334091	0.6432	-1.21309	0	-0.745609	0.5229
coiled-coil and C2 domain containing 1B [Source:MGI Symbol;Acc:MGI:2443076]	Cc2d1b	0.0305056	1	-0.0383144	1	-0.659442	0	-0.745597	0
transforming growth factor beta regulated gene 4 [Source:MGI Symbol;Acc:MGI:1100868]	Tbrg4	-0.321923	1	-0.621892	0	-0.56672	0	-0.745113	0
transmembrane protein 20 [Source:MGI Symbol;Acc:MGI:2444789]	Tmem20	-0.718177	0	-1.07284	0	-0.813958	0	-0.744485	0
MOB kinase activator 3B [Source:MGI Symbol;Acc:MGI:2664539]	Mob3b	-0.682187	0	-1.00165	0	-0.705775	0	-0.744422	0
caspase 2 [Source:MGI Symbol;Acc:MGI:97295]	Casp2	-0.121367	1	-0.0433694	1	-0.584986	0	-0.744296	0
single-stranded DNA binding protein 3 [Source:MGI Symbol;Acc:MGI:1919725]	Ssbp3	-0.545125	0	-0.438294	0	-0.2998	0.9956	-0.743243	0.578
apelin [Source:MGI Symbol;Acc:MGI:1353624]	Apln	-0.652006	0.1415	-1.06606	0	-0.998204	0	-0.743026	0.395
microrchidia 4 [Source:MGI Symbol;Acc:MGI:1922996]	Morc4	0.395238	0.0054	-0.196851	1	-0.433834	0.0006	-0.743014	0
CTD (carboxy-terminal domain, RNA polymerase II, polypeptide A) small phosphatase like 2 [Source:MGI Symbol;Acc:MGI:1196405]	Ctdspl2	-0.449708	0.0001	-0.549369	0.0005	-0.79193	0	-0.742861	0
protein kinase C, alpha [Source:MGI Symbol;Acc:MGI:97595]	Prkca	-0.738941	0	-0.325868	0.0633	-0.875722	0	-0.742299	0
BCL2-like 11 (apoptosis facilitator) [Source:MGI Symbol;Acc:MGI:1197519]	Bcl2l11	0.817983	0	1.05971	0	-0.235107	0.9956	-0.742275	0
SRY-box containing gene 11 [Source:MGI Symbol;Acc:MGI:98359]	Sox11	-2.22219	0	-2.64393	0	-0.758899	0	-0.742239	0
acyl-CoA synthetase long-chain family member 3 [Source:MGI Symbol;Acc:MGI:1921455]	Acsl3	-1.07606	0	-1.7025	0	-0.716742	0	-0.742002	0
solute carrier family 7 (cationic amino acid transporter, y+ system), member 7 [Source:MGI Symbol;Acc:MGI:1337120]	Slc7a7	3.27844	0	3.48745	0	-0.25131	1	-0.741635	0.0003
bora, aurora kinase A activator [Source:MGI Symbol;Acc:MGI:1924994]	Bora	-1.3685	0	-2.36004	0	-0.377651	0	-0.740847	0
1-acylglycerol-3-phosphate O-acyltransferase 4 (lysophosphatidic acid acyltransferase, delta) [Source:MGI Symbol;Acc:MGI:1915512]	Agpat4	0.993631	0	1.49708	0	-0.654322	0	-0.740413	0
ectonucleotide pyrophosphatase/phosphodiesterase 4 [Source:MGI Symbol;Acc:MGI:2682634]	Enpp4	-1.0096	0	-1.21806	0	-0.756714	0	-0.740102	0
DEAD (Asp-Glu-Ala-Asp) box polypeptide 46 [Source:MGI Symbol;Acc:MGI:1920895]	Ddx46	-0.03934	1	-0.462569	0	-0.458626	0	-0.739329	0
ash2 (absent, small, or homeotic)-like (Drosophila) [Source:MGI Symbol;Acc:MGI:1344416]	Ash2l	-0.250818	0.9996	-0.0291228	1	-0.708241	0	-0.739235	0
SET domain containing 2 [Source:MGI Symbol;Acc:MGI:1918177]	Setd2	-0.209865	1	0.262084	0.9975	-0.841999	0	-0.739119	0
helicase with zinc finger domain [Source:MGI Symbol;Acc:MGI:1925705]	Helz	0.755503	0	1.13373	0	-0.475425	0	-0.738864	0
dystroglycan 1 [Source:MGI Symbol;Acc:MGI:101864]	Dag1	-0.246817	0.9998	-0.443656	0	-0.440622	0	-0.738676	0
follistatin [Source:MGI Symbol;Acc:MGI:95586]	Fst	-0.505111	0.0048	-1.5985	0	-0.73176	0	-0.737819	0
schlafen 9 [Source:MGI Symbol;Acc:MGI:2445121]	Slfn9	-1.09243	0	-1.58874	0	-0.495162	0	-0.737555	0
dystroglycan 1 [Source:MGI Symbol;Acc:MGI:101864]	Dag1	-0.19611	1	-0.446966	0	-0.374589	0.0002	-0.73678	0
polymerase (RNA) II (DNA directed) polypeptide E [Source:MGI Symbol;Acc:MGI:1913670]	Polr2e	-0.122	1	-0.287901	0.7226	-0.670419	0	-0.736687	0
mitogen-activated protein kinase 13 [Source:MGI Symbol;Acc:MGI:1346864]	Mapk13	-0.167112	1	-0.153238	1	-0.72124	0	-0.735471	0
atlastin GTPase 3 [Source:MGI Symbol;Acc:MGI:1924270]	Atl3	1.07253	0	1.8562	0	-0.553432	0	-0.735387	0
transcriptional regulating factor 1 [Source:MGI Symbol;Acc:MGI:2442086]	Trerf1	-0.0933249	1	-0.576721	0	-0.517443	0.7384	-0.735156	0
1-acylglycerol-3-phosphate O-acyltransferase 4 (lysophosphatidic acid acyltransferase, delta) [Source:MGI Symbol;Acc:MGI:1915512]	Agpat4	1.02423	0	1.50336	0	-0.588259	0.0024	-0.734189	0
SIK family kinase 3 [Source:MGI Symbol;Acc:MGI:2446296]	Sik3	0.92622	0	0.46047	0.2207	-0.397881	0	-0.734121	0
microtubule-associated protein 1B [Source:MGI Symbol;Acc:MGI:1306778]	Mtap1b	-0.822069	0	-1.17569	0	-0.761592	0	-0.733078	0
microtubule-associated protein 6 [Source:MGI Symbol;Acc:MGI:1201690]	Mtap6	-0.894539	0	-0.701199	0	-0.716337	0	-0.732637	0.01
RAB1B, member RAS oncogene family [Source:MGI Symbol;Acc:MGI:1923558]	Rab1b	-0.0304306	1	-0.0525089	1	-0.826502	0	-0.731673	0
signal peptide peptidase like 2A [Source:MGI Symbol;Acc:MGI:1913802]	Sppl2a	0.120763	1	0.172782	1	-0.613238	0	-0.731158	0
Rap guanine nucleotide exchange factor (GEF)-like 1 [Source:MGI Symbol;Acc:MGI:3611446]	Rapgefl1	-0.112166	1	-0.18695	1	-0.346401	0.0036	-0.730601	0
Casitas B-lineage lymphoma [Source:MGI Symbol;Acc:MGI:88279]	Cbl	0.154544	1	0.635764	0	-0.638773	0	-0.729746	0
speckle-type POZ protein-like [Source:MGI Symbol;Acc:MGI:1924107]	Spopl	-0.359905	0.9497	-0.864153	0	-0.832249	0	-0.729079	0
Protein Gm20091 [Source:UniProtKB/TrEMBL;Acc:J3QNB4]	GM20091	-0.0120229	1	-0.321975	0.0076	-0.601658	0	-0.726451	0
cell division cycle 6 [Source:MGI Symbol;Acc:MGI:1345150]	Cdc6	-1.24761	0	-1.74397	0	-0.870461	0	-0.725627	0
ataxin 1-like [Source:MGI Symbol;Acc:MGI:3694797]	Atxn1l	0.307149	0.2446	0.712886	0	-0.707178	0	-0.724221	0
mitogen-activated protein kinase kinase 3 [Source:MGI Symbol;Acc:MGI:1346868]	Map2k3	-0.670199	0	-0.668155	0	-0.313845	0.9826	-0.723987	0
jumonji, AT rich interactive domain 2 [Source:MGI Symbol;Acc:MGI:104813]	Jarid2	0.124447	1	0.0757243	1	-0.539912	0	-0.723982	0
La ribonucleoprotein domain family, member 4B [Source:MGI Symbol;Acc:MGI:106330]	Larp4b	0.10126	1	0.432585	0.0178	-0.609594	0	-0.723453	0
ribosomal protein L22 [Source:MGI Symbol;Acc:MGI:99262]	Rpl22	-0.483989	0	-1.28209	0	-0.732337	0	-0.723449	0
spermine synthase [Source:MGI Symbol;Acc:MGI:109490]	Sms	-0.061401	1	-0.987981	0	-0.457259	0.0075	-0.722784	0
lysosomal-associated protein transmembrane 4B [Source:MGI Symbol;Acc:MGI:1890494]	Laptm4b	-0.505144	0	-0.443001	0.0076	-0.752527	0	-0.720923	0
leucine-rich repeat-containing G protein-coupled receptor 6 [Source:MGI Symbol;Acc:MGI:2441805]	Lgr6	-0.568011	0	-0.421958	0.0007	-0.185422	1	-0.720745	0
AHNAK nucleoprotein (desmoyokin) [Source:MGI Symbol;Acc:MGI:1316648]	Ahnak	0.0611264	1	-0.413634	0.0019	-0.333487	0.8475	-0.720488	0
Tia1 cytotoxic granule-associated RNA binding protein-like 1 [Source:MGI Symbol;Acc:MGI:107913]	Tial1	-1.00668	0	-1.47182	0	-0.403307	0.0015	-0.719704	0
SRY-box containing gene 11 [Source:MGI Symbol;Acc:MGI:98359]	Sox11	-2.31684	0	-2.5049	0	-0.670961	0	-0.719124	0
serine/threonine kinase 24 [Source:MGI Symbol;Acc:MGI:2385007]	Stk24	0.657238	0	0.235984	0.9962	-0.535798	0	-0.718315	0
RIKEN cDNA B230118H07 gene [Source:MGI Symbol;Acc:MGI:1915420]	B230118H07Rik	0.0591476	1	-0.893317	0	-0.73654	0	-0.717684	0
caspase 9 [Source:MGI Symbol;Acc:MGI:1277950]	Casp9	-0.135315	1	0.0126402	1	-0.719405	0	-0.71668	0.0002
RIKEN cDNA E130309D02 gene [Source:MGI Symbol;Acc:MGI:2442621]	E130309D02Rik	-0.24191	1	-0.691581	0	-0.661821	0	-0.716491	0
procollagen-proline, 2-oxoglutarate 4-dioxygenase (proline 4-hydroxylase), alpha 1 polypeptide [Source:MGI Symbol;Acc:MGI:97463]	P4ha1	-0.910369	0	-1.79232	0	-0.461249	0	-0.716375	0
zinc finger protein 828 [Source:MGI Symbol;Acc:MGI:1196398]	Zfp828	-0.012116	1	-0.0886735	1	-0.481374	0.0004	-0.716095	0.0067
lysine-rich coiled-coil 1 [Source:MGI Symbol;Acc:MGI:1889377]	Krcc1	0.532915	0	0.863502	0	-0.298948	0.0149	-0.715562	0
cell wall biogenesis 43 C-terminal homolog (S. cerevisiae) [Source:MGI Symbol;Acc:MGI:2444131]	Cwh43	2.03256	0	2.65632	0	-0.278839	0.7256	-0.715417	0
anaphase promoting complex subunit 11 [Source:MGI Symbol;Acc:MGI:1913406]	Anapc11	0.100507	1	0.230068	1	-0.753016	0	-0.713064	0
matrix-remodelling associated 8 [Source:MGI Symbol;Acc:MGI:1922011]	Mxra8	1.30665	0	2.35722	0	-0.115755	1	-0.712717	0
checkpoint with forkhead and ring finger domains [Source:MGI Symbol;Acc:MGI:2444898]	Chfr	1.26451	0	1.41858	0	-0.449314	0	-0.711469	0
acetyl-Coenzyme A acyltransferase 1B [Source:MGI Symbol;Acc:MGI:3605455]	Acaa1b	0.24896	0.8914	0.603027	0	-0.56931	0	-0.711271	0
7-dehydrocholesterol reductase [Source:MGI Symbol;Acc:MGI:1298378]	Dhcr7	-1.18991	0	-1.78794	0	-0.335754	1	-0.710751	0.0014
integrator complex subunit 12 [Source:MGI Symbol;Acc:MGI:1919043]	Ints12	0.463832	0	0.538409	0.004	-0.5747	0	-0.707831	0
polycystic kidney disease 2 [Source:MGI Symbol;Acc:MGI:1099818]	Pkd2	-0.482986	0	-0.843324	0	-0.61502	0	-0.707668	0
expressed sequence C77080 [Source:MGI Symbol;Acc:MGI:2140651]	C77080	0.0741766	1	0.697436	0	-0.710541	0	-0.706481	0
malic enzyme 1, NADP(+)-dependent, cytosolic [Source:MGI Symbol;Acc:MGI:97043]	Me1	0.128227	1	-0.2587	0.1832	-0.865945	0	-0.705745	0
histone deacetylase 6 [Source:MGI Symbol;Acc:MGI:1333752]	Hdac6	-0.455766	0	-0.37009	0.0006	-0.505074	0	-0.705502	0
zinc finger with KRAB and SCAN domains 1 [Source:MGI Symbol;Acc:MGI:1921820]	Zkscan1	-0.274967	0.4428	0.544594	0	-0.423847	0.0029	-0.704068	0
predicted gene 11507 [Source:MGI Symbol;Acc:MGI:3650927]	Gm11507	1.32816	0	1.07825	0	-0.547491	0	-0.70352	0
low density lipoprotein receptor [Source:MGI Symbol;Acc:MGI:96765]	Ldlr	-1.05692	0	-1.95658	0	-0.981648	0	-0.703274	0
acyl-Coenzyme A dehydrogenase, short/branched chain [Source:MGI Symbol;Acc:MGI:1914135]	Acadsb	1.81652	0	2.86502	0	-0.612765	0	-0.703262	0
myosin, heavy polypeptide 9, non-muscle [Source:MGI Symbol;Acc:MGI:107717]	Myh9	0.0355395	1	0.791014	0	-0.563516	0	-0.703114	0
microtubule-associated protein 1 light chain 3 beta [Source:MGI Symbol;Acc:MGI:1914693]	Map1lc3b	2.10522	0	2.78132	0	-0.308021	0.0063	-0.702539	0
thymoma viral proto-oncogene 3 [Source:MGI Symbol;Acc:MGI:1345147]	Akt3	0.981999	0	0.932129	0	-0.454117	0	-0.701522	0
thioredoxin interacting protein [Source:MGI Symbol;Acc:MGI:1889549]	Txnip	0.577044	0.9905	2.22613	0	0.0692347	1	-0.700249	0.012
receptor accessory protein 3 [Source:MGI Symbol;Acc:MGI:88930]	Reep3	0.257747	1	-0.139782	1	-0.529693	0	-0.699469	0
NADH dehydrogenase (ubiquinone) 1, alpha/beta subcomplex, 1 [Source:MGI Symbol;Acc:MGI:1917566]	Ndufab1	-0.279033	0.8402	-0.454724	0	-0.448926	0.0001	-0.698829	0
zinc finger protein 362 [Source:MGI Symbol;Acc:MGI:2652839]	Zfp362	0.163048	1	0.102322	1	-0.414655	1	-0.698558	0
lysine-rich coiled-coil 1 [Source:MGI Symbol;Acc:MGI:1889377]	Krcc1	0.56307	0	0.888126	0	-0.311327	0.9997	-0.69684	0
protease, serine, 27 [Source:MGI Symbol;Acc:MGI:2450123]	Prss27	-0.901893	0	-0.63756	0.0208	0.0846766	1	-0.695774	0.0039
fibroblast growth factor binding protein 1 [Source:MGI Symbol;Acc:MGI:1096350]	Fgfbp1	0.234379	0.9992	-0.4634	0.2179	-0.583467	0	-0.694779	0
G patch domain containing 2 [Source:MGI Symbol;Acc:MGI:1915019]	Gpatch2	0.375835	0.0005	0.998809	0	-0.521832	0	-0.694492	0
vesicle-associated membrane protein, associated protein B and C [Source:MGI Symbol;Acc:MGI:1928744]	Vapb	0.273325	1	-0.16347	1	-0.54969	0	-0.693887	0.9934
solute carrier organic anion transporter family, member 2a1 [Source:MGI Symbol;Acc:MGI:1346021]	Slco2a1	-0.97418	0	0.905312	0	-0.299876	0.0905	-0.693451	0
protein phosphatase methylesterase 1 [Source:MGI Symbol;Acc:MGI:1919840]	Ppme1	0.156306	1	0.420412	0.0005	-0.449072	0.3055	-0.692854	0
UTP15, U3 small nucleolar ribonucleoprotein, homolog (yeast) [Source:MGI Symbol;Acc:MGI:2145443]	Utp15	-0.650431	0	-0.966323	0	-0.736603	0	-0.691793	0
transmembrane protein 60 [Source:MGI Symbol;Acc:MGI:2673965]	Tmem60	0.0756695	1	0.484643	0	-0.897541	0	-0.691511	0
prenylcysteine oxidase 1 [Source:MGI Symbol;Acc:MGI:1914131]	Pcyox1	-0.28749	0.1026	0.231961	1	-0.883755	0	-0.690859	0
serine/arginine-rich splicing factor 10 [Source:MGI Symbol;Acc:MGI:1333805]	Srsf10	-0.529745	0	-0.94685	0	-0.582754	0	-0.689958	0
serine incorporator 2 [Source:MGI Symbol;Acc:MGI:1919132]	Serinc2	-0.102348	1	-0.206945	1	-0.265854	0.3217	-0.689153	0.0002
RB1-inducible coiled-coil 1 [Source:MGI Symbol;Acc:MGI:1341850]	Rb1cc1	1.64234	0	1.8686	0	-0.279342	1	-0.687869	0.0002
chaperonin containing Tcp1, subunit 8 (theta) [Source:MGI Symbol;Acc:MGI:107183]	Cct8	-0.359427	0.0109	-0.920573	0	-0.7598	0	-0.686455	0
zinc finger CCCH-type containing 4 [Source:MGI Symbol;Acc:MGI:2682314]	Zc3h4	0.22488	1	0.185448	1	-0.557176	0	-0.68486	0
cDNA sequence AK010878 [Source:MGI Symbol;Acc:MGI:4845848]	AK010878	-0.361033	0.4212	-0.24546	0.9141	-0.579404	0	-0.68429	0
RIKEN cDNA 2310008H09 gene [Source:MGI Symbol;Acc:MGI:1913606]	2310008H09Rik	-0.596248	0.0001	-0.647095	0	-0.537456	0	-0.683778	0
peptidyl arginine deiminase, type IV [Source:MGI Symbol;Acc:MGI:1338898]	Padi4	-0.37754	1	-0.705312	0	-0.362436	1	-0.683465	0.006
CTD (carboxy-terminal domain, RNA polymerase II, polypeptide A) small phosphatase like 2 [Source:MGI Symbol;Acc:MGI:1196405]	Ctdspl2	-0.374475	0.9963	-0.504598	0	-0.625396	0	-0.682488	0
guanine nucleotide binding protein (G protein), gamma 12 [Source:MGI Symbol;Acc:MGI:1336171]	Gng12	0.707701	0	0.698805	0	-0.707244	0	-0.682309	0
glyoxylate reductase 1 homolog (Arabidopsis) [Source:MGI Symbol;Acc:MGI:1921272]	Glyr1	0.537942	0	0.795301	0	-0.415878	0.0015	-0.681229	0
splicing factor proline/glutamine rich (polypyrimidine tract binding protein associated) [Source:MGI Symbol;Acc:MGI:1918764]	Sfpq	-0.364894	0.0054	-1.18315	0	-0.19631	1	-0.68016	0
nuclear factor of activated T cells 5 [Source:MGI Symbol;Acc:MGI:1859333]	Nfat5	0.485417	0.0185	0.0954789	1	-0.156378	1	-0.6801	0
SLIT-ROBO Rho GTPase activating protein 3 [Source:MGI Symbol;Acc:MGI:2152938]	Srgap3	-0.0967365	1	0.193292	1	0.0257801	1	-0.679957	0.3422
sulfatase modifying factor 1 [Source:MGI Symbol;Acc:MGI:1889844]	Sumf1	0.413973	0	1.62059	0	-0.436463	0	-0.679672	0
hydroxyacyl-Coenzyme A dehydrogenase [Source:MGI Symbol;Acc:MGI:96009]	Hadh	-0.162239	1	-0.829339	0	-0.679843	0	-0.679081	0
zinc finger protein 324 [Source:MGI Symbol;Acc:MGI:2444641]	Zfp324	-0.463716	0.0017	-0.473659	0.6738	-0.467252	0	-0.679058	0
pygopus 2 [Source:MGI Symbol;Acc:MGI:1916161]	Pygo2	-0.318687	0.2319	-0.228283	1	-0.568811	0	-0.678529	0
zinc finger protein 672 [Source:MGI Symbol;Acc:MGI:2442105]	Zfp672	0.276771	1	0.544149	0.528	0.115792	1	-0.678261	0
tubulin, alpha 1C [Source:MGI Symbol;Acc:MGI:1095409]	Tuba1c	-1.07363	0	-1.48673	0	-0.803919	0	-0.67728	0.0003
fucosidase, alpha-L- 1, tissue [Source:MGI Symbol;Acc:MGI:95593]	Fuca1	0.429118	0.0003	1.5162	0	-0.463056	0	-0.676351	0
fucokinase [Source:MGI Symbol;Acc:MGI:1916071]	Fuk	-0.101211	1	0.111833	1	-0.527165	0	-0.674466	0
GTP binding protein 3 [Source:MGI Symbol;Acc:MGI:1917609]	Gtpbp3	-0.69477	0	-0.355562	0.7332	-0.661825	0	-0.67364	0
glucoside xylosyltransferase 1 [Source:MGI Symbol;Acc:MGI:2684933]	Gxylt1	-0.641466	0	-0.935445	0	-0.544092	0	-0.673414	0
retinol binding protein 1, cellular [Source:MGI Symbol;Acc:MGI:97876]	Rbp1	0.35009	0.0003	0.810484	0	-0.454075	0	-0.6726	0
choline dehydrogenase [Source:MGI Symbol;Acc:MGI:1860776]	Chdh	-0.391389	0.459	-0.0650684	1	-0.479315	0.0011	-0.672559	0.7958
leukotriene A4 hydrolase [Source:MGI Symbol;Acc:MGI:96836]	Lta4h	-0.312344	0.4009	-0.869752	0	-0.590382	0	-0.672336	0
killer cell lectin-like receptor, subfamily A, member 6 [Source:MGI Symbol;Acc:MGI:101902]	Klra6	-0.961061	0	-1.41467	0	-0.187142	1	-0.671513	0.029
matrix metallopeptidase 14 (membrane-inserted) [Source:MGI Symbol;Acc:MGI:101900]	Mmp14	-0.373765	0.1137	-0.0344159	1	-0.343154	0.0041	-0.671214	0.0002
hepatocyte growth factor activator [Source:MGI Symbol;Acc:MGI:1859281]	Hgfac	-0.24553	1	-0.794197	0	-0.0121174	1	-0.670452	0.0002
lipoma HMGIC fusion partner [Source:MGI Symbol;Acc:MGI:1920048]	Lhfp	-0.514223	0	-1.30931	0	-0.665235	0	-0.668409	0
ATP-binding cassette, sub-family F (GCN20), member 2 [Source:MGI Symbol;Acc:MGI:1351657]	Abcf2	-0.838675	0	-1.04301	0	-0.618803	0.0043	-0.667587	0
kelch domain containing 5 [Source:MGI Symbol;Acc:MGI:2444786]	Klhdc5	0.0411168	1	0.35277	0.0258	-0.465305	0	-0.667027	0
high mobility group nucleosomal binding domain 1 [Source:MGI Symbol;Acc:MGI:96120]	Hmgn1	-0.338517	0.003	-1.16224	0	-0.464632	0	-0.666824	0
ER degradation enhancer, mannosidase alpha-like 1 [Source:MGI Symbol;Acc:MGI:2180139]	Edem1	0.0121968	1	-0.446128	0	-0.601553	0	-0.666198	0
aminoacylase 1 [Source:MGI Symbol;Acc:MGI:87913]	Acy1	-0.41584	0.0054	-1.24666	0	-0.887054	0	-0.665919	0
canopy 4 homolog (zebrafish) [Source:MGI Symbol;Acc:MGI:1913705]	Cnpy4	0.00743952	1	0.300885	0.9687	-0.574334	0.0001	-0.665498	0
calpain 7 [Source:MGI Symbol;Acc:MGI:1338030]	Capn7	0.441622	0	0.684621	0	-0.765016	0	-0.664585	0
ankyrin repeat domain 13c [Source:MGI Symbol;Acc:MGI:2139746]	Ankrd13c	0.896605	0	1.55431	0	-0.473444	0.026	-0.663136	0
family with sequence similarity 188, member A [Source:MGI Symbol;Acc:MGI:1914210]	Fam188a	0.25631	0.1903	-0.229464	1	-0.485604	0	-0.663013	0
UBX domain protein 2A [Source:MGI Symbol;Acc:MGI:2442310]	Ubxn2a	0.723803	0	1.02318	0	-0.624377	0	-0.662835	0
ubiquitin-conjugating enzyme E2I [Source:MGI Symbol;Acc:MGI:107365]	Ube2i	-0.651308	0	-0.878894	0	-0.354735	0.0001	-0.662469	0
microtubule-associated protein 1 light chain 3 beta [Source:MGI Symbol;Acc:MGI:1914693]	Map1lc3b	1.86312	0	2.65195	0	-0.255665	0.5644	-0.662435	0
DCN1, defective in cullin neddylation 1, domain containing 1 (S. cerevisiae) [Source:MGI Symbol;Acc:MGI:2150386]	Dcun1d1	-0.158297	1	-0.261962	0.257	-0.809357	0	-0.661547	0
predicted gene, 17296 [Source:MGI Symbol;Acc:MGI:4936930]	Gm17296	-0.382425	0.0003	-1.0907	0	-0.679508	0	-0.661524	0
AT rich interactive domain 2 (ARID, RFX-like) [Source:MGI Symbol;Acc:MGI:1924294]	Arid2	1.01498	0	1.02799	0	-0.483997	0	-0.661102	0
activating transcription factor 6 [Source:MGI Symbol;Acc:MGI:1926157]	Atf6	0.0435965	1	-0.054638	1	-0.51786	0.0072	-0.660694	0.9996
heterogeneous nuclear ribonucleoprotein D-like [Source:MGI Symbol;Acc:MGI:1355299]	Hnrpdl	-0.570259	0	-1.17229	0	-0.562461	0	-0.660516	0
canopy 4 homolog (zebrafish) [Source:MGI Symbol;Acc:MGI:1913705]	Cnpy4	-0.0298959	1	0.326365	0.3948	-0.502918	0	-0.660356	0
jumonji, AT rich interactive domain 2 [Source:MGI Symbol;Acc:MGI:104813]	Jarid2	0.128703	1	0.0259785	1	-0.410064	0.7459	-0.660005	0
Rpgrip1-like [Source:MGI Symbol;Acc:MGI:1920563]	Rpgrip1l	1.12076	1	1.49365	0	-0.320455	0.9981	-0.659522	0
ArfGAP with coiled-coil, ankyrin repeat and PH domains 2 [Source:MGI Symbol;Acc:MGI:1925868]	Acap2	0.169617	1	0.278389	0.1064	-0.682562	0	-0.65944	0
dynein light chain LC8-type 1 [Source:MGI Symbol;Acc:MGI:1861457]	Dynll1	-0.751404	0	-0.525403	0.0706	-0.398028	0	-0.659322	0
MOCO sulphurase C-terminal domain containing 2 [Source:MGI Symbol;Acc:MGI:1914497]	Mosc2	0.611616	0	1.21568	0	-0.19158	1	-0.659201	0
regulation of nuclear pre-mRNA domain containing 1A [Source:MGI Symbol;Acc:MGI:2385066]	Rprd1a	-0.184349	1	-0.0557187	1	-0.350339	0.7407	-0.659073	0
predicted gene 11507 [Source:MGI Symbol;Acc:MGI:3650927]	Gm11507	1.25216	0	0.909374	0	-0.676718	0	-0.658895	0
expressed sequence C78339 [Source:MGI Symbol;Acc:MGI:2145496]	C78339	1.25836	0	1.41552	0	-0.663193	0	-0.658882	0
jumonji C domain-containing histone demethylase 1 homolog D (S. cerevisiae) [Source:MGI Symbol;Acc:MGI:2443388]	Jhdm1d	2.16213	0	2.36131	0	-0.364335	1	-0.658515	0
CTD (carboxy-terminal domain, RNA polymerase II, polypeptide A) small phosphatase like 2 [Source:MGI Symbol;Acc:MGI:1196405]	Ctdspl2	-0.285495	0.56	-0.535033	0	-0.68946	0	-0.658062	0
circadian locomotor output cycles kaput [Source:MGI Symbol;Acc:MGI:99698]	Clock	0.0369464	1	-0.0808277	1	-0.591653	0	-0.657331	0
sphingomyelin synthase 2 [Source:MGI Symbol;Acc:MGI:1921692]	Sgms2	1.32004	0	1.2734	0	-0.423395	0.0042	-0.655562	0
retinoid X receptor alpha [Source:MGI Symbol;Acc:MGI:98214]	Rxra	-0.0281721	1	-0.207374	1	-0.321454	0.1901	-0.655401	0
anoctamin 8 [Source:MGI Symbol;Acc:MGI:2687327]	Ano8	0.332221	0.0468	0.840564	0	-0.38532	0.1316	-0.655226	0
cDNA sequence BC048507 [Source:MGI Symbol;Acc:MGI:3040680]	BC048507	-0.752644	0	-0.718445	0.1154	-0.380099	0	-0.65449	0
B cell leukemia/lymphoma 2 [Source:MGI Symbol;Acc:MGI:88138]	Bcl2	-0.173503	1	-0.032672	1	-0.567522	0	-0.653791	0
poly (ADP-ribose) polymerase family, member 9 [Source:MGI Symbol;Acc:MGI:1933117]	Parp9	0.28545	0.1254	2.46847	0	-0.46561	0.1044	-0.653362	0
family with sequence similarity 164, member A [Source:MGI Symbol;Acc:MGI:1914556]	Fam164a	0.488278	0.0015	-0.0799339	1	-1.11364	0	-0.653201	0
RIKEN cDNA 2010002N04 gene [Source:MGI Symbol;Acc:MGI:1917088]	2010002N04Rik	-1.38981	0	-1.73612	0	-1.19787	0	-0.653115	0
lysosomal-associated protein transmembrane 4B [Source:MGI Symbol;Acc:MGI:1890494]	Laptm4b	-0.516592	0	-0.375689	0.0006	-0.83056	0	-0.652727	0
ubiquitin protein ligase E3A [Source:MGI Symbol;Acc:MGI:105098]	Ube3a	0.33666	0.0394	0.204316	1	-0.6199	0.0001	-0.652668	0
SH2B adaptor protein 3 [Source:MGI Symbol;Acc:MGI:893598]	Sh2b3	-1.3783	0	-1.44695	0	-0.515381	0	-0.651833	0
circadian locomotor output cycles kaput [Source:MGI Symbol;Acc:MGI:99698]	Clock	0.332427	1	0.178237	1	-0.743803	0	-0.651346	0
peptidyl arginine deiminase, type IV [Source:MGI Symbol;Acc:MGI:1338898]	Padi4	-0.473038	0	-0.775098	0	-0.447387	0	-0.65083	0
guanylate-binding protein 8 [Source:MGI Symbol;Acc:MGI:1923324]	Gbp8	-0.412182	1	1.63296	0	-0.0400904	1	-0.64996	0.0001
microsomal glutathione S-transferase 3 [Source:MGI Symbol;Acc:MGI:1913697]	Mgst3	0.353933	0.2341	0.273026	0.2498	-0.215737	1	-0.649768	0
Rho GTPase activating protein 18 [Source:MGI Symbol;Acc:MGI:1921160]	Arhgap18	0.809645	0	0.965566	0	-0.568456	0	-0.648042	0
post-GPI attachment to proteins 1 [Source:MGI Symbol;Acc:MGI:2443342]	Pgap1	-0.552298	0	-0.514085	0.0105	-0.288137	1	-0.64801	0.4174
heat shock protein 1B [Source:MGI Symbol;Acc:MGI:99517]	Hspa1b	-0.875349	0	-0.122119	1	-0.606057	0	-0.647847	0
WW domain binding protein 1 [Source:MGI Symbol;Acc:MGI:104710]	Wbp1	0.078883	1	0.42276	0.0002	-0.360112	0.0029	-0.647481	0
cingulin-like 1 [Source:MGI Symbol;Acc:MGI:1915428]	Cgnl1	-0.626605	0	-0.560017	0	-0.478408	0	-0.64588	0
cytochrome b5 reductase 1 [Source:MGI Symbol;Acc:MGI:1919267]	Cyb5r1	-0.774621	0	-1.51961	0	-0.934309	0	-0.64578	0
radixin [Source:MGI Symbol;Acc:MGI:97887]	Rdx	-0.214369	1	-0.954865	0	-0.54973	0	-0.645688	0
ubiquitin-conjugating enzyme E2E 3 [Source:MGI Symbol;Acc:MGI:107412]	Ube2e3	0.313826	0.0239	0.0690422	1	-0.765594	0	-0.645586	0
serine/arginine-rich splicing factor 2 [Source:MGI Symbol;Acc:MGI:98284]	Srsf2	-1.72226	0	-2.0674	0	-0.258639	0.7186	-0.644975	0
phospholipid scramblase 4 [Source:MGI Symbol;Acc:MGI:2143267]	Plscr4	1.17149	0	1.01737	0	-0.520598	0	-0.644657	0
PHD finger protein 21A [Source:MGI Symbol;Acc:MGI:2384756]	Phf21a	0.1149	1	0.492448	0.004	-0.467152	0.0148	-0.644406	0.0001
histone cluster 1, H2ai [Source:MGI Symbol;Acc:MGI:2448457]	Hist1h2ai	-1.31307	0	-3.52126	0	0.00805655	1	-0.644395	0
fibronectin type III domain containing 3B [Source:MGI Symbol;Acc:MGI:1919257]	Fndc3b	-0.150374	1	0.387903	0.0047	-0.458985	0	-0.642802	0
glucocorticoid receptor DNA binding factor 1 [Source:MGI Symbol;Acc:MGI:1929494]	Grlf1	-0.00447496	1	0.0432325	1	-0.72894	0	-0.642443	0
ribosomal protein L13 [Source:MGI Symbol;Acc:MGI:105922]	Rpl13	-0.241557	0.9846	-0.188707	1	-0.546583	0	-0.642317	0.8273
phospholipase C, gamma 2 [Source:MGI Symbol;Acc:MGI:97616]	Plcg2	0.321351	0.2054	0.634946	0	-0.450317	0	-0.641088	0
V-set and immunoglobulin domain containing 10 [Source:MGI Symbol;Acc:MGI:2448533]	Vsig10	0.762561	0	1.16987	0	-0.369171	0.0032	-0.641073	0
suppressor of defective silencing 3 homolog (S. cerevisiae) [Source:MGI Symbol;Acc:MGI:1919204]	Suds3	1.84028	0	1.75217	0	-0.325389	0.1051	-0.640657	0
tissue inhibitor of metalloproteinase 1 [Source:MGI Symbol;Acc:MGI:98752]	Timp1	-1.26048	0	-2.61695	0	-0.491912	0.0057	-0.640389	0
N-myristoyltransferase 1 [Source:MGI Symbol;Acc:MGI:102579]	Nmt1	-0.559348	0	-0.725584	0	-0.612721	0	-0.639011	0
staufen (RNA binding protein) homolog 2 (Drosophila) [Source:MGI Symbol;Acc:MGI:1352508]	Stau2	-0.38543	0.003	-0.696707	0	-0.353465	0.076	-0.63858	0
heat shock protein 4 [Source:MGI Symbol;Acc:MGI:1342292]	Hspa4	-1.16702	0	-0.676095	0	-0.452542	0	-0.638533	0
S100 calcium binding protein A6 (calcyclin) [Source:MGI Symbol;Acc:MGI:1339467]	S100a6	0.211448	1	1.30628	0	-0.441217	0.9986	-0.63706	0.3806
phosphatidylinositol glycan anchor biosynthesis, class N [Source:MGI Symbol;Acc:MGI:1351629]	Pign	-0.161169	1	-0.260788	1	-0.677197	0	-0.636093	0
matrix metallopeptidase 14 (membrane-inserted) [Source:MGI Symbol;Acc:MGI:101900]	Mmp14	-0.407163	0.9838	0.015312	1	-0.508042	0	-0.635766	0.0006
protein phosphatase methylesterase 1 [Source:MGI Symbol;Acc:MGI:1919840]	Ppme1	0.0848126	1	0.39708	0.0147	-0.440759	0	-0.635333	0
phosphofructokinase, liver, B-type [Source:MGI Symbol;Acc:MGI:97547]	Pfkl	-0.625425	0.0001	-1.64948	0	-0.0399792	1	-0.635201	0.0101
interferon regulatory factor 2 binding protein 2 [Source:MGI Symbol;Acc:MGI:2443921]	Irf2bp2	-0.757167	0	-0.721002	0	-0.421488	0	-0.635015	0
heterogeneous nuclear ribonucleoprotein D [Source:MGI Symbol;Acc:MGI:101947]	Hnrnpd	-0.926624	0	-1.80241	0	-0.213624	0.9998	-0.634576	0
mediator of RNA polymerase II transcription, subunit 19 homolog (yeast) [Source:MGI Symbol;Acc:MGI:1914234]	Med19	-0.0898507	1	0.0457924	1	-0.635558	0	-0.634359	0
PHD finger protein 14 [Source:MGI Symbol;Acc:MGI:1923539]	Phf14	-0.198932	1	0.0404717	1	-0.589027	0	-0.634222	0
abhydrolase domain containing 13 [Source:MGI Symbol;Acc:MGI:1916154]	Abhd13	0.167923	1	0.199474	1	-0.547447	0.068	-0.633334	0.0024
cell division cycle 26 [Source:MGI Symbol;Acc:MGI:1913690]	Cdc26	0.300686	0.0228	0.175301	1	-0.406027	0.0024	-0.633063	0
family with sequence similarity 176, member B [Source:MGI Symbol;Acc:MGI:1922063]	Fam176b	-0.0874068	1	0.258205	0.5407	-0.259865	1	-0.631444	0
zinc finger, matrin-like [Source:MGI Symbol;Acc:MGI:1203484]	Zfml	0.311503	0.1543	0.0900133	1	-0.396679	0.001	-0.631169	0
receptor accessory protein 3 [Source:MGI Symbol;Acc:MGI:88930]	Reep3	0.287756	0.6718	-0.284414	0.2335	-0.531517	0.0001	-0.631073	0.0004
BCL2-associated athanogene 2 [Source:MGI Symbol;Acc:MGI:1891254]	Bag2	-1.39757	0	-1.67192	0	-0.683402	0	-0.630671	0
solute carrier family 4, sodium bicarbonate cotransporter, member 7 [Source:MGI Symbol;Acc:MGI:2443878]	Slc4a7	-0.305375	0.1287	-1.517	0	-0.50882	0	-0.630276	0
spermidine synthase [Source:MGI Symbol;Acc:MGI:102690]	Srm	-1.9127	0	-2.51902	0	-0.612302	0	-0.629999	0
MyoD family inhibitor domain containing [Source:MGI Symbol;Acc:MGI:104611]	Mdfic	1.51155	0	1.77439	0	-0.715258	0	-0.628921	0
hippocalcin-like 1 [Source:MGI Symbol;Acc:MGI:1855689]	Hpcal1	-0.379909	0.1519	-1.207	0	-0.316291	0.1236	-0.628901	0.0001
voltage-dependent anion channel 2 [Source:MGI Symbol;Acc:MGI:106915]	Vdac2	0.0310564	1	-0.085339	1	-0.653108	0	-0.628508	0
histone cell cycle regulation defective homolog A (S. cerevisiae) [Source:MGI Symbol;Acc:MGI:99430]	Hira	-0.20232	1	-0.683678	0	-0.694212	0	-0.62802	0
pleckstrin homology domain containing, family A (phosphoinositide binding specific) member 8 [Source:MGI Symbol;Acc:MGI:2681164]	Plekha8	0.164349	1	-0.284991	1	-0.383746	0.0399	-0.627839	0
heparan sulfate 6-O-sulfotransferase 1 [Source:MGI Symbol;Acc:MGI:1354958]	Hs6st1	-2.07151	0	-2.24621	0	-0.714278	0	-0.627757	0
zinc finger, matrin-like [Source:MGI Symbol;Acc:MGI:1203484]	Zfml	0.440346	0.0001	0.13808	1	-0.428143	0	-0.627202	0
methyl-CpG binding domain protein 5 [Source:MGI Symbol;Acc:MGI:2138934]	Mbd5	0.689648	0	2.65225	0	-0.0953533	1	-0.62713	0
tissue inhibitor of metalloproteinase 1 [Source:MGI Symbol;Acc:MGI:98752]	Timp1	-1.19143	0	-2.39944	0	-0.389377	0.0004	-0.626667	0
solute carrier family 5 (inositol transporters), member 3 [Source:MGI Symbol;Acc:MGI:1858226]	Slc5a3	-0.371801	0.2005	-1.07167	0	-0.649557	0.0001	-0.626422	0.0002
platelet-activating factor acetylhydrolase, isoform 1b, subunit 1 [Source:MGI Symbol;Acc:MGI:109520]	Pafah1b1	-0.39406	0.0235	-0.597872	0	-0.374604	0.123	-0.625709	0
basonuclin 1 [Source:MGI Symbol;Acc:MGI:1097164]	Bnc1	-1.48414	0	-1.70372	0	-0.708342	0	-0.625649	0
differentially expressed in FDCP 6 [Source:MGI Symbol;Acc:MGI:1346328]	Def6	-0.412278	0.0012	-0.552569	0.0014	-0.463235	0.002	-0.624911	0.0002
RIKEN cDNA 0610007P08 gene [Source:MGI Symbol;Acc:MGI:1923501]	0610007P08Rik	-0.878268	0	-1.52458	0	-0.489911	0	-0.624799	0
E2F transcription factor 7 [Source:MGI Symbol;Acc:MGI:1289147]	E2f7	-1.66916	0	-3.6824	0	-0.759673	0	-0.622954	0
mitogen-activated protein kinase kinase 6 [Source:MGI Symbol;Acc:MGI:1346870]	Map2k6	-0.377613	0.2603	-0.863412	0	-0.167359	1	-0.62289	0.1164
protein kinase C, delta binding protein [Source:MGI Symbol;Acc:MGI:1923422]	Prkcdbp	-0.184579	1	-0.137218	1	-0.435251	0	-0.622805	0
calmodulin 1 [Source:MGI Symbol;Acc:MGI:88251]	Calm1	-0.0221589	1	-0.305164	0.268	-0.710564	0	-0.622174	0
ubiquitin protein ligase E3A [Source:MGI Symbol;Acc:MGI:105098]	Ube3a	0.424836	0.0016	0.235764	0.4661	-0.613361	0	-0.62167	0
receptor accessory protein 3 [Source:MGI Symbol;Acc:MGI:88930]	Reep3	0.28584	0.9998	-0.24482	0.7152	-0.427227	0.0045	-0.62142	0.0002
transmembrane 7 superfamily member 2 [Source:MGI Symbol;Acc:MGI:1920416]	Tm7sf2	-0.0795238	1	-0.626698	0	-0.347685	0.9963	-0.620483	0.4101
histone cluster 1, H2ao [Source:MGI Symbol;Acc:MGI:2448302]	Hist1h2ao	-1.35127	0	-3.55051	0	-0.0587179	1	-0.620361	0
interferon gamma receptor 1 [Source:MGI Symbol;Acc:MGI:107655]	Ifngr1	0.00446544	1	0.186374	1	-0.630535	0	-0.620326	0
solute carrier family 22. member 29 [Source:MGI Symbol;Acc:MGI:3605624]	Slc22a29	-0.485251	0.0001	-1.35504	0	-0.697846	0	-0.619767	0
RIKEN cDNA E130309D02 gene [Source:MGI Symbol;Acc:MGI:2442621]	E130309D02Rik	-0.896668	0	-1.18091	0	-0.690549	0	-0.619404	0
histone cluster 1, H2bc [Source:MGI Symbol;Acc:MGI:1915274]	Hist1h2bc	-0.178388	1	1.17109	0	-0.595766	0.0024	-0.619149	0.1332
ELMO/CED-12 domain containing 2 [Source:MGI Symbol;Acc:MGI:2445165]	Elmod2	-0.501038	0	-0.964824	0	-0.428917	0.2558	-0.618918	0.0001
cytoplasmic polyadenylation element binding protein 4 [Source:MGI Symbol;Acc:MGI:1914829]	Cpeb4	0.200015	1	1.00572	0	-0.207191	1	-0.618796	0
Vac14 homolog (S. cerevisiae) [Source:MGI Symbol;Acc:MGI:2157980]	Vac14	-0.410693	0.5163	-0.619716	0	-0.442173	0.0007	-0.61867	0.2576
mediator complex subunit 14 [Source:MGI Symbol;Acc:MGI:1349442]	Med14	-0.209829	1	-1.45109	0	-0.365721	0	-0.617884	0
pellino 1 [Source:MGI Symbol;Acc:MGI:1914495]	Peli1	0.813755	0	0.87338	0	-0.551086	0	-0.617722	0
ATP citrate lyase [Source:MGI Symbol;Acc:MGI:103251]	Acly	-0.556569	0.0001	-0.949965	0	-0.620191	0	-0.617021	0
ariadne ubiquitin-conjugating enzyme E2 binding protein homolog 1 (Drosophila) [Source:MGI Symbol;Acc:MGI:1344363]	Arih1	-0.0747966	1	-0.379128	0.21	-0.405365	0.0216	-0.617005	0
peptidyl arginine deiminase, type IV [Source:MGI Symbol;Acc:MGI:1338898]	Padi4	-0.396555	0.0003	-0.777	0	-0.42457	0	-0.616855	0
ash2 (absent, small, or homeotic)-like (Drosophila) [Source:MGI Symbol;Acc:MGI:1344416]	Ash2l	-0.201868	1	-0.0434719	1	-0.519971	0	-0.616454	0.0053
armadillo repeat containing 1 [Source:MGI Symbol;Acc:MGI:1921502]	Armc1	-0.250171	0.9998	-1.0148	0	-0.69989	0	-0.616412	0
tropomyosin 2, beta [Source:MGI Symbol;Acc:MGI:98810]	Tpm2	0.0815169	1	0.406014	0.0002	-0.219648	0.8937	-0.616275	0
zinc and ring finger 1 [Source:MGI Symbol;Acc:MGI:2177308]	Znrf1	-0.147403	1	-0.0668716	1	-0.328513	0.9855	-0.615851	0
RIKEN cDNA 2210408I21 gene [Source:MGI Symbol;Acc:MGI:1919621]	2210408I21Rik	-0.210391	1	-0.470355	0.0001	-0.577842	0	-0.615311	0
helicase, lymphoid specific [Source:MGI Symbol;Acc:MGI:106209]	Hells	-1.77572	0	-2.90134	0	-0.764839	0	-0.614299	0
adaptor-related protein complex AP-4, mu 1 [Source:MGI Symbol;Acc:MGI:1337063]	Ap4m1	-0.35152	0.0495	-0.515491	0	-0.241069	1	-0.613862	0
small nuclear ribonucleoprotein 40 (U5) [Source:MGI Symbol;Acc:MGI:1913835]	Snrnp40	-0.0219772	1	0.0967881	1	0.101516	1	-0.613759	1
heterogeneous nuclear ribonucleoprotein D-like [Source:MGI Symbol;Acc:MGI:1355299]	Hnrpdl	-0.800161	0	-1.25022	0	-0.570691	0	-0.61375	0
stearoyl-Coenzyme A desaturase 1 [Source:MGI Symbol;Acc:MGI:98239]	Scd1	-0.616326	0	-1.78935	0	-0.513473	0.0004	-0.613666	0
UBX domain protein 7 [Source:MGI Symbol;Acc:MGI:2146388]	Ubxn7	0.0568609	1	-0.0213665	1	-0.501018	0	-0.613445	0
slingshot homolog 1 (Drosophila) [Source:MGI Symbol;Acc:MGI:2686240]	Ssh1	0.435415	0.0012	1.2735	0	-0.32535	1	-0.613414	0
T cell receptor alpha constant [Source:MGI Symbol;Acc:MGI:4439838]	Trac	-0.922489	0	-1.31513	0	-0.437479	0.0004	-0.613414	0
periplakin [Source:MGI Symbol;Acc:MGI:1194898]	Ppl	-0.364468	0.0091	-0.362486	0.0105	-0.34424	0.0103	-0.613275	0
zinc finger protein 655 [Source:MGI Symbol;Acc:MGI:1919861]	Zfp655	1.34379	0	2.00092	0	-0.340678	0.0218	-0.61299	0
splA/ryanodine receptor domain and SOCS box containing 4 [Source:MGI Symbol;Acc:MGI:2183445]	Spsb4	-0.596106	0.0001	-0.727186	0	-0.364875	0.603	-0.612933	0
N(alpha)-acetyltransferase 40, NatD catalytic subunit, homolog (S. cerevisiae) [Source:MGI Symbol;Acc:MGI:1918249]	Naa40	-0.90644	0	-1.15151	0	-0.360245	0.0435	-0.612869	0
Rho-related BTB domain containing 3 [Source:MGI Symbol;Acc:MGI:1920546]	Rhobtb3	-0.925801	0	-1.39164	0	-0.90993	0	-0.612728	0
6-phosphofructo-2-kinase/fructose-2,6-biphosphatase 1 [Source:MGI Symbol;Acc:MGI:107816]	Pfkfb1	0.180517	1	-0.582741	0	-0.421475	0.0863	-0.612399	0.3305
interferon induced transmembrane protein 7 [Source:MGI Symbol;Acc:MGI:1921732]	Ifitm7	-0.240217	0.9985	0.391757	0.0018	-0.161314	1	-0.612382	0
S100 calcium binding protein A10 (calpactin) [Source:MGI Symbol;Acc:MGI:1339468]	S100a10	-0.154117	1	0.313826	0.0062	-0.175379	1	-0.61236	0
single-stranded DNA binding protein 3 [Source:MGI Symbol;Acc:MGI:1919725]	Ssbp3	-0.696786	0	-0.779306	0	-0.373738	1	-0.612196	0
AHNAK nucleoprotein (desmoyokin) [Source:MGI Symbol;Acc:MGI:1316648]	Ahnak	-0.0428491	1	0.0837376	1	-0.363867	0.9999	-0.61129	0
carnitine deficiency-associated gene expressed in ventricle 3 [Source:MGI Symbol;Acc:MGI:2448759]	Cdv3	-1.64827	0	-1.63202	0	-0.504514	0	-0.610872	0
RIKEN cDNA 1190005I06 gene [Source:MGI Symbol;Acc:MGI:1916168]	1190005I06Rik	-1.07259	0	-1.09865	0	-0.50217	0.0001	-0.610744	0
latent transforming growth factor beta binding protein 1 [Source:MGI Symbol;Acc:MGI:109151]	Ltbp1	0.403802	0.0044	1.0522	0	-0.212574	1	-0.610704	0
retinol binding protein 1, cellular [Source:MGI Symbol;Acc:MGI:97876]	Rbp1	0.339126	0.246	0.752115	0	-0.362653	0.0036	-0.610162	0
tyrosine kinase, non-receptor, 1 [Source:MGI Symbol;Acc:MGI:1930958]	Tnk1	0.166356	1	0.632035	0	-0.278365	1	-0.609958	0.0001
Ngfi-A binding protein 2 [Source:MGI Symbol;Acc:MGI:107563]	Nab2	-0.483706	0	-0.470303	0.9903	-0.252905	0.9958	-0.609588	0
regulation of nuclear pre-mRNA domain containing 1A [Source:MGI Symbol;Acc:MGI:2385066]	Rprd1a	-0.178945	1	0.0281165	1	-0.402758	0.0001	-0.609526	0
DPH3B, KTI11 homolog B (S. cerevisiae), pseudogene [Source:MGI Symbol;Acc:MGI:3647154]	Dph3b-ps	0.0205555	1	-0.303762	0.0144	-0.866329	0	-0.609374	0
RB1-inducible coiled-coil 1 [Source:MGI Symbol;Acc:MGI:1341850]	Rb1cc1	1.49052	0	2.37794	0	-0.177255	1	-0.609348	0
zinc finger, MYM-type 4 [Source:MGI Symbol;Acc:MGI:1915035]	Zmym4	-0.282333	0.43	-0.138022	1	-0.767096	0	-0.609264	0
transcription elongation factor B (SIII), polypeptide 3 [Source:MGI Symbol;Acc:MGI:1351315]	Tceb3	0.143433	1	0.393735	0.0377	-0.5799	0	-0.608903	0
cingulin-like 1 [Source:MGI Symbol;Acc:MGI:1915428]	Cgnl1	-0.616399	0	-0.608617	0	-0.450723	0	-0.60854	0
copine I [Source:MGI Symbol;Acc:MGI:2386621]	Cpne1	-0.234328	0.8598	0.260869	0.2251	-0.619703	0	-0.608538	0
enolase 3, beta muscle [Source:MGI Symbol;Acc:MGI:95395]	Eno3	-0.982597	0	-1.98086	0	-0.608281	0	-0.608362	0
family with sequence similarity 117, member B [Source:MGI Symbol;Acc:MGI:1920000]	Fam117b	0.534659	0	0.444466	0	-0.711769	0	-0.606832	0
dermatan sulfate epimerase-like [Source:MGI Symbol;Acc:MGI:2442948]	Dsel	0.852806	0	0.308582	0.4945	-0.1566	1	-0.606771	0.2178
tubulin, alpha 1A [Source:MGI Symbol;Acc:MGI:98869]	Tuba1a	-0.0434928	1	0.136021	1	-0.659164	0	-0.606489	0
interferon induced transmembrane protein 3 [Source:MGI Symbol;Acc:MGI:1913391]	Ifitm3	-0.455404	0.0001	0.578011	0	-0.171351	1	-0.605921	0
olfactory receptor 802 [Source:MGI Symbol;Acc:MGI:3030636]	Olfr802	-0.033543	1	-0.283871	0.9638	-0.203472	1	-0.60578	0.0002
BTB (POZ) domain containing 10 [Source:MGI Symbol;Acc:MGI:1916065]	Btbd10	-0.0319697	1	0.0584689	1	-0.734325	0	-0.6056	0
predicted pseudogene 6985 [Source:MGI Symbol;Acc:MGI:3644316]	Gm6985	-0.326881	0.003	-2.75395	0	-0.241734	0.4229	-0.605497	0
isocitrate dehydrogenase 1 (NADP+), soluble [Source:MGI Symbol;Acc:MGI:96413]	Idh1	0.324741	0.1457	-0.633099	0	-0.533629	0	-0.60531	0
WW domain containing adaptor with coiled-coil [Source:MGI Symbol;Acc:MGI:2387357]	Wac	0.273444	0.9974	0.00168697	1	-0.550896	0.002	-0.604746	0.0001
tryptophan rich basic protein [Source:MGI Symbol;Acc:MGI:2136882]	Wrb	-0.824035	0	-0.974444	0	-0.622343	0	-0.604711	0
RNA binding motif protein 47 [Source:MGI Symbol;Acc:MGI:2384294]	Rbm47	0.645268	0	0.00812829	1	-0.555872	0.0001	-0.604408	0
tetraspanin 3 [Source:MGI Symbol;Acc:MGI:1928098]	Tspan3	-0.82813	0	-2.18484	0	-0.414645	0	-0.602683	0
DCN1, defective in cullin neddylation 1, domain containing 1 (S. cerevisiae) [Source:MGI Symbol;Acc:MGI:2150386]	Dcun1d1	0.0416495	1	0.178938	1	-0.604753	0	-0.602221	0
abl-interactor 1 [Source:MGI Symbol;Acc:MGI:104913]	Abi1	0.588344	0	0.755101	0	-0.690582	0	-0.602173	0
E2F transcription factor 5 [Source:MGI Symbol;Acc:MGI:105091]	E2f5	-0.378464	0.022	-0.524485	0	-0.474895	0.0001	-0.601952	0
thyroid hormone receptor associated protein 3 [Source:MGI Symbol;Acc:MGI:2442637]	Thrap3	-0.114746	1	-0.340832	0.0062	-0.450496	0	-0.601755	0
TOPBP1-interacting checkpoint and replication regulator [Source:MGI Symbol;Acc:MGI:1924261]	Ticrr	-0.762519	0	-1.8044	0	-0.425298	0	-0.601374	0
histone cluster 1, H2ak [Source:MGI Symbol;Acc:MGI:2448297]	Hist1h2ak	-1.20871	0	-3.06095	0	-0.102331	1	-0.601205	0
heterogeneous nuclear ribonucleoprotein D [Source:MGI Symbol;Acc:MGI:101947]	Hnrnpd	-0.932964	0	-1.68581	0	-0.202637	1	-0.600943	0
polycystic kidney and hepatic disease 1 [Source:MGI Symbol;Acc:MGI:2155808]	Pkhd1	-0.467127	0.01	0.407614	0.8529	-0.459159	0.0001	-0.600282	0
H2A histone family, member X [Source:MGI Symbol;Acc:MGI:102688]	H2afx	-1.36866	0	-2.20246	0	-0.61578	0	-0.600181	0
atlastin GTPase 2 [Source:MGI Symbol;Acc:MGI:1929492]	Atl2	-0.241531	0.9998	-0.507107	0	-0.625974	0	-0.599744	0
recombination signal binding protein for immunoglobulin kappa J region [Source:MGI Symbol;Acc:MGI:96522]	Rbpj	0.176093	1	-0.397606	0	-0.452211	0.0001	-0.59948	0
POU domain, class 2, transcription factor 1 [Source:MGI Symbol;Acc:MGI:101898]	Pou2f1	0.320046	0.9998	0.0960864	1	-0.679097	0	-0.598138	0
predicted pseudogene 7125 [Source:MGI Symbol;Acc:MGI:3645829]	Gm7125	-0.360981	0.0022	-2.94868	0	-0.268975	0.4862	-0.598051	0
zinc finger protein 80 [Source:MGI Symbol;Acc:MGI:3704127]	Zfp808	-0.640029	0	-1.04673	0	-0.636845	0	-0.597597	0.001
solute carrier organic anion transporter family, member 2a1 [Source:MGI Symbol;Acc:MGI:1346021]	Slco2a1	-0.879024	0	1.07038	0	-0.132228	1	-0.59754	0
nurim (nuclear envelope membrane protein) [Source:MGI Symbol;Acc:MGI:2146855]	Nrm	-0.897697	0	-1.61983	0	-0.460086	0.0001	-0.597498	0
telomeric repeat binding factor 2, interacting protein [Source:MGI Symbol;Acc:MGI:1929871]	Terf2ip	-0.0957602	1	0.412554	0	-0.395967	0	-0.597418	0
myelin protein zero-like 3 [Source:MGI Symbol;Acc:MGI:2442647]	Mpzl3	-0.98046	0	-1.14466	0	-0.773506	0	-0.596573	0
programmed cell death 6 interacting protein [Source:MGI Symbol;Acc:MGI:1333753]	Pdcd6ip	-0.0298178	1	0.219512	0.9749	-0.615459	0	-0.595954	0.0001
eukaryotic translation initiation factor 5 [Source:MGI Symbol;Acc:MGI:95309]	Eif5	0.00936151	1	-0.614812	0	-0.261601	0.9319	-0.595875	0.0025
huntingtin interacting protein 1 [Source:MGI Symbol;Acc:MGI:1099804]	Hip1	0.552859	0.0001	0.68655	0	-0.219524	0.9305	-0.595624	0.2127
protease (prosome, macropain) 26S subunit, ATPase 1 [Source:MGI Symbol;Acc:MGI:106054]	Psmc1	-0.0373148	1	0.0248303	1	-0.559817	0	-0.595361	0
proteasome (prosome, macropain) inhibitor subunit 1 [Source:MGI Symbol;Acc:MGI:1346072]	Psmf1	0.156785	1	0.259881	1	-0.284389	0.9946	-0.595008	0
tetraspanin 3 [Source:MGI Symbol;Acc:MGI:1928098]	Tspan3	-0.8394	0	-2.40117	0	-0.383529	0	-0.594875	0
adaptor protein complex AP-1, mu 2 subunit [Source:MGI Symbol;Acc:MGI:1336974]	Ap1m2	0.315879	0.9998	0.889731	0	-0.35569	0.0001	-0.593999	0
membrane-associated ring finger (C3HC4) 6 [Source:MGI Symbol;Acc:MGI:2442773]	2006-03-01	0.555551	0.0001	0.375746	0.0663	-0.438325	0	-0.593165	0
activin receptor IIA [Source:MGI Symbol;Acc:MGI:102806]	Acvr2a	0.267692	0.5128	0.651086	0	-0.555339	0	-0.593089	0
serine/arginine-rich splicing factor 1 [Source:MGI Symbol;Acc:MGI:98283]	Srsf1	-1.16096	0	-1.9022	0	-0.0532197	1	-0.593065	0
carbonic anhydrase 5b, mitochondrial [Source:MGI Symbol;Acc:MGI:1926249]	Car5b	0.899879	0	0.507485	0.0017	-0.490835	0.1006	-0.592856	0.0016
sperm autoantigenic protein 17 [Source:MGI Symbol;Acc:MGI:1333778]	Spa17	1.53296	0	2.15196	0	-0.518602	0	-0.592277	0
GLI-Kruppel family member GLI3 [Source:MGI Symbol;Acc:MGI:95729]	Gli3	-0.558421	0.0001	-1.1205	0	-0.510628	0.1317	-0.592088	0
family with sequence similarity 188, member A [Source:MGI Symbol;Acc:MGI:1914210]	Fam188a	0.204667	1	-0.28098	0.0475	-0.358445	0.0029	-0.591523	0
ubiquitin-conjugating enzyme E2 variant 2 [Source:MGI Symbol;Acc:MGI:1917870]	Ube2v2	-0.475902	0.0484	-0.816324	0	-0.684406	0	-0.591373	0.0001
four and a half LIM domains 2 [Source:MGI Symbol;Acc:MGI:1338762]	Fhl2	0.341952	0.3663	1.11121	0	-0.763217	0	-0.590862	0
histocompatibility 2, T region locus 22 [Source:MGI Symbol;Acc:MGI:95956]	H2-T22	0.0169954	1	0.865943	0	-0.582547	0	-0.590549	0.0005
tubulin-specific chaperone E [Source:MGI Symbol;Acc:MGI:1917680]	Tbce	0.441335	0	0.474607	0	-0.390128	0	-0.590547	0
phosphoglycerate kinase 1 [Source:MGI Symbol;Acc:MGI:97555]	Pgk1	-0.474911	0.0009	-1.42973	0	-0.175861	1	-0.590291	0.4324
solute carrier family 35, member B2 [Source:MGI Symbol;Acc:MGI:1921086]	Slc35b2	-0.744337	0	-0.710083	0	-0.395682	0	-0.589639	0
receptor (calcitonin) activity modifying protein 1 [Source:MGI Symbol;Acc:MGI:1858418]	Ramp1	-0.0930925	1	-0.298987	0.5895	-0.0838047	1	-0.589331	0.5424
hydroxysteroid (17-beta) dehydrogenase 7 [Source:MGI Symbol;Acc:MGI:1330808]	Hsd17b7	-1.08106	0	-0.594631	0	-0.657573	0	-0.588914	0
NADH dehydrogenase (ubiquinone) 1, alpha/beta subcomplex, 1 [Source:MGI Symbol;Acc:MGI:1917566]	Ndufab1	-0.168546	1	0.198846	1	-0.459733	0	-0.588452	0
isocitrate dehydrogenase 2 (NADP+), mitochondrial [Source:MGI Symbol;Acc:MGI:96414]	Idh2	-0.184654	1	-0.802437	0	-0.339873	0.9937	-0.58804	0
phosphodiesterase 10A [Source:MGI Symbol;Acc:MGI:1345143]	Pde10a	0.0484315	1	0.233827	1	-0.30244	0.0014	-0.587899	0
acetyl-Coenzyme A acyltransferase 1B [Source:MGI Symbol;Acc:MGI:3605455]	Acaa1b	0.156694	1	0.521634	0	-0.384346	0.1231	-0.587804	0
interferon induced transmembrane protein 2 [Source:MGI Symbol;Acc:MGI:1933382]	Ifitm2	0.00738211	1	0.138408	1	-0.262429	0.2214	-0.586984	0
UDP-glucose pyrophosphorylase 2 [Source:MGI Symbol;Acc:MGI:2183447]	Ugp2	-0.165515	1	-0.32578	0.018	-0.366559	0	-0.586536	0
high mobility group nucleosomal binding domain 2 [Source:MGI Symbol;Acc:MGI:96136]	Hmgn2	-0.311564	0.0263	-2.85414	0	-0.144248	1	-0.585226	0
olfactory receptor 393 [Source:MGI Symbol;Acc:MGI:3030227]	Olfr393	0.088318	1	-0.0512392	1	0.0173803	1	-0.585087	1
ring finger protein 181 [Source:MGI Symbol;Acc:MGI:1913760]	Rnf181	0.364673	0.052	0.810863	0	-0.694711	0	-0.582756	0
potassium channel, subfamily K, member 7 [Source:MGI Symbol;Acc:MGI:1341841]	Kcnk7	-0.314921	0.1342	-0.327738	0.0944	-0.33856	0.0205	-0.582192	0
UDP-N-acetyl-alpha-D-galactosamine:polypeptide N-acetylgalactosaminyltransferase 12 [Source:MGI Symbol;Acc:MGI:2444664]	Galnt12	-0.240481	1	-0.66529	0	-0.475453	0.0622	-0.582169	0.0246
RIKEN cDNA 2310009B15 gene [Source:MGI Symbol;Acc:MGI:1916799]	2310009B15Rik	0.0271824	1	-0.584326	0	-0.356589	0.0052	-0.582153	0
phosphatidylinositol glycan anchor biosynthesis, class G [Source:MGI Symbol;Acc:MGI:3576484]	Pigg	-0.228157	1	-0.587923	0.043	-0.623759	0	-0.581894	0.0004
histone cluster 1, H2af [Source:MGI Symbol;Acc:MGI:2448309]	Hist1h2af	-1.1503	0	-2.66575	0	-0.0793347	1	-0.581769	0
neuron navigator 1 [Source:MGI Symbol;Acc:MGI:2183683]	Nav1	-0.447875	0.0015	-0.19576	1	-0.269775	0.9236	-0.580748	0.0002
solute carrier family 2 (facilitated glucose transporter), member 1 [Source:MGI Symbol;Acc:MGI:95755]	Slc2a1	-0.362019	0.0067	-0.357969	0.0072	-0.0655877	1	-0.580726	0
spermatid perinuclear RNA binding protein [Source:MGI Symbol;Acc:MGI:104626]	Strbp	-0.100363	1	-0.530285	0	-0.536587	0	-0.579409	0
mitogen-activated protein kinase kinase 6 [Source:MGI Symbol;Acc:MGI:1346870]	Map2k6	-0.344238	0.0224	-0.675169	0	-0.221448	1	-0.578762	0.0003
protein disulfide isomerase associated 4 [Source:MGI Symbol;Acc:MGI:104864]	Pdia4	-0.463386	0.0001	-0.703638	0	-0.610213	0	-0.578738	0
podocalyxin-like [Source:MGI Symbol;Acc:MGI:1351317]	Podxl	-1.48398	0	-2.73884	0	-0.404197	0	-0.578118	0
ubinuclein 2 [Source:MGI Symbol;Acc:MGI:2444236]	Ubn2	0.471572	0.0049	0.925923	0	-0.392457	0.0004	-0.57787	0
male-specific lethal 1 homolog (Drosophila) [Source:MGI Symbol;Acc:MGI:1921276]	Msl1	0.234415	0.9953	0.915544	0	-0.169566	1	-0.577773	0
stomatin [Source:MGI Symbol;Acc:MGI:95403]	Stom	0.324615	0.2197	0.243413	0.9771	-0.250929	1	-0.577614	0.0002
insulin receptor [Source:MGI Symbol;Acc:MGI:96575]	Insr	1.2594	0	1.142	0	-0.539278	0	-0.577586	0
TBC1 domain family, member 9B [Source:MGI Symbol;Acc:MGI:1924045]	Tbc1d9b	0.0128404	1	0.101677	1	-0.418786	0.0006	-0.577384	0
staufen (RNA binding protein) homolog 2 (Drosophila) [Source:MGI Symbol;Acc:MGI:1352508]	Stau2	-0.20729	1	0.0319597	1	-0.173894	1	-0.576943	0
epsin 2 [Source:MGI Symbol;Acc:MGI:1333766]	Epn2	-0.717949	0	-1.24489	0	-0.384576	0	-0.576936	0.0001
protein phosphatase 1, regulatory subunit 10 [Source:MGI Symbol;Acc:MGI:1289273]	Ppp1r10	0.210838	1	0.822681	0.0001	-0.349539	0.9801	-0.575996	1
ribosomal protein S6 kinase polypeptide 3 [Source:MGI Symbol;Acc:MGI:104557]	Rps6ka3	-0.544574	0	-0.95257	0	-0.412153	0.0007	-0.575497	0
secernin 3 [Source:MGI Symbol;Acc:MGI:1921866]	Scrn3	-0.141569	1	-0.479245	0.0011	-0.573617	0.0041	-0.574829	0.0001
transmembrane protein 161B [Source:MGI Symbol;Acc:MGI:1919995]	Tmem161b	-0.202104	1	-0.184764	1	-0.523351	0	-0.57436	0
suppressor of variegation 3-9 homolog 1 (Drosophila) [Source:MGI Symbol;Acc:MGI:1099440]	Suv39h1	-0.469134	0.0003	-1.83153	0	-0.473541	0	-0.574257	0
family with sequence similarity 32, member A [Source:MGI Symbol;Acc:MGI:1915172]	Fam32a	0.571881	0	0.586328	0	-0.379239	0.003	-0.574206	0
H2A histone family, member Y [Source:MGI Symbol;Acc:MGI:1349392]	H2afy	-0.154469	1	0.797727	0	-0.241879	1	-0.573883	0.0003
thiosulfate sulfurtransferase (rhodanese)-like domain containing 2 [Source:MGI Symbol;Acc:MGI:3039624]	Tstd2	0.138369	1	0.31934	0.0116	-0.401642	0.0001	-0.573673	0
nuclear transcription factor-Y alpha [Source:MGI Symbol;Acc:MGI:97316]	Nfya	-0.602639	0	-0.573173	0.0016	-0.571334	0	-0.572636	0.1695
histone cluster 3, H2a [Source:MGI Symbol;Acc:MGI:2448458]	Hist3h2a	-0.0445711	1	0.765586	0.0001	-0.450211	0.1186	-0.572299	0.0008
phosphofructokinase, muscle [Source:MGI Symbol;Acc:MGI:97548]	Pfkm	-0.0985519	1	-0.0092847	1	-0.315616	0.0493	-0.572291	0
nuclear factor I/X [Source:MGI Symbol;Acc:MGI:97311]	Nfix	0.203427	1	0.671502	0	-0.233481	0.3216	-0.57175	0
squalene epoxidase [Source:MGI Symbol;Acc:MGI:109296]	Sqle	-1.64683	0	-2.67052	0	-0.534429	0	-0.571551	0
polyadenylate binding protein-interacting protein 1 [Source:MGI Symbol;Acc:MGI:2384993]	Paip1	0.198519	1	0.788076	0	-0.689562	0	-0.571386	0
solute carrier family 7 (cationic amino acid transporter, y+ system), member 1 [Source:MGI Symbol;Acc:MGI:88117]	Slc7a1	-1.69166	0	-2.34957	0	-0.360853	0.0629	-0.571013	0
tumor necrosis factor (ligand) superfamily, member 12 [Source:MGI Symbol;Acc:MGI:1196259]	Tnfsf12	0.989037	0	1.42631	0	-0.337654	0.9997	-0.570869	0.0175
zinc finger protein 655 [Source:MGI Symbol;Acc:MGI:1919861]	Zfp655	1.32556	0	2.00273	0	-0.319278	0.8331	-0.570788	0.0003
mannoside acetylglucosaminyltransferase 4, isoenzyme B [Source:MGI Symbol;Acc:MGI:2143974]	Mgat4b	-0.0940207	1	0.176016	1	-0.646991	0	-0.570407	0
transmembrane protein 98 [Source:MGI Symbol;Acc:MGI:1923457]	Tmem98	1.26208	0	1.60548	0	-0.282133	0.1172	-0.570209	0
DEAD (Asp-Glu-Ala-Asp) box polypeptide 5 [Source:MGI Symbol;Acc:MGI:105037]	Ddx5	-0.244477	1	-0.345361	0.4735	-0.466991	0.0001	-0.569922	0
cylindromatosis (turban tumor syndrome) [Source:MGI Symbol;Acc:MGI:1921506]	Cyld	0.355558	0.0387	0.446955	0.0055	-0.618201	0	-0.56916	0
ubiquitin-conjugating enzyme E2I [Source:MGI Symbol;Acc:MGI:107365]	Ube2i	-0.569263	0	-0.930878	0	-0.24592	0.7287	-0.569008	0
phosphatidylinositol 3 kinase, regulatory subunit, polypeptide 3 (p55) [Source:MGI Symbol;Acc:MGI:109277]	Pik3r3	-0.603253	0	-0.391645	0.0001	-0.0695442	1	-0.568884	0
predicted gene 13594 [Source:MGI Symbol;Acc:MGI:3702953]	Gm13594	-0.0330986	1	0.06371	1	-0.278178	0.9881	-0.568623	0.0001
NADH dehydrogenase (ubiquinone) 1 alpha subcomplex, assembly factor 2 [Source:MGI Symbol;Acc:MGI:1922847]	Ndufaf2	-0.310159	0.9726	-0.952436	0	-0.615643	0	-0.568396	0.0162
cortactin [Source:MGI Symbol;Acc:MGI:99695]	Cttn	-0.128453	1	0.15941	1	-0.14734	1	-0.568306	0.8309
glyoxylate reductase/hydroxypyruvate reductase [Source:MGI Symbol;Acc:MGI:1923488]	Grhpr	-0.575228	0	-1.16896	0	-0.176425	1	-0.567697	0
ubiquitin-conjugating enzyme E2B [Source:MGI Symbol;Acc:MGI:102944]	Ube2b	1.18457	0	1.12131	0	-0.482055	0	-0.567081	0
UTP3, small subunit (SSU) processome component, homolog (S. cerevisiae) [Source:MGI Symbol;Acc:MGI:1919230]	Utp3	-0.349395	0.0017	-0.276705	0.2403	-0.451354	0	-0.566825	0
zinc finger protein 62 [Source:MGI Symbol;Acc:MGI:99662]	Zfp62	0.471135	0	0.870566	0	-0.34333	0.8392	-0.566782	0
TSC22 domain family, member 1 [Source:MGI Symbol;Acc:MGI:109127]	Tsc22d1	1.362	0	2.19323	0	-0.124813	1	-0.566771	0
RAS related protein 2a [Source:MGI Symbol;Acc:MGI:97855]	Rap2a	-0.785549	0	-1.65148	0	-0.427308	0	-0.566765	0
ubiquitin-conjugating enzyme E2B [Source:MGI Symbol;Acc:MGI:102944]	Ube2b	1.18416	0	1.12033	0	-0.488226	0	-0.566299	0.0038
ring finger protein 170 [Source:MGI Symbol;Acc:MGI:1924983]	Rnf170	0.0598813	1	0.0357224	1	-0.592939	0	-0.566248	0
stromal membrane-associated GTPase-activating protein 2 [Source:MGI Symbol;Acc:MGI:1917030]	Smap2	1.54984	0	1.07098	0	-0.561654	0	-0.566165	0
centromere protein M [Source:MGI Symbol;Acc:MGI:1913820]	Cenpm	-0.3971	0.0001	-2.38779	0	-0.387074	0.0001	-0.566071	0
ninein [Source:MGI Symbol;Acc:MGI:105108]	Nin	-0.599709	0	-1.32476	0	-0.902408	0	-0.565716	0.0002
LYR motif containing 2 [Source:MGI Symbol;Acc:MGI:1917573]	Lyrm2	0.463298	0	0.772071	0	-0.246212	1	-0.56555	0
lamin B receptor [Source:MGI Symbol;Acc:MGI:2138281]	Lbr	-0.617992	0	-2.02238	0	-0.142371	1	-0.565547	0
CD320 antigen [Source:MGI Symbol;Acc:MGI:1860083]	Cd320	-0.207829	1	-0.451185	0.0101	-0.280478	0.9993	-0.56553	0
adenylate kinase 4 [Source:MGI Symbol;Acc:MGI:87979]	Ak4	-0.617012	0	-0.663863	0	-0.306047	0.0024	-0.565246	0
cDNA sequence BC048507 [Source:MGI Symbol;Acc:MGI:3040680]	BC048507	-0.699541	0	-0.456981	0	-0.33099	0.0001	-0.564327	0
RIKEN cDNA 4930519F09 gene [Source:MGI Symbol;Acc:MGI:2149783]	4930519F09Rik	-0.0928201	1	-0.471905	0.0005	-0.329288	0.2202	-0.564216	0.001
coiled-coil domain containing 92 [Source:MGI Symbol;Acc:MGI:106485]	Ccdc92	-0.857124	0	-1.07764	0	-0.358735	0.0011	-0.563945	0
calmodulin regulated spectrin-associated protein 1 [Source:MGI Symbol;Acc:MGI:3036242]	Camsap1	-0.73095	0	-0.651423	0	-0.797102	0	-0.563427	0
adenylate kinase 2 [Source:MGI Symbol;Acc:MGI:87978]	Ak2	-0.995592	0	-1.4039	0	-0.246567	1	-0.563248	0.0001
LIM domain only 4 [Source:MGI Symbol;Acc:MGI:109360]	Lmo4	-0.476775	0.0001	-1.64184	0	-0.657409	0	-0.56218	0
methylenetetrahydrofolate dehydrogenase (NADP+ dependent) 2-like [Source:MGI Symbol;Acc:MGI:1915871]	Mthfd2l	0.108197	1	0.100224	1	-0.455107	0.0558	-0.562152	0.0002
apelin [Source:MGI Symbol;Acc:MGI:1353624]	Apln	-0.591458	0.0616	-0.801765	0	-0.815654	0.0001	-0.561954	0.0668
regulation of nuclear pre-mRNA domain containing 2 [Source:MGI Symbol;Acc:MGI:1922387]	Rprd2	1.13177	0	1.76724	0	-0.491626	0	-0.561699	0.0002
transcription elongation factor A (SII) 1 [Source:MGI Symbol;Acc:MGI:1196624]	Tcea1	0.0291914	1	-0.494339	0	-0.80432	0	-0.561694	0
RIKEN cDNA 0610011F06 gene [Source:MGI Symbol;Acc:MGI:1915597]	0610011F06Rik	-0.0733492	1	-0.406092	0.0001	-0.418481	0	-0.56165	0
exportin 6 [Source:MGI Symbol;Acc:MGI:2429950]	Xpo6	-0.495221	0	-0.464027	0	-0.642421	0	-0.561281	0
cereblon [Source:MGI Symbol;Acc:MGI:1913277]	Crbn	0.479893	0.0001	-0.36042	0.3627	-0.294746	1	-0.561151	0
solute carrier family 1 (neutral amino acid transporter), member 5 [Source:MGI Symbol;Acc:MGI:105305]	Slc1a5	-0.832408	0	-1.66912	0	-0.566906	0	-0.560562	0
actin, gamma, cytoplasmic 1 [Source:MGI Symbol;Acc:MGI:87906]	Actg1	-0.690828	0.0003	-0.935622	0	-0.193176	1	-0.560141	1
abhydrolase domain containing 13 [Source:MGI Symbol;Acc:MGI:1916154]	Abhd13	0.0307739	1	0.0649932	1	-0.344159	0.1525	-0.559862	0
protein kinase, cAMP dependent, catalytic, beta [Source:MGI Symbol;Acc:MGI:97594]	Prkacb	-0.0399984	1	-0.101519	1	-0.397366	0.2799	-0.559809	0.0002
serine/arginine-rich splicing factor 2 [Source:MGI Symbol;Acc:MGI:98284]	Srsf2	-1.57407	0	-1.85324	0	-0.234806	0.8173	-0.558508	0
aspartate-beta-hydroxylase [Source:MGI Symbol;Acc:MGI:1914186]	Asph	-0.154734	1	-0.636479	0	-0.562308	0	-0.55803	0
prostate stem cell antigen [Source:MGI Symbol;Acc:MGI:1919623]	Psca	-0.451463	0.0001	-0.040531	1	-0.78172	0	-0.557843	0.0043
lymphotoxin B receptor [Source:MGI Symbol;Acc:MGI:104875]	Ltbr	-0.889033	0	-0.672906	0	-0.566006	0	-0.557028	0.0002
predicted gene 608 [Source:MGI Symbol;Acc:MGI:2685454]	Gm608	0.011238	1	0.241389	1	-0.248984	1	-0.556712	0.0006
regulator of chromosome condensation (RCC1) and BTB (POZ) domain containing protein 2 [Source:MGI Symbol;Acc:MGI:1917200]	Rcbtb2	-0.126045	1	-0.765477	0	-0.411618	0.0206	-0.556463	0.0002
leucine rich repeat protein 1 [Source:MGI Symbol;Acc:MGI:1916956]	Lrr1	-0.988625	0.0001	-2.52026	0	-0.253125	0.0671	-0.556279	0
forkhead box A3 [Source:MGI Symbol;Acc:MGI:1347477]	Foxa3	-0.252817	1	-0.353878	0.1304	-0.022704	1	-0.556217	0
tetratricopeptide repeat domain 39B [Source:MGI Symbol;Acc:MGI:1917113]	Ttc39b	0.320993	0.1001	-0.0775129	1	-0.464015	0	-0.556152	0
calpain 7 [Source:MGI Symbol;Acc:MGI:1338030]	Capn7	0.412109	0.0251	0.72167	0	-0.515066	0	-0.555763	0
EFR3 homolog A (S. cerevisiae) [Source:MGI Symbol;Acc:MGI:1923990]	Efr3a	-0.353706	0.0039	-0.649897	0	-0.509621	0	-0.555221	0.0001
transcriptional adaptor 1 [Source:MGI Symbol;Acc:MGI:1196415]	Tada1	-1.56608	0	-2.12323	0	-0.396067	0	-0.554172	0
checkpoint with forkhead and ring finger domains [Source:MGI Symbol;Acc:MGI:2444898]	Chfr	0.926895	0	1.31079	0	-0.274866	0.1366	-0.554155	0
cyclin Y [Source:MGI Symbol;Acc:MGI:1915224]	Ccny	-0.51116	0.0001	-0.917409	0	-0.482426	0	-0.553619	0
transmembrane protein 63a [Source:MGI Symbol;Acc:MGI:2384789]	Tmem63a	0.00312726	1	0.639954	0	-0.0281604	1	-0.553532	0
family with sequence similarity 179, member B [Source:MGI Symbol;Acc:MGI:2684313]	Fam179b	-0.180188	1	-0.192866	1	-0.50225	0	-0.55353	0
histone cluster 2, H2aa1 [Source:MGI Symbol;Acc:MGI:96097]	Hist2h2aa1	-1.1973	0	-2.61421	0	-0.0674656	1	-0.553339	0
sema domain, immunoglobulin domain (Ig), transmembrane domain (TM) and short cytoplasmic domain, (semaphorin) 4D [Source:MGI Symbol;Acc:MGI:109244]	Sema4d	-0.442752	0.0001	-0.0574697	1	-0.517046	0.0001	-0.553068	0
kelch repeat and BTB (POZ) domain containing 8 [Source:MGI Symbol;Acc:MGI:2661430]	Kbtbd8	-0.366759	1	-0.981542	0	-0.346602	0.5232	-0.552939	0.0001
microtubule-actin crosslinking factor 1 [Source:MGI Symbol;Acc:MGI:108559]	Macf1	-0.0976578	1	-0.358796	0.0176	-0.57926	0	-0.552859	0
ribosomal protein S6 kinase, polypeptide 5 [Source:MGI Symbol;Acc:MGI:1920336]	Rps6ka5	0.717	0	-0.123926	1	-0.110989	1	-0.552857	0.0009
histone cluster 1, H2aa [Source:MGI Symbol;Acc:MGI:2448285]	Hist1h2aa	-1.19948	0	-2.52864	0	-0.0551281	1	-0.552537	0
interferon stimulated exonuclease gene 20-like 2 [Source:MGI Symbol;Acc:MGI:2140076]	Isg20l2	-0.454688	0.1713	-0.418371	1	-0.645546	0	-0.55229	0
immediate early response 5-like [Source:MGI Symbol;Acc:MGI:1919750]	Ier5l	-1.06175	0	-1.26507	0	-0.457902	0.0013	-0.552017	0
chromobox 5 [Source:MGI Symbol;Acc:MGI:109372]	Cbx5	-0.343185	0.0141	-0.787642	0	-0.185985	1	-0.551877	0.0202
death-associated protein kinase 2 [Source:MGI Symbol;Acc:MGI:1341297]	Dapk2	0.283993	0.9998	0.211037	0.9998	-0.472323	0.0007	-0.551812	0.0033
family with sequence similarity 101, member B [Source:MGI Symbol;Acc:MGI:1923816]	Fam101b	-1.34081	0	-1.81263	0	-0.162249	1	-0.55178	1
WD repeat domain 6 [Source:MGI Symbol;Acc:MGI:1930140]	Wdr6	-0.570912	0.0001	-0.231385	1	-0.259692	1	-0.550915	0
UBX domain protein 7 [Source:MGI Symbol;Acc:MGI:2146388]	Ubxn7	0.67615	0	0.944911	0	-0.503527	0.0072	-0.550894	0
signal peptide peptidase like 2A [Source:MGI Symbol;Acc:MGI:1913802]	Sppl2a	0.162635	1	0.216238	1	-0.524517	0	-0.550051	0.5201
serine/arginine-rich splicing factor 6 [Source:MGI Symbol;Acc:MGI:1915246]	Srsf6	-1.14106	0	-1.97379	0	-0.49232	0	-0.549903	0
predicted gene 10229 [Source:MGI Symbol;Acc:MGI:3711943]	Gm10229	0.299374	0.1117	0.551482	0	-0.14622	1	-0.549232	0
oxysterol binding protein-like 3 [Source:MGI Symbol;Acc:MGI:1918970]	Osbpl3	0.202261	1	0.418298	0	-0.287654	0.998	-0.548805	0.0002
guanylate-binding protein 9 [Source:MGI Symbol;Acc:MGI:3605620]	Gbp9	0.233998	0.9994	1.81365	0	0.0434145	1	-0.548748	0.0006
dimethylarginine dimethylaminohydrolase 2 [Source:MGI Symbol;Acc:MGI:1859016]	Ddah2	-1.62732	0	-2.70389	0	-0.585276	0	-0.547818	0.0001
mitochondrial ribosomal protein L49 [Source:MGI Symbol;Acc:MGI:108180]	Mrpl49	-0.96028	0	-1.18287	0	-0.287223	0.0541	-0.54766	0
TAF8 RNA polymerase II, TATA box binding protein (TBP)-associated factorq [Source:MGI Symbol;Acc:MGI:1926879]	Taf8	0.570337	0	0.491227	0.6202	-0.537527	0.001	-0.54697	0
expressed sequence C87436 [Source:MGI Symbol;Acc:MGI:2141787]	C87436	-0.311929	0.9646	-0.123289	1	-0.374894	0	-0.546325	0.0002
distal-less homeobox 4 [Source:MGI Symbol;Acc:MGI:94904]	Dlx4	-1.05101	0	-0.754675	0	-0.332471	0.0119	-0.546226	0.0002
diacylglycerol O-acyltransferase 1 [Source:MGI Symbol;Acc:MGI:1333825]	Dgat1	-0.328806	0.0196	-0.186667	1	-0.164388	1	-0.546212	0.0001
cDNA sequence BC017158 [Source:MGI Symbol;Acc:MGI:2384572]	BC017158	0.0253832	1	-0.188649	1	-0.481342	0	-0.546085	0
guanylate-binding protein 8 [Source:MGI Symbol;Acc:MGI:1923324]	Gbp8	0.225411	1	2.14956	0	-0.0777017	1	-0.545873	0.0699
ubiquitin-conjugating enzyme E2B [Source:MGI Symbol;Acc:MGI:102944]	Ube2b	1.2016	0	1.14649	0	-0.475802	0	-0.545847	0
crystallin, gamma E [Source:MGI Symbol;Acc:MGI:88525]	Cryge	0.0231986	1	-0.0256572	1	-0.102095	1	-0.545744	1
transmembrane protein 158 [Source:MGI Symbol;Acc:MGI:1919559]	Tmem158	2.4026	0	1.834	0	-0.415218	0.1954	-0.545557	0.001
coiled-coil domain containing 126 [Source:MGI Symbol;Acc:MGI:1889376]	Ccdc126	-0.11819	1	-0.417016	0.0016	-0.230734	1	-0.545171	0.0001
carbonyl reductase 1 [Source:MGI Symbol;Acc:MGI:88284]	Cbr1	0.351187	0.9015	0.548012	0	-0.297264	0.1133	-0.544616	0
expressed sequence AI314180 [Source:MGI Symbol;Acc:MGI:2140220]	AI314180	-0.26053	0.3282	0.101126	1	-0.45731	0	-0.544567	0
LIM domain only 4 [Source:MGI Symbol;Acc:MGI:109360]	Lmo4	-0.619124	0	-2.04916	0	-0.810885	0	-0.544348	0
kelch-like 20 (Drosophila) [Source:MGI Symbol;Acc:MGI:2444855]	Klhl20	0.463696	0.0016	0.518968	0	-0.589767	0	-0.544294	0.0002
	AC099930.1	0.767536	0	0.924678	0	-0.271324	0.7156	-0.544266	0.0006
ADP-ribosylation factor-like 5B [Source:MGI Symbol;Acc:MGI:1923119]	Arl5b	0.545059	0.0001	0.584376	0	-0.529366	0.0006	-0.544208	0.002
integrator complex subunit 10 [Source:MGI Symbol;Acc:MGI:1918135]	Ints10	-0.179533	1	-0.46264	0	-0.411065	0.0018	-0.544054	0
src family associated phosphoprotein 2 [Source:MGI Symbol;Acc:MGI:1889206]	Skap2	-0.0984113	1	0.185194	1	-0.313156	1	-0.543995	0
tocopherol (alpha) transfer protein-like [Source:MGI Symbol;Acc:MGI:1923330]	Ttpal	0.256371	0.338	0.70512	0	-0.349202	0.0004	-0.543972	0
epithelial membrane protein 2 [Source:MGI Symbol;Acc:MGI:1098726]	Emp2	0.161785	1	0.902652	0	-0.150718	1	-0.543585	0.0002
guanylate cyclase 1, soluble, beta 2 [Source:MGI Symbol;Acc:MGI:2660873]	Gucy1b2	0.0946955	1	0.248013	1	-0.131854	1	-0.543278	0
lipoyl(octanoyl) transferase 2 (putative) [Source:MGI Symbol;Acc:MGI:1914414]	Lipt2	-1.80743	0	-2.12032	0	-0.28219	0.1891	-0.542778	0
immediate early response 5-like [Source:MGI Symbol;Acc:MGI:1919750]	Ier5l	-0.624225	0	-0.701257	0.0132	-0.484851	0	-0.542744	0
echinoderm microtubule associated protein like 3 [Source:MGI Symbol;Acc:MGI:2387612]	Eml3	-0.79424	0	-0.179776	1	-0.214068	1	-0.542742	0
MAP kinase-interacting serine/threonine kinase 1 [Source:MGI Symbol;Acc:MGI:894316]	Mknk1	0.458382	0.0014	0.572831	0	-0.519309	0	-0.54274	0.0111
nucleophosmin 1 [Source:MGI Symbol;Acc:MGI:106184]	Npm1	-0.410353	0.1171	-1.27258	0	-0.437324	0	-0.542357	0.0066
SEH1-like (S. cerevisiae [Source:MGI Symbol;Acc:MGI:1919374]	Seh1l	-0.70466	0	-1.05044	0	-0.340161	0.0004	-0.542343	0
bridging integrator 3 [Source:MGI Symbol;Acc:MGI:1929883]	Bin3	0.365278	0.0094	0.915911	0	-0.380446	0.0005	-0.542236	0
	AC134826.1	-0.412602	0.9998	-0.930259	0	-0.537814	0.077	-0.541998	0.9995
ectonucleotide pyrophosphatase/phosphodiesterase 4 [Source:MGI Symbol;Acc:MGI:2682634]	Enpp4	-0.707287	0	-0.795827	0	-0.329205	0.1146	-0.541906	0
coiled-coil domain containing 88C [Source:MGI Symbol;Acc:MGI:1915589]	Ccdc88c	-1.15377	0	-1.39338	0	-0.325955	0.1817	-0.541431	0
family with sequence similarity 134, member C [Source:MGI Symbol;Acc:MGI:1915248]	Fam134c	0.755272	0	0.256817	0.8008	-0.325498	0.0041	-0.541162	0
tubulin, alpha 4A [Source:MGI Symbol;Acc:MGI:1095410]	Tuba4a	-0.875619	0	-1.13532	0	-0.577407	0	-0.540885	0
mitogen-activated protein kinase kinase kinase 14 [Source:MGI Symbol;Acc:MGI:1858204]	Map3k14	0.0173518	1	0.734352	0	-0.441458	0	-0.540558	0
La ribonucleoprotein domain family, member 7 [Source:MGI Symbol;Acc:MGI:107634]	Larp7	-0.0908275	1	-1.12236	0	-0.311114	0.0065	-0.54051	0
WD repeat domain 13 [Source:MGI Symbol;Acc:MGI:1914661]	Wdr13	-0.216094	1	-0.389461	0.4084	-0.366011	0.4637	-0.539759	0.0002
ATP-binding cassette, sub-family B (MDR/TAP), member 6 [Source:MGI Symbol;Acc:MGI:1921354]	Abcb6	-1.37756	0	-1.83396	0	-0.249726	0.2632	-0.539618	0
thrombospondin 1 [Source:MGI Symbol;Acc:MGI:98737]	Thbs1	-0.905437	0	-1.5116	0	-0.773585	0	-0.539123	0
WAP four-disulfide core domain 2 [Source:MGI Symbol;Acc:MGI:1914951]	Wfdc2	-0.738513	0	-1.28031	0	-0.160872	1	-0.538365	0.0131
tRNA methyltransferase 10 homolog A (S. cerevisiae) [Source:MGI Symbol;Acc:MGI:1920421]	Trmt10a	-1.0472	0	-1.54519	0	-0.685218	0.0001	-0.537678	0.0106
ribophorin I [Source:MGI Symbol;Acc:MGI:98084]	Rpn1	-0.837767	0	-2.02904	0	-0.4251	0	-0.537167	0
nucleolin [Source:MGI Symbol;Acc:MGI:97286]	Ncl	-0.727826	0	-1.07525	0	-0.646376	0	-0.537164	0.0481
glutathione S-transferase, C-terminal domain containing [Source:MGI Symbol;Acc:MGI:1914803]	Gstcd	-1.06871	0	-2.39662	0	-0.53974	0	-0.536421	0
ArfGAP with coiled-coil, ankyrin repeat and PH domains 2 [Source:MGI Symbol;Acc:MGI:1925868]	Acap2	0.176476	1	0.17113	1	-0.57106	0	-0.536392	0
zinc finger protein 148 [Source:MGI Symbol;Acc:MGI:1332234]	Zfp148	-0.269886	0.9549	-0.59146	0	-0.489713	0	-0.536177	0
histone cluster 2, H2ac [Source:MGI Symbol;Acc:MGI:2448316]	Hist2h2ac	-1.12835	0	-2.57196	0	-0.0806141	1	-0.536078	0
phosphatidylinositol-4-phosphate 5-kinase, type 1 gamma [Source:MGI Symbol;Acc:MGI:1298224]	Pip5k1c	0.551147	0	0.395809	0.0002	-0.301922	0.957	-0.535806	0.0006
nucleophosmin 1 [Source:MGI Symbol;Acc:MGI:106184]	Npm1	-0.472501	0.06	-1.98067	0	-0.496554	0.6465	-0.535507	1
signal peptide peptidase like 2B [Source:MGI Symbol;Acc:MGI:1920468]	Sppl2b	-0.284961	1	-0.287566	0.4313	-0.420368	0.0032	-0.535173	0.0058
serine/arginine-rich splicing factor 1 [Source:MGI Symbol;Acc:MGI:98283]	Srsf1	-1.15745	0	-1.94083	0	-0.0339255	1	-0.535016	0
vacuolar protein sorting 54 (yeast) [Source:MGI Symbol;Acc:MGI:2178798]	Vps54	0.469167	0	-0.125845	1	-0.478495	0.001	-0.534742	0
Rap guanine nucleotide exchange factor (GEF) 6 [Source:MGI Symbol;Acc:MGI:2384761]	Rapgef6	0.249737	1	-0.0401052	1	-0.532009	0	-0.534542	0
peroxiredoxin 2 [Source:MGI Symbol;Acc:MGI:109486]	Prdx2	0.167641	1	0.426522	0.1543	-0.382782	0.0088	-0.533574	0
ubiquitin-like modifier activating enzyme 1 [Source:MGI Symbol;Acc:MGI:98890]	Uba1	0.00741081	1	-0.0634454	1	-0.479174	0.0001	-0.533449	0.0002
peroxiredoxin 2 [Source:MGI Symbol;Acc:MGI:109486]	Prdx2	0.165018	1	0.504305	0.0309	-0.25363	1	-0.533267	0
mediator complex subunit 14 [Source:MGI Symbol;Acc:MGI:1349442]	Med14	-0.237779	0.9834	-1.40202	0	-0.296857	0.0029	-0.532746	0.0014
Ras and Rab interactor 3 [Source:MGI Symbol;Acc:MGI:2385708]	Rin3	0.346475	0.0049	0.624307	0	-0.0737576	1	-0.532633	0
ribosomal protein L13 [Source:MGI Symbol;Acc:MGI:105922]	Rpl13	-0.00636911	1	-0.126499	1	-0.392065	0.0004	-0.532353	0
methyltransferase like 25 [Source:MGI Symbol;Acc:MGI:3041259]	Mettl25	-0.205756	1	-0.397754	0.0711	-0.383354	0.0281	-0.532339	0.0435
killer cell lectin-like receptor subfamily A, member 13, pseudogene [Source:MGI Symbol;Acc:MGI:1321090]	Klra13-ps	-0.736362	0.0069	-1.11083	0	-0.102973	1	-0.532117	1
dipeptidylpeptidase 8 [Source:MGI Symbol;Acc:MGI:1921638]	Dpp8	-0.0349775	1	0.02561	1	-0.336706	0.1341	-0.531949	0.0003
zinc finger, DHHC domain containing 17 [Source:MGI Symbol;Acc:MGI:2445110]	Zdhhc17	1.13128	0	0.943636	0	-0.259136	1	-0.531348	1
cadherin 16 [Source:MGI Symbol;Acc:MGI:106671]	Cdh16	-0.131429	1	-0.900858	0	-0.351833	0.8893	-0.530581	0.0002
tubulin, alpha 4A [Source:MGI Symbol;Acc:MGI:1095410]	Tuba4a	-0.987371	0	-1.56189	0	-0.61776	0	-0.530404	0
G protein-coupled receptor 108 [Source:MGI Symbol;Acc:MGI:1925558]	Gpr108	-0.101408	1	-0.33817	0.9998	-0.447527	0.0007	-0.530316	0
protein kinase, AMP-activated, alpha 1 catalytic subunit [Source:MGI Symbol;Acc:MGI:2145955]	Prkaa1	1.09848	0	1.82499	0	-0.625191	0	-0.530283	0
UDP-GlcNAc:betaGal beta-1,3-N-acetylglucosaminyltransferase 3 [Source:MGI Symbol;Acc:MGI:2152535]	B3gnt3	0.747087	0	0.98719	0	-0.255653	0.0686	-0.529858	0.0002
interferon gamma inducible protein 30 [Source:MGI Symbol;Acc:MGI:2137648]	Ifi30	-0.718666	0	0.0503694	1	-0.383217	0.0001	-0.529612	0
EF-hand calcium binding domain 4A [Source:MGI Symbol;Acc:MGI:2446129]	Efcab4a	-0.202627	1	-0.145596	1	-0.251918	1	-0.529468	0.016
mitochondrial ribosomal protein S18C [Source:MGI Symbol;Acc:MGI:1915985]	Mrps18c	0.062177	1	-0.0635991	1	-0.625251	0	-0.529427	0
YKT6 homolog (S. Cerevisiae) [Source:MGI Symbol;Acc:MGI:1927550]	Ykt6	0.26774	1	1.05148	0	-0.462941	0.0053	-0.529364	0
Ly6/Plaur domain containing 3 [Source:MGI Symbol;Acc:MGI:1919684]	Lypd3	0.185714	1	-0.376566	0.0328	-0.161726	1	-0.529083	0.0002
telomeric repeat binding factor 2, interacting protein [Source:MGI Symbol;Acc:MGI:1929871]	Terf2ip	-0.164044	1	0.368768	0.1305	-0.274507	0.3874	-0.529079	0
tRNA aspartic acid methyltransferase 1 [Source:MGI Symbol;Acc:MGI:1274787]	Trdmt1	0.35216	0.0104	-0.153641	1	-0.310744	0.0011	-0.528948	0.342
plexin A1 [Source:MGI Symbol;Acc:MGI:107685]	Plxna1	-1.05702	0	-1.20041	0	-0.318619	0.0056	-0.528917	0.0003
MYC binding protein 2 [Source:MGI Symbol;Acc:MGI:2179432]	Mycbp2	-0.606966	0	-0.780787	0	-0.563486	0	-0.528821	0.0001
remodeling and spacing factor 1 [Source:MGI Symbol;Acc:MGI:2682305]	Rsf1	0.153261	1	0.316598	0.038	-0.292389	0.0403	-0.528452	0.0006
epithelial membrane protein 1 [Source:MGI Symbol;Acc:MGI:107941]	Emp1	-0.171157	1	-0.229595	1	-0.481848	0	-0.528388	0
1-acylglycerol-3-phosphate O-acyltransferase 6 (lysophosphatidic acid acyltransferase, zeta) [Source:MGI Symbol;Acc:MGI:2142716]	Agpat6	-0.435637	0	-0.426209	0.0022	-0.490308	0	-0.528259	0
1-acylglycerol-3-phosphate O-acyltransferase 2 (lysophosphatidic acid acyltransferase, beta) [Source:MGI Symbol;Acc:MGI:1914762]	Agpat2	-0.904767	0	-1.13602	0	-0.373768	0.0174	-0.527976	0.001
poly(A) binding protein interacting protein 2B [Source:MGI Symbol;Acc:MGI:2386865]	Paip2b	-0.108391	1	-0.587925	0	-0.59842	0	-0.527874	0
chromobox 8 [Source:MGI Symbol;Acc:MGI:1353589]	Cbx8	0.0461558	1	-0.272411	0.9931	-0.33702	0.2486	-0.527487	0.0443
olfactory receptor 166 [Source:MGI Symbol;Acc:MGI:3030000]	Olfr166	-0.271844	0.1269	-0.135643	1	-0.311906	0.0005	-0.527024	0
leucine-rich PPR-motif containing [Source:MGI Symbol;Acc:MGI:1919666]	Lrpprc	-0.430338	0.0001	-1.18035	0	-0.201994	0.9998	-0.526945	0
lin-54 homolog (C. elegans) [Source:MGI Symbol;Acc:MGI:2140902]	Lin54	-0.524448	0.0001	-1.90992	0	-0.58377	0	-0.526859	0
serine/arginine-rich splicing factor 10 [Source:MGI Symbol;Acc:MGI:1333805]	Srsf10	-0.249153	0.9236	-0.456969	0	-0.455109	0	-0.526654	0
forkhead box N2 [Source:MGI Symbol;Acc:MGI:1347478]	Foxn2	-0.908756	0	-1.52438	0	-0.340552	0.0022	-0.526641	0
mitochondrial ribosomal protein S18C [Source:MGI Symbol;Acc:MGI:1915985]	Mrps18c	0.100991	1	-0.0342682	1	-0.56422	0	-0.526118	0
reticulocalbin 2 [Source:MGI Symbol;Acc:MGI:1349765]	Rcn2	-0.509814	0.0015	-0.874164	0	-0.741597	0	-0.525974	0
zinc finger protein 605 [Source:MGI Symbol;Acc:MGI:2444933]	Zfp605	0.25405	1	0.0216929	1	-0.42132	0.0001	-0.525908	0.0002
regulator of chromosome condensation (RCC1) and BTB (POZ) domain containing protein 2 [Source:MGI Symbol;Acc:MGI:1917200]	Rcbtb2	-0.105389	1	-0.475734	0.0017	-0.148961	1	-0.525906	0.001
NADH dehydrogenase (ubiquinone) 1 beta subcomplex, 9 [Source:MGI Symbol;Acc:MGI:1913468]	Ndufb9	0.254231	0.9986	0.243754	0.6499	-0.444981	0.0007	-0.525125	0
zinc finger, DHHC domain containing 17 [Source:MGI Symbol;Acc:MGI:2445110]	Zdhhc17	0.963755	0	1.13784	0	-0.387038	0.0001	-0.525119	0
ankyrin repeat domain 11 [Source:MGI Symbol;Acc:MGI:1924337]	Ankrd11	0.308105	0.102	0.443882	0	-0.659333	0	-0.525094	0.0032
family with sequence similarity 171, member A1 [Source:MGI Symbol;Acc:MGI:2442917]	Fam171a1	-0.756499	0	-1.29213	0	-0.535449	0.0159	-0.524872	0
predicted gene 9670 [Source:MGI Symbol;Acc:MGI:3780078]	Gm9670	-0.0440683	1	-0.243713	1	-0.447572	0	-0.52473	0
suppressor of variegation 4-20 homolog 1 (Drosophila) [Source:MGI Symbol;Acc:MGI:2444557]	Suv420h1	0.459127	0	0.715375	0	-0.289617	0.9817	-0.524367	0
histone cluster 1, H2af [Source:MGI Symbol;Acc:MGI:2448309]	Hist1h2af	-0.957182	0	-2.48606	0	-0.120843	1	-0.524305	0
t-complex-associated testis expressed 3 [Source:MGI Symbol;Acc:MGI:98642]	Tcte3	0.0872048	1	0.035272	1	-0.377621	0.3093	-0.524234	0.3001
NIMA (never in mitosis gene a)-related expressed kinase 6 [Source:MGI Symbol;Acc:MGI:1891638]	Nek6	-0.500399	0.0016	-0.177502	1	-0.675862	0	-0.523973	0.0011
predicted gene 15204 [Source:MGI Symbol;Acc:MGI:3648402]	Gm15204	-0.186495	1	-0.182316	1	-0.35826	0.067	-0.523849	0.0015
DnaJ (Hsp40) homolog, subfamily C, member 16 [Source:MGI Symbol;Acc:MGI:2442146]	Dnajc16	0.156953	1	0.178096	1	-0.442903	0.0022	-0.523583	0
RIKEN cDNA 4930538K18 gene [Source:MGI Symbol;Acc:MGI:1922430]	4930538K18Rik	0.334557	0.019	0.626355	0	-0.121534	1	-0.523521	0
tubulin, alpha 8 [Source:MGI Symbol;Acc:MGI:1858225]	Tuba8	-1.0236	0	-1.68991	0	-0.525459	0	-0.523508	0
CKLF-like MARVEL transmembrane domain containing 8 [Source:MGI Symbol;Acc:MGI:2447167]	Cmtm8	-0.311182	0.3683	-0.0293333	1	-0.333683	0.0014	-0.522756	0
zinc finger protein 934 [Source:MGI Symbol;Acc:MGI:1924367]	Zfp934	-0.858528	0	-1.28635	0	-0.550083	0	-0.522706	0.2603
trafficking protein, kinesin binding 2 [Source:MGI Symbol;Acc:MGI:1918077]	Trak2	0.337346	0.0049	0.360724	0.0663	-0.537271	0	-0.522652	0
ankyrin 3, epithelial [Source:MGI Symbol;Acc:MGI:88026]	Ank3	-0.12377	1	0.795094	0	-0.699323	0.0001	-0.521289	0.1376
transmembrane anterior posterior transformation 1 [Source:MGI Symbol;Acc:MGI:2683537]	Tapt1	-0.509138	0	-1.13567	0	-0.422706	0	-0.521074	0
nucleosome assembly protein 1-like 1 [Source:MGI Symbol;Acc:MGI:1855693]	Nap1l1	-0.808566	0	-2.54445	0	-0.377025	0	-0.520881	0
OAF homolog (Drosophila) [Source:MGI Symbol;Acc:MGI:94852]	Oaf	-2.44664	0	-2.81708	0	-0.467675	0.0339	-0.520738	0
prosaposin-like 1 [Source:MGI Symbol;Acc:MGI:1924193]	Psapl1	-0.43962	0.0001	-0.263747	0.9989	-0.0424791	1	-0.52067	0.0005
microsomal glutathione S-transferase 1 [Source:MGI Symbol;Acc:MGI:1913850]	Mgst1	1.22735	0	2.1101	0	-0.016909	1	-0.520399	0
prostaglandin-endoperoxide synthase 1 [Source:MGI Symbol;Acc:MGI:97797]	Ptgs1	-1.19383	0	-2.10018	0	-0.151838	1	-0.519745	0.001
myeloid/lymphoid or mixed-lineage leukemia (trithorax homolog, Drosophila); translocated to, 3 [Source:MGI Symbol;Acc:MGI:1917372]	Mllt3	-0.466989	0	-0.783939	0	-0.399435	0	-0.519644	0
atlastin GTPase 3 [Source:MGI Symbol;Acc:MGI:1924270]	Atl3	0.995868	0	1.45882	0	-0.377664	0	-0.519375	0.0311
exosome component 8 [Source:MGI Symbol;Acc:MGI:1916889]	Exosc8	-0.572239	0	-3.15264	0	-0.673341	0	-0.51927	0
Fc receptor-like 1 [Source:MGI Symbol;Acc:MGI:2442862]	Fcrl1	-0.0878177	1	-0.28136	0.7607	-0.307019	0.9997	-0.519137	0.3296
solute carrier family 35 (UDP-N-acetylglucosamine (UDP-GlcNAc) transporter), member 3 [Source:MGI Symbol;Acc:MGI:1917648]	Slc35a3	0.208992	1	0.647637	0	-0.401961	0.0005	-0.519117	0
galactokinase 2 [Source:MGI Symbol;Acc:MGI:1917226]	Galk2	-0.294107	0.8253	0.398383	0.0136	-0.594733	0	-0.518796	0.001
tubulin, alpha 3A [Source:MGI Symbol;Acc:MGI:1095406]	Tuba3a	-0.877272	0	-1.56193	0	-0.497999	0.0001	-0.518645	0
zinc finger protein 326 [Source:MGI Symbol;Acc:MGI:1927246]	Zfp326	0.623015	0	-0.339816	1	-0.316013	0.1572	-0.518558	0.0012
trafficking protein, kinesin binding 1 [Source:MGI Symbol;Acc:MGI:1914345]	Trak1	-0.51762	0	-0.455871	0	-0.667357	0	-0.518333	0
CDGSH iron sulfur domain 2 [Source:MGI Symbol;Acc:MGI:1914256]	Cisd2	-0.27802	1	-0.372371	0.0018	-0.174336	1	-0.51817	0
BTB (POZ) domain containing 10 [Source:MGI Symbol;Acc:MGI:1916065]	Btbd10	0.120113	1	0.0906367	1	-0.470137	0.0037	-0.517676	0.0003
kelch-like 21 (Drosophila) [Source:MGI Symbol;Acc:MGI:1919288]	Klhl21	0.468948	0.0001	1.15071	0	-0.661647	0	-0.517255	0
golgi reassembly stacking protein 2 [Source:MGI Symbol;Acc:MGI:2135962]	Gorasp2	-0.328475	0.0055	-0.546532	0	-0.495398	0	-0.517236	0.0225
prothymosin alpha [Source:MGI Symbol;Acc:MGI:97803]	Ptma	-1.19841	0	-2.47138	0	-0.22315	1	-0.516563	1
regulatory factor X-associated ankyrin-containing protein [Source:MGI Symbol;Acc:MGI:1333865]	Rfxank	1.07011	0	1.0616	0	-0.142756	1	-0.51645	0
schlafen 8 [Source:MGI Symbol;Acc:MGI:2672859]	Slfn8	-0.851639	0	-0.876763	0	-0.325415	0.0032	-0.51606	0.0094
alkaline ceramidase 3 [Source:MGI Symbol;Acc:MGI:1913440]	Acer3	-0.0851998	1	-0.627217	0	-0.705585	0	-0.515977	0
pellino 1 [Source:MGI Symbol;Acc:MGI:1914495]	Peli1	0.770973	0	0.751704	0	-0.359773	0.0167	-0.51586	0.0078
ribophorin I [Source:MGI Symbol;Acc:MGI:98084]	Rpn1	-0.755722	0	-1.89247	0	-0.298123	0.0509	-0.515691	0
CD81 antigen [Source:MGI Symbol;Acc:MGI:1096398]	Cd81	-0.560941	0	-0.258615	0.9997	-0.363978	0.0005	-0.51555	0
MYC binding protein 2 [Source:MGI Symbol;Acc:MGI:2179432]	Mycbp2	-0.627696	0	-0.755695	0	-0.606052	0.0005	-0.515526	0
nuclear receptor subfamily 3, group C, member 1 [Source:MGI Symbol;Acc:MGI:95824]	Nr3c1	0.211735	1	0.557288	0	-0.361161	0.0594	-0.515379	0
centromere protein W [Source:MGI Symbol;Acc:MGI:1913561]	Cenpw	0.0485989	1	-2.3291	0	-0.654476	0	-0.515284	0
polymerase (DNA-directed), epsilon 4 (p12 subunit) [Source:MGI Symbol;Acc:MGI:1914229]	Pole4	-0.68258	0	-1.47902	0	-0.470317	0.0302	-0.51514	0
zinc finger, AN1-type domain 3 [Source:MGI Symbol;Acc:MGI:1096572]	Zfand3	-0.855332	0	-1.54382	0	-0.55969	0	-0.514837	0
ladinin [Source:MGI Symbol;Acc:MGI:109343]	Lad1	-0.840309	0	-0.773844	0	-0.300743	1	-0.514823	0
fucosidase, alpha-L- 1, tissue [Source:MGI Symbol;Acc:MGI:95593]	Fuca1	0.317269	0.1207	1.23471	0	-0.384077	0	-0.514668	0
RIKEN cDNA 2210016F16 gene [Source:MGI Symbol;Acc:MGI:1917403]	2210016F16Rik	-0.0939483	1	-0.339615	0.0801	-0.3637	0.0001	-0.514173	0
pyruvate dehydrogenase E1 alpha 1 [Source:MGI Symbol;Acc:MGI:97532]	Pdha1	-0.217061	0.9998	-0.552457	0	-0.342944	0.0025	-0.51364	0
heat shock protein 1B [Source:MGI Symbol;Acc:MGI:99517]	Hspa1b	-0.67539	0	-0.0904757	1	-0.392279	0.6224	-0.513306	0.047
zinc finger protein 148 [Source:MGI Symbol;Acc:MGI:1332234]	Zfp148	0.198104	1	-0.480478	0.0001	-0.526679	0	-0.512744	0
ribosomal protein S7 [Source:MGI Symbol;Acc:MGI:1333818]	Rps7	-0.203467	1	-0.242553	1	-0.761847	0	-0.511068	0.5666
v-raf murine sarcoma 3611 viral oncogene homolog [Source:MGI Symbol;Acc:MGI:88065]	Araf	-0.144162	1	-0.511602	0	-0.182511	1	-0.51048	0.0002
BAH domain and coiled-coil containing 1 [Source:MGI Symbol;Acc:MGI:2679272]	Bahcc1	-0.752989	0	-0.699094	0.0001	-0.585102	0	-0.510173	0
glycine cleavage system protein H (aminomethyl carrier) [Source:MGI Symbol;Acc:MGI:1915383]	Gcsh	-0.664178	0	-2.11275	0	-0.529931	0.0005	-0.5099	0
pyruvate kinase, muscle [Source:MGI Symbol;Acc:MGI:97591]	Pkm	-0.453577	0.1224	-1.54804	0	-0.0957618	1	-0.509859	0.6413
polymerase (RNA) III (DNA directed) polypeptide F [Source:MGI Symbol;Acc:MGI:1924086]	Polr3f	-0.215179	1	-0.690139	0	-0.459899	0	-0.509641	0
sema domain, immunoglobulin domain (Ig), transmembrane domain (TM) and short cytoplasmic domain, (semaphorin) 4A [Source:MGI Symbol;Acc:MGI:107560]	Sema4a	0.0107655	1	0.143798	1	-0.0661706	1	-0.50959	1
glucosaminyl (N-acetyl) transferase 1, core 2 [Source:MGI Symbol;Acc:MGI:95676]	Gcnt1	0.407407	0.8194	0.0461697	1	-0.558508	0.0489	-0.509489	0.8668
TBC1 domain family, member 19 [Source:MGI Symbol;Acc:MGI:1914499]	Tbc1d19	0.454355	0	0.536202	0	-0.345476	0.0665	-0.509183	0
DALR anticodon binding domain containing 3 [Source:MGI Symbol;Acc:MGI:1915039]	Dalrd3	-0.450648	0.0013	-0.733954	0	-0.351152	0.001	-0.509105	0
ring finger protein 114 [Source:MGI Symbol;Acc:MGI:1933159]	Rnf114	-0.318887	0.993	0.58627	0	-0.337913	1	-0.509021	0.0008
bora, aurora kinase A activator [Source:MGI Symbol;Acc:MGI:1924994]	Bora	-1.27367	0	-2.12668	0	-0.441536	0.0013	-0.50899	0
DET1 and DDB1 associated 1 [Source:MGI Symbol;Acc:MGI:1913748]	Dda1	0.0372557	1	-0.051142	1	-0.362996	0.9992	-0.508697	0.0003
RIKEN cDNA 4933426M11 gene [Source:MGI Symbol;Acc:MGI:2444661]	4933426M11Rik	2.28911	0	2.52863	0	-0.26262	0.0671	-0.508689	0.0006
epidermal growth factor-containing fibulin-like extracellular matrix protein 2 [Source:MGI Symbol;Acc:MGI:1891209]	Efemp2	-0.410244	0.0001	-0.588993	0	-0.415151	0	-0.508412	0
family with sequence similarity 82, member A2 [Source:MGI Symbol;Acc:MGI:1915059]	Fam82a2	-0.588112	0	-0.500181	0	-0.575615	0	-0.50836	0.0001
cleavage stimulation factor, 3' pre-RNA subunit 2 [Source:MGI Symbol;Acc:MGI:1343054]	Cstf2	-0.754417	0	-1.26325	0	-0.419017	0	-0.508323	0
serine incorporator 3 [Source:MGI Symbol;Acc:MGI:1349457]	Serinc3	1.37981	0	2.22876	0	-0.295923	0.0029	-0.507923	0
methenyltetrahydrofolate synthetase domain containing [Source:MGI Symbol;Acc:MGI:2679252]	Mthfsd	-0.229705	1	-0.234516	1	0.0240643	1	-0.507849	0.0041
hydroxysteroid (17-beta) dehydrogenase 11 [Source:MGI Symbol;Acc:MGI:2149821]	Hsd17b11	1.55652	0	2.21225	0	-0.093134	1	-0.507413	1
solute carrier family 15 (H+/peptide transporter), member 2 [Source:MGI Symbol;Acc:MGI:1890457]	Slc15a2	2.33385	0	1.89639	0	-0.206271	1	-0.507052	0.0002
ferritin heavy chain 1 [Source:MGI Symbol;Acc:MGI:95588]	Fth1	0.313559	0.6646	1.79907	0	-0.175656	1	-0.507043	1
retinol binding protein 7, cellular [Source:MGI Symbol;Acc:MGI:1890409]	Rbp7	-0.0373133	1	-0.000819684	1	0.0928434	1	-0.506992	0.0059
high-mobility group nucleosome binding domain 5 [Source:MGI Symbol;Acc:MGI:1355295]	Hmgn5	0.647563	0	-0.270008	0.6738	-0.45268	0	-0.506435	0.0008
microsomal triglyceride transfer protein [Source:MGI Symbol;Acc:MGI:106926]	Mttp	0.285473	0.7362	0.304312	0.011	-0.27446	0.4221	-0.506094	0
UPF3 regulator of nonsense transcripts homolog A (yeast) [Source:MGI Symbol;Acc:MGI:1914281]	Upf3a	0.153818	1	0.181548	1	-0.314302	0.0084	-0.506043	0.0052
olfactory receptor 332 [Source:MGI Symbol;Acc:MGI:3030166]	Olfr332	0.0563338	1	0.0175941	1	-0.105891	1	-0.505959	0.0022
cDNA sequence BC029214 [Source:MGI Symbol;Acc:MGI:2442831]	BC029214	-0.577323	0	-0.7355	0	-0.157599	1	-0.505933	0
ATP/GTP binding protein-like 3 [Source:MGI Symbol;Acc:MGI:1923473]	Agbl3	-0.950882	0	-1.75743	0	-0.266319	0.2541	-0.505822	0.0006
metastasis associated in colon cancer 1 [Source:MGI Symbol;Acc:MGI:2685113]	Macc1	-0.0789979	1	-0.724449	0	-0.706138	0	-0.505494	0
structural maintenance of chromosomes 2 [Source:MGI Symbol;Acc:MGI:106067]	Smc2	-0.925125	0	-3.73738	0	-0.476599	0	-0.505441	0.0003
plexin B1 [Source:MGI Symbol;Acc:MGI:2154238]	Plxnb1	-0.478137	0.0016	-0.4409	0	-0.186515	1	-0.505023	0
NIMA (never in mitosis gene a)-related expressed kinase 6 [Source:MGI Symbol;Acc:MGI:1891638]	Nek6	-0.787926	0	-0.544458	0	-0.489625	0	-0.504503	0.0005
CD320 antigen [Source:MGI Symbol;Acc:MGI:1860083]	Cd320	-0.138937	1	-0.440543	0.0068	-0.339318	0.2434	-0.504495	0.1777
predicted gene 5331 [Source:MGI Symbol;Acc:MGI:3647739]	Gm5331	0.0177509	1	-0.0133721	1	-0.248216	0.8868	-0.504299	0.0004
transmembrane protein 238 [Source:MGI Symbol;Acc:MGI:1922935]	Tmem238	-0.93373	0	-1.83774	0	-0.297082	0.0585	-0.50372	0
Wolf-Hirschhorn syndrome candidate 1 (human) [Source:MGI Symbol;Acc:MGI:1276574]	Whsc1	-1.07138	0	-2.25876	0	-0.499796	0	-0.503112	0
tRNA-yW synthesizing protein 1 homolog (S. cerevisiae) [Source:MGI Symbol;Acc:MGI:2141161]	Tyw1	0.197563	1	0.814247	0	-0.455673	0.0001	-0.502822	0
signal sequence receptor, gamma [Source:MGI Symbol;Acc:MGI:1914687]	Ssr3	-0.265547	1	-0.682833	0	-0.644068	0	-0.502622	0.0006
taurine upregulated gene 1 [Source:MGI Symbol;Acc:MGI:2144114]	Tug1	0.402187	0.0382	0.79008	0	-0.362638	0.0006	-0.502587	0
brain derived neurotrophic factor [Source:MGI Symbol;Acc:MGI:88145]	Bdnf	1.19492	0	1.99472	0	-0.154792	1	-0.501964	1
small nucleolar RNA host gene (non-protein coding) 3 [Source:MGI Symbol;Acc:MGI:2684817]	Snhg3	-0.745416	0	-1.5855	0	-0.516213	0.0001	-0.501786	0
serine incorporator 3 [Source:MGI Symbol;Acc:MGI:1349457]	Serinc3	1.45872	0	2.30997	0	-0.221911	1	-0.501663	0
radixin [Source:MGI Symbol;Acc:MGI:97887]	Rdx	-0.104705	1	-0.781526	0	-0.571159	0	-0.501586	0.0003
arginine/serine-rich coiled-coil 1 [Source:MGI Symbol;Acc:MGI:1914130]	Rsrc1	-0.374172	0.0001	-1.34138	0	-0.589791	0	-0.50148	0
RAB guanine nucleotide exchange factor (GEF) 1 [Source:MGI Symbol;Acc:MGI:1929459]	Rabgef1	-0.227513	1	0.0642207	1	-0.491618	0	-0.501318	0
fibronectin type III domain containing 3B [Source:MGI Symbol;Acc:MGI:1919257]	Fndc3b	-0.102702	1	0.402427	0	-0.37615	0.0241	-0.501292	0.0005
SECIS binding protein 2 [Source:MGI Symbol;Acc:MGI:1922670]	Secisbp2	-0.189978	1	0.144634	1	-0.48578	0	-0.501147	0
telomeric repeat binding factor 2, interacting protein [Source:MGI Symbol;Acc:MGI:1929871]	Terf2ip	-0.16625	1	-0.00355051	1	-0.521036	0	-0.499969	0.0003
quaking [Source:MGI Symbol;Acc:MGI:97837]	Qk	0.0386328	1	-0.651774	0	-0.522681	0	-0.499861	0
family with sequence similarity 82, member A2 [Source:MGI Symbol;Acc:MGI:1915059]	Fam82a2	-0.580291	0	-0.541689	0	-0.500785	0	-0.4997	0
microsomal glutathione S-transferase 1 [Source:MGI Symbol;Acc:MGI:1913850]	Mgst1	1.45938	0	2.59067	0	-0.18714	1	-0.499184	0
zinc finger protein 606 [Source:MGI Symbol;Acc:MGI:1914620]	Zfp606	-0.135605	1	-0.230326	1	-0.357672	0.015	-0.499039	0
golgi transport 1 homolog B (S. cerevisiae) [Source:MGI Symbol;Acc:MGI:1914214]	Golt1b	-0.760433	0	-0.377345	0.0132	-0.489783	0	-0.497759	0
family with sequence similarity 118, member A [Source:MGI Symbol;Acc:MGI:1920475]	Fam118a	0.372362	0.0562	-0.0524565	1	-0.714354	0	-0.497655	0
H2A histone family, member J [Source:MGI Symbol;Acc:MGI:3606192]	H2afj	-0.823882	0	-1.77918	0	-0.0623151	1	-0.49691	0
zinc finger protein 451 [Source:MGI Symbol;Acc:MGI:2137896]	Zfp451	0.050648	1	0.145691	1	-0.53246	0	-0.4968	0.0044
zinc finger protein 326 [Source:MGI Symbol;Acc:MGI:1927246]	Zfp326	0.677991	0	-0.433617	0.0187	-0.252121	0.0932	-0.496554	0
forkhead box O6 [Source:MGI Symbol;Acc:MGI:2676586]	Foxo6	-1.05057	0	-1.65138	0	-0.347155	0.9997	-0.496395	0.0065
family with sequence similarity 117, member B [Source:MGI Symbol;Acc:MGI:1920000]	Fam117b	0.358633	0.0159	0.327009	0.0625	-0.29613	0.558	-0.496372	0.0002
HID1 domain containing [Source:MGI Symbol;Acc:MGI:2445087]	Hid1	0.918172	0	1.48543	0	-0.112546	1	-0.496132	0
tetratricopeptide repeat domain 21B [Source:MGI Symbol;Acc:MGI:1920918]	Ttc21b	-0.62878	0	-0.670706	0	-0.42306	0	-0.496077	0
tubulin, delta 1 [Source:MGI Symbol;Acc:MGI:1891826]	Tubd1	-0.575639	0	-1.09737	0	-0.414636	0.0001	-0.496012	0.0008
CDGSH iron sulfur domain 2 [Source:MGI Symbol;Acc:MGI:1914256]	Cisd2	-0.0387071	1	0.110631	1	-0.353553	0.0058	-0.49599	0
actin related protein 2/3 complex, subunit 3 [Source:MGI Symbol;Acc:MGI:1928375]	Arpc3	0.439144	0	1.05335	0	-0.394411	0.0001	-0.495951	0
SKI/DACH domain containing 1 [Source:MGI Symbol;Acc:MGI:1919918]	Skida1	0.228997	1	0.273217	0.5142	-0.165014	1	-0.495097	0.0052
zinc finger protein 207 [Source:MGI Symbol;Acc:MGI:1340045]	Zfp207	-0.211144	0.9996	0.240986	0.9503	0.146733	1	-0.494635	0
ras homolog gene family, member T1 [Source:MGI Symbol;Acc:MGI:1926078]	Rhot1	-0.387897	0.0001	-0.481777	0	-0.454176	0	-0.494489	0
polyadenylate binding protein-interacting protein 1 [Source:MGI Symbol;Acc:MGI:2384993]	Paip1	0.184953	1	0.644244	0	-0.567815	0	-0.494487	0
MICAL-like 2 [Source:MGI Symbol;Acc:MGI:2444818]	Micall2	-0.559335	0	-0.215255	1	-0.310593	0.0086	-0.494387	0
expressed sequence AI314180 [Source:MGI Symbol;Acc:MGI:2140220]	AI314180	-0.428115	0	-0.696372	0	-0.413382	0.0007	-0.494229	0.0003
diacylglycerol kinase, alpha [Source:MGI Symbol;Acc:MGI:102952]	Dgka	1.36493	0	2.41403	0	-0.337133	0.0001	-0.494144	0.0001
mitochondrial ribosomal protein S6 [Source:MGI Symbol;Acc:MGI:2153111]	Mrps6	-0.616333	0	-0.736129	0	-0.452057	0	-0.494038	0
ecotropic viral integration site 5 [Source:MGI Symbol;Acc:MGI:104736]	Evi5	0.00496873	1	-0.167996	1	-0.453399	0	-0.493741	0
insulin degrading enzyme [Source:MGI Symbol;Acc:MGI:96412]	Ide	-0.148663	1	1.72228	0	-0.2641	0.2524	-0.493638	0
serine/arginine-rich splicing factor 2 [Source:MGI Symbol;Acc:MGI:98284]	Srsf2	-1.40298	0	-1.71993	0	-0.231679	0.3706	-0.493516	0.0016
fucosyltransferase 8 [Source:MGI Symbol;Acc:MGI:1858901]	Fut8	0.941827	0	0.429868	0.0043	-0.0940222	1	-0.4935	0.0001
SET domain containing 5 [Source:MGI Symbol;Acc:MGI:1920145]	Setd5	0.145951	1	-0.0686195	1	-0.485198	0	-0.493362	0
homeodomain leucine zipper-encoding gene [Source:MGI Symbol;Acc:MGI:2678023]	Homez	0.212009	1	0.912558	0	-0.0352923	1	-0.493179	0.0765
ankyrin repeat domain 44 [Source:MGI Symbol;Acc:MGI:3045243]	Ankrd44	0.412879	0	0.622312	0.0011	-0.152034	1	-0.492775	0.5272
T-box 3 [Source:MGI Symbol;Acc:MGI:98495]	Tbx3	0.663846	0	0.751121	0	-0.313126	1	-0.49274	0.0059
fatty acyl CoA reductase 1 [Source:MGI Symbol;Acc:MGI:1914670]	Far1	-0.723341	0	-0.698227	0	-0.411702	0.1007	-0.492687	0.9283
arginine/serine-rich coiled-coil 1 [Source:MGI Symbol;Acc:MGI:1914130]	Rsrc1	-0.375244	0.0001	-1.31646	0	-0.566455	0	-0.492639	0
UTP3, small subunit (SSU) processome component, homolog (S. cerevisiae) [Source:MGI Symbol;Acc:MGI:1919230]	Utp3	-0.313325	0.0334	-0.326102	0.0014	-0.509348	0	-0.49206	0
amyloid beta (A4) precursor-like protein 2 [Source:MGI Symbol;Acc:MGI:88047]	Aplp2	0.606044	0	1.32861	0	-0.228679	0.9848	-0.491969	0.0002
RAB2A, member RAS oncogene family [Source:MGI Symbol;Acc:MGI:1928750]	Rab2a	0.30786	0.1145	0.202073	1	-0.427052	0	-0.491863	0
S100 calcium binding protein A4 [Source:MGI Symbol;Acc:MGI:1330282]	S100a4	0.190084	1	0.25382	1	-0.0946275	1	-0.490639	0.0005
syntaxin 2 [Source:MGI Symbol;Acc:MGI:108059]	Stx2	-0.0486912	1	0.167075	1	-0.458325	0.0224	-0.49041	0.0014
rcd1 (required for cell differentiation) homolog 1 (S. pombe) [Source:MGI Symbol;Acc:MGI:1928902]	Rqcd1	-0.578344	0	-0.875714	0	-0.357888	0.0025	-0.490274	0
tRNA nucleotidyl transferase, CCA-adding, 1 [Source:MGI Symbol;Acc:MGI:1917297]	Trnt1	-0.0968584	1	-0.112428	1	-0.724914	0	-0.490051	0
1-acylglycerol-3-phosphate O-acyltransferase 6 (lysophosphatidic acid acyltransferase, zeta) [Source:MGI Symbol;Acc:MGI:2142716]	Agpat6	-0.423182	0.0253	-0.550585	0	-0.398311	0.2198	-0.48967	0.0037
bestrophin 1 [Source:MGI Symbol;Acc:MGI:1346332]	Best1	-0.381237	0.9719	-1.85145	0	-0.280035	1	-0.489634	0.0016
striatin, calmodulin binding protein 3 [Source:MGI Symbol;Acc:MGI:2151064]	Strn3	0.352295	0.0132	0.163834	1	-0.575448	0	-0.489597	0
isovaleryl coenzyme A dehydrogenase [Source:MGI Symbol;Acc:MGI:1929242]	Ivd	-0.885494	0	-0.307121	0.5778	-0.204447	1	-0.489405	0.0016
zinc finger protein 629 [Source:MGI Symbol;Acc:MGI:2444524]	Zfp629	-0.0762012	1	0.166831	1	-0.315192	0.2737	-0.489316	0.0003
histone aminotransferase 1 [Source:MGI Symbol;Acc:MGI:96013]	Hat1	-0.914431	0	-3.35394	0	-0.356968	0	-0.488358	0
structural maintenance of chromosomes 2 [Source:MGI Symbol;Acc:MGI:106067]	Smc2	-0.926934	0	-3.27039	0	-0.46335	0	-0.488323	0.0311
galactose-4-epimerase, UDP [Source:MGI Symbol;Acc:MGI:1921496]	Gale	-0.405948	0.0001	-0.581424	0	-0.274466	0.0364	-0.488269	0
PRELI domain containing 2 [Source:MGI Symbol;Acc:MGI:1924869]	Prelid2	-0.336482	0.0788	-0.998169	0	-0.259249	0.5585	-0.488255	0
insulin receptor substrate 1 [Source:MGI Symbol;Acc:MGI:99454]	Irs1	-0.0494614	1	-0.697893	0	-0.565669	0	-0.487777	0
RAB2A, member RAS oncogene family [Source:MGI Symbol;Acc:MGI:1928750]	Rab2a	0.320334	0.1642	0.227803	1	-0.413524	0	-0.487069	0
SH2 domain containing 4A [Source:MGI Symbol;Acc:MGI:1919531]	Sh2d4a	0.811339	0	1.24268	0	-0.673099	0	-0.486513	0
histone cluster 1, H1c [Source:MGI Symbol;Acc:MGI:1931526]	Hist1h1c	-0.117564	1	2.66641	0	-0.346287	0.0029	-0.486489	0.0279
zinc finger protein 503 [Source:MGI Symbol;Acc:MGI:1353644]	Zfp503	-0.361555	0.9994	-0.546033	0.0007	-0.294438	1	-0.486376	0.7668
YTH domain family 1 [Source:MGI Symbol;Acc:MGI:1917431]	Ythdf1	-0.319778	0.0353	-0.265308	0.6734	-0.477577	0	-0.486071	0
p21 protein (Cdc42/Rac)-activated kinase 3 [Source:MGI Symbol;Acc:MGI:1339656]	Pak3	-0.361479	0.0015	0.0764633	1	-0.829155	0	-0.485889	0
killer cell lectin-like receptor, subfamily A, member 7 [Source:MGI Symbol;Acc:MGI:101901]	Klra7	-0.388355	0.9924	-0.657978	0.0017	-0.263492	1	-0.485422	0.0022
deoxyhypusine synthase [Source:MGI Symbol;Acc:MGI:2683592]	Dhps	0.0273239	1	-0.0909735	1	-0.667005	0	-0.485408	0
hydroxysteroid (17-beta) dehydrogenase 11 [Source:MGI Symbol;Acc:MGI:2149821]	Hsd17b11	1.4853	0	2.11283	0	-0.0323784	1	-0.485053	0.1011
synaptojanin 2 binding protein [Source:MGI Symbol;Acc:MGI:1344347]	Synj2bp	0.57022	0	0.608781	0	-0.35062	0.0005	-0.484998	0
ubiquitin-conjugating enzyme E2F (putative) [Source:MGI Symbol;Acc:MGI:1915171]	Ube2f	0.973949	0	1.27382	0	-0.497134	0	-0.484919	0
neuralized homolog 1b (Drosophila) [Source:MGI Symbol;Acc:MGI:3643092]	Neurl1b	-0.716393	0	-1.82466	0	-0.479205	0.0001	-0.484752	0.0001
SET binding factor 2 [Source:MGI Symbol;Acc:MGI:1921831]	Sbf2	-0.274711	0.9998	-0.62469	0	-0.647938	0.0001	-0.484294	0.1615
alanine-glyoxylate aminotransferase 2-like 2 [Source:MGI Symbol;Acc:MGI:1920197]	Agxt2l2	-0.0605056	1	-0.458307	0	-0.361327	0.1644	-0.484211	0
akirin 1 [Source:MGI Symbol;Acc:MGI:1915300]	Akirin1	0.0230282	1	0.229366	1	-0.516987	0	-0.483761	0
IKAROS family zinc finger 2 [Source:MGI Symbol;Acc:MGI:1342541]	Ikzf2	0.523191	0.0001	0.677928	0	-0.242468	1	-0.483638	0.0286
ubiquitin-conjugating enzyme E2N [Source:MGI Symbol;Acc:MGI:1934835]	Ube2n	0.144321	1	0.274804	0.5784	-0.408167	0.0042	-0.483305	0.2607
amplified in osteosarcoma [Source:MGI Symbol;Acc:MGI:1924301]	Os9	0.438091	0.0857	1.11527	0	-0.369971	0.0116	-0.483295	0.0167
ubiquitin protein ligase E3A [Source:MGI Symbol;Acc:MGI:105098]	Ube3a	0.412944	0.0001	0.141786	1	-0.496417	0	-0.483202	0
kallikrein related-peptidase 8 [Source:MGI Symbol;Acc:MGI:1343327]	Klk8	-0.0911671	1	0.641962	0	-0.0409599	1	-0.483013	0.9918
MAP kinase-interacting serine/threonine kinase 1 [Source:MGI Symbol;Acc:MGI:894316]	Mknk1	0.464606	0	0.645702	0	-0.431571	0.0001	-0.482746	0.0001
TSR2, 20S rRNA accumulation, homolog (S. cerevisiae) [Source:MGI Symbol;Acc:MGI:1916749]	Tsr2	-0.299866	1	-0.622567	0.6833	-0.427756	0	-0.48265	0.0231
lactate dehydrogenase A [Source:MGI Symbol;Acc:MGI:96759]	Ldha	-0.931847	0	-2.70869	0	-0.164099	1	-0.48242	1
ring finger protein 114 [Source:MGI Symbol;Acc:MGI:1933159]	Rnf114	-0.320519	0.9952	0.543773	0	-0.360759	0.0024	-0.482253	0.0006
uridine-cytidine kinase 2 [Source:MGI Symbol;Acc:MGI:1931744]	Uck2	-1.02249	0	-1.20919	0	-0.411468	0.0011	-0.482245	0
RIKEN cDNA 2310079F23 gene [Source:MGI Symbol;Acc:MGI:1926140]	2310079F23Rik	-0.208401	1	-0.160452	1	-0.0748938	1	-0.482037	1
TAF10 RNA polymerase II, TATA box binding protein (TBP)-associated factor [Source:MGI Symbol;Acc:MGI:1346320]	Taf10	0.0606008	1	0.495971	0.0012	0.0112237	1	-0.481807	0
PITH (C-terminal proteasome-interacting domain of thioredoxin-like) domain containing 1 [Source:MGI Symbol;Acc:MGI:1913443]	Pithd1	-0.673665	0	-1.44708	0	-0.506078	0	-0.48162	0.0414
GA repeat binding protein, alpha [Source:MGI Symbol;Acc:MGI:95610]	Gabpa	-0.165732	1	-0.675618	0	-0.311778	0.793	-0.481493	0
INO80 complex subunit C [Source:MGI Symbol;Acc:MGI:2443014]	Ino80c	0.572395	0	0.347462	0.4446	-0.297381	0.0517	-0.481358	0
aldehyde dehydrogenase 16 family, member A1 [Source:MGI Symbol;Acc:MGI:1916998]	Aldh16a1	0.0515252	1	-0.560428	0	-0.479651	0	-0.48128	0.0001
microtubule-associated protein, RP/EB family, member 1 [Source:MGI Symbol;Acc:MGI:891995]	Mapre1	-0.315287	0.0613	-0.943675	0	-0.357711	0.0161	-0.481183	0
RIKEN cDNA C130073F10 gene [Source:MGI Symbol;Acc:MGI:3045359]	C130073F10Rik	-0.14611	1	1.20628	0	-0.0988439	1	-0.480661	0.0002
SET and MYND domain containing 2 [Source:MGI Symbol;Acc:MGI:1915889]	Smyd2	-0.78702	0	-1.09231	0	-0.441566	0	-0.480641	0.0008
predicted gene 9746 [Source:MGI Symbol;Acc:MGI:3710397]	Gm9746	0.0368479	1	-0.342247	0.0019	-0.2388	1	-0.480545	0
tribbles homolog 3 (Drosophila) [Source:MGI Symbol;Acc:MGI:1345675]	Trib3	-0.550795	0	-2.08533	0	-0.85857	0	-0.480444	0.0006
isopentenyl-diphosphate delta isomerase [Source:MGI Symbol;Acc:MGI:2442264]	Idi1	-0.907384	0	-2.97565	0	-0.600884	0	-0.480323	0
THAP domain containing, apoptosis associated protein 2 [Source:MGI Symbol;Acc:MGI:1914066]	Thap2	-0.695863	0	-0.723017	0	-0.208523	1	-0.480209	0
expressed sequence AI314180 [Source:MGI Symbol;Acc:MGI:2140220]	AI314180	-0.254215	1	-0.0394112	1	-0.371486	0	-0.480194	0.0002
phosphatidic acid phosphatase type 2C [Source:MGI Symbol;Acc:MGI:1354945]	Ppap2c	-0.955771	0	-1.29492	0	-0.192116	1	-0.48019	0.0003
tropomyosin 2, beta [Source:MGI Symbol;Acc:MGI:98810]	Tpm2	-0.0131813	1	0.357361	0.274	-0.137313	1	-0.479796	0
DEAD (Asp-Glu-Ala-Asp) box polypeptide 18 [Source:MGI Symbol;Acc:MGI:1914192]	Ddx18	-1.00662	0	-1.29669	0	-0.394934	0.0006	-0.479786	0
La ribonucleoprotein domain family, member 7 [Source:MGI Symbol;Acc:MGI:107634]	Larp7	-0.349331	0.0015	-1.33707	0	-0.422364	0	-0.479537	0
bromodomain and WD repeat domain containing 3 [Source:MGI Symbol;Acc:MGI:3029414]	Brwd3	0.260339	1	0.355467	0.0008	-0.269044	1	-0.47947	0
N(alpha)-acetyltransferase 30, NatC catalytic subunit [Source:MGI Symbol;Acc:MGI:1922259]	Naa30	0.266001	0.8865	0.118147	1	-0.652452	0	-0.479464	0
family with sequence similarity 132, member B [Source:MGI Symbol;Acc:MGI:3606476]	Fam132b	-0.724709	0	-2.46112	0	-0.499377	0	-0.479454	0.0012
GATA zinc finger domain containing 2B [Source:MGI Symbol;Acc:MGI:2443225]	Gatad2b	0.301272	0.9919	0.58677	0	-0.441917	0.0001	-0.479406	0.0582
peptidyl arginine deiminase, type II [Source:MGI Symbol;Acc:MGI:1338892]	Padi2	0.125638	1	0.484633	0	0.0562783	1	-0.478953	0.4794
mitochondrial ribosomal protein S6 [Source:MGI Symbol;Acc:MGI:2153111]	Mrps6	-0.567545	0	-0.769748	0	-0.448125	0	-0.478762	0
succinate dehydrogenase complex, subunit B, iron sulfur (Ip) [Source:MGI Symbol;Acc:MGI:1914930]	Sdhb	0.0529166	1	-0.0513334	1	-0.476791	0	-0.478706	0
alpha thalassemia/mental retardation syndrome X-linked homolog (human) [Source:MGI Symbol;Acc:MGI:103067]	Atrx	-0.0369195	1	-0.0445503	1	-0.222448	1	-0.478171	0.0036
ankyrin repeat domain 37 [Source:MGI Symbol;Acc:MGI:3603344]	Ankrd37	-1.4302	0	-1.6234	0	0.429718	0.0001	-0.477984	0.0054
DBF4 homolog (S. cerevisiae) [Source:MGI Symbol;Acc:MGI:1351328]	Dbf4	-0.283388	0.1527	-1.92128	0	-0.601985	0	-0.477701	0
predicted gene 20533 [Source:MGI Symbol;Acc:MGI:5141998]	Gm20533	-0.301696	0.6325	-0.991545	0	-0.143352	1	-0.477645	0.0353
pyruvate dehydrogenase E1 alpha 1 [Source:MGI Symbol;Acc:MGI:97532]	Pdha1	-0.271764	0.3871	-0.748609	0	-0.411531	0.0002	-0.477581	0
COMM domain containing 3 [Source:MGI Symbol;Acc:MGI:88218]	Commd3	0.155335	1	0.191386	1	-0.474609	0	-0.477207	0
tRNA nucleotidyl transferase, CCA-adding, 1 [Source:MGI Symbol;Acc:MGI:1917297]	Trnt1	-0.131498	1	-0.165998	1	-0.727905	0	-0.477022	0.0076
sarcospan [Source:MGI Symbol;Acc:MGI:1353511]	Sspn	0.0600197	1	-0.342506	0.0218	-0.0667597	1	-0.47693	0.9003
Dmx-like 2 [Source:MGI Symbol;Acc:MGI:2444630]	Dmxl2	0.0789923	1	0.182489	1	0.0555844	1	-0.47644	1
granulin [Source:MGI Symbol;Acc:MGI:95832]	Grn	0.505952	0.0001	0.831577	0	-0.0440876	1	-0.476412	0.0002
ubiquitin-conjugating enzyme E2 variant 2 [Source:MGI Symbol;Acc:MGI:1917870]	Ube2v2	-0.644456	0	-1.15875	0	-0.752323	0	-0.47632	0.0794
ribonucleotide reductase M2 [Source:MGI Symbol;Acc:MGI:98181]	Rrm2	-3.45233	0	-4.21012	0	-0.359533	0.0216	-0.475995	0
glutamyl-tRNA(Gln) amidotransferase, subunit C homolog (bacterial) [Source:MGI Symbol;Acc:MGI:1923776]	Gatc	-0.218751	1	-0.631654	0	-0.354819	0.9998	-0.475754	0.0091
SRY-box containing gene 11 [Source:MGI Symbol;Acc:MGI:98359]	Sox11	-1.68424	0	-1.90211	0	-0.368383	0.042	-0.475457	0.0016
solute carrier family 15, member 4 [Source:MGI Symbol;Acc:MGI:2140796]	Slc15a4	-0.0992734	1	0.0172093	1	-0.202091	1	-0.47518	0
family with sequence similarity 123, member B [Source:MGI Symbol;Acc:MGI:1919595]	Fam123b	-0.548337	0.0169	-0.574229	0	-0.285282	0.0991	-0.475132	0.028
peroxiredoxin 2 [Source:MGI Symbol;Acc:MGI:109486]	Prdx2	0.198067	1	0.516711	0	-0.223231	1	-0.475088	0
VCP-interacting membrane protein [Source:MGI Symbol;Acc:MGI:95994]	Vimp	-0.464371	0.0001	-0.159236	1	-0.392898	0.0241	-0.475078	0
splicing factor 3b, subunit 2 [Source:MGI Symbol;Acc:MGI:2441856]	Sf3b2	-0.30796	0.0744	-0.439152	0.0001	-0.410701	0	-0.474861	0
ubiquitin-conjugating enzyme E2N [Source:MGI Symbol;Acc:MGI:1934835]	Ube2n	-0.296711	0.5232	-0.683194	0	-0.379611	0.0001	-0.474611	0
general transcription factor II I [Source:MGI Symbol;Acc:MGI:1202722]	Gtf2i	-1.41371	0	-1.36733	0	-0.254009	0.9996	-0.473807	0
procollagen lysine, 2-oxoglutarate 5-dioxygenase 2 [Source:MGI Symbol;Acc:MGI:1347007]	Plod2	-0.0593175	1	-0.347081	0.0037	-0.28048	0.2775	-0.473725	0
intraflagellar transport 122 [Source:MGI Symbol;Acc:MGI:1932386]	Ift122	0.629986	0	1.37007	0	-0.00317309	1	-0.473679	0.0783
peroxiredoxin 2 [Source:MGI Symbol;Acc:MGI:109486]	Prdx2	0.194919	1	0.451182	0.1125	-0.186324	1	-0.473478	0.0001
sphingosine phosphate lyase 1 [Source:MGI Symbol;Acc:MGI:1261415]	Sgpl1	0.328136	0.0047	1.2732	0	-0.52777	0	-0.47337	0.0002
mex3 homolog A (C. elegans) [Source:MGI Symbol;Acc:MGI:1919890]	Mex3a	-1.21303	0	-0.738907	0	-0.439123	0.0005	-0.473322	0
RIKEN cDNA 2010107H07 gene [Source:MGI Symbol;Acc:MGI:1913737]	2010107H07Rik	-0.594123	0	-1.32541	0	-0.422037	0	-0.473268	0
zinc finger protein 422 [Source:MGI Symbol;Acc:MGI:1914505]	Zfp422	0.371291	0.1003	0.242962	0.9964	-0.257499	1	-0.47314	0
tRNA methyltransferase 10 homolog A (S. cerevisiae) [Source:MGI Symbol;Acc:MGI:1920421]	Trmt10a	-0.8117	0	-1.35604	0	-0.479794	0	-0.472892	0
abl-interactor 1 [Source:MGI Symbol;Acc:MGI:104913]	Abi1	0.472072	0.0001	0.601126	0	-0.520345	0	-0.472802	0
RIKEN cDNA 2410018L13 gene [Source:MGI Symbol;Acc:MGI:1916982]	2410018L13Rik	-0.44452	0.0001	-1.2186	0	-0.196922	1	-0.472659	0.4193
DDB1 and CUL4 associated factor 12 [Source:MGI Symbol;Acc:MGI:1916220]	Dcaf12	0.525708	0	1.14181	0	-0.472325	0	-0.472399	0
tweety homolog 3 (Drosophila) [Source:MGI Symbol;Acc:MGI:1925589]	Ttyh3	-1.19802	0	-2.23295	0	-0.202442	1	-0.472163	0.0008
regulation of nuclear pre-mRNA domain containing 1A [Source:MGI Symbol;Acc:MGI:2385066]	Rprd1a	0.0651035	1	0.48194	0.0002	-0.294457	0.0375	-0.471959	0
H6 homeobox 3 [Source:MGI Symbol;Acc:MGI:107160]	Hmx3	-0.625131	0	-1.22926	0	-0.045555	1	-0.471945	0
transforming growth factor, beta receptor I [Source:MGI Symbol;Acc:MGI:98728]	Tgfbr1	-0.573001	0	-1.00591	0	-0.531502	0	-0.471063	0
zinc finger protein 148 [Source:MGI Symbol;Acc:MGI:1332234]	Zfp148	0.162829	1	-0.366122	0.0001	-0.391811	0.0004	-0.470957	0
CGG triplet repeat binding protein 1 [Source:MGI Symbol;Acc:MGI:2146370]	Cggbp1	0.24145	1	0.557983	0.0057	-0.133059	1	-0.470935	0
alkB, alkylation repair homolog 5 (E. coli) [Source:MGI Symbol;Acc:MGI:2144489]	Alkbh5	-0.585546	0	-0.428857	0.7858	-0.443114	0.0011	-0.470657	0.0127
transcription elongation factor B (SIII), polypeptide 3 [Source:MGI Symbol;Acc:MGI:1351315]	Tceb3	0.119927	1	0.766197	0	-0.673345	0	-0.470635	0
melanoma inhibitory activity protein 3 precursor [Source:RefSeq peptide;Acc:NP_796363]	MIA3	-0.0655228	1	0.0674322	1	-0.474805	0	-0.470573	0
olfactory receptor 1165, pseudogene [Source:MGI Symbol;Acc:MGI:3030999]	Olfr1165-ps	-0.28957	0.5406	-0.756555	0	-0.397268	0	-0.470569	0
guanine nucleotide binding protein, alpha q polypeptide [Source:MGI Symbol;Acc:MGI:95776]	Gnaq	-0.079786	1	-0.281386	0.7824	-0.188261	1	-0.470417	0
RIKEN cDNA 1500012F01 gene [Source:MGI Symbol;Acc:MGI:1916199]	1500012F01Rik	-0.662307	0	-1.16432	0	-0.394289	0.0152	-0.469709	0.0023
protein phosphatase 1A, magnesium dependent, alpha isoform [Source:MGI Symbol;Acc:MGI:99878]	Ppm1a	0.777519	0	0.815026	0	-0.349767	0.9943	-0.469346	0
aldolase C, fructose-bisphosphate [Source:MGI Symbol;Acc:MGI:101863]	Aldoc	0.806143	0	0.983948	0	0.0948441	1	-0.469306	0.4194
nudix (nucleoside diphosphate linked moiety X)-type motif 2 [Source:MGI Symbol;Acc:MGI:1913651]	Nudt2	-0.254396	0.8052	-0.45434	0	-0.427056	0	-0.468887	0
Kazal-type serine peptidase inhibitor domain 1 [Source:MGI Symbol;Acc:MGI:2147606]	Kazald1	-0.0226234	1	0.109762	1	-0.087272	1	-0.468827	0.1921
transcription factor Dp 2 [Source:MGI Symbol;Acc:MGI:107167]	Tfdp2	0.0286257	1	-0.721171	0	-0.427271	0	-0.468519	0.001
ADP-ribosylation factor-like 5A [Source:MGI Symbol;Acc:MGI:1922673]	Arl5a	-0.00778846	1	-0.532145	0	-0.231012	0.9999	-0.468439	0
coatomer protein complex, subunit epsilon [Source:MGI Symbol;Acc:MGI:1891702]	Cope	-0.0616058	1	0.132551	1	-0.263328	0.5362	-0.468397	0
CAS1 domain containing 1 [Source:MGI Symbol;Acc:MGI:2384865]	Casd1	-0.238352	0.9998	-0.158938	1	-0.241692	0.8526	-0.468356	0
interferon activated gene 202B [Source:MGI Symbol;Acc:MGI:1347083]	Ifi202b	1.93794	0	3.79119	0	-0.280016	0.9321	-0.468226	0.0003
NOP10 ribonucleoprotein homolog (yeast) [Source:MGI Symbol;Acc:MGI:1913431]	Nop10	-0.205951	1	-0.609579	0	-0.305081	0.827	-0.467464	0.0002
structural maintenance of chromosomes 2 [Source:MGI Symbol;Acc:MGI:106067]	Smc2	-0.962407	0	-2.95196	0	-0.409801	0.0006	-0.46743	0.0006
dynein light chain LC8-type 1 [Source:MGI Symbol;Acc:MGI:1861457]	Dynll1	-0.546743	0	-0.906975	0	-0.265539	0.1384	-0.467354	0
transforming growth factor beta regulated gene 4 [Source:MGI Symbol;Acc:MGI:1100868]	Tbrg4	-0.835631	0	-1.25637	0	-0.554085	0	-0.467176	0
cytokine receptor-like factor 1 [Source:MGI Symbol;Acc:MGI:1340030]	Crlf1	-0.25493	1	-0.791635	0.0055	-0.0808171	1	-0.46715	1
RIKEN cDNA C130071C03 gene [Source:MGI Symbol;Acc:MGI:2443574]	C130071C03Rik	0.246445	1	-0.123337	1	-0.227542	1	-0.466273	0.1083
transketolase [Source:MGI Symbol;Acc:MGI:105992]	Tkt	-0.30499	0.8315	-1.04095	0	-0.137616	1	-0.465956	0
phosphoribosyl pyrophosphate synthetase-associated protein 1 [Source:MGI Symbol;Acc:MGI:1915013]	Prpsap1	-0.0797585	1	-0.180028	1	-0.351846	0.1228	-0.4656	0.0019
RIKEN cDNA 1700125H20 gene [Source:MGI Symbol;Acc:MGI:1920884]	1700125H20Rik	-0.259128	0.9986	-0.536447	0	-0.388809	1	-0.465448	0.8561
solute carrier family 25 (mitochondrial carrier, dicarboxylate transporter), member 10 [Source:MGI Symbol;Acc:MGI:1353497]	Slc25a10	-0.767776	0	-1.82169	0	-0.244497	0.4556	-0.464958	0
TBC1 domain family, member 9B [Source:MGI Symbol;Acc:MGI:1924045]	Tbc1d9b	0.0310564	1	0.162893	1	-0.315734	0.4219	-0.464582	0.9324
RIKEN cDNA D730039F16 gene [Source:MGI Symbol;Acc:MGI:1925246]	D730039F16Rik	1.02713	0	1.20405	0	-0.583169	0	-0.464329	0.0003
	AC129605.1	0.195914	1	0.0585105	1	-0.541799	0	-0.464307	0.9565
fucosyltransferase 8 [Source:MGI Symbol;Acc:MGI:1858901]	Fut8	0.998564	0	0.448478	0	-0.120929	1	-0.463959	0.0022
phosphatidylinositol glycan anchor biosynthesis, class Y [Source:MGI Symbol;Acc:MGI:1913709]	Pigy	0.0704305	1	0.0233405	1	-0.306127	0.157	-0.463615	0.0002
RB1-inducible coiled-coil 1 [Source:MGI Symbol;Acc:MGI:1341850]	Rb1cc1	1.59563	0	2.30962	0	-0.144621	1	-0.463464	0
sterol carrier protein 2, liver [Source:MGI Symbol;Acc:MGI:98254]	Scp2	0.884692	0	1.16822	0	-0.225439	0.8083	-0.463239	0.0002
ATPase, class II, type 9A [Source:MGI Symbol;Acc:MGI:1330826]	Atp9a	0.126101	1	0.7223	0	-0.0335533	1	-0.462724	0.0016
leucine rich adaptor protein 1 [Source:MGI Symbol;Acc:MGI:1915325]	Lurap1	-0.208743	1	0.189515	1	-0.335839	0.0688	-0.462541	0.0006
neural precursor cell expressed, developmentally down-regulated 4 [Source:MGI Symbol;Acc:MGI:97297]	Nedd4	0.050648	1	0.515329	0	-0.209803	1	-0.462195	0.0093
YME1-like 1 (S. cerevisiae) [Source:MGI Symbol;Acc:MGI:1351651]	Yme1l1	0.141982	1	0.252622	0.2051	-0.511771	0	-0.461949	0
InaD-like (Drosophila) [Source:MGI Symbol;Acc:MGI:1277960]	Inadl	0.314847	0.2084	1.19704	0	-0.290399	0.999	-0.461396	0.0002
programmed cell death 6 interacting protein [Source:MGI Symbol;Acc:MGI:1333753]	Pdcd6ip	-0.0618874	1	0.152547	1	-0.543028	0	-0.461378	0.0253
zinc and ring finger 2 [Source:MGI Symbol;Acc:MGI:1196246]	Znrf2	1.26372	0	1.52984	0	-0.459941	0	-0.461311	0
mitogen-activated protein kinase associated protein 1 [Source:MGI Symbol;Acc:MGI:2444554]	Mapkap1	0.288524	0.256	0.530001	0	-0.384923	0	-0.460922	0
aldo-keto reductase family 1, member B3 (aldose reductase) [Source:MGI Symbol;Acc:MGI:1353494]	Akr1b3	-0.546547	0	-2.11221	0	-0.840094	0	-0.460826	0
sphingosine phosphate lyase 1 [Source:MGI Symbol;Acc:MGI:1261415]	Sgpl1	0.252609	1	1.00424	0	-0.340185	0.995	-0.460667	0.7678
RIKEN cDNA A730090H04 gene [Source:MGI Symbol;Acc:MGI:2444057]	A730090H04Rik	-0.519731	0	-0.477544	0.0005	-0.188565	1	-0.46063	0.0009
phenylalkylamine Ca2+ antagonist (emopamil) binding protein [Source:MGI Symbol;Acc:MGI:107822]	Ebp	0.810945	0	1.04424	0	-0.355782	0.0014	-0.459945	0
RIKEN cDNA 3110039M20 gene [Source:MGI Symbol;Acc:MGI:1914543]	3110039M20Rik	-0.0688692	1	-0.303274	0.9318	-0.409727	0.0535	-0.45934	0.9976
ring finger protein 169 [Source:MGI Symbol;Acc:MGI:1920257]	Rnf169	0.1957	1	0.579248	0	-0.259097	0.5122	-0.459011	0.0002
Hedgehog-interacting protein [Source:MGI Symbol;Acc:MGI:1341847]	Hhip	-1.34338	0	-1.63992	0	0.110403	1	-0.459003	1
E2F transcription factor 5 [Source:MGI Symbol;Acc:MGI:105091]	E2f5	-0.290734	0.9525	-0.38441	0	-0.244678	1	-0.458967	0.0018
PRP39 pre-mRNA processing factor 39 homolog (yeast) [Source:MGI Symbol;Acc:MGI:104602]	Prpf39	-0.155166	1	-0.645295	0.011	-0.222709	0.7375	-0.45838	0.0067
sorting nexin family member 21 [Source:MGI Symbol;Acc:MGI:1917729]	Snx21	0.410015	0.0277	1.01976	0	-0.267865	1	-0.45837	0.1156
keratin 7 [Source:MGI Symbol;Acc:MGI:96704]	Krt7	-0.888082	0	-0.0488061	1	-0.447005	1	-0.457916	0.58
glucosamine-6-phosphate deaminase 2 [Source:MGI Symbol;Acc:MGI:1915230]	Gnpda2	1.22021	0	1.5706	0	-0.568045	0	-0.457413	0
ribosomal protein S7 [Source:MGI Symbol;Acc:MGI:1333818]	Rps7	-0.121527	1	-0.161997	1	-0.586313	0	-0.457316	0.147
NOP10 ribonucleoprotein homolog (yeast) [Source:MGI Symbol;Acc:MGI:1913431]	Nop10	-0.124119	1	-0.611026	0	-0.338995	0.0002	-0.457094	0
solute carrier family 25, member 35 [Source:MGI Symbol;Acc:MGI:1919248]	Slc25a35	0.996758	0	1.2976	0	0.0829205	1	-0.456813	0.001
ring finger protein 103 [Source:MGI Symbol;Acc:MGI:109483]	Rnf103	1.10534	0	1.51474	0	-0.374043	0.0045	-0.456581	0.0002
actin-related protein T2 [Source:MGI Symbol;Acc:MGI:1920603]	Actrt2	-0.0298222	1	-0.106026	1	-0.330463	0.0359	-0.456573	0
stonin 1 [Source:MGI Symbol;Acc:MGI:1924307]	Ston1	-0.0719989	1	-0.262159	0.9374	-0.4191	0.001	-0.45654	0
connective tissue growth factor [Source:MGI Symbol;Acc:MGI:95537]	Ctgf	4.49171	0	5.03729	0	-0.21153	1	-0.456504	0.5113
transient receptor potential cation channel, subfamily C, member 4 associated protein [Source:MGI Symbol;Acc:MGI:1930751]	Trpc4ap	0.943194	0	0.967124	0	-0.498358	1	-0.456249	1
PERP, TP53 apoptosis effector [Source:MGI Symbol;Acc:MGI:1929938]	Perp	0.996851	0	1.33081	0	-0.300873	0.9207	-0.456245	0.0016
phosphatidylinositol 3-kinase, regulatory subunit, polypeptide 1 (p85 alpha) [Source:MGI Symbol;Acc:MGI:97583]	Pik3r1	-1.02141	0	-0.928839	0	-0.365808	0.0001	-0.456077	0.0003
pleckstrin homology domain containing, family G (with RhoGef domain) member 2 [Source:MGI Symbol;Acc:MGI:2141874]	Plekhg2	-0.109363	1	-0.177692	1	-0.0486867	1	-0.455805	0.0867
cell division cycle 123 [Source:MGI Symbol;Acc:MGI:2138811]	Cdc123	-0.13405	1	-0.494221	0	-0.151942	1	-0.455768	0.0002
F-box protein 41 [Source:MGI Symbol;Acc:MGI:1261912]	Fbxo41	-0.00942846	1	0.0686983	1	-0.328158	0.0007	-0.455637	0
chemokine (C-C motif) receptor 10 [Source:MGI Symbol;Acc:MGI:1096320]	Ccr10	-0.242328	0.6593	-0.533927	0	-0.425966	0.0088	-0.455584	0.0018
inositol (myo)-1(or 4)-monophosphatase 2 [Source:MGI Symbol;Acc:MGI:2149728]	Impa2	-1.22065	0	-1.99017	0	-0.379293	0.0067	-0.455416	0.0002
zinc finger and BTB domain containing 12 [Source:MGI Symbol;Acc:MGI:88133]	Zbtb12	-0.544193	0.0183	-0.719932	0	-0.272787	0.78	-0.455412	0.0002
ubiquitin protein ligase E3A [Source:MGI Symbol;Acc:MGI:105098]	Ube3a	0.00742517	1	-0.261594	0.9658	-0.485291	0	-0.45519	0.226
H3 histone, family 3B [Source:MGI Symbol;Acc:MGI:1101768]	H3f3b	-0.819256	0	-1.31112	0	-0.283817	0.0201	-0.455166	0.0263
phosphatidylinositol glycan anchor biosynthesis, class Y [Source:MGI Symbol;Acc:MGI:1913709]	Pigy	-0.230306	1	-0.294284	0.2307	-0.307469	0.1364	-0.455129	0.0002
1-acylglycerol-3-phosphate O-acyltransferase 6 (lysophosphatidic acid acyltransferase, zeta) [Source:MGI Symbol;Acc:MGI:2142716]	Agpat6	-0.433867	0.0253	-0.537573	0.0005	-0.303128	0.9695	-0.455121	0.0037
ankyrin repeat and KH domain containing 1 [Source:MGI Symbol;Acc:MGI:1921733]	Ankhd1	-0.146397	1	0.407929	0.0011	-0.205114	1	-0.455012	0
bridging integrator 1 [Source:MGI Symbol;Acc:MGI:108092]	Bin1	-0.171833	1	0.254376	0.9643	-0.201385	1	-0.454971	0
ligand dependent nuclear receptor interacting factor 1 [Source:MGI Symbol;Acc:MGI:2445214]	Lrif1	0.806728	0	1.17825	0	-0.0389472	1	-0.454874	0
zinc finger, DHHC domain containing 20 [Source:MGI Symbol;Acc:MGI:1923215]	Zdhhc20	0.734569	0	1.0075	0	-0.340802	0.0022	-0.454799	0.0008
ankyrin repeat and LEM domain containing 1 [Source:MGI Symbol;Acc:MGI:1918775]	Ankle1	-0.63472	0.0012	-1.00306	0	-0.198173	1	-0.454362	0.0008
protein kinase C, iota [Source:MGI Symbol;Acc:MGI:99260]	Prkci	0.292146	0.0483	-0.0237288	1	-0.479999	0	-0.454158	0
EFR3 homolog A (S. cerevisiae) [Source:MGI Symbol;Acc:MGI:1923990]	Efr3a	-0.224204	0.9998	-0.497152	0	-0.377458	0	-0.4537	0.0001
regulator of chromosome condensation (RCC1) and BTB (POZ) domain containing protein 1 [Source:MGI Symbol;Acc:MGI:1918580]	Rcbtb1	-1.11581	0	-1.44332	0	-0.530554	0	-0.453135	0.0333
protein kinase, cAMP dependent, catalytic, beta [Source:MGI Symbol;Acc:MGI:97594]	Prkacb	0.0857646	1	0.306811	0.0392	-0.509005	0	-0.453044	0.0003
eukaryotic translation initiation factor 2-alpha kinase 2 [Source:MGI Symbol;Acc:MGI:1353449]	Eif2ak2	-0.0586307	1	1.91676	0	-0.239956	0.9997	-0.452864	0.3451
gem (nuclear organelle) associated protein 6 [Source:MGI Symbol;Acc:MGI:1914492]	Gemin6	-1.60862	0	-2.91001	0	-0.783382	0	-0.452734	0.0052
NAD(P)H dehydrogenase, quinone 2 [Source:MGI Symbol;Acc:MGI:104513]	Nqo2	0.80393	0	1.28669	0	-0.148418	1	-0.45272	0
cortactin [Source:MGI Symbol;Acc:MGI:99695]	Cttn	-0.235185	1	0.0118963	1	-0.096917	1	-0.452572	0.2902
histone cluster 2, H2aa1 [Source:MGI Symbol;Acc:MGI:96097]	Hist2h2aa1	-0.960808	0	-1.10088	0	-0.069573	1	-0.452426	0.0011
N-acylsphingosine amidohydrolase 2 [Source:MGI Symbol;Acc:MGI:1859310]	Asah2	0.541624	0.0002	0.465463	0.0001	-0.431324	0.0013	-0.45223	0.0002
tripartite motif-containing 17 [Source:MGI Symbol;Acc:MGI:1861440]	Trim17	-0.639849	0	-0.84151	0	-0.1067	1	-0.451885	0
mitochondrial ribosomal protein L36 [Source:MGI Symbol;Acc:MGI:2137228]	Mrpl36	-0.586724	0	-0.920161	0	-0.761206	0	-0.451877	0.0041
pantothenate kinase 3 [Source:MGI Symbol;Acc:MGI:2387464]	Pank3	0.254509	1	0.0431345	1	-0.418803	0.0028	-0.451591	0.0059
Iroquois related homeobox 1 (Drosophila) [Source:MGI Symbol;Acc:MGI:1197515]	Irx1	-0.00661113	1	0.227371	1	-0.233395	1	-0.451484	0.0002
ATP/GTP binding protein-like 3 [Source:MGI Symbol;Acc:MGI:1923473]	Agbl3	-0.804768	0	-1.45357	0	-0.208021	1	-0.451459	0.0954
RIKEN cDNA C130074G19 gene [Source:MGI Symbol;Acc:MGI:2444831]	C130074G19Rik	0.690051	0	1.36978	0	-0.155407	1	-0.451285	0.8091
DNA-damage regulated autophagy modulator 2 [Source:MGI Symbol;Acc:MGI:1914421]	Dram2	1.73289	0	2.1639	0	-0.353631	0.0001	-0.451179	0
thioredoxin domain containing 5 [Source:MGI Symbol;Acc:MGI:2145316]	Txndc5	-0.983792	0	-1.71336	0	-0.353703	1	-0.451139	0.0065
transient receptor potential cation channel, subfamily C, member 4 associated protein [Source:MGI Symbol;Acc:MGI:1930751]	Trpc4ap	0.866544	0	0.834315	0	-0.407381	0.7983	-0.451125	0.9972
defective in sister chromatid cohesion 1 homolog (S. cerevisiae) [Source:MGI Symbol;Acc:MGI:1919357]	Dscc1	-0.691641	0	-2.55621	0	0.0181071	1	-0.450901	0.001
hook homolog 1 (Drosophila) [Source:MGI Symbol;Acc:MGI:1925213]	Hook1	-0.412518	0.0001	-1.20546	0	-0.517813	0	-0.450601	0.0009
prostate tumor over expressed gene 1 [Source:MGI Symbol;Acc:MGI:1933946]	Ptov1	0.2409	1	0.308256	0.2699	-0.102372	1	-0.45027	0.0022
transmembrane emp24-like trafficking protein 10 (yeast) [Source:MGI Symbol;Acc:MGI:1915831]	Tmed10	-0.236344	1	-0.454103	0	-0.476261	0.0144	-0.450041	0.0037
family with sequence similarity 103, member A1 [Source:MGI Symbol;Acc:MGI:1914398]	Fam103a1	0.602495	0	-0.116356	1	-0.165119	1	-0.449976	0
olfactory receptor 691 [Source:MGI Symbol;Acc:MGI:3030525]	Olfr691	-0.362738	0.6882	-0.255295	0.9998	-0.502129	0	-0.449968	0.106
polymerase (DNA-directed), epsilon 4 (p12 subunit) [Source:MGI Symbol;Acc:MGI:1914229]	Pole4	-0.545845	0	-1.46269	0	-0.542009	0	-0.449838	0.0024
RNA binding motif protein 14 [Source:MGI Symbol;Acc:MGI:1929092]	Rbm14	0.207518	0.9998	-0.0296411	1	-0.296212	0.1965	-0.449751	0.0009
SERTA domain containing 2 [Source:MGI Symbol;Acc:MGI:1931026]	Sertad2	0.485313	0.0103	0.607285	0	-0.467049	0.9963	-0.449612	0.9673
cyclin-dependent kinase inhibitor 3 [Source:MGI Symbol;Acc:MGI:1919641]	Cdkn3	-0.215251	1	-1.97451	0	-0.15841	1	-0.449483	0.0008
La ribonucleoprotein domain family, member 4B [Source:MGI Symbol;Acc:MGI:106330]	Larp4b	0.10908	1	0.41109	0.0913	-0.436375	0.0004	-0.449349	0.001
transmembrane protein 59 [Source:MGI Symbol;Acc:MGI:1929278]	Tmem59	1.00931	0	1.74758	0	-0.184125	1	-0.449204	0
zinc finger protein 422 [Source:MGI Symbol;Acc:MGI:1914505]	Zfp422	0.312375	0.0103	0.261531	0.7773	-0.195205	0.9607	-0.449078	0.0008
transmembrane protein 175 [Source:MGI Symbol;Acc:MGI:1919642]	Tmem175	0.309816	0.0173	0.277759	0.9857	-0.290284	0.2525	-0.448993	0.0053
peroxiredoxin 2, related sequence 3 [Source:MGI Symbol;Acc:MGI:1859808]	Prdx2-rs3	0.109481	1	0.376179	0.3595	-0.251779	1	-0.448739	0.006
ubiquitination factor E4B, UFD2 homolog (S. cerevisiae) [Source:MGI Symbol;Acc:MGI:1927086]	Ube4b	0.267344	0.9047	-0.0543833	1	-0.352457	0.0032	-0.448662	0
lysine (K)-specific demethylase 3A [Source:MGI Symbol;Acc:MGI:98847]	Kdm3a	0.421985	0	0.762485	0	-0.0204356	1	-0.448639	0
expressed sequence AW554918 [Source:MGI Symbol;Acc:MGI:2147376]	AW554918	-0.68876	0	-2.01118	0	-0.457377	0.0568	-0.448394	0.005
ArfGAP with FG repeats 1 [Source:MGI Symbol;Acc:MGI:1333754]	Agfg1	-0.0594919	1	-0.913026	0	-0.574244	0	-0.448162	0.0014
S100 calcium binding protein A14 [Source:MGI Symbol;Acc:MGI:1913416]	S100a14	-0.821483	0	-2.15576	0	-0.353279	0.001	-0.44804	0.0015
asparagine-linked glycosylation 13 [Source:MGI Symbol;Acc:MGI:1914824]	Alg13	-0.262074	1	-1.31248	0	-0.595967	0	-0.447828	0.0262
mannoside acetylglucosaminyltransferase 4, isoenzyme B [Source:MGI Symbol;Acc:MGI:2143974]	Mgat4b	-0.0189467	1	0.1318	1	-0.458186	0	-0.447763	0.002
PIH1 domain containing 2 [Source:MGI Symbol;Acc:MGI:1919864]	Pih1d2	-0.154045	1	-0.10909	1	-0.40682	0.1601	-0.447621	0.9991
keratin 7 [Source:MGI Symbol;Acc:MGI:96704]	Krt7	-0.980076	0	-0.0840493	1	-0.554845	0	-0.447448	0.001
TSPY-like 4 [Source:MGI Symbol;Acc:MGI:106393]	Tspyl4	-0.647282	0.0026	-0.796626	0.0005	-0.249618	1	-0.447444	0.043
v-erb-b2 erythroblastic leukemia viral oncogene homolog 2, neuro/glioblastoma derived oncogene homolog (avian) [Source:MGI Symbol;Acc:MGI:95410]	Erbb2	0.626252	0.0009	0.589802	0	-0.179454	1	-0.447216	0
NAD(P) dependent steroid dehydrogenase-like [Source:MGI Symbol;Acc:MGI:1099438]	Nsdhl	-0.803904	0	-1.84177	0	-0.521571	0	-0.447066	0.0756
transforming, acidic coiled-coil containing protein 1 [Source:MGI Symbol;Acc:MGI:2443510]	Tacc1	1.37566	0	1.30101	0	-0.249726	1	-0.447015	0.0022
S-adenosylhomocysteine hydrolase [Source:MGI Symbol;Acc:MGI:87968]	Ahcy	-0.137835	1	-2.02152	0	-0.352341	0	-0.446993	0
PRP38 pre-mRNA processing factor 38 (yeast) domain containing A [Source:MGI Symbol;Acc:MGI:1916962]	Prpf38a	-0.0445518	1	-0.113097	1	-0.51371	0	-0.446938	0
akirin 1 [Source:MGI Symbol;Acc:MGI:1915300]	Akirin1	0.0451773	1	0.200567	1	-0.685396	0	-0.446726	0.0347
lysophosphatidylcholine acyltransferase 3 [Source:MGI Symbol;Acc:MGI:1315211]	Lpcat3	-0.326181	0.9988	0.0922751	1	-0.172505	1	-0.446697	0.0024
ARP1 actin-related protein 1B, centractin beta [Source:MGI Symbol;Acc:MGI:1917446]	Actr1b	0.182324	1	0.0530279	1	-0.351109	0.977	-0.446649	0.0401
1-aminocyclopropane-1-carboxylate synthase (non-functional) [Source:MGI Symbol;Acc:MGI:1919717]	Accs	0.879494	0	0.3792	0.0149	-0.225686	1	-0.446437	0.0016
metallo-beta-lactamase domain containing 2 [Source:MGI Symbol;Acc:MGI:1920102]	Mblac2	-0.404577	0.0003	-0.516481	0	-0.32164	0.3336	-0.446142	0.0011
glutathione S-transferase, alpha 3 [Source:MGI Symbol;Acc:MGI:95856]	Gsta3	-0.272085	0.6342	-2.98438	0	-0.440493	0.0023	-0.445895	0.0091
RIKEN cDNA 5730419I09 gene [Source:MGI Symbol;Acc:MGI:1921991]	5730419I09Rik	-0.0154952	1	-0.537791	0	-0.465606	0	-0.445759	0
synaptophysin-like protein [Source:MGI Symbol;Acc:MGI:108081]	Sypl	-0.29827	0.0196	-0.583625	0	-0.204436	1	-0.445716	0
non imprinted in Prader-Willi/Angelman syndrome 2 homolog (human) [Source:MGI Symbol;Acc:MGI:1913918]	Nipa2	0.0324112	1	0.1554	1	-0.45198	0	-0.445637	0
RIKEN cDNA E330017A01 gene [Source:MGI Symbol;Acc:MGI:3045360]	E330017A01Rik	-0.159855	1	0.00481057	1	-0.283392	0.1269	-0.44527	0
serine/arginine-rich splicing factor 2 [Source:MGI Symbol;Acc:MGI:98284]	Srsf2	-1.0136	0	-1.37157	0	-0.107583	1	-0.445264	0
sperm associated antigen 16 [Source:MGI Symbol;Acc:MGI:1913972]	Spag16	0.274852	0.9857	0.93101	0	-0.264636	0.9426	-0.444953	0.0002
transformed mouse 3T3 cell double minute 4 [Source:MGI Symbol;Acc:MGI:107934]	Mdm4	0.532556	0.0001	0.43096	0.0001	-0.584029	0	-0.444857	0
PITH (C-terminal proteasome-interacting domain of thioredoxin-like) domain containing 1 [Source:MGI Symbol;Acc:MGI:1913443]	Pithd1	-0.584908	0	-1.3628	0	-0.360986	0.2019	-0.444818	0
LIM domain containing 2 [Source:MGI Symbol;Acc:MGI:1915053]	Limd2	0.479841	0.0001	0.569783	0	-0.317585	1	-0.444523	0.2935
cytoskeleton associated protein 2 [Source:MGI Symbol;Acc:MGI:1931797]	Ckap2	0.0223749	1	-2.46108	0	-0.549795	0	-0.444325	0.0523
receptor accessory protein 6 [Source:MGI Symbol;Acc:MGI:1917585]	Reep6	-0.247799	0.9695	-0.157538	1	-0.389158	0.0024	-0.443895	0
nuclear receptor subfamily 2, group F, member 2 [Source:MGI Symbol;Acc:MGI:1352452]	Nr2f2	-0.72764	0	-0.872095	0	-0.272294	1	-0.443835	0.0006
	AC110377.1	0.328756	0.5037	0.310212	0.9449	-0.161484	1	-0.443787	0.0135
AF4/FMR2 family, member 1 [Source:MGI Symbol;Acc:MGI:1100819]	Aff1	0.283851	1	0.697729	0	-0.680421	0	-0.443705	0.0003
synuclein, beta [Source:MGI Symbol;Acc:MGI:1889011]	Sncb	0.0505087	1	0.028555	1	0.0813396	1	-0.443662	1
protein-L-isoaspartate (D-aspartate) O-methyltransferase domain containing 2 [Source:MGI Symbol;Acc:MGI:1923927]	Pcmtd2	1.92335	0	1.9978	0	-0.183302	1	-0.44354	0.0005
cell division cycle 123 [Source:MGI Symbol;Acc:MGI:2138811]	Cdc123	-0.0935003	1	-0.515058	0	-0.173313	1	-0.443114	0
zinc finger protein 207 [Source:MGI Symbol;Acc:MGI:1340045]	Zfp207	-0.198197	1	0.364046	0.0778	0.0900675	1	-0.443075	0
RIKEN cDNA 2010003O02 gene [Source:MGI Symbol;Acc:MGI:1913684]	2010003O02Rik	0.111325	1	-0.387866	0.0055	-0.121108	1	-0.442993	0
predicted gene 20632 [Source:MGI Symbol;Acc:MGI:5313079]	Gm20632	0.602552	0.0026	0.727563	0	-0.0796625	1	-0.442912	1
ubiquitin-conjugating enzyme E2G 1 [Source:MGI Symbol;Acc:MGI:1914378]	Ube2g1	-0.379233	0.0076	-0.307114	0.0509	-0.326324	0.0029	-0.442809	0.0001
HD domain containing 2 [Source:MGI Symbol;Acc:MGI:1916942]	Hddc2	-0.801511	1	-1.2323	0	-0.53072	0	-0.442669	0.0002
glucocorticoid modulatory element binding protein 1 [Source:MGI Symbol;Acc:MGI:2135604]	Gmeb1	-0.00601848	1	0.200479	1	-0.148897	1	-0.442475	0.0018
leucine rich repeat containing 47 [Source:MGI Symbol;Acc:MGI:1920196]	Lrrc47	-0.267745	1	-0.239886	0.4673	-0.256749	0.9998	-0.44232	0.0114
A kinase (PRKA) anchor protein 1 [Source:MGI Symbol;Acc:MGI:104729]	Akap1	-1.29977	0	-1.57726	0	-0.323846	0.6366	-0.442256	0.0002
RAB3A interacting protein [Source:MGI Symbol;Acc:MGI:105933]	Rab3ip	0.230683	0.8762	-0.0423543	1	-0.512835	0	-0.442234	0.0002
ATPase, class I, type 8B, member 2 [Source:MGI Symbol;Acc:MGI:1859660]	Atp8b2	-0.544477	0	-0.522685	0	-0.360722	0.0015	-0.442218	0.0002
ring finger protein 170 [Source:MGI Symbol;Acc:MGI:1924983]	Rnf170	-0.283576	0.7427	-0.424273	0.004	-0.418884	0.6025	-0.441915	0.0002
feminization 1 homolog a (C. elegans) [Source:MGI Symbol;Acc:MGI:1335089]	Fem1a	-0.802273	0	-0.400425	0.0027	-0.0605026	1	-0.441615	0.0037
NAD(P) dependent steroid dehydrogenase-like [Source:MGI Symbol;Acc:MGI:1099438]	Nsdhl	-0.670396	0	-1.70087	0	-0.460493	0.0018	-0.441589	0.0002
zinc finger, DHHC domain containing 13 [Source:MGI Symbol;Acc:MGI:1919227]	Zdhhc13	-0.680969	0	-0.648516	0	-0.393556	0	-0.441366	0.0001
phospholipase C, gamma 1 [Source:MGI Symbol;Acc:MGI:97615]	Plcg1	-0.194744	1	-0.237216	1	-0.238311	0.9986	-0.440888	0.0005
CWF19-like 2, cell cycle control (S. pombe) [Source:MGI Symbol;Acc:MGI:1918023]	Cwf19l2	-0.0602062	1	-0.345235	0.2425	-0.679712	0	-0.440837	0.0185
adiponectin receptor 2 [Source:MGI Symbol;Acc:MGI:93830]	Adipor2	0.159074	1	1.02015	0	-0.323503	0.0005	-0.440761	0
3-hydroxy-3-methylglutaryl-Coenzyme A reductase [Source:MGI Symbol;Acc:MGI:96159]	Hmgcr	-0.808624	0	-1.89256	0	-0.271287	0.0216	-0.44062	0.0019
glutathione S-transferase, alpha 3 [Source:MGI Symbol;Acc:MGI:95856]	Gsta3	-0.278769	0.369	-2.99526	0	-0.322274	0.1122	-0.440608	0
transmembrane protein 54 [Source:MGI Symbol;Acc:MGI:1913510]	Tmem54	-0.890789	0	-1.36226	0	-0.0667945	1	-0.440606	0.0039
interleukin 18 receptor 1 [Source:MGI Symbol;Acc:MGI:105383]	Il18r1	1.31085	0	2.80812	0	-0.34397	0.0576	-0.440338	0.1332
cleavage stimulation factor, 3' pre-RNA, subunit 3 [Source:MGI Symbol;Acc:MGI:1351825]	Cstf3	0.306601	0.9994	0.81723	0	-0.112135	1	-0.440265	0.0003
ArfGAP with GTPase domain, ankyrin repeat and PH domain 3 [Source:MGI Symbol;Acc:MGI:2183446]	Agap3	0.151781	1	0.0841187	1	-0.378117	0	-0.440224	0.0004
wingless-related MMTV integration site 7B [Source:MGI Symbol;Acc:MGI:98962]	Wnt7b	-0.190026	1	0.353809	0.5515	-0.181374	1	-0.439958	0.0078
	AC139673.1	-0.15388	1	-0.597249	0	-0.229792	0.9978	-0.439749	0.0006
opsin 1 (cone pigments), short-wave-sensitive (color blindness, tritan) [Source:MGI Symbol;Acc:MGI:99438]	Opn1sw	0.0114241	1	0.384006	1	-0.00024095	1	-0.439412	1
glutathione reductase [Source:MGI Symbol;Acc:MGI:95804]	Gsr	-0.712729	0	-1.22657	0	-0.0879358	1	-0.439287	0
general transcription factor II I [Source:MGI Symbol;Acc:MGI:1202722]	Gtf2i	-1.24377	0	-1.32759	0	-0.29722	0.0082	-0.43915	0
ribosomal protein S19 binding protein 1 [Source:MGI Symbol;Acc:MGI:1913788]	Rps19bp1	-0.479874	0.0001	-0.530785	0.0016	-0.330817	0.0024	-0.439066	0
annexin A6 [Source:MGI Symbol;Acc:MGI:88255]	Anxa6	-0.30912	1	-0.394794	0.0822	-0.0920803	1	-0.439044	0.7289
nucleolin [Source:MGI Symbol;Acc:MGI:97286]	Ncl	-0.927677	0	-1.81974	0	-0.297536	0.0125	-0.438966	0.0259
heat shock protein 90, beta (Grp94), member 1 [Source:MGI Symbol;Acc:MGI:98817]	Hsp90b1	-0.77596	0	-1.55711	0	-0.52671	0	-0.438941	0.0457
melanoma inhibitory activity protein 3 precursor [Source:RefSeq peptide;Acc:NP_796363]	MIA3	-0.0786947	1	-0.00523782	1	-0.408878	0	-0.438827	0
ARP1 actin-related protein 1B, centractin beta [Source:MGI Symbol;Acc:MGI:1917446]	Actr1b	0.212495	1	0.310759	0.1245	-0.35961	0.7952	-0.438614	0
	AC159129.1	-0.0169382	1	-0.131541	1	-0.607177	0	-0.438601	0
predicted gene 6644 [Source:MGI Symbol;Acc:MGI:3644951]	Gm6644	-0.539222	0	-1.93923	0	-0.834676	0	-0.438292	0.0014
EH-domain containing 2 [Source:MGI Symbol;Acc:MGI:2154274]	Ehd2	-0.740613	0	-0.71292	0	-0.0747267	1	-0.43778	0.0557
COX19 cytochrome c oxidase assembly homolog (S. cerevisiae) [Source:MGI Symbol;Acc:MGI:1915283]	Cox19	0.0120966	1	0.123957	1	-0.0722962	1	-0.436918	0.0002
kinesin family member C3 [Source:MGI Symbol;Acc:MGI:109202]	Kifc3	-0.437664	0.0001	0.278687	0.1685	-0.138145	1	-0.436783	0.061
predicted pseudogene 5135 [Source:MGI Symbol;Acc:MGI:3646830]	Gm5135	-0.0196997	1	-0.0988222	1	-0.557395	0	-0.436748	0.0002
complement component 3 [Source:MGI Symbol;Acc:MGI:88227]	C3	0.0793884	1	0.230523	0.8529	0.219079	1	-0.436666	0.0012
zinc finger CCCH-type, antiviral 1-like [Source:MGI Symbol;Acc:MGI:2443387]	Zc3hav1l	-0.731942	0	-0.920759	0	-0.611264	0	-0.436594	0.2442
transmembrane protein 59 [Source:MGI Symbol;Acc:MGI:1929278]	Tmem59	1.05604	0	1.80314	0	-0.184028	1	-0.436442	0
synaptophysin-like protein [Source:MGI Symbol;Acc:MGI:108081]	Sypl	-0.313386	0.0447	-0.670029	0	-0.174973	1	-0.436412	0
down-regulator of transcription 1 [Source:MGI Symbol;Acc:MGI:1100515]	Dr1	0.134195	1	0.199889	1	-0.489779	0	-0.436311	0.0003
Yip1 domain family, member 5 [Source:MGI Symbol;Acc:MGI:1914430]	Yipf5	0.167666	1	0.399948	0.0011	-0.354254	0.0006	-0.436198	0.0004
general transcription factor II I repeat domain-containing 1 [Source:MGI Symbol;Acc:MGI:1861942]	Gtf2ird1	-0.921497	0	-0.72387	0	-0.533499	0	-0.436098	0.0003
uracil DNA glycosylase [Source:MGI Symbol;Acc:MGI:109352]	Ung	-2.93439	0	-2.88206	0	0.0887115	1	-0.435833	0.0006
sortilin 1 [Source:MGI Symbol;Acc:MGI:1338015]	Sort1	-0.487593	0	-0.0850253	1	-0.451175	1	-0.435698	0.0422
U2AF homology motif (UHM) kinase 1 [Source:MGI Symbol;Acc:MGI:1341908]	Uhmk1	0.617167	0	1.10195	0	-0.363614	0.0001	-0.435604	0.0094
ATP-binding cassette, sub-family F (GCN20), member 2 [Source:MGI Symbol;Acc:MGI:1351657]	Abcf2	-0.377911	0.8394	-0.623081	0.001	-0.408499	0.0932	-0.435423	0.9518
retinol binding protein 7, cellular [Source:MGI Symbol;Acc:MGI:1890409]	Rbp7	-0.260665	0.7049	-0.379247	0.954	0.0360461	1	-0.435183	0.0334
dual specificity phosphatase 11 (RNA/RNP complex 1-interacting) [Source:MGI Symbol;Acc:MGI:1919352]	Dusp11	-0.0354402	1	0.188211	1	-0.374647	0.0001	-0.435119	0.0161
leucine-rich PPR-motif containing [Source:MGI Symbol;Acc:MGI:1919666]	Lrpprc	-0.323384	0.9457	-0.980335	0	-0.204704	1	-0.43492	0.122
phosphoinositide-3-kinase interacting protein 1 [Source:MGI Symbol;Acc:MGI:1917016]	Pik3ip1	2.33969	0	3.21095	0	-0.00481364	1	-0.434764	1
sprouty homolog 2 (Drosophila) [Source:MGI Symbol;Acc:MGI:1345138]	Spry2	0.472332	0.0002	0.468604	0.0261	-0.285115	1	-0.434656	0.2152
predicted gene 8865 [Source:MGI Symbol;Acc:MGI:3647567]	Gm8865	0.02273	1	-0.00452851	1	-0.0971068	1	-0.434592	0
actin related protein 2/3 complex, subunit 3 [Source:MGI Symbol;Acc:MGI:1928375]	Arpc3	0.402558	0.0003	0.898448	0	-0.351051	0.0005	-0.434518	0.0002
ubiquitin C [Source:MGI Symbol;Acc:MGI:98889]	Ubc	0.596162	0	1.25461	0	-0.247322	0.2149	-0.434177	0.2623
delta/notch-like EGF-related receptor [Source:MGI Symbol;Acc:MGI:2152889]	Dner	-0.139819	1	-0.187965	1	-0.161285	1	-0.433886	1
SLX1 structure-specific endonuclease subunit homolog B (S. cerevisiae) [Source:MGI Symbol;Acc:MGI:1915220]	Slx1b	0.223521	1	0.539978	0	0.0281589	1	-0.433504	0.2986
RIKEN cDNA 4833413E03 gene [Source:MGI Symbol;Acc:MGI:1925354]	4833413E03Rik	-0.666121	0	-1.09987	0	-0.497089	0	-0.433458	0.3058
proteasome (prosome, macropain) 26S subunit, non-ATPase, 12 [Source:MGI Symbol;Acc:MGI:1914247]	Psmd12	-0.470671	0.0001	-0.483051	0.0012	-0.470785	0	-0.433415	0.0014
hook homolog 3 (Drosophila) [Source:MGI Symbol;Acc:MGI:2443554]	Hook3	0.487363	0.0001	0.610076	0	-0.242985	1	-0.433399	0.0016
sterile alpha motif domain containing 4 [Source:MGI Symbol;Acc:MGI:1921730]	Samd4	0.124156	1	0.554677	0	-0.689069	0	-0.433399	0.0307
serine/arginine-rich protein specific kinase 3 [Source:MGI Symbol;Acc:MGI:1891338]	Srpk3	-0.559326	0	-0.597786	0	-0.279469	0.0386	-0.433235	0
WD repeat and FYVE domain containing 3 [Source:MGI Symbol;Acc:MGI:1096875]	Wdfy3	0.382468	0.115	0.353888	0.0334	-0.267192	0.2027	-0.4332	0.0014
transcription factor Dp 2 [Source:MGI Symbol;Acc:MGI:107167]	Tfdp2	0.125678	1	-0.55685	0	-0.262729	0.4854	-0.432959	0
histone cluster 1, H1c [Source:MGI Symbol;Acc:MGI:1931526]	Hist1h1c	-0.0512512	1	3.17579	0	-0.404949	0.0139	-0.432692	1
chemokine (C-X-C motif) receptor 7 [Source:MGI Symbol;Acc:MGI:109562]	Cxcr7	0.0168671	1	-0.12157	1	-0.0618181	1	-0.432272	0.7114
tubulin-specific chaperone C [Source:MGI Symbol;Acc:MGI:1919976]	Tbcc	-0.301952	0.1831	-0.0574187	1	-0.088698	1	-0.432252	0.0002
TAO kinase 3 [Source:MGI Symbol;Acc:MGI:3041177]	Taok3	0.177522	1	0.983014	0	-0.186055	1	-0.432213	0
	AC175315.1	-0.704322	0	-0.704524	0	-0.411641	0.1054	-0.432069	0.3118
nuclear transport factor 2-like export factor 2 [Source:MGI Symbol;Acc:MGI:2147914]	Nxt2	0.977104	0	0.781645	0	-0.305237	0.2571	-0.431974	0.0419
syntaxin 3 [Source:MGI Symbol;Acc:MGI:103077]	Stx3	0.0345256	1	-0.245458	1	-0.388673	0	-0.431888	0
TBC1 domain family, member 22a [Source:MGI Symbol;Acc:MGI:1289265]	Tbc1d22a	0.726605	0	1.31995	0	-0.330503	0.9942	-0.431277	0.0001
myeloblastosis oncogene-like 1 [Source:MGI Symbol;Acc:MGI:99925]	Mybl1	-0.747664	0	-1.07383	0	-0.0823742	1	-0.431098	0.6221
vesicle-associated membrane protein, associated protein B and C [Source:MGI Symbol;Acc:MGI:1928744]	Vapb	-0.136932	1	-0.844134	0	-0.293617	1	-0.43104	1
R3H domain containing 4 [Source:MGI Symbol;Acc:MGI:1924814]	R3hdm4	0.824141	0	1.29466	0	0.00705194	1	-0.430828	0.0046
isopentenyl-diphosphate delta isomerase [Source:MGI Symbol;Acc:MGI:2442264]	Idi1	-0.991731	0	-3.48102	0	-0.722363	0	-0.430814	0
transmembrane and ubiquitin-like domain containing 2 [Source:MGI Symbol;Acc:MGI:1919303]	Tmub2	0.0264177	1	0.201032	1	-0.247758	0.1245	-0.43081	0
mitochondrially encoded cytochrome b [Source:MGI Symbol;Acc:MGI:102501]	mt-Cytb	0.227507	1	0.833756	0.9459	-0.0800833	1	-0.430795	1
envoplakin [Source:MGI Symbol;Acc:MGI:107507]	Evpl	-0.0789705	1	-0.0909566	1	-0.243139	0.9988	-0.430684	0.0001
ubiquitin C [Source:MGI Symbol;Acc:MGI:98889]	Ubc	0.633775	0	1.19268	0	-0.1126	1	-0.430643	0.2319
microtubule-associated protein, RP/EB family, member 2 [Source:MGI Symbol;Acc:MGI:106271]	Mapre2	-0.492986	0.0071	-1.27988	0	-0.412623	0.1138	-0.430542	0.1301
ISY1 splicing factor homolog (S. cerevisiae) [Source:MGI Symbol;Acc:MGI:1923310]	Isy1	-0.315016	0.0781	-1.03275	0	-0.578827	0	-0.430478	0.0002
COX19 cytochrome c oxidase assembly homolog (S. cerevisiae) [Source:MGI Symbol;Acc:MGI:1915283]	Cox19	0.0621632	1	0.146512	1	-0.1201	1	-0.430367	0
prominin 2 [Source:MGI Symbol;Acc:MGI:2138997]	Prom2	-1.5531	0	-2.23084	0	-0.166908	1	-0.430132	0.0296
beta-site APP cleaving enzyme 1 [Source:MGI Symbol;Acc:MGI:1346542]	Bace1	-0.38827	0.2184	-1.06547	0	0.0163109	1	-0.429632	0.1811
predicted pseudogene 6685 [Source:MGI Symbol;Acc:MGI:3704119]	Gm6685	0.16791	1	0.465494	0	-0.396724	0.0004	-0.429514	0.0003
interleukin 10 receptor, beta [Source:MGI Symbol;Acc:MGI:109380]	Il10rb	0.439655	0.0012	0.496421	0	-0.230807	1	-0.429483	0.0012
cullin-associated and neddylation-dissociated 2 (putative) [Source:MGI Symbol;Acc:MGI:1914338]	Cand2	-0.297091	0.7475	-0.858915	0	-0.229181	1	-0.429279	1
phosphatidylinositol-5-phosphate 4-kinase, type II, alpha [Source:MGI Symbol;Acc:MGI:1298206]	Pip4k2a	-0.137667	1	-0.29468	0.2926	-0.457972	0	-0.429251	0.0003
ribosome production factor 1 homolog (S. cerevisiae) [Source:MGI Symbol;Acc:MGI:1917535]	Rpf1	0.521332	0	0.376157	0.0016	0.0254824	1	-0.429191	1
chromodomain helicase DNA binding protein 4 [Source:MGI Symbol;Acc:MGI:1344380]	Chd4	-0.376414	0.7356	0.00662118	1	-0.0895344	1	-0.428465	0.6385
glycerophosphodiester phosphodiesterase domain containing 5 [Source:MGI Symbol;Acc:MGI:2686926]	Gdpd5	-0.75172	0.0001	-0.292544	0.2329	-0.0371046	1	-0.428422	0.9644
vacuolar protein sorting 4a (yeast) [Source:MGI Symbol;Acc:MGI:1890520]	Vps4a	0.563148	0	0.531339	0.0019	-0.249742	1	-0.428346	0.0333
UDP-glucose pyrophosphorylase 2 [Source:MGI Symbol;Acc:MGI:2183447]	Ugp2	-0.191552	1	-0.507287	0	-0.358915	0.3681	-0.4283	0.055
neurocalcin delta [Source:MGI Symbol;Acc:MGI:1196326]	Ncald	0.17788	1	0.070513	1	-0.213548	1	-0.428203	0.0002
kelch domain containing 10 [Source:MGI Symbol;Acc:MGI:1924038]	Klhdc10	0.172961	1	0.195688	1	-0.571315	0	-0.428181	0.0014
ADP-ribosylation factor-like 5B [Source:MGI Symbol;Acc:MGI:1923119]	Arl5b	0.353831	0.4545	0.480017	0	-0.371458	0.0001	-0.428081	0.0002
N-myc downstream regulated gene 3 [Source:MGI Symbol;Acc:MGI:1352499]	Ndrg3	-0.362436	0.2604	-1.42644	0	-0.385269	0	-0.428022	0.0014
SOX2 overlapping transcript (non-protein coding) [Source:MGI Symbol;Acc:MGI:2444112]	Sox2ot	-0.0264769	1	-0.0237522	1	-0.223202	1	-0.427964	0.017
fumarylacetoacetate hydrolase [Source:MGI Symbol;Acc:MGI:95482]	Fah	0.216026	1	0.0142124	1	-0.137795	1	-0.427956	0.2436
cleft lip and palate associated transmembrane protein 1 [Source:MGI Symbol;Acc:MGI:1927155]	Clptm1	0.0735872	1	0.326698	0.1155	-0.116537	1	-0.427803	0.3134
cofilin 1, non-muscle [Source:MGI Symbol;Acc:MGI:101757]	Cfl1	-0.128475	1	-0.64252	0	-0.215885	1	-0.427533	0.9169
family with sequence similarity 120B [Source:MGI Symbol;Acc:MGI:1914794]	Fam120b	-0.126899	1	-0.32749	1	-0.256501	0.927	-0.427477	0.0911
rhomboid domain containing 2 [Source:MGI Symbol;Acc:MGI:1915612]	Rhbdd2	-0.689851	0	-0.505103	0	0.083084	1	-0.427318	0.0012
RAB31, member RAS oncogene family [Source:MGI Symbol;Acc:MGI:1914603]	Rab31	1.00639	0	1.25377	0	-0.210887	1	-0.427252	0.0001
fatty acid desaturase 2 [Source:MGI Symbol;Acc:MGI:1930079]	Fads2	-0.444794	0.0003	-0.771515	0	-0.26213	0.1075	-0.426306	0.0068
exocyst complex component 6 [Source:MGI Symbol;Acc:MGI:1351611]	Exoc6	1.31524	0	0.814961	0	-0.526724	0	-0.426133	0.0006
signal recognition particle receptor, B subunit [Source:MGI Symbol;Acc:MGI:102964]	Srprb	-0.321405	0.3264	-0.339329	0.0112	-0.456512	0	-0.426071	0.0036
predicted gene 14504 [Source:MGI Symbol;Acc:MGI:3705735]	Gm14504	-0.297107	0.9843	-1.33492	0	-0.0600182	1	-0.426003	0.3249
YKT6 homolog (S. Cerevisiae) [Source:MGI Symbol;Acc:MGI:1927550]	Ykt6	0.22362	1	1.00872	0	-0.470417	0.0065	-0.425982	0.007
tumor suppressor candidate 3 [Source:MGI Symbol;Acc:MGI:1933134]	Tusc3	-0.0946537	1	-0.440019	0	-0.249087	0.9361	-0.425916	0
solute carrier family 35, member E1 [Source:MGI Symbol;Acc:MGI:2142403]	Slc35e1	-0.164886	1	-0.413496	0.0005	-0.20933	1	-0.425658	0.0169
eukaryotic translation initiation factor 2, subunit 2 (beta) [Source:MGI Symbol;Acc:MGI:1914454]	Eif2s2	-0.592221	0	-1.38943	0	-0.613977	0	-0.425534	0.0003
predicted gene 12715 [Source:MGI Symbol;Acc:MGI:3650759]	Gm12715	-0.345053	1	-0.679118	0	-0.117681	1	-0.425524	0.4782
solute carrier family 30 (zinc transporter), member 9 [Source:MGI Symbol;Acc:MGI:1923690]	Slc30a9	0.535545	0	0.428078	0.9724	-0.474174	0.9303	-0.425441	0.359
solute carrier family 4, sodium bicarbonate transporter-like, member 11 [Source:MGI Symbol;Acc:MGI:2138987]	Slc4a11	-0.723701	0	-1.08565	0	-0.187988	1	-0.425426	0.9621
plexin A3 [Source:MGI Symbol;Acc:MGI:107683]	Plxna3	-0.167987	1	0.201496	1	-0.26493	0.999	-0.425331	0.634
heterogeneous nuclear ribonucleoprotein A3 [Source:MGI Symbol;Acc:MGI:1917171]	Hnrnpa3	-0.335443	0.0343	-1.22142	0	-0.331226	0.1236	-0.425075	0.0006
transcription elongation factor B (SIII), polypeptide 3 [Source:MGI Symbol;Acc:MGI:1351315]	Tceb3	0.203126	1	0.653399	0	-0.479738	0	-0.424912	0.0016
uridine-cytidine kinase 2 [Source:MGI Symbol;Acc:MGI:1931744]	Uck2	-1.00571	0	-1.1729	0	-0.522553	0	-0.424585	0.0002
X-linked lymphocyte-regulated 5A [Source:MGI Symbol;Acc:MGI:3574108]	Xlr5a	0.0930733	1	-0.00856178	1	-0.0336508	1	-0.424399	1
transmembrane protein 150A [Source:MGI Symbol;Acc:MGI:2385244]	Tmem150a	-0.549109	0.3722	-0.378929	0.0599	-0.378132	0.0005	-0.42426	0.8537
K+ voltage-gated channel, subfamily S, 1 [Source:MGI Symbol;Acc:MGI:1197019]	Kcns1	-0.0958558	1	-0.231081	1	-0.392379	0.0001	-0.42425	0
F-box and leucine-rich repeat protein 20 [Source:MGI Symbol;Acc:MGI:1919444]	Fbxl20	1.41208	0	2.02763	0	0.0503276	1	-0.423824	0.0003
CDP-diacylglycerol synthase 1 [Source:MGI Symbol;Acc:MGI:1921846]	Cds1	-1.10104	0	-1.64703	0	-0.669618	0	-0.423559	0.0002
tetratricopeptide repeat domain 30B [Source:MGI Symbol;Acc:MGI:1919671]	Ttc30b	1.11271	0	1.32581	0	-0.0561612	1	-0.423319	0.0012
YME1-like 1 (S. cerevisiae) [Source:MGI Symbol;Acc:MGI:1351651]	Yme1l1	0.175378	1	0.278306	0.0446	-0.637049	0	-0.423273	0.0009
tubulin, alpha 1A [Source:MGI Symbol;Acc:MGI:98869]	Tuba1a	-0.828668	0	-1.36466	0	-0.437436	0.0013	-0.423155	0.1544
DnaJ (Hsp40) homolog, subfamily B, member 4 [Source:MGI Symbol;Acc:MGI:1914285]	Dnajb4	-0.263742	0.8686	-0.284286	0.1404	-0.261139	1	-0.422754	1
acidic (leucine-rich) nuclear phosphoprotein 32 family, member A [Source:MGI Symbol;Acc:MGI:108447]	Anp32a	-0.591745	0.0001	-1.24578	0	-0.148845	1	-0.422346	0.7193
SUMO/sentrin specific peptidase 8 [Source:MGI Symbol;Acc:MGI:1918849]	Senp8	0.452363	0.1171	0.237992	1	-0.301865	0.333	-0.422248	0.742
nuclear factor of activated T cells 5 [Source:MGI Symbol;Acc:MGI:1859333]	Nfat5	-0.117161	1	0.109414	1	-0.0116098	1	-0.422176	0
ATPase, Ca++ transporting, type 2C, member 2 [Source:MGI Symbol;Acc:MGI:1916297]	Atp2c2	-0.461583	0.0022	-0.91562	0	-0.228049	0.9891	-0.422132	0.0079
ADP-ribosylation factor-like 15 [Source:MGI Symbol;Acc:MGI:2442308]	Arl15	-0.75587	0	-1.05419	0	-0.397629	0.0041	-0.421906	0.028
polymerase (RNA) III (DNA directed) polypeptide E [Source:MGI Symbol;Acc:MGI:1349452]	Polr3e	-0.76873	0	-0.667197	0	-0.474372	0	-0.421794	0
coiled-coil domain containing 96 [Source:MGI Symbol;Acc:MGI:1913967]	Ccdc96	-0.404378	0.0022	-1.08454	0	-0.247662	0.2909	-0.42168	0.0002
ATPase, Na+/K+ transporting, alpha 4 polypeptide [Source:MGI Symbol;Acc:MGI:1351335]	Atp1a4	-0.242801	1	-0.602475	0	-0.122378	1	-0.421282	0
coiled-coil domain containing 88C [Source:MGI Symbol;Acc:MGI:1915589]	Ccdc88c	-0.649059	0	-0.88555	0	-0.107488	1	-0.421059	0.4037
predicted gene 13084 [Source:MGI Symbol;Acc:MGI:3650237]	Gm13084	0.12799	1	0.0659445	1	-0.150702	1	-0.420998	0.216
X-prolyl aminopeptidase (aminopeptidase P) 1, soluble [Source:MGI Symbol;Acc:MGI:2180003]	Xpnpep1	-0.117196	1	0.0635582	1	-0.338539	0.0051	-0.420785	0.8472
RIKEN cDNA 2810408A11 gene [Source:MGI Symbol;Acc:MGI:1917669]	2810408A11Rik	-0.0699152	1	-0.363447	0.0021	-0.285369	0.0496	-0.420297	0.0002
chloride intracellular channel 3 [Source:MGI Symbol;Acc:MGI:1916704]	Clic3	-0.101408	1	-0.0360066	1	-0.0166696	1	-0.420262	0.0002
AXL receptor tyrosine kinase [Source:MGI Symbol;Acc:MGI:1347244]	Axl	0.578697	0	0.857957	0	-0.842666	0	-0.420204	0.0062
RIKEN cDNA 5730528L13 gene [Source:MGI Symbol;Acc:MGI:1913915]	5730528L13Rik	-0.553723	0	-1.06457	0	-0.653121	0	-0.420115	0.0004
trans-2,3-enoyl-CoA reductase [Source:MGI Symbol;Acc:MGI:1915408]	Tecr	0.108611	1	-0.11083	1	-0.146739	1	-0.419974	0.6383
glutathione S-transferase, C-terminal domain containing [Source:MGI Symbol;Acc:MGI:1914803]	Gstcd	-0.844077	0	-1.72196	0	-0.455616	0	-0.419814	0
ATPase, H+ transporting, lysosomal V1 subunit A [Source:MGI Symbol;Acc:MGI:1201780]	Atp6v1a	-0.00427382	1	0.683939	0	-0.397057	1	-0.419596	0.3378
RIKEN cDNA 0610007P08 gene [Source:MGI Symbol;Acc:MGI:1923501]	0610007P08Rik	-0.524664	0.0001	-0.88691	0	-0.278305	0.9436	-0.419494	0.058
bromodomain adjacent to zinc finger domain, 2B [Source:MGI Symbol;Acc:MGI:2442782]	Baz2b	1.54993	0	1.33731	0	-0.294029	0.0197	-0.419405	0.0049
RAB25, member RAS oncogene family [Source:MGI Symbol;Acc:MGI:1858203]	Rab25	0.0881552	1	0.145573	1	-0.20479	1	-0.419362	0.0102
succinate dehydrogenase complex, subunit D, integral membrane protein [Source:MGI Symbol;Acc:MGI:1914175]	Sdhd	0.317744	0.0113	0.187818	1	-0.557102	0	-0.418855	0
tripartite motif-containing 23 [Source:MGI Symbol;Acc:MGI:1933161]	Trim23	0.780369	0	0.46802	0.0086	-0.228109	1	-0.418743	0.0277
tetratricopeptide repeat domain 30B [Source:MGI Symbol;Acc:MGI:1919671]	Ttc30b	1.11592	0	1.34127	0	0.0123684	1	-0.418732	0.0059
nuclear receptor binding protein 2 [Source:MGI Symbol;Acc:MGI:2385017]	Nrbp2	-0.515091	0.0009	-0.980816	0	-0.231031	1	-0.418689	1
solute carrier organic anion transporter family, member 1a6 [Source:MGI Symbol;Acc:MGI:1351906]	Slco1a6	-0.106181	1	0.239862	1	0.250792	1	-0.418543	1
synaptogyrin 1 [Source:MGI Symbol;Acc:MGI:1328323]	Syngr1	0.272465	0.5672	0.63659	0	-0.114671	1	-0.418414	1
golgi to ER traffic protein 4 homolog (S. cerevisiae) [Source:MGI Symbol;Acc:MGI:1914854]	Get4	-0.506836	0	-1.02928	0	-0.354346	0.001	-0.418001	0.0062
mannosyl-oligosaccharide glucosidase [Source:MGI Symbol;Acc:MGI:1929872]	Mogs	-1.16187	0	-1.14995	0	-0.355053	0.0018	-0.417953	0.0199
RIKEN cDNA 2810408A11 gene [Source:MGI Symbol;Acc:MGI:1917669]	2810408A11Rik	-0.170245	1	-0.738963	0	-0.0489628	1	-0.417723	0.15
RAS-related C3 botulinum substrate 1 [Source:MGI Symbol;Acc:MGI:97845]	Rac1	1.21496	0	0.835714	0.004	-0.11544	1	-0.417579	0.9165
mitogen-activated protein kinase associated protein 1 [Source:MGI Symbol;Acc:MGI:2444554]	Mapkap1	0.282131	0.2627	0.510314	0	-0.438125	0	-0.417577	0
zinc finger, DHHC domain containing 13 [Source:MGI Symbol;Acc:MGI:1919227]	Zdhhc13	-0.71748	0	-0.602804	0	-0.457025	0	-0.417253	0.0032
GTF2I repeat domain containing 2 [Source:MGI Symbol;Acc:MGI:2149780]	Gtf2ird2	0.14896	1	0.807413	0	-0.0331975	1	-0.41712	0.0604
RIKEN cDNA 2310061C15 gene [Source:MGI Symbol;Acc:MGI:1913781]	2310061C15Rik	-1.06758	0	-2.24034	0	-0.295195	0.0045	-0.417072	0.0002
F-box protein 2 [Source:MGI Symbol;Acc:MGI:2446216]	Fbxo2	-0.00897255	1	0.619591	0.0001	-0.259245	0.9027	-0.417016	0.0038
clusterin associated protein 1 [Source:MGI Symbol;Acc:MGI:1924029]	Cluap1	-0.603645	0.0001	-1.15782	0	-0.408556	0	-0.416972	0.0001
general transcription factor IIIC, polypeptide 6, alpha [Source:MGI Symbol;Acc:MGI:1914621]	Gtf3c6	-0.235496	0.9514	-0.266793	0.9997	-0.243009	0.9911	-0.416789	0.0008
RIKEN cDNA 3110043A19 gene [Source:MGI Symbol;Acc:MGI:1920466]	3110043A19Rik	0.0872456	1	0.0545429	1	-0.1028	1	-0.416352	0.0016
tet methylcytosine dioxygenase 3 [Source:MGI Symbol;Acc:MGI:2446229]	Tet3	-0.184857	1	-0.423996	0	-0.016744	1	-0.416173	0.0579
branched chain ketoacid dehydrogenase kinase [Source:MGI Symbol;Acc:MGI:1276121]	Bckdk	-0.208061	1	-0.474653	0	-0.285894	0.4804	-0.415982	0.001
interferon activated gene 204 [Source:MGI Symbol;Acc:MGI:96429]	Ifi204	1.85318	0	3.3385	0	-0.265294	0.126	-0.415665	0
protein-tyrosine sulfotransferase 2 [Source:MGI Symbol;Acc:MGI:1309516]	Tpst2	-0.916094	0	-0.832437	0	-0.50834	0	-0.415349	0
DNA-damage inducible protein 2 [Source:MGI Symbol;Acc:MGI:1917244]	Ddi2	1.49722	0	1.9358	0	-0.20143	0.9919	-0.415176	0.0106
hairy and enhancer of split 6 (Drosophila) [Source:MGI Symbol;Acc:MGI:1859852]	Hes6	0.160869	1	0.560519	0.0017	-0.341155	0.3558	-0.414716	0
A kinase (PRKA) anchor protein 7 [Source:MGI Symbol;Acc:MGI:1859150]	Akap7	0.356042	0.0268	0.411383	0	-0.155711	1	-0.414714	0.3468
potassium channel, subfamily K, member 1 [Source:MGI Symbol;Acc:MGI:109322]	Kcnk1	-1.39284	0	-2.42937	0	-0.418257	0.0085	-0.414589	0.0483
src homology 2 domain-containing transforming protein C1 [Source:MGI Symbol;Acc:MGI:98296]	Shc1	-0.0616103	1	0.214137	1	-0.362024	0.0011	-0.41423	0.0002
signal sequence receptor, gamma [Source:MGI Symbol;Acc:MGI:1914687]	Ssr3	-0.209466	1	-0.481878	0	-0.726262	0	-0.414224	0
SCY1-like 3 (S. cerevisiae) [Source:MGI Symbol;Acc:MGI:1921385]	Scyl3	-0.164436	1	-0.303479	0.9365	-0.472601	0	-0.414207	0.0031
apoptosis, caspase activation inhibitor [Source:MGI Symbol;Acc:MGI:1921518]	Aven	-0.413795	0.0001	-0.344183	0.0132	-0.298419	0.0451	-0.414153	0.0001
leucyl-tRNA synthetase, mitochondrial [Source:MGI Symbol;Acc:MGI:2142973]	Lars2	0.37579	0.1207	-0.173742	1	-0.0688434	1	-0.414132	0.814
deafness, autosomal dominant 5 (human) [Source:MGI Symbol;Acc:MGI:1889850]	Dfna5	0.484499	0	0.38363	0.048	-0.286322	0.0798	-0.413978	0.0092
heterogeneous nuclear ribonucleoprotein A3 [Source:MGI Symbol;Acc:MGI:1917171]	Hnrnpa3	-0.447881	0.0022	-1.26432	0	-0.339604	0.0025	-0.413855	0.9121
WD repeat domain 41 [Source:MGI Symbol;Acc:MGI:2445123]	Wdr41	-0.387853	0.0072	-0.482005	0	-0.362332	0.0018	-0.413734	0.011
low-density lipoprotein receptor-related protein 10 [Source:MGI Symbol;Acc:MGI:1929480]	Lrp10	0.362184	0.1113	0.605637	0	-0.286943	0.0097	-0.413711	0.0008
methyl CpG binding protein 2 [Source:MGI Symbol;Acc:MGI:99918]	Mecp2	-0.000997247	1	0.991376	0	-0.202944	1	-0.413171	0.0616
lactamase, beta [Source:MGI Symbol;Acc:MGI:1933395]	Lactb	0.272489	0.9656	0.204441	0.9995	-0.936561	0	-0.412998	0
receptor-interacting serine-threonine kinase 4 [Source:MGI Symbol;Acc:MGI:1919638]	Ripk4	0.14483	1	0.435287	0	-0.0649688	1	-0.412779	0.0016
sarcalumenin [Source:MGI Symbol;Acc:MGI:2146620]	Srl	-0.596972	0.0001	-0.885417	0	-0.447755	0	-0.412364	0.0012
phosphoglycolate phosphatase [Source:MGI Symbol;Acc:MGI:1914328]	Pgp	-1.69562	0	-2.25655	0	-0.362134	0.0007	-0.412351	0.0006
ELOVL family member 6, elongation of long chain fatty acids (yeast) [Source:MGI Symbol;Acc:MGI:2156528]	Elovl6	-0.202941	1	-1.42681	0	-0.588222	0	-0.411973	0.0341
transmembrane protein 127 [Source:MGI Symbol;Acc:MGI:1916720]	Tmem127	0.692954	0.0001	1.36277	0	-0.209512	1	-0.411927	0.037
ring finger protein 138 [Source:MGI Symbol;Acc:MGI:1929211]	Rnf138	-0.203073	1	-0.511699	0	-0.867671	0	-0.411788	0.0151
lactate dehydrogenase A [Source:MGI Symbol;Acc:MGI:96759]	Ldha	-0.556188	0.001	-2.32498	0	0.0184063	1	-0.41175	0.0372
junctophilin 1 [Source:MGI Symbol;Acc:MGI:1891495]	Jph1	0.0803029	1	0.0325241	1	0.028555	1	-0.411654	1
alkylglycerone phosphate synthase [Source:MGI Symbol;Acc:MGI:2443065]	Agps	-0.384578	0.0064	-0.870654	0	-0.469234	0	-0.411644	0.0012
BRISC and BRCA1 A complex member 1 [Source:MGI Symbol;Acc:MGI:1915501]	Babam1	0.401816	0.0001	0.877564	0	-0.268464	0.302	-0.411627	0.0282
inositol 1,4,5-trisphosphate 3-kinase C [Source:MGI Symbol;Acc:MGI:2442554]	Itpkc	-0.112517	1	0.150716	1	-0.173554	1	-0.411579	0.6633
microtubule associated serine/threonine kinase family member 4 [Source:MGI Symbol;Acc:MGI:1918885]	Mast4	0.63062	0	0.605267	0	0.0944793	1	-0.411491	0.0232
ankyrin repeat and KH domain containing 1 [Source:MGI Symbol;Acc:MGI:1921733]	Ankhd1	-0.141234	1	0.379033	0.0053	-0.23406	0.9907	-0.411431	0.0009
FBJ osteosarcoma oncogene [Source:MGI Symbol;Acc:MGI:95574]	Fos	2.05048	0	1.5485	0	0.0919909	1	-0.411353	0.0889
feminization 1 homolog b (C. elegans) [Source:MGI Symbol;Acc:MGI:1335087]	Fem1b	-0.0829686	1	-0.360801	0.0027	-0.206991	1	-0.411222	0.0006
SUB1 homolog (S. cerevisiae) [Source:MGI Symbol;Acc:MGI:104811]	Sub1	-0.105546	1	-0.706208	0	-0.357997	0.5412	-0.411201	0.0034
WD repeat and SOCS box-containing 2 [Source:MGI Symbol;Acc:MGI:2144041]	Wsb2	-0.652675	0	-0.808485	0	-0.211717	1	-0.410931	0.0215
acyl-CoA synthetase long-chain family member 5 [Source:MGI Symbol;Acc:MGI:1919129]	Acsl5	-0.85419	0	-1.11543	0	-0.573351	0	-0.410919	0
heme oxygenase (decycling) 2 [Source:MGI Symbol;Acc:MGI:109373]	Hmox2	-0.411289	0.0012	-0.347281	0.0103	-0.378986	0.0176	-0.410892	0.0037
DPH3 homolog (KTI11, S. cerevisiae) [Source:MGI Symbol;Acc:MGI:1922658]	Dph3	-0.0199557	1	-0.308932	0.2485	-0.251838	0.3515	-0.410796	0.2843
myosin XVIIIA [Source:MGI Symbol;Acc:MGI:2667185]	Myo18a	0.177612	1	0.0431065	1	0.00749693	1	-0.410681	0.3219
potassium inwardly-rectifying channel, subfamily J, member 15 [Source:MGI Symbol;Acc:MGI:1310000]	Kcnj15	0.29211	0.6272	0.792264	0.0017	-0.095361	1	-0.410612	0.0014
SEH1-like (S. cerevisiae [Source:MGI Symbol;Acc:MGI:1919374]	Seh1l	-0.531817	0	-0.958687	0	-0.199545	1	-0.410265	0.0003
YME1-like 1 (S. cerevisiae) [Source:MGI Symbol;Acc:MGI:1351651]	Yme1l1	-0.0728287	1	-0.522824	0	-0.652797	0	-0.410208	0.1532
fyn-related kinase [Source:MGI Symbol;Acc:MGI:103265]	Frk	0.180963	1	0.877053	0	-0.27801	1	-0.410191	0.0143
ring finger protein 170 [Source:MGI Symbol;Acc:MGI:1924983]	Rnf170	-0.0108261	1	-0.186045	1	-0.442901	0.0024	-0.410152	0.1329
suppressor of cytokine signaling 6 [Source:MGI Symbol;Acc:MGI:1924885]	Socs6	0.0536118	1	0.0616933	1	-0.33794	0.5122	-0.410129	0.0037
apoptosis inhibitor 5 [Source:MGI Symbol;Acc:MGI:1888993]	Api5	0.153715	1	0.228529	0.7836	-0.348041	0	-0.409598	0.0003
neural proliferation, differentiation and control gene 1 [Source:MGI Symbol;Acc:MGI:1099802]	Npdc1	0.53079	0	1.28682	0	-0.300569	0.3226	-0.409384	0.0226
VPS33B interacting protein, apical-basolateral polarity regulator, spe-39 homolog [Source:MGI Symbol;Acc:MGI:2144805]	Vipas39	0.0944388	1	0.976899	0	-0.140134	1	-0.408849	0
HEAT repeat containing 2 [Source:MGI Symbol;Acc:MGI:3616079]	Heatr2	-0.746388	0	-1.14151	0	-0.598127	0	-0.40874	0.9573
proteasome (prosome, macropain) 26S subunit, non-ATPase, 6 [Source:MGI Symbol;Acc:MGI:1913663]	Psmd6	-0.03225	1	0.163769	1	-0.206527	0.9537	-0.408702	0.0002
tubulin, alpha 1B [Source:MGI Symbol;Acc:MGI:107804]	Tuba1b	-0.825808	0	-1.44038	0	-0.468006	0.0005	-0.408604	0.3127
UDP-N-acetyl-alpha-D-galactosamine:polypeptide N-acetylgalactosaminyltransferase 4 [Source:MGI Symbol;Acc:MGI:894692]	Galnt4	-0.0558057	1	-0.469911	0.0011	-0.217602	1	-0.407999	1
guanylate-binding protein 9 [Source:MGI Symbol;Acc:MGI:3605620]	Gbp9	0.194856	1	1.41177	0	-0.0214309	1	-0.407764	0.8573
serine/arginine-rich splicing factor 7 [Source:MGI Symbol;Acc:MGI:1926232]	Srsf7	-1.53928	0	-2.37305	0	-0.515053	0.001	-0.407387	0.0561
pyruvate kinase, muscle [Source:MGI Symbol;Acc:MGI:97591]	Pkm	-0.361798	1	-1.60102	0	-0.00468482	1	-0.40714	1
transmembrane protein, adipocyte asscociated 1 [Source:MGI Symbol;Acc:MGI:1345190]	Tpra1	-0.0913008	1	0.0688909	1	-0.019846	1	-0.406918	0.0059
ATPase, H+ transporting, lysosomal V1 subunit A [Source:MGI Symbol;Acc:MGI:1201780]	Atp6v1a	0.0450934	1	0.685563	0	-0.48007	0	-0.406912	0.0047
OMA1 homolog, zinc metallopeptidase (S. cerevisiae) [Source:MGI Symbol;Acc:MGI:1914263]	Oma1	-0.154448	1	-0.309712	0.4835	-0.342475	0.172	-0.406859	0.0002
zinc finger with KRAB and SCAN domains 1 [Source:MGI Symbol;Acc:MGI:1921820]	Zkscan1	-0.158884	1	0.247271	1	-0.225165	1	-0.406728	0.1297
transmembrane protein 128 [Source:MGI Symbol;Acc:MGI:1913559]	Tmem128	0.248328	1	0.653546	0	-0.345103	0.096	-0.406442	0.0232
coiled-coil domain containing 71 [Source:MGI Symbol;Acc:MGI:1919704]	Ccdc71	-0.00309212	1	0.313234	0.0573	-0.27481	0.2362	-0.406442	0.0002
secreted acidic cysteine rich glycoprotein [Source:MGI Symbol;Acc:MGI:98373]	Sparc	0.61728	0	1.02377	0	-0.512016	0	-0.406428	0.0002
transmembrane BAX inhibitor motif containing 6 [Source:MGI Symbol;Acc:MGI:99682]	Tmbim6	0.387539	1	0.67017	0	-0.0523473	1	-0.406279	0.0108
biogenesis of lysosome-related organelles complex-1, subunit 1 [Source:MGI Symbol;Acc:MGI:1195276]	Bloc1s1	0.0322984	1	0.223694	0.965	-0.262827	0.9998	-0.406229	0.0001
RIKEN cDNA 1110001J03 gene [Source:MGI Symbol;Acc:MGI:1913367]	1110001J03Rik	-0.0829686	1	-1.25208	0	-0.329248	0.8769	-0.406222	0.0151
glycoprotein m6b [Source:MGI Symbol;Acc:MGI:107672]	Gpm6b	-0.25219	0.9993	-0.427114	0.1738	-0.584276	0	-0.405184	0.0175
ribonuclease H2, subunit C [Source:MGI Symbol;Acc:MGI:1915459]	Rnaseh2c	-0.247361	0.9871	-1.85659	0	-0.284497	0.0137	-0.405121	0.0047
mitochondrially encoded ATP synthase 6 [Source:MGI Symbol;Acc:MGI:99927]	mt-Atp6	0.472883	1	0.654252	0	-0.337468	1	-0.405041	1
eukaryotic translation initiation factor 4 gamma, 3 [Source:MGI Symbol;Acc:MGI:1923935]	Eif4g3	0.152287	1	0.881899	0	-0.344154	0.0015	-0.404932	0.0027
cell division cycle 37-like 1 [Source:MGI Symbol;Acc:MGI:1914322]	Cdc37l1	-0.238643	0.9998	-0.0638374	1	-0.532654	0	-0.404825	0.0005
carcinoembryonic antigen-related cell adhesion molecule 14 [Source:MGI Symbol;Acc:MGI:1914334]	Ceacam14	-0.0959823	1	-0.331229	0.8534	-0.465305	0	-0.404378	0.004
serine/threonine kinase 11 [Source:MGI Symbol;Acc:MGI:1341870]	Stk11	0.344306	0.0015	0.695005	0	-0.315898	0.1366	-0.404261	0.0209
transmembrane protein 62 [Source:MGI Symbol;Acc:MGI:2139461]	Tmem62	1.39721	0	1.6891	0	-0.149687	1	-0.404107	0.5703
aldo-keto reductase family 1, member C12 [Source:MGI Symbol;Acc:MGI:1351661]	Akr1c12	1.62505	0	2.35244	0	-0.193785	0.9995	-0.403752	0.673
uroplakin 3B-like [Source:MGI Symbol;Acc:MGI:1916915]	Upk3bl	1.2047	0	2.36751	0	-0.697413	0	-0.403364	0.0117
predicted gene 14676 [Source:MGI Symbol;Acc:MGI:3705524]	Gm14676	-0.590638	0.0016	-2.38119	0	-0.0338132	1	-0.403189	0.2657
tubulin, gamma 1 [Source:MGI Symbol;Acc:MGI:101834]	Tubg1	-1.17458	0	-2.53022	0	-0.269269	1	-0.403156	0
coactosin-like 1 (Dictyostelium) [Source:MGI Symbol;Acc:MGI:1919292]	Cotl1	0.211997	1	-0.108651	1	-0.0401468	1	-0.403034	1
RNA binding motif protein 4 [Source:MGI Symbol;Acc:MGI:1100865]	Rbm4	0.049338	1	-0.370975	0.0018	-0.174047	1	-0.402863	0.0059
proteasome (prosome, macropain) 26S subunit, non-ATPase, 12 [Source:MGI Symbol;Acc:MGI:1914247]	Psmd12	-0.489893	0	-0.406327	0.0001	-0.354048	0	-0.402859	0.0294
nuclear receptor coactivator 7 [Source:MGI Symbol;Acc:MGI:2444847]	Ncoa7	1.05471	0	1.44755	0	-0.39219	0.0001	-0.402407	0.0014
karyopherin (importin) alpha 1 [Source:MGI Symbol;Acc:MGI:103560]	Kpna1	-0.0651876	1	0.469948	0	-0.482769	0.0117	-0.402313	0.0267
BRICHOS domain containing 5 [Source:MGI Symbol;Acc:MGI:2441766]	Bricd5	-0.910157	0	-1.2944	0	-0.176591	1	-0.402178	0
ethanolamine kinase 1 [Source:MGI Symbol;Acc:MGI:1922570]	Etnk1	-0.573284	0.0023	-0.797313	0	-0.113583	1	-0.402033	0.0568
Max dimerization protein 4 [Source:MGI Symbol;Acc:MGI:104991]	Mxd4	2.18135	0	2.99354	0	0.259821	0.9392	-0.401591	0.0057
potassium channel tetramerisation domain containing 10 [Source:MGI Symbol;Acc:MGI:2141207]	Kctd10	0.809612	0	0.998614	0	-0.403464	0	-0.401414	0.0247
Ras-related GTP binding D [Source:MGI Symbol;Acc:MGI:1098604]	Rragd	-0.194689	1	-0.643137	0	-0.234781	0.8744	-0.401391	0.0052
tyrosine kinase, non-receptor, 2 [Source:MGI Symbol;Acc:MGI:1858308]	Tnk2	-0.0717093	1	-0.232925	0.9993	-0.235805	0.9587	-0.401349	0.0091
ADP-ribosylation factor-like 15 [Source:MGI Symbol;Acc:MGI:2442308]	Arl15	-1.10828	0	-1.2728	0	-0.556476	0	-0.401317	0.0662
ubiquitin-conjugating enzyme E2L 3 [Source:MGI Symbol;Acc:MGI:109240]	Ube2l3	-0.232813	1	-0.0457456	1	-0.453891	0	-0.401067	0.0028
large tumor suppressor [Source:MGI Symbol;Acc:MGI:1333883]	Lats1	-0.0892858	1	-0.341669	1	-0.342104	0.0002	-0.400974	0.0003
high-mobility group nucleosome binding domain 5 [Source:MGI Symbol;Acc:MGI:1355295]	Hmgn5	0.627541	0	-0.322935	0.0275	-0.471023	0	-0.400943	0.0145
poly(rC) binding protein 1 [Source:MGI Symbol;Acc:MGI:1345635]	Pcbp1	-0.633148	0	-0.458531	0.0632	-0.449956	0.0352	-0.400901	0.4723
coiled-coil domain containing 109A [Source:MGI Symbol;Acc:MGI:3026965]	Ccdc109a	-0.0352657	1	-0.376687	0.0002	-0.214848	1	-0.400777	0.1323
peptidyl-tRNA hydrolase 2 [Source:MGI Symbol;Acc:MGI:2444848]	Ptrh2	-0.835793	0	-1.35008	0	-0.49602	0	-0.400743	0.0002
predicted pseudogene 4989 [Source:MGI Symbol;Acc:MGI:3643860]	Gm4989	-0.335202	0.0189	-0.597167	0	-0.179459	1	-0.400218	0.0034
tRNA nucleotidyl transferase, CCA-adding, 1 [Source:MGI Symbol;Acc:MGI:1917297]	Trnt1	-0.129904	1	-0.116007	1	-0.696527	0	-0.400111	0
guanine nucleotide binding protein (G protein), gamma 12 [Source:MGI Symbol;Acc:MGI:1336171]	Gng12	0.822086	0	1.53312	0	-0.960168	0	-0.400002	0.2437
plectin [Source:MGI Symbol;Acc:MGI:1277961]	Plec	-0.390156	0.0022	-0.545658	0.0006	-0.252207	0.5976	-0.39969	0.0127
bicaudal D homolog 1 (Drosophila) [Source:MGI Symbol;Acc:MGI:1101760]	Bicd1	-0.230257	1	-0.225062	1	-0.212454	1	-0.399576	0.1847
frizzled homolog 2 (Drosophila) [Source:MGI Symbol;Acc:MGI:1888513]	Fzd2	-0.244283	1	-0.53343	0	-0.383309	0	-0.399388	0.0002
ring finger protein, transmembrane 1 [Source:MGI Symbol;Acc:MGI:1924142]	Rnft1	0.0791152	1	-0.654974	0	-0.487862	0.0182	-0.398796	0.299
TBC1 domain family, member 8B [Source:MGI Symbol;Acc:MGI:1918101]	Tbc1d8b	0.0441283	1	-0.458798	0.0713	-0.242154	1	-0.39879	0.0339
endosulfine alpha [Source:MGI Symbol;Acc:MGI:1891189]	Ensa	0.142806	1	-0.252346	0.9988	-0.364671	0.0041	-0.398621	0.1165
thioredoxin-related transmembrane protein 3 [Source:MGI Symbol;Acc:MGI:2442418]	Tmx3	-0.0148406	1	-0.702003	0	-0.60308	0	-0.398594	0.0012
vacuolar protein sorting 26 homolog B (yeast) [Source:MGI Symbol;Acc:MGI:1917656]	Vps26b	-0.415771	0.0158	-0.429807	0	-0.27334	0.7424	-0.398368	0.0002
SCY1-like 3 (S. cerevisiae) [Source:MGI Symbol;Acc:MGI:1921385]	Scyl3	0.0977726	1	0.283863	0.979	-0.265303	0.8992	-0.398224	0
vimentin [Source:MGI Symbol;Acc:MGI:98932]	Vim	-0.384463	0.8673	-0.424761	0.9941	-0.209847	1	-0.398075	1
proteasome (prosome, macropain) 26S subunit, non-ATPase, 3 [Source:MGI Symbol;Acc:MGI:98858]	Psmd3	-0.597634	0	-0.431151	0.0009	-0.287924	0.0118	-0.39802	0
ribonuclease H2, subunit B [Source:MGI Symbol;Acc:MGI:1914403]	Rnaseh2b	-0.250625	0.7692	-1.09384	0	-0.153589	1	-0.397708	0.0003
parvin, alpha [Source:MGI Symbol;Acc:MGI:1931144]	Parva	0.033793	1	-0.204206	1	-0.152856	1	-0.397511	0.3331
zinc finger protein 62 [Source:MGI Symbol;Acc:MGI:99662]	Zfp62	0.465212	0	0.761353	0	-0.15183	1	-0.397389	0.0022
transmembrane emp24 domain containing 1 [Source:MGI Symbol;Acc:MGI:106201]	Tmed1	-0.778959	0	-1.93889	0	-0.299457	0.3558	-0.397152	0.0006
zinc finger protein 687 [Source:MGI Symbol;Acc:MGI:1925516]	Zfp687	-0.380016	0.1194	-0.110344	1	-0.292537	0.1151	-0.397004	0.0088
neuralized homolog 1A (Drosophila) [Source:MGI Symbol;Acc:MGI:1334263]	Neurl1a	0.0412149	1	0.215716	0.9749	-0.204926	1	-0.396821	0.5291
solute carrier family 33 (acetyl-CoA transporter), member 1 [Source:MGI Symbol;Acc:MGI:1332247]	Slc33a1	0.0333137	1	0.174892	1	-0.363072	0	-0.396812	0.0194
BRISC and BRCA1 A complex member 1 [Source:MGI Symbol;Acc:MGI:1915501]	Babam1	0.351402	0.2148	0.697391	0	-0.120297	1	-0.3968	0.1236
nuclear factor of activated T cells 5 [Source:MGI Symbol;Acc:MGI:1859333]	Nfat5	-0.296649	0.2799	-0.475589	0	-0.346001	0.1051	-0.396701	0.0297
Yip1 domain family, member 3 [Source:MGI Symbol;Acc:MGI:106280]	Yipf3	0.756554	0	1.16543	0	-0.070568	1	-0.396646	0.6084
cysteine sulfinic acid decarboxylase [Source:MGI Symbol;Acc:MGI:2180098]	Csad	0.614352	0	0.966349	0	-0.250979	1	-0.396149	0.1615
NIMA (never in mitosis gene a)-related expressed kinase 6 [Source:MGI Symbol;Acc:MGI:1891638]	Nek6	-0.281532	1	0.1133	1	-0.302365	0.5722	-0.396145	0.0754
solute carrier family 33 (acetyl-CoA transporter), member 1 [Source:MGI Symbol;Acc:MGI:1332247]	Slc33a1	0.0928704	1	0.230338	0.9997	-0.387253	0.0001	-0.395889	0.9268
nuclear RNA export factor 1 [Source:MGI Symbol;Acc:MGI:1858330]	Nxf1	-0.471989	0.0543	-0.837898	0	-0.075257	1	-0.395676	0.0012
DEAD (Asp-Glu-Ala-Asp) box polypeptide 10 [Source:MGI Symbol;Acc:MGI:1924841]	Ddx10	-0.327394	0.2373	-0.377244	0.0147	-0.656151	0	-0.395667	0.006
guanylate binding protein 4 [Source:MGI Symbol;Acc:MGI:97072]	Gbp4	0.0218919	1	1.91598	0	0.0436245	1	-0.395543	0.0545
trinucleotide repeat containing 6b [Source:MGI Symbol;Acc:MGI:2443730]	Tnrc6b	1.06339	0	1.6714	0	-0.149249	1	-0.395469	0.041
mitochondrial ribosomal protein L54 [Source:MGI Symbol;Acc:MGI:1913297]	Mrpl54	0.224485	0.9886	0.0446319	1	-0.22803	0.9597	-0.395376	0.0032
PTK7 protein tyrosine kinase 7 [Source:MGI Symbol;Acc:MGI:1918711]	Ptk7	-0.0270016	1	-0.248512	0.5067	-0.071873	1	-0.395088	0.9844
ATP-binding cassette, sub-family A (ABC1), member 3 [Source:MGI Symbol;Acc:MGI:1351617]	Abca3	-0.0570524	1	0.297144	1	-0.439242	0.0001	-0.394773	0.0667
dual serine/threonine and tyrosine protein kinase [Source:MGI Symbol;Acc:MGI:1925064]	Dstyk	1.33565	0	1.81483	0	-0.217122	0.831	-0.394597	0.0016
SH3 and PX domains 2B [Source:MGI Symbol;Acc:MGI:2442062]	Sh3pxd2b	-0.40484	0.0109	-0.032579	1	-0.0801169	1	-0.394555	0.0014
nuclear receptor interacting protein 1 [Source:MGI Symbol;Acc:MGI:1315213]	Nrip1	0.00920383	1	0.0394332	1	-0.0638238	1	-0.394401	0.9935
tetratricopeptide repeat domain 13 [Source:MGI Symbol;Acc:MGI:2384573]	Ttc13	-0.806014	0	-1.10132	0	-0.10397	1	-0.394365	0.0002
cylindromatosis (turban tumor syndrome) [Source:MGI Symbol;Acc:MGI:1921506]	Cyld	0.70764	0	0.730131	0	-0.688534	0	-0.394187	0.0016
N(alpha)-acetyltransferase 30, NatC catalytic subunit [Source:MGI Symbol;Acc:MGI:1922259]	Naa30	0.265293	1	0.0852343	1	-0.551408	0.0018	-0.394032	0.021
2-aminoethanethiol (cysteamine) dioxygenase [Source:MGI Symbol;Acc:MGI:2685083]	Ado	-0.579294	0	-0.798833	0	-0.248447	1	-0.393988	0.0664
regulator of chromosome condensation (RCC1) and BTB (POZ) domain containing protein 1 [Source:MGI Symbol;Acc:MGI:1918580]	Rcbtb1	-0.725856	0	-1.06285	0	-0.372772	0	-0.393783	0.0218
transmembrane emp24 protein transport domain containing 7 [Source:MGI Symbol;Acc:MGI:1913926]	Tmed7	-0.215642	1	-0.401953	0.0024	-0.42647	0	-0.393766	0.1262
myoglobin [Source:MGI Symbol;Acc:MGI:96922]	Mb	-0.446457	0.007	0.161707	1	-0.0667446	1	-0.393694	0.9949
vacuolar protein sorting 18 (yeast) [Source:MGI Symbol;Acc:MGI:2443626]	Vps18	0.277021	1	0.491884	0	-0.422269	0.0001	-0.393613	0.1743
LSM domain containing 1 [Source:MGI Symbol;Acc:MGI:1925554]	Lsmd1	-0.135196	1	-0.222372	0.8199	-0.212935	0.7146	-0.393569	0.0039
cell adhesion molecule 1 [Source:MGI Symbol;Acc:MGI:1889272]	Cadm1	0.404642	0.0167	0.0434145	1	-0.010162	1	-0.393516	0.5186
protein phosphatase 1D magnesium-dependent, delta isoform [Source:MGI Symbol;Acc:MGI:1858214]	Ppm1d	0.0599367	1	-0.0721005	1	-0.156909	1	-0.393429	0.0121
ribonuclease H2, subunit B [Source:MGI Symbol;Acc:MGI:1914403]	Rnaseh2b	-0.184734	1	-1.14937	0	-0.207774	0.9997	-0.393311	0.0086
MAP kinase-activated protein kinase 5 [Source:MGI Symbol;Acc:MGI:1333110]	Mapkapk5	0.02697	1	-0.085734	1	-0.314889	1	-0.392993	0.0012
carbonic anhydrase 9 [Source:MGI Symbol;Acc:MGI:2447188]	Car9	-0.329261	0.0022	-0.856304	0	-0.170538	1	-0.392499	0.0054
solute carrier family 25, member 30 [Source:MGI Symbol;Acc:MGI:1914804]	Slc25a30	0.249773	0.514	0.267883	0.9108	-0.399768	0	-0.392393	0
down-regulator of transcription 1 [Source:MGI Symbol;Acc:MGI:1100515]	Dr1	0.203013	1	0.552682	0.0103	-0.46059	0	-0.392118	0.0085
GID complex subunit 8 homolog (S. cerevisiae) [Source:MGI Symbol;Acc:MGI:1923675]	Gid8	-0.239845	1	-0.13788	1	-0.154907	1	-0.392109	0
fragile X mental retardation gene 1, autosomal homolog [Source:MGI Symbol;Acc:MGI:104860]	Fxr1	-0.294898	0.7948	-0.51684	0	-0.1812	1	-0.392092	0.0015
mitogen-activated protein kinase 1 [Source:MGI Symbol;Acc:MGI:1346858]	Mapk1	-0.45609	0	-0.8518	0	-0.49749	0.0001	-0.391995	0.0018
cell adhesion molecule 1 [Source:MGI Symbol;Acc:MGI:1889272]	Cadm1	0.152183	1	-0.41712	0.0001	-0.169333	1	-0.391923	0.0193
1-acylglycerol-3-phosphate O-acyltransferase 2 (lysophosphatidic acid acyltransferase, beta) [Source:MGI Symbol;Acc:MGI:1914762]	Agpat2	-0.683687	0	-0.915775	0	-0.266911	0.5773	-0.391596	0.53
zinc finger, DHHC domain containing 5 [Source:MGI Symbol;Acc:MGI:1923573]	Zdhhc5	0.0115529	1	0.690229	0	-0.402765	0	-0.39135	0.009
RIKEN cDNA A830007P12 gene [Source:MGI Symbol;Acc:MGI:2442720]	A830007P12Rik	0.319075	0.0067	0.858697	0	-0.18166	1	-0.391299	0.5962
Ras association (RalGDS/AF-6) domain family (N-terminal) member 8 [Source:MGI Symbol;Acc:MGI:1918573]	Rassf8	0.0437644	1	0.036651	1	-0.0233387	1	-0.390939	1
ubiquitin-conjugating enzyme E2G 1 [Source:MGI Symbol;Acc:MGI:1914378]	Ube2g1	-0.474577	0	-0.310942	0.5674	-0.274227	0.9662	-0.390884	0.0902
nuclear receptor coactivator 4 [Source:MGI Symbol;Acc:MGI:1350932]	Ncoa4	-0.175138	1	0.536083	0	-0.410074	0.0006	-0.390758	0.0003
ubiquitin-conjugating enzyme E2F (putative) [Source:MGI Symbol;Acc:MGI:1915171]	Ube2f	0.81437	0	1.13094	0	-0.325756	0.0006	-0.390689	0.025
prolyl 4-hydroxylase, beta polypeptide [Source:MGI Symbol;Acc:MGI:97464]	P4hb	-0.713031	0	-1.32816	0	-0.187863	1	-0.390612	0.0008
par-3 (partitioning defective 3) homolog (C. elegans) [Source:MGI Symbol;Acc:MGI:2135608]	Pard3	0.139155	1	0.486488	0	-0.423368	0.0004	-0.390472	0.0375
tumor suppressor candidate 3 [Source:MGI Symbol;Acc:MGI:1933134]	Tusc3	-0.0296043	1	-0.426371	0	-0.237061	1	-0.39034	0.0128
predicted gene 4737 [Source:MGI Symbol;Acc:MGI:3643647]	Gm4737	-0.0936697	1	-1.66454	0	-0.152364	1	-0.3902	0.0002
catenin beta interacting protein 1 [Source:MGI Symbol;Acc:MGI:1915756]	Ctnnbip1	-1.28539	0	-1.8355	0	-0.514445	0	-0.39016	0.4977
nucleoredoxin [Source:MGI Symbol;Acc:MGI:109331]	Nxn	-1.15435	0	-1.57648	0	-0.156608	1	-0.390158	0.0006
acyl-Coenzyme A dehydrogenase, medium chain [Source:MGI Symbol;Acc:MGI:87867]	Acadm	1.08689	0	1.64142	0	-0.284606	1	-0.390067	0.7587
heterogeneous nuclear ribonucleoprotein A3 [Source:MGI Symbol;Acc:MGI:1917171]	Hnrnpa3	-0.359479	0.4317	-1.29798	0	-0.20909	1	-0.38999	0.0732
Rho-related BTB domain containing 3 [Source:MGI Symbol;Acc:MGI:1920546]	Rhobtb3	-0.594779	0	-0.795757	0	-0.410058	0.1249	-0.389916	0.1186
phosphatidylinositol-5-phosphate 4-kinase, type II, beta [Source:MGI Symbol;Acc:MGI:1934234]	Pip4k2b	-0.861791	0	-1.02054	0	-0.418967	0.0401	-0.389763	0.1801
family with sequence similarity 120B [Source:MGI Symbol;Acc:MGI:1914794]	Fam120b	0.368567	0.0012	1.00069	0	-0.219987	0.9998	-0.389536	0.0001
dispatched homolog 1 (Drosophila) [Source:MGI Symbol;Acc:MGI:1916147]	Disp1	0.328239	0.0766	0.781209	0	-0.313818	0.0029	-0.389512	0.0341
integrin beta 4 [Source:MGI Symbol;Acc:MGI:96613]	Itgb4	-0.32804	0.3258	-0.0310172	1	-0.0232874	1	-0.389464	0.0328
C-type lectin domain family 11, member a [Source:MGI Symbol;Acc:MGI:1298219]	Clec11a	-0.148492	1	-0.193062	1	-0.332842	0.0004	-0.389336	0.2517
PARP1 binding protein [Source:MGI Symbol;Acc:MGI:1922567]	Parpbp	-1.10473	0	-3.19127	0	-0.564083	0	-0.389298	0
methionine adenosyltransferase II, alpha [Source:MGI Symbol;Acc:MGI:2443731]	Mat2a	-2.11174	0	-1.98074	0	-0.190781	1	-0.389162	0.0272
DET1 and DDB1 associated 1 [Source:MGI Symbol;Acc:MGI:1913748]	Dda1	-0.00202697	1	-0.062963	1	-0.228439	0.9834	-0.389151	0.0068
rabaptin, RAB GTPase binding effector protein 2 [Source:MGI Symbol;Acc:MGI:1917564]	Rabep2	0.186323	1	0.815182	0	-0.307739	0.994	-0.389092	0.0185
family with sequence similarity 161, member B [Source:MGI Symbol;Acc:MGI:2443027]	Fam161b	-0.212138	1	-0.248339	1	-0.0753817	1	-0.388788	0.0146
DnaJ (Hsp40) homolog, subfamily C, member 27 [Source:MGI Symbol;Acc:MGI:2443036]	Dnajc27	0.0590229	1	0.116684	1	-0.377874	0.0056	-0.388614	0.1219
tetratricopeptide repeat domain 30A1 [Source:MGI Symbol;Acc:MGI:1926052]	Ttc30a1	0.48906	0	0.370622	0.2825	-0.111031	1	-0.388563	0.0234
testis-specific protein, Y-encoded-like 1 [Source:MGI Symbol;Acc:MGI:1298395]	Tspyl1	1.1749	0	1.96299	0	-0.402887	0.2575	-0.388378	0.0912
CTD (carboxy-terminal domain, RNA polymerase II, polypeptide A) small phosphatase like 2 [Source:MGI Symbol;Acc:MGI:1196405]	Ctdspl2	-0.233863	1	-0.261798	0.9505	-0.310363	0.1373	-0.387868	0.0003
zinc finger protein 326 [Source:MGI Symbol;Acc:MGI:1927246]	Zfp326	0.437824	0.0001	-0.791685	0	-0.199085	1	-0.387632	0.098
predicted gene 13315 [Source:MGI Symbol;Acc:MGI:3651096]	Gm13315	-0.680676	0.0001	-2.3354	0	0.0068653	1	-0.387591	0.2527
importin 4 [Source:MGI Symbol;Acc:MGI:1923001]	Ipo4	-0.564969	0	-0.548301	0	-0.1448	1	-0.387464	0.0755
ATP-binding cassette, sub-family B (MDR/TAP), member 8 [Source:MGI Symbol;Acc:MGI:1351667]	Abcb8	0.287059	1	0.215654	1	-0.0642355	1	-0.386921	0.0754
N(alpha)-acetyltransferase 16, NatA auxiliary subunit [Source:MGI Symbol;Acc:MGI:1914147]	Naa16	-1.34	0	-1.85693	0	-0.531688	0	-0.386902	0.0533
SEC63-like (S. cerevisiae) [Source:MGI Symbol;Acc:MGI:2155302]	Sec63	-0.0975775	1	-0.197425	1	-0.269688	0.4713	-0.386776	0.0001
thioredoxin-related transmembrane protein 3 [Source:MGI Symbol;Acc:MGI:2442418]	Tmx3	0.0431905	1	-0.524263	0.0001	-0.536097	0	-0.386617	0.0002
SDA1 domain containing 1 [Source:MGI Symbol;Acc:MGI:2140779]	Sdad1	-1.15781	0	-1.37135	0	-0.46741	0	-0.386568	0.0233
nuclear factor I/B [Source:MGI Symbol;Acc:MGI:103188]	Nfib	-0.514326	0	-0.59206	0	-0.261334	0.7699	-0.386483	0.0102
L-3-hydroxyproline dehydratase (trans-) [Source:MGI Symbol;Acc:MGI:1914467]	L3hypdh	-0.90098	0	-1.33457	0	-0.760077	0	-0.386382	0.0689
GINS complex subunit 1 (Psf1 homolog) [Source:MGI Symbol;Acc:MGI:1916520]	Gins1	-0.466698	0.0054	-2.46009	0	-0.396755	0.0001	-0.386346	0.0033
olfactory receptor 13 [Source:MGI Symbol;Acc:MGI:104812]	Olfr13	0.140281	1	0.00324242	1	-0.360251	0.0733	-0.386133	0.9959
mitchondrial ribosomal protein S7 [Source:MGI Symbol;Acc:MGI:1354367]	Mrps7	-1.24399	0	-2.18993	0	-0.526286	0	-0.386001	0.0308
epithelial splicing regulatory protein 2 [Source:MGI Symbol;Acc:MGI:1924661]	Esrp2	-0.889068	0	-0.603124	0	-0.235151	1	-0.385952	0.0314
RB-associated KRAB repressor [Source:MGI Symbol;Acc:MGI:1927369]	Rbak	-0.26574	1	-0.319955	0.9883	-0.180517	1	-0.385923	0.29
transient receptor potential cation channel, subfamily C, member 4 associated protein [Source:MGI Symbol;Acc:MGI:1930751]	Trpc4ap	0.731366	0	0.949864	0	-0.289737	0.2362	-0.385793	0.0193
7SK RNA [Source:RFAM;Acc:RF00100]	7SK	-0.0515188	1	0.0282297	1	0.0491707	1	-0.385271	1
endonuclease domain containing 1 [Source:MGI Symbol;Acc:MGI:1919196]	Endod1	-1.34787	0	-1.39518	0	-0.91693	0	-0.385179	0.0094
testis expressed gene 9 [Source:MGI Symbol;Acc:MGI:1201610]	Tex9	-0.705253	0	-1.3014	0	-0.388813	0.0928	-0.385026	0.06
RIKEN cDNA 3110062M04 gene [Source:MGI Symbol;Acc:MGI:1925662]	3110062M04Rik	-0.219016	0.9998	-1.06588	0	-0.270485	0.9459	-0.385015	0.9781
abhydrolase domain containing 6 [Source:MGI Symbol;Acc:MGI:1913332]	Abhd6	-0.114968	1	0.0410747	1	-0.0261492	1	-0.384887	0.0189
formin-like 2 [Source:MGI Symbol;Acc:MGI:1918659]	Fmnl2	-0.036153	1	-0.077248	1	-0.0793759	1	-0.384749	1
family with sequence similarity 179, member B [Source:MGI Symbol;Acc:MGI:2684313]	Fam179b	-0.0563367	1	0.127131	1	-0.367512	0.0001	-0.384721	0.0108
lysosomal-associated membrane protein 2 [Source:MGI Symbol;Acc:MGI:96748]	Lamp2	0.169579	1	1.86856	0	-0.0530207	1	-0.384627	0.593
transmembrane emp24 protein transport domain containing 7 [Source:MGI Symbol;Acc:MGI:1913926]	Tmed7	-0.17822	1	-0.349686	0.0149	-0.369911	0.0001	-0.384608	0.0012
DEP domain containing 5 [Source:MGI Symbol;Acc:MGI:2141101]	Depdc5	0.632929	0	0.621252	0	-0.209518	0.9538	-0.3841	0.0016
Ly6/neurotoxin 1 [Source:MGI Symbol;Acc:MGI:1345180]	Lynx1	0.402668	0.0433	1.05393	0	0.100359	1	-0.383832	0.5981
methylcrotonoyl-Coenzyme A carboxylase 2 (beta) [Source:MGI Symbol;Acc:MGI:1925288]	Mccc2	0.354384	0.6898	1.34273	0	-0.209603	1	-0.383616	0.0085
molybdenum cofactor synthesis 2 [Source:MGI Symbol;Acc:MGI:1336894]	Mocs2	0.503176	0	1.17032	0	-0.342206	0.0001	-0.383479	0.006
microtubule associated monoxygenase, calponin and LIM domain containing 3 [Source:MGI Symbol;Acc:MGI:2442733]	Mical3	-0.21291	1	0.566094	0	-0.404309	0	-0.383447	0.1001
ribosomal protein S19 binding protein 1 [Source:MGI Symbol;Acc:MGI:1913788]	Rps19bp1	-0.43845	0.1397	-0.552486	0.0001	-0.282572	0.2474	-0.383226	0.097
plasma glutamate carboxypeptidase [Source:MGI Symbol;Acc:MGI:1889205]	Pgcp	-0.245448	0.9267	-0.19963	1	-0.254157	1	-0.38307	0.0016
ubiquitin-conjugating enzyme E2Q (putative) 2 [Source:MGI Symbol;Acc:MGI:2388672]	Ube2q2	0.16543	1	-0.346085	0.0188	0.0891591	1	-0.382899	0.0368
nuclear prelamin A recognition factor-like [Source:MGI Symbol;Acc:MGI:1914813]	Narfl	0.00473868	1	0.308524	0.0799	-0.244265	0.9028	-0.382886	0.0012
solute carrier family 25, member 30 [Source:MGI Symbol;Acc:MGI:1914804]	Slc25a30	-0.0972719	1	0.274268	0.9811	-0.401814	0.0001	-0.382801	0.0193
lectin, mannose-binding 2 [Source:MGI Symbol;Acc:MGI:1914140]	Lman2	-0.431141	0.0091	-0.311628	0.0836	-0.311243	0.001	-0.382762	0.0114
cytochrome b5 type B [Source:MGI Symbol;Acc:MGI:1913677]	Cyb5b	-1.00338	0	-1.26452	0	-0.335599	0.0005	-0.382758	0.0002
cell adhesion molecule 1 [Source:MGI Symbol;Acc:MGI:1889272]	Cadm1	0.258941	0.6016	-0.447772	0	-0.111457	1	-0.382685	0.9687
protease (prosome, macropain) 26S subunit, ATPase 5 [Source:MGI Symbol;Acc:MGI:105047]	Psmc5	-0.326274	0.2154	0.0254966	1	-0.30596	0.2413	-0.382647	0.7964
acyl-Coenzyme A dehydrogenase, short chain [Source:MGI Symbol;Acc:MGI:87868]	Acads	0.670514	0.4655	1.39264	0	-0.0350588	1	-0.382542	0.1861
A kinase (PRKA) anchor protein 1 [Source:MGI Symbol;Acc:MGI:104729]	Akap1	-0.91507	0	-1.26475	0	-0.304861	0.9612	-0.382513	0.1001
microtubule-associated protein 6 [Source:MGI Symbol;Acc:MGI:1201690]	Mtap6	-0.577244	0	-0.343994	0.0316	-0.522018	0.0001	-0.3825	0.4289
RIKEN cDNA 5730528L13 gene [Source:MGI Symbol;Acc:MGI:1913915]	5730528L13Rik	-0.472679	0	-1.01215	0	-0.595073	0	-0.382463	0.0014
pentatricopeptide repeat domain 3 [Source:MGI Symbol;Acc:MGI:1917206]	Ptcd3	-0.630939	0	-1.05815	0	-0.525503	0	-0.382425	0.0003
RIKEN cDNA 4933434E20 gene [Source:MGI Symbol;Acc:MGI:1914027]	4933434E20Rik	0.405655	0.1357	0.486519	0.0095	-0.142895	1	-0.382418	1
Sec31 homolog A (S. cerevisiae) [Source:MGI Symbol;Acc:MGI:1916412]	Sec31a	-0.324518	0.0863	0.312503	0.0375	-0.321573	0.0005	-0.382389	0.0003
nuclear factor I/B [Source:MGI Symbol;Acc:MGI:103188]	Nfib	-0.419283	0.0001	-0.74787	0	-0.266404	0.4704	-0.382365	0.023
prolyl endopeptidase-like [Source:MGI Symbol;Acc:MGI:2441932]	Prepl	-0.248967	0.9943	-0.730579	0	-0.387702	0	-0.382337	0.0012
RIKEN cDNA 2310007B03 gene [Source:MGI Symbol;Acc:MGI:1919124]	2310007B03Rik	-0.693418	0	-0.964278	0	-0.395726	0	-0.382258	0.991
structural maintenance of chromosomes 2 [Source:MGI Symbol;Acc:MGI:106067]	Smc2	-0.919569	0	-2.76422	0	-0.434785	0.0001	-0.382243	0.0175
abhydrolase domain containing 4 [Source:MGI Symbol;Acc:MGI:1915938]	Abhd4	1.69146	0	2.56022	0	0.0110376	1	-0.382072	0.2432
ras homolog gene family, member T1 [Source:MGI Symbol;Acc:MGI:1926078]	Rhot1	-0.320809	0.9992	-0.580636	0	-0.372761	0.0035	-0.381701	0.5322
plastin 1 (I-isoform) [Source:MGI Symbol;Acc:MGI:104809]	Pls1	0.64841	0	2.3561	0	-0.444288	0	-0.381534	0.0002
nitric oxide synthase 1, neuronal [Source:MGI Symbol;Acc:MGI:97360]	Nos1	-0.104552	1	0.714127	0	0.0580116	1	-0.381459	0.8886
meteorin, glial cell differentiation regulator [Source:MGI Symbol;Acc:MGI:1917333]	Metrn	-1.03499	0	-2.34802	0	-0.587379	0	-0.381325	0.0428
obscurin-like 1 [Source:MGI Symbol;Acc:MGI:2138628]	Obsl1	-0.589318	0.0001	-0.480482	0.0001	-0.65318	0	-0.381318	0.2083
breast cancer 2 [Source:MGI Symbol;Acc:MGI:109337]	Brca2	-1.27014	0	-3.26124	0	-0.398161	0.0004	-0.381184	0.3587
nucleoredoxin [Source:MGI Symbol;Acc:MGI:109331]	Nxn	-1.00143	0	-1.61418	0	-0.0961719	1	-0.381113	0.9999
prohibitin 2 [Source:MGI Symbol;Acc:MGI:102520]	Phb2	-0.511806	0	-0.734861	0	-0.268014	0.0507	-0.380268	0.0002
attractin [Source:MGI Symbol;Acc:MGI:1341628]	Atrn	0.108076	1	0.135285	1	-0.179809	1	-0.380063	0.0058
ATPase, Ca++ transporting, cardiac muscle, slow twitch 2 [Source:MGI Symbol;Acc:MGI:88110]	Atp2a2	-0.720738	0	-1.28161	0	-0.558011	0	-0.379795	0.2286
inositol monophosphatase domain containing 1 [Source:MGI Symbol;Acc:MGI:1915720]	Impad1	0.0492265	1	0.0193034	1	-0.396789	0	-0.379611	0.0609
mannosyl-oligosaccharide glucosidase [Source:MGI Symbol;Acc:MGI:1929872]	Mogs	-0.881771	0	-1.008	0	-0.194169	1	-0.379545	0.0809
dipeptidylpeptidase 9 [Source:MGI Symbol;Acc:MGI:2443967]	Dpp9	-0.295794	0.0169	0.147333	1	-0.277627	0.3623	-0.379481	0.1255
RAB1B, member RAS oncogene family [Source:MGI Symbol;Acc:MGI:1923558]	Rab1b	-0.0477291	1	-0.188545	1	-0.240641	1	-0.379466	0.8814
thrombospondin, type I, domain containing 4 [Source:MGI Symbol;Acc:MGI:2672033]	Thsd4	-0.219964	1	-0.359157	0.0491	-0.199868	0.9879	-0.379352	1
nuclear factor of activated T cells 5 [Source:MGI Symbol;Acc:MGI:1859333]	Nfat5	-0.53175	1	0.0645656	1	-0.123173	1	-0.37932	0.0232
AT hook containing transcription factor 1 [Source:MGI Symbol;Acc:MGI:1915033]	Ahctf1	-0.373054	0.0062	-1.09986	0	-0.266845	0.0134	-0.379278	0.0277
predicted gene 6768 [Source:MGI Symbol;Acc:MGI:3648259]	Gm6768	-0.212708	1	0.577025	0	-0.466552	0	-0.379239	0.0002
RIKEN cDNA 6030458C11 gene [Source:MGI Symbol;Acc:MGI:1925127]	6030458C11Rik	-0.264587	1	-0.383823	0.075	-0.102231	1	-0.378916	0.0736
RIKEN cDNA 1110031I02 gene [Source:MGI Symbol;Acc:MGI:1913429]	1110031I02Rik	-0.769499	0	-1.33015	0	-0.0992812	1	-0.378875	0.1741
zinc finger, AN1-type domain 1 [Source:MGI Symbol;Acc:MGI:1913611]	Zfand1	0.219723	0.9936	0.300241	0.0623	-0.466592	0	-0.378744	0.0067
epiregulin [Source:MGI Symbol;Acc:MGI:107508]	Ereg	-0.298442	0.9998	-0.750627	0	-0.555628	0	-0.378712	0.0012
DiGeorge syndrome critical region gene 8 [Source:MGI Symbol;Acc:MGI:2151114]	Dgcr8	-0.736708	0	-0.962846	0	-0.211313	0.9999	-0.378674	0.0015
protein kinase C, epsilon [Source:MGI Symbol;Acc:MGI:97599]	Prkce	0.34804	0.0253	1.29225	0	-0.520476	0.0484	-0.378515	0.4318
predicted gene 9725 [Source:MGI Symbol;Acc:MGI:3646552]	Gm9725	0.205242	1	0.189262	1	-0.202021	1	-0.378335	0.9443
cysteine sulfinic acid decarboxylase [Source:MGI Symbol;Acc:MGI:2180098]	Csad	0.587231	0	0.885543	0	-0.0885446	1	-0.378311	0.0199
ERGIC and golgi 3 [Source:MGI Symbol;Acc:MGI:1913616]	Ergic3	0.0625639	1	0.0609051	1	-0.0706635	1	-0.377742	0.9214
heat shock protein 8 [Source:MGI Symbol;Acc:MGI:105384]	Hspa8	-1.19039	0	-0.661298	0.0012	-0.289152	1	-0.377705	1
mitogen-activated protein kinase associated protein 1 [Source:MGI Symbol;Acc:MGI:2444554]	Mapkap1	0.523983	0.0001	0.849855	0	-0.191999	0.9999	-0.377681	0.0002
sterol-C4-methyl oxidase-like [Source:MGI Symbol;Acc:MGI:1913484]	Sc4mol	-0.945035	0	-1.41455	0	-0.343125	0.0032	-0.377471	0.0006
LIM and senescent cell antigen-like domains 1 [Source:MGI Symbol;Acc:MGI:1195263]	Lims1	0.377735	0.0029	0.895768	0	-0.472956	0.001	-0.377362	0.0073
gene trap ROSA 26, Philippe Soriano [Source:MGI Symbol;Acc:MGI:104735]	Gt(ROSA)26Sor	-0.269368	1	-0.964441	0	-0.294176	0.3634	-0.377298	0.9562
bifunctional apoptosis regulator [Source:MGI Symbol;Acc:MGI:1914368]	Bfar	-0.426627	0.0016	-0.153796	1	-0.255991	0.7866	-0.377263	0.0295
sphingosine kinase 1 [Source:MGI Symbol;Acc:MGI:1316649]	Sphk1	-0.900417	0	-1.01156	0	-0.393338	0	-0.377165	0
predicted gene 14308 [Source:MGI Symbol;Acc:MGI:3782921]	Gm14308	-0.139684	1	0.0823756	1	-0.282347	0.8325	-0.377068	1
G protein-coupled receptor 180 [Source:MGI Symbol;Acc:MGI:1930949]	Gpr180	-0.562344	0.018	-0.381019	0.0011	-0.216352	0.8631	-0.37689	0.4194
regulation of nuclear pre-mRNA domain containing 1B [Source:MGI Symbol;Acc:MGI:1917720]	Rprd1b	0.256516	0.8865	0.0933168	1	-0.307696	0.9956	-0.376682	0.0063
RIKEN cDNA 0610007P22 gene [Source:MGI Symbol;Acc:MGI:1915577]	0610007P22Rik	-0.426094	0.0053	-0.466371	0	-0.439399	0	-0.376674	0.0038
kinesin family member 11 [Source:MGI Symbol;Acc:MGI:1098231]	Kif11	-0.746841	0	-2.75804	0	-0.223093	1	-0.376489	0.0002
integrator complex subunit 3 [Source:MGI Symbol;Acc:MGI:2140050]	Ints3	0.03011	1	0.35417	0.12	-0.478507	0.0238	-0.376487	0.9418
transformation related protein 53 inducible nuclear protein 2 [Source:MGI Symbol;Acc:MGI:1915978]	Trp53inp2	1.13058	0	2.16832	0	0.111886	1	-0.376369	0.9144
apurinic/apyrimidinic endonuclease 1 [Source:MGI Symbol;Acc:MGI:88042]	Apex1	-1.73324	0	-2.43223	0	-0.310907	0.0508	-0.376319	0.0005
protein phosphatase 3, catalytic subunit, gamma isoform [Source:MGI Symbol;Acc:MGI:107162]	Ppp3cc	-0.170707	1	-0.381791	0.0459	-0.1614	1	-0.376302	0.0145
calcium channel flower domain containing 1 [Source:MGI Symbol;Acc:MGI:1924317]	Cacfd1	-0.308821	0.6375	0.0803302	1	-0.0503276	1	-0.376096	0.0505
GTPase, very large interferon inducible 1 [Source:MGI Symbol;Acc:MGI:1921808]	Gvin1	0.379865	0.0009	2.69484	0	0.248195	1	-0.375955	1
secreted Ly6/Plaur domain containing 1 [Source:MGI Symbol;Acc:MGI:1930923]	Slurp1	-0.156896	1	-0.498625	0	-0.0274411	1	-0.37585	0.0046
SMAD family member 5 [Source:MGI Symbol;Acc:MGI:1328787]	Smad5	-0.0394408	1	-0.08982	1	-0.334202	0.062	-0.37528	0.047
insulin-like growth factor 2 mRNA binding protein 1 [Source:MGI Symbol;Acc:MGI:1890357]	Igf2bp1	0.422244	0.3897	1.12926	0	-0.0359889	1	-0.375094	0.0653
bone morphogenetic protein 1 [Source:MGI Symbol;Acc:MGI:88176]	Bmp1	0.203414	1	0.56809	0	-0.0880186	1	-0.374741	0.2764
centrin 2 [Source:MGI Symbol;Acc:MGI:1347085]	Cetn2	-0.0439523	1	-0.914888	0	-0.288248	0.0041	-0.374731	0.0079
lymphocyte antigen 6 complex, locus D [Source:MGI Symbol;Acc:MGI:96881]	Ly6d	-0.0176507	1	-0.14957	1	-0.101087	1	-0.374617	0.1279
MAP kinase-activated protein kinase 5 [Source:MGI Symbol;Acc:MGI:1333110]	Mapkapk5	0.0722979	1	0.0199011	1	-0.279594	0.036	-0.374593	0.0111
zinc finger protein 933 [Source:MGI Symbol;Acc:MGI:1922865]	Zfp933	0.103424	1	0.302699	0.6506	-0.00453285	1	-0.374531	0.8117
trafficking protein particle complex 6B [Source:MGI Symbol;Acc:MGI:1925482]	Trappc6b	0.223398	1	0.457321	0	-0.399428	0	-0.37411	0.4161
plexin B1 [Source:MGI Symbol;Acc:MGI:2154238]	Plxnb1	-0.321719	1	-0.29778	0.0676	-0.0605267	1	-0.373892	0.0061
plakophilin 1 [Source:MGI Symbol;Acc:MGI:1328359]	Pkp1	-0.457399	0	-0.347812	0.0018	-0.437152	0	-0.373882	0.0052
procollagen-proline, 2-oxoglutarate 4-dioxygenase (proline 4-hydroxylase), alpha 1 polypeptide [Source:MGI Symbol;Acc:MGI:97463]	P4ha1	-0.551996	0	-1.11474	0	-0.0630987	1	-0.373871	0.0008
ras homolog gene family, member B [Source:MGI Symbol;Acc:MGI:107949]	Rhob	-1.01505	0	-0.0502709	1	-0.597867	0	-0.373867	0.0147
hippocalcin [Source:MGI Symbol;Acc:MGI:1336200]	Hpca	-0.173227	1	-0.547411	0.1015	-0.115985	1	-0.373864	0.0002
serine/arginine-rich splicing factor 7 [Source:MGI Symbol;Acc:MGI:1926232]	Srsf7	-1.548	0	-2.32385	0	-0.543902	0	-0.373462	0.3446
EP300 interacting inhibitor of differentiation 1 [Source:MGI Symbol;Acc:MGI:1889651]	Eid1	-0.170045	1	-0.231324	0.9719	-0.160647	1	-0.373447	0.0688
Hbs1-like (S. cerevisiae) [Source:MGI Symbol;Acc:MGI:1891704]	Hbs1l	0.174368	1	-0.492647	0	-0.314625	0.008	-0.373303	0.0668
FAST kinase domains 2 [Source:MGI Symbol;Acc:MGI:1922869]	Fastkd2	-0.857325	0	-1.11545	0	-0.415507	0	-0.373094	0.0411
notchless homolog 1 (Drosophila) [Source:MGI Symbol;Acc:MGI:2429770]	Nle1	-0.106298	1	-0.47289	0.0015	-0.387049	0.0006	-0.373088	0.2811
protein kinase C substrate 80K-H [Source:MGI Symbol;Acc:MGI:107877]	Prkcsh	-0.058512	1	-0.0743864	1	-0.109069	1	-0.372995	0.515
Sin3-associated polypeptide 18 [Source:MGI Symbol;Acc:MGI:1277978]	Sap18	-0.083823	1	-0.412506	0.0047	-0.560215	0	-0.372675	0.1081
tetraspanin 31 [Source:MGI Symbol;Acc:MGI:1914375]	Tspan31	-0.0200083	1	-0.0643532	1	-0.243018	0.7116	-0.372429	0.9994
drebrin-like [Source:MGI Symbol;Acc:MGI:700006]	Dbnl	-0.443005	0.004	-0.247253	1	-0.251765	1	-0.372399	0.0091
even skipped homeotic gene 2 homolog [Source:MGI Symbol;Acc:MGI:95462]	Evx2	0.0356239	1	0.120896	1	-0.227373	1	-0.372246	0.8436
Rpgrip1-like [Source:MGI Symbol;Acc:MGI:1920563]	Rpgrip1l	1.27508	0	1.28625	0	-0.160743	1	-0.372162	0.0235
histone deacetylase 8 [Source:MGI Symbol;Acc:MGI:1917565]	Hdac8	0.239496	0.9996	0.377301	0.0328	0.0656964	1	-0.372089	1
methionine aminopeptidase 2 [Source:MGI Symbol;Acc:MGI:1929701]	Metap2	-0.0340938	1	-0.148735	1	-0.283917	1	-0.37207	0.0068
transmembrane protein 48 [Source:MGI Symbol;Acc:MGI:1920037]	Tmem48	-1.1416	0	-3.1401	0	-0.463404	0	-0.371973	0.1461
VPS33B interacting protein, apical-basolateral polarity regulator, spe-39 homolog [Source:MGI Symbol;Acc:MGI:2144805]	Vipas39	0.159978	1	1.00112	0	-0.137799	1	-0.371799	0.0015
zinc finger protein 763 [Source:MGI Symbol;Acc:MGI:1920701]	Zfp763	-0.159969	1	-1.02844	0	-0.0275411	1	-0.371648	0.0267
glutaminase [Source:MGI Symbol;Acc:MGI:95752]	Gls	0.304102	0.9895	0.199135	1	-0.0806752	1	-0.371611	0.8769
deleted in primary ciliary dyskinesia [Source:MGI Symbol;Acc:MGI:1924407]	Dpcd	-0.131813	1	-0.209685	1	-0.295185	0.1634	-0.371323	0.0002
small nuclear RNA activating complex, polypeptide 5 [Source:MGI Symbol;Acc:MGI:1914282]	Snapc5	0.77586	0	0.870211	0	-0.0941624	1	-0.371228	0.0177
heat shock protein 1 (chaperonin) [Source:MGI Symbol;Acc:MGI:96242]	Hspd1	-0.882289	0	-2.50057	0	-0.405683	0.0002	-0.371044	0.3525
mitochondrial ribosomal protein L3 [Source:MGI Symbol;Acc:MGI:2137204]	Mrpl3	-0.468168	0	-0.604262	0	-0.332742	0.0075	-0.370803	0.0005
WD repeat and SOCS box-containing 2 [Source:MGI Symbol;Acc:MGI:2144041]	Wsb2	-0.716429	0	-0.841487	0	-0.262715	1	-0.370683	0.7048
procollagen-lysine, 2-oxoglutarate 5-dioxygenase 3 [Source:MGI Symbol;Acc:MGI:1347008]	Plod3	-0.228128	1	-0.438739	0	-0.167129	1	-0.370603	0.0218
angio-associated migratory protein [Source:MGI Symbol;Acc:MGI:107809]	Aamp	0.0802074	1	0.407766	0.0102	-0.162134	1	-0.370527	0.0693
syntaxin 17 [Source:MGI Symbol;Acc:MGI:1914977]	Stx17	0.220999	1	-0.0610804	1	-0.435751	0.0014	-0.370329	0.9627
endoplasmic reticulum metallopeptidase 1 [Source:MGI Symbol;Acc:MGI:106250]	Ermp1	-0.752447	0	-1.605	0	-0.455701	0	-0.370186	0.0724
transmembrane protein 5 [Source:MGI Symbol;Acc:MGI:2384919]	Tmem5	0.361892	0.0003	0.134602	1	-0.53323	0	-0.370174	0.0027
RIKEN cDNA 1810058I24 gene [Source:MGI Symbol;Acc:MGI:1914955]	1810058I24Rik	0.42826	0.0308	0.462775	0.018	-0.315948	1	-0.370077	0.9899
guanylate-binding protein 8 [Source:MGI Symbol;Acc:MGI:1923324]	Gbp8	0.29125	0.9883	1.57316	0	-0.0108683	1	-0.370038	0.6061
RIKEN cDNA 1700028P14 gene [Source:MGI Symbol;Acc:MGI:1914733]	1700028P14Rik	0.110083	1	-0.192019	1	-0.642302	0.0942	-0.370031	1
thioredoxin domain containing 15 [Source:MGI Symbol;Acc:MGI:1916922]	Txndc15	0.133393	1	0.372194	0.0002	-0.25896	0.0262	-0.369889	0.1052
glucocorticoid induced transcript 1 [Source:MGI Symbol;Acc:MGI:2179717]	Glcci1	1.07043	0	1.1485	0	-0.127058	1	-0.369719	0.1652
guanine nucleotide binding protein, alpha q polypeptide [Source:MGI Symbol;Acc:MGI:95776]	Gnaq	0.0339903	1	-0.00993099	1	-0.10088	1	-0.369529	0.0006
predicted gene 12725 [Source:MGI Symbol;Acc:MGI:3649750]	Gm12725	-0.748129	0	-2.36904	0	-0.449621	0	-0.369403	0.0002
isovaleryl coenzyme A dehydrogenase [Source:MGI Symbol;Acc:MGI:1929242]	Ivd	-0.694228	0	-0.380446	0.0909	0.00850123	1	-0.369373	1
DENN/MADD domain containing 1A [Source:MGI Symbol;Acc:MGI:2442794]	Dennd1a	0.25876	0.9997	0.248571	1	-0.479545	0.0007	-0.369104	0.2233
tubulin tyrosine ligase-like family, member 5 [Source:MGI Symbol;Acc:MGI:2443657]	Ttll5	0.102698	1	0.543229	0	-0.133465	1	-0.369084	0.9246
eukaryotic translation initiation factor 4 gamma, 3 [Source:MGI Symbol;Acc:MGI:1923935]	Eif4g3	0.0324253	1	0.369338	0.5518	-0.103259	1	-0.369017	0.2558
REST corepressor 2 [Source:MGI Symbol;Acc:MGI:1859854]	Rcor2	-1.57943	0	-2.08	0	-0.486588	0	-0.368557	0.2066
leucine rich repeat containing 24 [Source:MGI Symbol;Acc:MGI:3605040]	Lrrc24	-0.314187	0.5316	-0.628223	0	-0.0769223	1	-0.368408	0.0397
limb region 1 [Source:MGI Symbol;Acc:MGI:1861746]	Lmbr1	-0.302901	0.254	0.078924	1	-0.0944596	1	-0.368233	0.0003
cell division cycle 25C [Source:MGI Symbol;Acc:MGI:88350]	Cdc25c	-0.281474	0.9787	-2.97396	0	-0.45555	0	-0.368108	0.0016
transcription factor 7 like 1 (T cell specific, HMG box) [Source:MGI Symbol;Acc:MGI:1202876]	Tcf7l1	-0.519853	0.0001	-0.790764	0	-0.162988	1	-0.368032	1
RIKEN cDNA 9030617O03 gene [Source:MGI Symbol;Acc:MGI:2444813]	9030617O03Rik	0.406177	0.014	0.0701695	1	-0.271416	0.5909	-0.367959	0.9374
	AC122546.1	0.0427984	1	-0.0662491	1	-0.231495	1	-0.367922	1
nuclear casein kinase and cyclin-dependent kinase substrate 1 [Source:MGI Symbol;Acc:MGI:1934811]	Nucks1	-0.879579	0	-2.44984	0	-0.343074	0.0158	-0.36787	0.9999
dexamethasone-induced transcript [Source:MGI Symbol;Acc:MGI:1926236]	Dexi	-0.168027	1	-0.120813	1	-0.171258	1	-0.36786	0.0802
cytochrome C oxidase assembly factor 5 [Source:MGI Symbol;Acc:MGI:1923428]	Coa5	-0.0662491	1	-0.0515158	1	-0.589926	0	-0.367821	0.0016
uveal autoantigen with coiled-coil domains and ankyrin repeats [Source:MGI Symbol;Acc:MGI:1919815]	Uaca	0.664983	0	0.784261	0	-0.0926463	1	-0.367814	0.0227
solute carrier family 35, member B2 [Source:MGI Symbol;Acc:MGI:1921086]	Slc35b2	-0.45449	0.0001	-0.439189	0.0002	-0.208211	1	-0.367762	0.0106
molybdenum cofactor synthesis 2 [Source:MGI Symbol;Acc:MGI:1336894]	Mocs2	0.519824	0	1.15228	0	-0.405509	0	-0.367672	0.054
WD repeat domain 41 [Source:MGI Symbol;Acc:MGI:2445123]	Wdr41	-0.342173	0.0285	-0.318756	0.0502	-0.310128	0.0057	-0.367315	0.9614
	AC207128.2	-0.253517	1	-0.515501	0.0538	-0.0723811	1	-0.367272	1
adenosine deaminase, tRNA-specific 3 [Source:MGI Symbol;Acc:MGI:1924344]	Adat3	-0.417617	0.0782	-0.507035	0.0002	-0.286976	0.9884	-0.367188	0.0081
ancient ubiquitous protein 1 [Source:MGI Symbol;Acc:MGI:107789]	Aup1	-0.222323	1	-0.0703771	1	-0.143408	1	-0.367157	0.6068
CDK5 regulatory subunit associated protein 2 [Source:MGI Symbol;Acc:MGI:2384875]	Cdk5rap2	-0.0924478	1	0.22567	0.9533	-0.337322	0.9841	-0.366915	0.0267
phosphohistidine phosphatase 1 [Source:MGI Symbol;Acc:MGI:1922704]	Phpt1	0.145964	1	-0.387319	0.0001	-0.256457	1	-0.366671	1
intraflagellar transport 20 [Source:MGI Symbol;Acc:MGI:1915585]	Ift20	0.530251	0.0399	1.46037	0	-0.166465	1	-0.366599	0.495
ribosome binding protein 1 [Source:MGI Symbol;Acc:MGI:1932395]	Rrbp1	-0.268547	0.8553	-0.474731	0	-0.248469	1	-0.36648	0.0003
aldo-keto reductase family 1, member C12 [Source:MGI Symbol;Acc:MGI:1351661]	Akr1c12	1.56642	0	2.21786	0	-0.0419042	1	-0.366193	0.9993
excision repair cross-complementing rodent repair deficiency, complementation group 4 [Source:MGI Symbol;Acc:MGI:1354163]	Ercc4	-0.205495	1	-0.167987	1	-0.306527	0.2362	-0.366069	0.0046
calmodulin regulated spectrin-associated protein family, member 3 [Source:MGI Symbol;Acc:MGI:1916947]	Camsap3	0.173869	1	0.611966	0	-0.0268928	1	-0.365816	0.2816
integrator complex subunit 5 [Source:MGI Symbol;Acc:MGI:1923578]	Ints5	-0.735946	0	-1.33412	0	-0.357437	0.0001	-0.365462	0.0234
mitogen-activated protein kinase 1 interacting protein 1-like [Source:MGI Symbol;Acc:MGI:2444022]	Mapk1ip1l	-0.183032	1	-0.319168	0.0109	-0.385347	0.0011	-0.365358	0.0012
CTD (carboxy-terminal domain, RNA polymerase II, polypeptide A) small phosphatase-like [Source:MGI Symbol;Acc:MGI:1916524]	Ctdspl	-0.118265	1	0.205893	1	-0.103745	1	-0.365206	0.0066
male-specific lethal 1 homolog (Drosophila) [Source:MGI Symbol;Acc:MGI:1921276]	Msl1	0.180848	1	0.680324	0	-0.023239	1	-0.364972	0.9535
cytochrome P450, family 20, subfamily a, polypeptide 1 [Source:MGI Symbol;Acc:MGI:1925201]	Cyp20a1	-0.505597	0	-1.24312	0	-0.254035	0.3307	-0.364838	0.031
uncharacterized protein LOC100041979 [Source:RefSeq peptide;Acc:NP_001156382]	ZFP936	-0.601536	0	-1.15707	0	-0.357358	0.0833	-0.364517	0.2976
ESF1, nucleolar pre-rRNA processing protein, homolog (S. cerevisiae) [Source:MGI Symbol;Acc:MGI:1913830]	Esf1	-0.618238	0	-0.890142	0	-0.562329	0	-0.36442	0.025
ubiquitin-conjugating enzyme E2I [Source:MGI Symbol;Acc:MGI:107365]	Ube2i	-0.264741	0.9999	-0.466564	0.0001	-0.147776	1	-0.364376	0.0035
deafness, autosomal dominant 5 (human) [Source:MGI Symbol;Acc:MGI:1889850]	Dfna5	1.62324	0	2.65115	0	-0.161437	1	-0.364221	1
nuclear factor of kappa light polypeptide gene enhancer in B cells inhibitor, epsilon [Source:MGI Symbol;Acc:MGI:1194908]	Nfkbie	0.823268	0	1.86808	0	-0.6453	0	-0.364197	0.0019
breast cancer 1 [Source:MGI Symbol;Acc:MGI:104537]	Brca1	-0.765455	0	-2.14916	0	-0.295109	0.8754	-0.36416	0.007
choline phosphotransferase 1 [Source:MGI Symbol;Acc:MGI:2384841]	Chpt1	-0.123761	1	-0.0904435	1	-0.220097	1	-0.363683	0.0426
BCL2 modifying factor [Source:MGI Symbol;Acc:MGI:2176433]	Bmf	0.712006	0	1.14005	0	-0.0191792	1	-0.363581	0.7311
phosphoglycerate mutase 1 [Source:MGI Symbol;Acc:MGI:97552]	Pgam1	-1.26301	0	-1.73613	0	-0.0825789	1	-0.363278	0.0014
ECSIT homolog (Drosophila) [Source:MGI Symbol;Acc:MGI:1349469]	Ecsit	-0.917466	0	-0.924843	0	-0.414691	0	-0.363204	0.0088
R3H domain containing 1 [Source:MGI Symbol;Acc:MGI:2448514]	R3hdm1	-0.154397	1	-0.0658398	1	-0.554949	0	-0.36316	0.0198
twist homolog 1 (Drosophila) [Source:MGI Symbol;Acc:MGI:98872]	Twist1	0.147489	1	-0.169722	1	-0.39378	0.3078	-0.363154	0.0015
RIKEN cDNA 5031439G07 gene [Source:MGI Symbol;Acc:MGI:2444899]	5031439G07Rik	-0.776081	0	-0.904286	0	-0.158408	1	-0.363024	0.1008
F-box protein 42 [Source:MGI Symbol;Acc:MGI:1924992]	Fbxo42	-0.242736	1	-0.251142	0.4135	-0.159375	1	-0.362481	0.0022
histone cell cycle regulation defective homolog A (S. cerevisiae) [Source:MGI Symbol;Acc:MGI:99430]	Hira	-0.318455	0.559	-0.488868	0	-0.377767	0.0001	-0.362475	0.0003
aprataxin and PNKP like factor [Source:MGI Symbol;Acc:MGI:1919353]	Aplf	1.74936	0	1.62685	0	-0.118515	1	-0.362369	0.0234
PR domain containing 4 [Source:MGI Symbol;Acc:MGI:1920093]	Prdm4	-0.352569	0.0026	-0.24985	0.996	-0.383644	0	-0.362282	0.0006
MAX dimerization protein 1 [Source:MGI Symbol;Acc:MGI:96908]	Mxd1	1.99708	0	3.48147	0	0.102846	1	-0.362267	0.9999
RIKEN cDNA 1700025G04 gene [Source:MGI Symbol;Acc:MGI:1916649]	1700025G04Rik	0.244583	0.9927	1.36368	0	-0.0550381	1	-0.361935	0.0003
inhibitor of Bruton agammaglobulinemia tyrosine kinase [Source:MGI Symbol;Acc:MGI:1918677]	Ibtk	1.10472	0	1.38113	0	-0.626424	0	-0.361909	1
leucine carboxyl methyltransferase 1 [Source:MGI Symbol;Acc:MGI:1353593]	Lcmt1	0.0495332	1	0.206031	0.9928	-0.284665	0.2322	-0.361909	0.0175
alpha tubulin acetyltransferase 1 [Source:MGI Symbol;Acc:MGI:1913869]	Atat1	0.662461	0	1.15598	0	-0.150539	1	-0.361856	1
lysine (K)-specific demethylase 3A [Source:MGI Symbol;Acc:MGI:98847]	Kdm3a	0.384271	0.0028	0.714742	0	-0.041236	1	-0.361848	0.0425
DALR anticodon binding domain containing 3 [Source:MGI Symbol;Acc:MGI:1915039]	Dalrd3	-0.230768	1	-0.482779	0	-0.136658	1	-0.361833	0.0287
solute carrier family 12, member 2 [Source:MGI Symbol;Acc:MGI:101924]	Slc12a2	0.653592	0	0.257312	0.8368	-0.336695	0.0104	-0.361804	0.4316
UTP6, small subunit (SSU) processome component, homolog (yeast) [Source:MGI Symbol;Acc:MGI:2445193]	Utp6	-0.0395165	1	-0.117963	1	-0.447243	0.0004	-0.361617	0.0206
predicted gene 6292 [Source:MGI Symbol;Acc:MGI:3648806]	Gm6292	-0.00819901	1	-0.539704	0	-0.305903	0.1273	-0.361579	0.0353
membrane magnesium transporter 2 [Source:MGI Symbol;Acc:MGI:2448491]	Mmgt2	-0.136128	1	-0.184725	1	-0.357441	0.0002	-0.361529	0.0282
RIKEN cDNA 4933434E20 gene [Source:MGI Symbol;Acc:MGI:1914027]	4933434E20Rik	0.547746	0.0002	0.844321	0	0.0300535	1	-0.36142	0.1267
mitogen-activated protein kinase 12 [Source:MGI Symbol;Acc:MGI:1353438]	Mapk12	-0.598787	0	-0.805721	0	-0.262765	0.2993	-0.361415	0.001
ADP-ribosylation factor-like 8B [Source:MGI Symbol;Acc:MGI:1914416]	Arl8b	-0.313669	0.329	-0.232135	1	-0.284672	1	-0.36139	0.0349
predicted gene 16536 [Source:MGI Symbol;Acc:MGI:4414956]	Gm16536	0.551107	0	1.07377	0	-0.676411	1	-0.361133	0.5085
centrosomal protein 97 [Source:MGI Symbol;Acc:MGI:1921451]	Cep97	0.267344	0.9484	0.317339	0.0902	-0.118794	1	-0.36107	0.0096
RIKEN cDNA 1700010L04 gene [Source:MGI Symbol;Acc:MGI:1916583]	1700010L04Rik	-0.0812917	1	-0.252231	0.9977	-0.242238	1	-0.360927	0.0019
high mobility group box 3 [Source:MGI Symbol;Acc:MGI:1098219]	Hmgb3	-0.956412	0	-1.65401	0	-0.294356	0.0045	-0.360901	0.0039
jerky [Source:MGI Symbol;Acc:MGI:106214]	Jrk	-0.553792	0	-0.549481	0	-0.103491	1	-0.360831	0.1286
RIKEN cDNA 2700081O15 gene [Source:MGI Symbol;Acc:MGI:1919667]	2700081O15Rik	-0.149948	1	-0.23322	0.8736	-0.185502	1	-0.360818	0.0503
polyadenylate binding protein-interacting protein 1 [Source:MGI Symbol;Acc:MGI:2384993]	Paip1	0.0103645	1	0.0618315	1	-0.318	0.2449	-0.360725	0.7394
ADP-ribosylation factor 3 [Source:MGI Symbol;Acc:MGI:99432]	Arf3	-0.176988	1	0.470126	0	-0.330222	0.7487	-0.360709	0.0557
solute carrier family 35 (CMP-sialic acid transporter), member 1 [Source:MGI Symbol;Acc:MGI:1345622]	Slc35a1	0.0731073	1	0.303693	0.8532	-0.195889	1	-0.360616	0.0216
guanine nucleotide binding protein (G protein), gamma 7 [Source:MGI Symbol;Acc:MGI:95787]	Gng7	-0.106945	1	0.140543	1	-0.0636881	1	-0.36046	0.1602
ubiquitin protein ligase E3 component n-recognin 1 [Source:MGI Symbol;Acc:MGI:1277977]	Ubr1	0.766968	0	0.893704	0	-0.257659	0.1572	-0.360396	0.0002
RIKEN cDNA 1190002N15 gene [Source:MGI Symbol;Acc:MGI:1916111]	1190002N15Rik	-1.20601	0	-1.94299	0	-0.444863	0.0071	-0.360396	0.0518
olfactory receptor 518 [Source:MGI Symbol;Acc:MGI:3030352]	Olfr518	-0.313886	0.977	-1.00802	0	-0.0460956	1	-0.36039	0.9994
ring finger protein, LIM domain interacting [Source:MGI Symbol;Acc:MGI:1342291]	Rlim	-0.138947	1	-0.0475978	1	-0.376538	0.0005	-0.360357	0.8219
drebrin-like [Source:MGI Symbol;Acc:MGI:700006]	Dbnl	-0.441009	0.7727	-0.270156	0.9998	-0.104759	1	-0.360231	1
catenin (cadherin associated protein), alpha-like 1 [Source:MGI Symbol;Acc:MGI:1859649]	Ctnnal1	-0.887537	0	-1.25439	0	-0.415286	0.0001	-0.360018	0.0541
candidate tumor suppressor in ovarian cancer 2 [Source:MGI Symbol;Acc:MGI:2179725]	Ovca2	-0.136962	1	-0.125419	1	-0.266581	0.0529	-0.360008	0.0783
glutathione reductase [Source:MGI Symbol;Acc:MGI:95804]	Gsr	-0.698099	0	-1.04737	0	-0.241775	1	-0.359907	0.0037
LMBR1 domain containing 1 [Source:MGI Symbol;Acc:MGI:1915671]	Lmbrd1	0.501587	0.0024	0.788335	0	-0.224437	0.9981	-0.359751	0.0093
ring finger protein 5 [Source:MGI Symbol;Acc:MGI:1860076]	Rnf5	0.101731	1	0.00115369	1	-0.18595	0.9997	-0.359738	0.1488
complement component (3b/4b) receptor 1-like [Source:MGI Symbol;Acc:MGI:88513]	Cr1l	0.844932	0	0.65362	0	-0.30061	0.0104	-0.359549	0.1976
DEAD (Asp-Glu-Ala-Asp) box polypeptide 1 [Source:MGI Symbol;Acc:MGI:2144727]	Ddx1	-0.166937	1	-0.41893	0.0743	-0.174794	1	-0.359536	0.1946
von Hippel-Lindau tumor suppressor [Source:MGI Symbol;Acc:MGI:103223]	Vhl	-0.245605	1	0.0751629	1	-0.262941	0.9957	-0.359522	0.0006
ubiquitin-conjugating enzyme E2Q (putative) 2 [Source:MGI Symbol;Acc:MGI:2388672]	Ube2q2	0.165507	1	-0.357158	0.0119	0.044506	1	-0.359485	0.0076
DEK oncogene (DNA binding) [Source:MGI Symbol;Acc:MGI:1926209]	Dek	-0.692506	0	-2.61576	0	-0.167509	1	-0.359403	0.0614
[truncated: 35,933 more rows]

## Sheet: Suppl Table 3  Fig 8A
Supplemental Table 3 (used for Fig 8A)
382 elements included exclusively in "F3A3 8h":	3718 common elements in "F3A3 8h" and "F3A3 16h":	3072 elements included exclusively in "F3A3 16h":
Mfap3l	Ctgf	Oasl2
Dock4	Cited2	Ifit1
Maf	Rab3b	Rtp4
Gnb4	Mmp13	Ifit3
Fam107b	Edn1	Apol9b
Aspa	5031410I06Rik	I830012O16Rik
D830044D21Rik	Gadd45a	Ccl9
Klra2	Sgk1	Anxa8
Egr2	Ifnk	Oas2
Lyn	Gm7361	Hist1h1c
Tmem70	Speer4b	Trim30a
Mtmr10	Gm15298	S100a7a
Tmco6	Slc7a7	Repin1
Eps8l3	Ccpg1	Oas1a
Gm13416	Crebl2	RP23-404J7.3
Cyp26c1	Gm11815	Oas1b
Fut8	Nfe2l3	Csdc2
Txk	Ptgs2	Igtp
Wdsub1	1110018J18Rik	Rragb
Fam193b	Trp53inp1	Isg15
Wwp1	Cpeb2	Apol9a
Nipbl	Tcp11l2	Gvin1
AL935177.3	Il17rd	Muc16
Sik3	Ptpn22	Trim30d
Nek7	3110057O12Rik	Irgm2
Accs	Fam110c	Parp9
Uhrf2	Pink1	Irf7
Inpp1	4930519F16Rik	Irgm1
Btc	Fn1	Trim25
Dsel	Abcb1a	Aloxe3
Fam102b	Vwa5a	Gm1966
Map3k5	Efhd1	Uchl1
C230081A13Rik	Sash1	Ifih1
Rasgef1b	Myo16	Irf9
Spice1	Gm15145	Dusp4
Zfp959	Cytip	Oas3
Lrwd1	Tmem140	Oas1c
Sdc4	Mgp	Ifi27l1
Slc10a2	Gjc1	Gbp8
Ift80	Cxcl3	Ifi35
Ddb2	Sema7a	Herc6
Crbn	Rdh10	Oas1f
A930018M24Rik	Sesn3	Ccl6
Armcx5	Hbegf	Ranbp2
Fam69a	Foxp1	Sbsn
Nptn	Nyap1	Vmn1r201
Btbd7	Ank	9130409I23Rik
Cdon	Erbb3	Crygn
Mfsd7a	Pla2g16	BC006779
Gm15731	Zfand2a	Gstt4
Mterfd3	Rnase4	Sec14l4
1700025K23Rik	Sesn1	Eif2ak2
Rps6ka5	Chac1	Gbp4
Gnpnat1	Sec23a	Cmpk2
Top2b	Calcb	Tor3a
Vrk3	Tmem158	Atp6v0a2
Tle1	Cd14	Pof1b
Gpr124	Rfk	Gm3053
Slc30a9	Vgll3	Lamp2
Kctd18	Galntl2	Scpep1
Mrpl34	Slc12a1	Zc3hav1
Nme7	Cyp4v3	Bnip3l
Pigb	Pik3ip1	Npc2
Casp6	Etl4	Gbp9
Rpia	Slc15a2	Aif1l
Ncald	Serinc5	Fth1
Otud1	Scel	Nrg1
Sh3bp5l	Gm20618	Ddx60
1110037F02Rik	4933426M11Rik	Casc1
Stk24	Card6	Acad10
Clcn3	Slc40a1	Ccl5
Mgst2	Tlr2	Gadd45b
Zfp420	P2rx7	Rsad2
Slc12a2	2310002L13Rik	Ide
Hmgn5	Calcoco1	Uba7
Rbm47	Slc17a5	Itgam
Xpr1	Kank1	Zfp36l1
Lancl2	Mxd4	Pmaip1
Arntl	Ttc5	Stat1
Ptplb	Tktl1	Map1lc3a
Ppp4r1l-ps	Jhdm1d	Adar
Mrps31	BC022687	Cartpt
Fam65c	Rab11fip1	Pdzk1ip1
Mtfr1	Mustn1	Nckap1l
Tjp2	Man1a	Ifi44
Dlgap1	Ube2h	Mvp
Lmx1a	Map1lc3b	Trav13-2
Them4	Kank3	Sumf1
Ovol2	Hspb1	Tcstv1
Pot1a	2410066E13Rik	Nfkbia
Phkb	Sh3yl1	Krtap4-13
Zfp69	Ppp1r15a	Pold4
Mtm1	Map3k8	Parp3
Stard13	Ccdc66	Mylk2
Stag2	Neat1	2310002J15Rik
A230046K03Rik	Fos	D6Wsu116e
Mzt2	Wipi1	Gbp7
Ppap2a	Cwh43	Gm14556
Otx1	AC163677.1	Tgtp2
Pxdc1	Ppm1k	Gdnf
Vamp4	Ctla2b	Pdlim2
Gm17108	Fbxo30	Trim21
Rpp14	Ctla2a	Gm7582
Nfkb1	AC161460.3	9930023K05Rik
Serpinb9	Mxd1	Zc3h12a
Phyhd1	Stradb	Slc20a1
Hoxa5	Gbp5	Fuca1
Haus4	Pdk4	Cst6
Sap30l	Swt1	2310045N01Rik
Kif7	Sdcbp2	Ctsd
Slc1a4	D230025D16Rik	1110018G07Rik
Trp53i11	Mxi1	Vldlr
Zfp141	Kctd12b	A330021E22Rik
Leprot	S100a13	Trim30b
Fam167a	Ahr	Golga4
Papolg	Ifi202b	Bcap31
Ino80c	Rusc2	Aldh2
Pank1	Fosl2	Nbl1
Taf8	Pcmtd2	Olfr1474
Atl1	Suds3	Mccc2
Prpf39	4930486L24Rik	Shisa5
Cyp4f41-ps	Gm5918	Cabp1
2700049A03Rik	Pdgfra	Tdeanc2
Vps54	A830005F24Rik	Gpr107
Wdfy3	Speer4a	Dhx58
Rdh5	Tmem50a	2210408F21Rik
Gata3	Atg2a	Cdadc1
Tgfb3	Ccrl2	Glrp1
Tmod3	Ip6k1	Atf7ip
Pip5k1c	Fez2	Spryd7
Arap2	Ifi204	Rnasek
Olfr22-ps1	Plekhm1	4931406C07Rik
Tmem177	Fbxo32	Acads
Zfp330	Myo6	Snapc1
Ttc39b	Mtus1	Fam126b
AC120217.1	4933431E20Rik	2810474O19Rik
Rpf1	Angpt2	Desi1
Gmpr	Egr1	Lama3
Med24	Pde4b	Ube2l6
Thoc7	4930420K17Rik	Sync
Fam117b	Acadsb	Myof
Ppp2r5a	BC031353	Abhd3
Mdm4	Tmc4	Csf3
Taf1b	Cyp39a1	Gm13270
Tle4	Heg1	Eif2ak3
Tbc1d15	Nbr1	Abhd2
Lrrc49	Amot	1700025G04Rik
Pdcl3	Rnf144b	Fggy
Paqr5	Sgms2	Rbm3
Rad17	Slc25a27	Gm5152
Ppef1	Scin	Dnahc10
Zfp637	Pam	Dapp1
Lpcat2	Nipal1	Zfp830
Osgepl1	Bbip1	Dedd2
Dnalc1	Clu	Errfi1
Nadkd1	Aplf	Serp2
3110067C02Rik	Fgd6	Pcnx
Bcl10	Tmprss11e	Slco1c1
Spnb3	AC239677.2	Cul7
Dnm1l	Dram2	Ssh1
Olfr551	Angptl4	Phf1
Kcnab1	4833420G17Rik	Tchp
Ropn1l	AI607873	Clec2d
Smad5	Dnajc12	Stx11
Nudt1	Fbxo6	Ctage5
4930430F08Rik	Apbb1	4930579G22Rik
Chst9	Pdcd4	Itpkc
Iqsec1	Ndrg1	Plekhb2
Bdh1	Tlr4	S100a6
Nom1	Rasal2	Myl12a
Laptm4b	BC094916	Tmbim4
Anks1	Cxcl1	Rnf19b
Havcr1	Acad12	Setd7
Dnajc11	Rb1	AC126250.1
Phtf2	Etfdh	Fbxw17
Rilpl1	Srgn	Prkce
2310039H08Rik	E130102H24Rik	Mfsd11
Slc12a4	Abhd4	Chst12
Mcfd2	Chic2	Dera
1810026J23Rik	Pdgfb	Sgpl1
Ptpn11	Atp6v0a4	Plxna4
Scrib	Hadhb	Tsta3
Lama5	Porcn	Phyh
Sh3bp1	Ugcg	Mia2
Trak1	Ypel3	AC154660.1
Cdk18	Casz1	Ube2g2
Alg2	Slc35d2	Plce1
A730090H04Rik	Rasgef1a	Trim12a
Glis2	Gm14693	Ly6a
Tmed8	Ift46	Aipl1
Zfp639	Mnda	Cdc20b
Zbtb25	Plin3	Plscr1
Psmb10	Rb1cc1	Ranbp10
Hlcs	Pxk	Tsc22d3
Gnl2	Hmga2	Pfdn1
Aim1l	2310079G19Rik	Sympk
Golt1b	Ier5	Grik5
Rdh13	Ctdsp2	Napa
1700021K19Rik	Akr1c12	P2ry14
RP24-376E16.2	Cdkn2b	Golga3
Apol7c	Dfna5	Grpel1
Slc27a1	Gm10220	Ubl5
Rbm15b	Golph3l	Pttg1ip
Baiap2l1	Akap13	St7l
Mgat2	Slc17a9	Dusp14
Rev3l	Itgb5	Mboat7
Morc2a	Gstm5	Zfp622
Agxt	Vegfc	St6gal1
3110009E18Rik	Afap1l2	Ogfr
Snrpa	Dusp6	C130073F10Rik
Sf3a1	Btg2	Sepw1
1810013D10Rik	Tec	Gak
Kazn	Rbl2	Rhou
Fastkd3	Reps2	Hgs
Med26	Klf6	Mx2
Exosc4	Sqstm1	Tdrd7
Ncoa1	Hacl1	Slc30a1
Eif6	Wbscr27	Igfbp7
Canx	Cln8	Pfdn5
Abcb10	Sri	Fxyd3
Tgfbrap1	Map3k6	Vat1
Phlpp2	Hipk1	Tpt1
Ano9	Pla2g7	Hist1h2bc
Fam83h	Osmr	Mdm2
Ralb	Siae	Cx3cl1
Pgap1	Zmym5	Klhl28
Trit1	Fdx1	Psap
Zfp296	Nbeal1	Dusp13
Serpinh1	Acbd5	Golga1
Prkcq	Il5ra	Xaf1
Lrp11	Ncoa7	Tmf1
Micall2	Megf10	Atp6v0e
Tcirg1	Gm9758	Gramd1a
Cd81	Hsd17b11	Slu7
Trmt10c	Sccpdh	2410015M20Rik
Phf23	8430408G22Rik	Speer2
Slc25a26	Baz2b	Klhl21
Dnajc5	Smap2	Atp6ap1
Sh3tc1	Zranb1	Ecscr
Lgr6	AL691505.1	Cblc
Met	Map2k4	Rab4a
Wdr6	Wdr26	Gbp6
Adarb1	4930455F23Rik	Bst1
Itpr1	Snrpn	Magi1
Sf3b3	Tsg101	D330028D13Rik
Mapk14	Lysmd1	Rab3c
Nipal2	Crim1	Cish
Ptdss1	Cxcl5	Irf2bpl
Saa2	Gm4955	Mlycd
Zfp623	Spa17	Trim54
Yy1	Chmp4c	Tob1
Dnajb9	1810010H24Rik	Ing4
Gprasp1	Cdkn1b	Ssh3
Nlk	Slc26a11	Nalcn
Gm10264	Snx14	Skap2
Zcchc2	A930001N09Rik	Mylpf
Nap1l4	Ethe1	Itpripl2
Rgl2	Mdfic	Galnt13
Zfp827	Cst3	Chmp1a
Dcun1d2	Tspan15	4930579C12Rik
4930506M07Rik	Arsk	Fhl2
Alkbh5	Gabarapl1	mt-Nd5
Aco1	Smarca2	Xlr
Arhgef40	Entpd3	Tox4
Mrps18b	Hexim2	Anxa5
Uck1	Brox	Gabarap
Nisch	Tprgl	Camk1
Obsl1	Tecpr1	Dmrt1
Rbm43	Ddi2	AC158993.1
Pkp3	Speer3	Arid3a
Tmem130	Necap2	Prss46
Midn	Rnf103	Zdhhc24
Usp20	Dst	S100a11
Ksr1	Zfp677	Stx8
Zfp507	1600029D21Rik	1600014C10Rik
Gm16039	Epg5	BC017647
Psmd3	Etv1	AC122465.1
Bfar	Prr13	mt-Nd4
Wls	Tslp	Sik1
Wnt4	Speer6-ps1	Myo10
Ltbp2	RP24-547D11.3	Vcp
Tmem248	Ccng2	Ak3
Pik3r3	Tnfrsf26	H3f3a
Fam46b	Mgst1	Tmeff2
Pcbp1	Serinc3	B2m
BC016423	Apool	Asap1
Slc38a10	Ep400	Snx6
BC003965	Kctd20	Capn5
Maged1	Il12rb1	D16H22S680E
Traf3	Zfand6	Dtx2
Trpv4	Cttnbp2nl	Wdr70
Pgrmc1	Osbpl9	Ctsa
Pdgfa	Bcl6	Ndufa7
Bid	Trim13	Nrp2
Tmem88	Hip1r	Sgsm3
BC046404	Herpud2	Tfcp2
Fnip2	Tspan5	Cdk5
Exoc3l4	Rnf217	Ahi1
Dbn1	Irf8	Osbpl8
Zfp451	Rsc1a1	Lynx1
Eif4a2	Zfand5	Arpc3
Tnfrsf1b	Frmd8	Ykt6
Ddr2	Cyp4f17	4933433P14Rik
Sf3b4	Smox	Tspan1
Adck1	Mospd2	Hsbp1
Arrdc4	Fbxl20	Tifa
Cdc42ep3	Slc12a6	Ysk4
Coa3	Fam109a	Ly6f
Fam50a	Crot	4933421O10Rik
Kdm1b	Eif4ebp1	C330006K01Rik
Scyl1	1500003O03Rik	Gdi1
Hilpda	Appl2	Arhgef18
Large	Avl9	Ptdss2
Pgs1	Tmem62	Urm1
Pmepa1	Sdpr	Dmrtc1c2
Trmt61b	Wdr45	Fem1c
Pard6g	Vmp1	Samd9l
Denr	Arhgap22	Srr
Dnajb2	Eya1	Coro7
Unc119b	Jmjd1c	9130008F23Rik
Coq9	Gzmk	Cpeb4
Hspa1b	Pik3cb	Adipor2
Adam8	Btn1a1	Ubap1
Zfp143	Tacc1	Snx21
Sh3bp2	Epdr1	Rps6kc1
Mta2	Gsto2	Tank
Plekho1	Vasn	Zfp558
Gtf2h1	Phf21a	Zfp212
Isg20	Rin2	Smurf1
Oasl1	Mynn	Zhx1
Bdp1	Bcl2l15	Tmem50b
Ivd	Dgka	Dhrs9
Gtpbp3	Gm9125	Ascc2
BC048507	Hsdl2	Bcl11a
Exoc8	Tsc22d1	Tns3
Ifi30	Prkg2	Frk
Ccdc47	Dnase1l1	Zkscan6
Ubxn4	Rmnd5a	2810002N01Rik
Chtf8	Gpx8	Ano10
Nudt22	Cav1	Gls
Thoc3	Ccdc28a	Gm5828
Prkca	Slc38a9	Tef
Ippk	Zfp655	Blvrb
Dcaf5	Fam134b	Vipas39
Mapk7	Gabarapl2	Fam120b
Gdpd5	Pvr	Stx4a
Plekha6	Casp3	Sema3c
Ly75	Dstyk	Gpatch2
Zswim1	Mkrn1	Ier3
Agrn	Gbp2	Ndufa11
Naa20	Gm11507	Clybl
Mtmr4	Bmf	Mgrn1
Bcr	Hexb	Mecp2
Lat2	Plk2	Bag1
Rassf1	Cnst	Setd1b
Eml3	Exoc6	1700011J10Rik
Fem1a	Tnfrsf23	Atf6
Dlx3	Gpcpd1	Klhdc1
Rreb1	Ifi203	Dennd2c
Fzd7	Bdnf	Eps8l2
Ndrg4	Il18r1	Ppil6
Tgm1	Mettl5	Rnf31
Bahd1	Parp14	Hagh
Krt7	Fndc3a	BC030336
Klhl26	Klhdc8a	Pip5k1a
Prss27	Mxra8	Sost
Cebpb	Klc3	Rnf181
Slc39a13	Inpp5k	Tulp4
AC151989.1	Rap2b	Slc26a10
Ddit4	Tcf7l2	Vmn2r-ps53
Lcn2	Lpar6	Gm8757
Wfs1	Arhgap1	Tmem40
Slc39a6	Drd2	Lrsam1
Rhob	Ift74	Synj2
Fbxo17	Hbp1	Speer4d
Klk6	Iscu	Gng5
Nuak1	Gm13961	Cald1
Dact2	Supt4h1	Trim26
Nampt	Six4	Pcdhb17
Rab32	Gm14700	A230072E10Rik
Htra1	Slc31a2	Gba
Hk2	Cdan1	Ppp1r13l
	Ehf	Ngef
	Icam1	Kdm3a
	Anxa7	Acy3
	1700037H04Rik	Zbtb49
	Ube2j1	Ddr1
	Clk1	Macrod1
	Cryaa	Kctd5
	Rpgrip1l	Srp14
	Pcmt1	Accn5
	Cat	Rapsn
	2610307P16Rik	Gm16153
	Rictor	AC238940.3
	Slc44a2	Dnajc19
	Nck2	Herc2
	Srd5a1	Slc35f5
	Decr2	Ubd
	Bbs9	Fmn2
	Chfr	Znrf1
	Glod5	Irf1
	Znrf2	5033411D12Rik
	Tgif1	Phospho2
	Pnp	Epb4.9
	Tmem98	P2rx4
	Lnpep	Rfx5
	Gm9770	Adcy3
	Insr	Ulk2
	Prpf18	Tmem47
	C78339	Ankrd42
	Ezh1	Gm12424
	5730469M10Rik	Tshz2
	Pmm1	Ost4
	Fam100b	Camk2d
	Maml1	Plcb2
	Sft2d2	Hspb3
	Hipk2	Spag16
	Arid4b	Gpr139
	Ppip5k1	Sap18
	Maff	Frem2
	Nek3	Asxl2
	Enkur	Klhl13
	Ostf1	Frmd4b
	Usp53	Fkbp1a
	Tgfbi	Aox1
	Slc10a3	Alg11
	Ccndbp1	Nt5c2
	Stx12	Aagab
	Braf	Ccdc28b
	4930523C07Rik	Zfp287
	Trafd1	Lrrc20
	Insig2	Ubn2
	Mef2a	Tnfrsf9
	Tmem188	Csf1
	Phf8	Dsg3
	Bmpr2	Nppb
	Ralgps2	Prkcz
	Depdc7	Rhbdd1
	Tmem71	Spty2d1
	Cir1	Pgd
	Gnpda2	Bin3
	Esyt2	Msl1
	Junb	Homez
	Eif2ak1	Rnf185
	Flot1	Etfa
	Ciao1	Shfm1
	AU018091	Mink1
	Efna1	Ghrhr
	Lmo7	Emp2
	Rac1	Cd274
	Ranbp9	Chadl
	Hebp2	Tmed4
	Fmo5	Grtp1
	Pcmtd1	Rhoa
	Atp6v1e1	Nat6
	Ypel5	Ccdc171
	Tshz1	H2-M3
	Atl3	Lims1
	Grb7	Vps37a
	H1fnt	Dhx32
	Upk3bl	AARSD1
	Pgm2l1	Ttc39c
	Chchd7	Cgrrf1
	2007-03-01	S100a3
	Frg1	Samd8
	Ube2b	Zfp263
	Zbtb4	Ap1m2
	Sgtb	Fbrs
	Letm2	Myo15b
	Serinc1	Il1rn
	Tm4sf1	Mapre3
	Nat2	Slc28a2
	1810011O10Rik	Oas1g
	Spop	Med10
	1700069L16Rik	Ampd3
	Plekha4	Ppp1r12b
	Gm14079	Eif4h
	Xpa	Eif4g3
	Hectd1	Phf11
	Sbds	Krt18
	Lgmn	Tcta
	Vamp8	Fbxl21
	Tspyl1	Fam195b
	Nr2c1	Atp6v1f
	2610029I01Rik	Dusp2
	Ifi27l2a	Slc6a14
	Zfp955b	Atg4c
	Chn1	Babam1
	Plscr4	Pxn
	Aldh6a1	Katna1
	Fcho2	Cln3
	Slc45a4	Rhoc
	Rab3gap1	2900053A13Rik
	Ap3b1	Zfp62
	Parp12	Rab33b
	Glrx	Ift43
	Hdac5	Ift88
	Csgalnact2	Numa1
	Echdc2	Olfr129
	Ubap2l	Ccdc122
	Uba6	4930544G11Rik
	Gatsl2	Timm22
	5031425E22Rik	Ttc23
	N4bp2l1	Rgp1
	Styk1	Cwc25
	Chrnb1	Ufd1l
	Ocln	H2-T22
	Mcart1	Mesp2
	Rnf167	BC096441
	Ggps1	Vsig2
	Utrn	Aff4
	Lims2	Myl12b
	Mapk1ip1	Ndor1
	Rprd2	Dusp11
	Zcchc11	Cap1
	Zdhhc17	Zxdb
	Arid4a	Gm6584
	Agpat5	A830007P12Rik
	Trp53inp2	Dock6
	Gtf2b	Fgfr2
	Atg12	Cog4
	Tax1bp1	Adam12
	2410089E03Rik	Rec8
	Paip2	Ino80b
	Lrrc28	Gm6851
	Stk38	Kif3c
	Adprm	Niacr1
	Ttc30b	Ndst1
	Gnal	Atf3
	Cast	Grina
	Wwtr1	Msn
	Tiparp	Plekhm3
	1110003E01Rik	Dock7
	Ppp3ca	Abr
	Fam100a	Igf1r
	Atxn10	Gpa33
	Dnajc8	Spna2
	Ibtk	Usp54
	Khnyn	Atf2
	Speer5-ps1	Smoc2
	Hspb7	Prl14l
	Ppm1b	4930506C21Rik
	Zfp30	Trip12
	Coq10b	Ypel2
	Cxcl2	Atp6v0b
	Rgnef	S1pr2
	Prkaa1	Olfr1153
	Acox3	Ptrh1
	Fbxl3	Hexa
	Pi4k2b	Ergic2
	Fgd3	Gm12657
	Cdc14b	Bptf
	Rere	Prrc2c
	Myc	Ano8
	Mtap7	Zfyve16
	Nlrp10	Pik3c2a
	1110032A03Rik	Gm14634
	Snapin	D11Wsu47e
	Ankle2	Olah
	Dnajb6	Cntnap2
	Acadm	Ifngr2
	Plcl1	Ubr4
	Thra	Elp5
	Rab5b	Iigp1
	Unc45a	Nceh1
	Arhgef12	Pon2
	Dusp10	Nfkbib
	Nmi	Tap1
	Zscan21	Coro1b
	Tmem87b	Glrx2
	Ptges	Nkiras1
	Maf1	Ubxn1
	Psg16	Ssu72
	Steap2	Brd4
	Mff	Psme4
	1700020I14Rik	Armc7
	Ly96	Gstm3
	Trps1	Gm4954
	Rasgrf1	Wif1
	Il17ra	Tmem217
	Zbtb44	Mbd1
	Tmcc3	Zfyve26
	Ndfip1	Dap3
	Secisbp2l	Mterfd2
	Glcci1	Raver2
	Rfxank	Arhgap23
	Pyhin1	Echdc3
	Ltb	Ist1
	Cd2ap	Ppp1r10
	Tirap	Arpc2
	2002-03-01	Ythdf3
	Snx13	Moxd2
	Tnrc6b	Aftph
	Tuft1	Olfr1328
	Atp2c1	Micall1
	Leprotl1	Mras
	Arhgef7	Parp8
	Usp8	Plscr2
	Lpin2	Rabep2
	Tmem59	Il7
	Ehd4	Tcf25
	Dcaf6	Tyw1
	Sec62	Trmt12
	Zfp945	Huwe1
	Gm14737	Tmem184c
	Rnf11	Ociad2
	Kat2b	Myoz1
	Dusp1	Fyco1
	Baalc	Ankrd12
	Otud4	Faf2
	Smyd3	Slc22a18
	Spink2	Rbp1
	Riok3	Fam54b
	Msrb1	Plin2
	Olfr1349	Spaca7
	Med21	Mapk9
	Itgav	Ctnna1
	Birc3	Apobec3
	Arhgef11	Fank1
	Speer4e	Tmem106c
	Mpp5	Slc25a43
	Snap29	Igsf5
	Pik3ca	Gtf2ird2
	Fcgrt	Phyhipl
	Vmn1r18	Clip4
	Pbx1	Tmem176a
	Ccnc	Tnfaip3
	Rad52	Cebpg
	Heca	Adamts18
	Cyp2c44	Hexim1
	Srpk2	Mon1a
	Tnfrsf22	Klf2
	Olfr1372-ps1	Napsa
	Dynlt1c	Pcdha10
	Txndc16	Rhbdl2
	Cd47	Snrnp27
	Fam177a	Fbxl2
	Cubn	Mtf1
	Nipal3	Irx4
	Aida	Jtb
	D730039F16Rik	Bcl2l1
	Gm9812	Tm2d1
	Zfp874b	Sec63
	AW549877	Eea1
	Il1a	Elmo3
	Wdr44	Gm11602
	Agpat4	Sh3rf3
	Mthfs	H2afy
	Tor1aip2	Itgal
	Fermt1	Prpf6
	Klhl8	Dcaf11
	Epb4.1l5	Vps13c
	Bcas3	Ank3
	Ulk1	4930500J02Rik
	Gpr56	Psmd4
	Arhgef5	Col10a1
	Klhl24	Zfhx3
	Aig1	Zbtb26
	Arid2	Kcnj15
	Zfp185	Usp19
	Kif3a	Tug1
	Mettl7a1	Hif3a
	Itm2b	Nhlrc2
	Shroom2	AC137970.1
	Olfr352	Zfx
	Cyp4f13	Paip1
	Pdlim5	Zfp36
	Gm10634	Cytl1
	Thsd4	Slc29a3
	Acsbg1	Rbm48
	Gtf2f1	Dctn2
	Glis3	Gfra3
	Rab31	Disp1
	Slc2a8	Elf3
	Vbp1	Mfsd9
	Pnpla8	Kcnq1
	Ralbp1	Ptpn14
	Gm14654	AI837181
	Scarb2	Zfp949
	Ralgapb	Tap2
	Chd6	Rab2a
	Tbx6	Gga3
	Dock9	Gm10080
	C1ra	Olfr1015
	Perp	Tnfaip8
	Slc25a35	Myl6
	Adipor1	Hsd17b12
	Prdm1	Pld1
	Syf2	E330021D16Rik
	Akt3	Capns1
	Gpsm3	Tmub2
	Adck4	Bhlhe40
	Ccdc90b	Capg
	Napg	Psmd2
	Klf5	Atp5l
	AC158295.1	Lyrm2
	Caml	Diap2
	Kdm6a	Tom1l2
	Tmtc4	Cox7b
	Tnfsf12	Vps45
	Cav2	Stau2
	Smad4	Gm20499
	Rtn3	Atp5s
	Rnf146	Tcf4
	Wipi2	Rab35
	Dpy19l4	Fbxo44
	Cmbl	H2-T23
	2310022B05Rik	Sharpin
	Snap23	Itfg1
	D1Ertd622e	Ppp1r3a
	Dirc2	Tceb3
	Pnrc1	Hist3h2a
	Otud7b	Tiam2
	Zwint	Bet1l
	Zfp386	Wipf2
	Ell	Brap
	Nxt2	Fgfr1op2
	Ube2f	9430091E24Rik
	Tgds	Dctn4
	Mier1	Prnp
	Arid5b	Eif2c3
	Pyroxd1	Pygb
	Rnf19a	Degs1
	Malat1	Rtn1
	Col8a1	H2-Oa
	Pllp	Ubn1
	Taok3	Pi4k2a
	Fbxw8	2610204G22Rik
	Pard3	Fcf1
	Whamm	Ccng1
	Tex261	Stam2
	Osbpl11	Trrap
	Oaz2	Clip1
	Glmn	Tmem128
	Plcxd2	Sall4
	Zbtb8b	Tmem167b
	Wdfy1	Flad1
	Zrsr1	Ptpre
	Irf2	Egf
	Fbxo8	Trappc1
	Tspan8	Creb3
	Sh3bgrl	Olfr430
	Sertad2	Cdipt
	Micu1	Cul2
	Ube2r2	Med28
	Zfp772	Aox3
	Jak1	Wnt5b
	Gm3912	Acvr1c
	Atg13	Neb
	Rsbn1l	Mea1
	Csnk1g3	Fas
	Lpin1	Ldb1
	A2ld1	Mertk
	Nupr1	Nkain2
	Slc35e3	Dpp8
	Mat2b	Itsn2
	Wdr37	Kank2
	Trpc4ap	H13
	Bbx	Gpd2
	Vamp5	Rxfp1
	Tbc1d23	Spg21
	Chm	Rfx2
	5530601H04Rik	Aldh3b1
	Harbi1	Phldb1
	Stxbp3a	Tmem30a
	0610040B10Rik	Ttll5
	Ddb1	Snx30
	Mta3	Capzb
	Ankrd13c	Ap3s2
	Zfp955a	Pea15a
	Snrk	Exoc7
	Slc44a4	Psd3
	Gcc2	Trip4
	Hsd17b4	Map3k14
	Ttc33	Fam175b
	Tmem184a	Olfr1009
	Rpap2	Tbx21
	Tpd52l2	Nit1
	Abca5	Slc3a1
	Gpbp1l1	Speer4f
	Akr1c19	Adora3
	Mmp10	Osbpl5
	Rabac1	Nr3c1
	Cript	Mob3c
	Pnpla7	Rnf14
	Rasa1	Mark3
	Arhgef1	Ppp1r14c
	Gm15405	Zfp87
	Stx5a	Lsm10
	Zfp229	Fetub
	Clp1	Gm7052
	Atg14	Plekhn1
	Cdk19	B4galt1
	Kif5c	Tlr3
	Cldn4	Sepsecs
	Ptpdc1	Klhl18
	Vcpip1	Wdr53
	Hid1	Glb1
	Chst8	Ptpn1
	Ppp1cb	Adrb2
	Foxn3	Slfn2
	Ccni	Tmem63b
	Dock8	Atp9a
	Csf2rb	Aptx
	Sqrdl	Capn7
	Slc39a4	Emc9
	Ccdc53	Gm12927
	Wdr60	Cypt4
	Fam174a	Adamtsl4
	Gch1	Prg4
	Rassf5	Zmat4
	Lrrc8c	Olfr197
	Rsu1	Stk10
	Cyb5	C2cd2
	Crybg3	Opa1
	Ypel1	1110038D17Rik
	Mafk	C330005M16Rik
	Samhd1	Ctsb
	1700023L04Rik	Ttc26
	Ubxn6	Cd7
	Trim34a	Zfp597
	Car5b	Olfr1276
	Kidins220	Suv420h1
	Gm12942	Cdkn1a
	Cyp2s1	Zbtb24
	Ubr2	Fam19a3
	Strn	Nos1
	Lrrn4cl	Slc6a8
	Rc3h2	Cyb5d1
	Mpzl1	Gna12
	Slc22a23	Ash1l
	4930563D23Rik	Atxn1l
	B3gntl1	Taz
	Gm16515	Purg
	Trim23	Slc26a9
	Cth	Ttpal
	Malt1	Atp8b3
	Zfp658	Olfr630
	Atxn3	Lhx9
	Exoc2	1500009C09Rik
	Tmc6	Cox7a2l
	Atp6v0d1	Mcoln1
	Fam103a1	Mpdu1
	Madd	Golga7
	Scp2	Acaa1a
	Dtx4	Pggt1b
	4833439L19Rik	Fam133b
	Pik3cd	Olfr1472
	Car2	Gosr2
	Ginm1	Ndufv3
	Glg1	Sypl
	Urod	Rnh1
	Ogt	Zfp46
	Ctnnd1	Gm5480
	Zfp560	D4Wsu53e
	Zfyve27	C330011M18Rik
	Cmas	Rest
	Krit1	Epb4.1l4a
	Bsdc1	Wbp7
	D030047H15Rik	Tfb2m
	3230401D17Rik	Prdm2
	Ip6k2	Cflar
	Gm14801	Ttc38
	Chmp5	Spdya
	Xdh	Anks3
	Fbxo25	Aff1
	Gm14047	Zfp352
	Sorcs3	Tbc1d9
	Dub1	C77080
	Ubr1	Uckl1
	Eapp	Gm5935
	Add1	Gm15724
	Olfr319	Pxmp2
	Rbms1	5430405H02Rik
	Rnasel	Stk11
	Ets1	Renbp
	Asap2	Vps11
	Bcl2l11	1700026D08Rik
	Tnip1	Atp2a1
	Ccdc68	Vps37c
	Cmtm6	BC006965
	Radil	Ube3b
	Tmsb4x	N4bp1
	Vamp7	Taf7
	St18	Rab18
	Mospd1	Ascc1
	Lrrc57	Zdhhc5
	Ubxn2a	Cyp2f2
	Slk	Hivep2
	Lmbrd1	Kdm3b
	Btg1	Cdkl1
	Tmem38a	Pon3
	Gm12026	Vwa7
	1810030N24Rik	1500011B03Rik
	Ltbp1	Atp6v1a
	Hipk3	4930463O16Rik
	Fam82b	Kansl3
	Prune	Dynlt3
	Erbb2ip	Crcp
	Psmd8	Fam76a
	Exph5	Rbm42
	Cd82	Sh3bgrl3
	Cr1l	Zfp738
	Csrp2	H2-Q1
	Carhsp1	Tcstv3
	Vps4b	2310021P13Rik
	Lats2	Cd68
	Med13l	Gm12590
	Ttc1	9830144P21Rik
	Scly	Mefv
	Yes1	Cd99l2
	Xrn1	Kynu
	Irgq	4933434I20Rik
	Oxr1	Relb
	Sh3bgrl2	Gm14420
	Itgb6	Nfkbiz
	Cd109	Lasp1
	Sh3d19	AC157896.1
	2410018M08Rik	Klf7
	A630007B06Rik	Acp2
	Pck2	Necap1
	Ly6c1	Lgals9
	Gse1	Dctn3
	C1s	Ndufa1
	Slc41a1	Kndc1
	Mysm1	Arl3
	Tmem127	Rsf1
	Tmco3	Adamts16
	Acad11	Mtch1
	Olfr1384	Akr1a1
	Amn1	Neu3
	Spire1	9130017N09Rik
	Parp4	Nfix
	Mtor	Cox6c
	Tmem184b	Gm16428
	Tbc1d17	Hint2
	Wdyhv1	1700109H08Rik
	Epc2	Copa
	Sgk3	8430410K20Rik
	Rbm41	Tcn2
	Pgm3	Tor1aip1
	Zfp944	Inppl1
	Rpusd1	Olfr1337
	Bbs7	Armc3
	Gss	Adam9
	Ap3s1	Sp110
	Twf2	Chrna9
	Myo1e	Zfp14
	Zdhhc9	Mcf2l
	Crlf3	Mark4
	Dcaf8	Dnajc3
	Yipf4	Cpt1c
	R3hdm4	Ociad1
	Ctps2	Arl4c
	Nfkbie	Cib1
	Synpo2l	Vti1b
	F8a	Clasp1
	Dennd5a	Pml
	Sfxn3	Nktr
	Gng12	Psmb5
	AW112010	Cog3
	4930402H24Rik	Tmem19
	Myo1d	Csf2
	Trim12c	Myf6
	Fryl	Pan3
	Lnx1	Spata9
	Mtmr6	Ankrd6
	D19Wsu162e	Stat5b
	Mkx	Bst2
	4930453N24Rik	Foxb1
	Plekha5	Ecm1
	Rras2	Creb1
	Hip1	Rcan1
	Peli1	Scamp1
	Chmp2b	Rnf166
	Uhrf1bp1l	Slc48a1
	Il28ra	Uba5
	Sh2d4a	Kif1b
	Btrc	Appl1
	Ebp	Mudeng
	Lrrk1	Aldoart2
	Arhgap18	Mocs3
	Kctd10	mt-Atp6
	Tmem106b	Neurl3
	Cpe	Slc35a2
	Zmynd15	Olfr340
	Btd	Fkbp8
	Atg16l2	Jkamp
	Mpp6	Sod1
	Dock5	Acvr2a
	Slc37a3	Fbxl5
	Lrif1	Wdr81
	Olfr1353	Pbx4
	Cds2	Rsbn1
	Pcsk7	1110051M20Rik
	Aldoc	Map3k9
	Mapk3	Mrpl38
	Ndel1	Slc35a3
	Armc10	Psmb1
	Arhgap42	Dbndd1
	Mob4	Pla2g4b
	Nqo2	Trim41
	Ganc	Uap1l1
	Inpp5f	Rgs10
	Abtb1	Mknk1
	Ctsl	1110046J04Rik
	Usp18	Zswim4
	Ncoa2	Tmem203
	Pcyt1b	2005-03-01
	Serpinb6b	AI316807
	Cnppd1	Arl14ep
	Rbpms	Rac2
	Fam63b	Poldip3
	Txnip	9430020K01Rik
	Prss8	Nckap5
	Papd5	Gnas
	Aph1b	Klk8
	Mettl7a2	Dnttip1
	Gm11395	Lysmd3
	Arl4d	Pdk2
	Serpinb6a	Kif9
	Snx9	Tmem63a
	Cnot6l	Kdm5b
	Pls3	Htr1d
	Klhdc2	Tapbpl
	Cage1	Smap1
	Rab11a	Commd4
	Sdc2	Trmt13
	Rufy2	Wnt1
	Ddt	Eps8l1
	Ppbp	Rwdd2a
	Mbnl2	Syngr1
	Vgll4	Cbl
	Ankrd11	Trmt10b
	Stk4	Txndc11
	Xlr4b	6430571L13Rik
	Snap47	Plcg2
	2810403A07Rik	Gfer
	AC108401.2	Trub2
	Rexo2	Vangl2
	Fam32a	Il11ra1
	Abcc5	Prkd2
	Gramd1c	Bcl2l2
	Rnf216	Gm11476
	4930412M03Rik	Rasgrp1
	Gramd3	Zfp688
	Ccdc157	Tnk1
	Arl13b	Psen2
	Cdkn2a	Ube2d1
	Arap3	Strc
	Smad3	Glrx3
	Fam13b	Ndufs5
	Cxcl16	Dpp10
	Tusc2	Spata1
	Cbr4	Sap30bp
	Usp32	Crtc2
	Oip5	Ube2a
	Fga	Rnf6
	Frs2	Wbscr17
	Zer1	Ucma
	Ppm1a	Ccdc136
	Ccdc173	Bmp1
	Slc13a5	Tub
	B630005N14Rik	Wwp2
	Fbxo33	Tmem242
	Fam123a	4930538K18Rik
	Rhobtb1	Lce1a2
	Ear2	Obscn
	Snapc5	Gna15
	Filip1l	AC161602.1
	Spsb2	Rin3
	Spint1	Flcn
	Grin3a	Tssc1
	Gm527	Cox17
	Tlr6	Ppp2r5b
	Pttg1	Gapvd1
	Tsc1	Diap1
	Rabgap1	Fam123c
	Slc35b3	Ankrd44
	Glul	Mtmr7
	Sbno2	Cox6b1
	Mitf	Ndufa6
	Zmynd11	Ppp4r2
	1810013L24Rik	l7Rn6
	Fam45a	Sp4
	F2r	Rab40c
	Ctso	Fam176a
	Arpc5	Ngly1
	AC099930.1	Tfe3
	Aim1	Fbxo2
	Reep3	Elf1
	Cbwd1	Atp6v1c1
	Tmem202	Ufc1
	Ankrd40	Wdr38
	Nthl1	Nemf
	Dusp16	AC027184.1
	Cdcp1	Prcp
	Kansl1	Eno2
	Sdcbp	Stxbp4
	Vsig10	Plcd1
	Crnkl1	Mtap
	Tgoln1	Laptm4a
	Zbtb42	Eif3k
	Map4k5	Lamc2
	Lrig2	Ndufs2
	Snx4	Ints12
	Nfs1	Poln
	Abcb4	Pddc1
	Yipf3	Vps33a
	Nedd4l	Vps53
	Helz	Rnaset2b
	Twf1	Katnal1
	Fam134c	Arid1b
	AC142191.1	Sdf4
	Pramef8	Cdc37
	Zdhhc20	Zfp654
	Synj1	Ric8
	Itga6	Camsap3
	Lin7c	Sec14l1
	Rab43	Arhgap29
	Zufsp	Nosip
	Zfp711	Ppp1r18
	Lcor	Vma21
	Mosc2	Pglyrp2
	Plekhh1	Cdk6
	Hook3	Vps37d
	Selk	Itgb1
	Nudt17	Etv4
	Fip1l1	Rogdi
	Aqp7	Bfsp1
	Dnajb12	1700128E19Rik
	Asl	Asxl1
	B3gnt3	Pafah1b3
	Hbxip	Lrp10
	Fech	Rbm5
	Vta1	Hbq1b
	Nt5dc1	Trim5
	Socs2	Acaa1b
	Gpatch8	Rbbp9
	Zfp385b	AA987161
	Pion	Leng9
	Jak2	Zfp384
	Ppil2	Rnaseh1
	Polr3gl	Acot8
	Flt1	2410042D21Rik
	Ugdh	1200011I18Rik
	Rc3h1	Cyba
	Npc1	Zfp595
	Txndc12	Ptpn13
	Traf1	Usp42
	Dazap2	4921531C22Rik
	Rassf8	Slc44a1
	Lepr	9430023L20Rik
	Senp7	Gm5753
	Auh	Stx1a
	Anapc2	Nek1
	Serpinb3b	Higd2a
	2410001C21Rik	Ptpn7
	Paics	Rnf13
	BC051665	Mpp1
	Wrn	Psmb5-ps
	Rabgap1l	Il4ra
	Arhgap9	Mapkapk2
	9130206I24Rik	Ficd
	Mnat1	Card10
	Igsf23	Hmbox1
	Chit1	Slc25a36
	F11r	Ltbp3
	4632415K11Rik	Ipmk
	Ankrd1	Dhrs11
	Arhgef9	Gm10678
	Gdpd3	Akr1b8
	Atg9b	Stat2
	Fbxo38	Heatr7a
	Arhgap44	Amz2
	Cpt1a	Fam117a
	Slco4a1	Spcs1
	Tbc1d22a	Fxyd6
	B230312A22Rik	Kcne1
	Cd38	AC161511.1
	Rasip1	Kif5a
	Zadh2	AF067063
	Nek9	Mtpn
	Tmem123	Cd63
	Eml2	Lypd2
	Gm16372	Pitx3
	Tmem212	Gm13771
	Dstn	Igsf3
	Rnpc3	Trip11
	Rffl	Acvr1b
	Itch	Tmprss15
	Erlec1	Ccdc55
	3110002H16Rik	Skida1
	Zmat2	Robo2
	Sar1b	Acbd3
	Mcl1	Trim8
	Xlr4c	Ildr1
	Gigyf2	Gatad2b
	Zfp943	Ctnnd2
	Kdm1a	Txndc17
	Hdac8	Rnf114
	Creb3l4	Wdr34
	4931406P16Rik	Osbpl10
	Hint3	Car7
	Pef1	Zkscan3
	Slc30a5	Pde6h
	Ei24	Cacna1b
	Cmpk1	Arx
	Zfhx2	Ccdc112
	Srcin1	Vps26a
	Stx16	Arhgef2
	Ceacam19	Prss50
	4922501C03Rik	Sbk1
	Ube4a	9030624J02Rik
	1700021A07Rik	Dnmt3a
	Cyld	Bloc1s6
	Arhgap12	Ctsw
	Fmn1	Sin3b
	1700009N14Rik	Ccz1
	Litaf	Zdhhc21
	Lonp2	Olfr772
	Fam63a	Atxn7l1
	Sdf2	Pdzd7
	Clec5a	Airn
	F3	Ccdc130
	Abcb1b	Daam2
	Marf1	Rnf169
	Stard3	Atp11a
	Tceb2	Gm15787
	1700128F08Rik	Dtx3l
	Iah1	Ankhd1
	Pigc	Ifitm3
	Akr1b10	9130023H24Rik
	Mgea5	Tmem87a
	Sike1	Gm6768
	Gm12166	Tspan14
	Dhx40	Metrnl
	Cacul1	Gm11434
	Gpr83	Tm2d2
	Atg4b	Tnks
	Gm12060	Gm15800
	5330438D12Rik	Cox4i1
	P2ry1	Prdx1
	Otud5	Odc1
	Tfcp2l1	Tmem66
	Dhx57	Aldh7a1
	Agtrap	Olfr1427
	0610010O12Rik	Olfr770
	Zfp217	Gm13788
	Tnks2	Fer1l4
	C130074G19Rik	2010111I01Rik
	Gm12100	Ncoa3
	Mbd5	Clec4g
	Pfkp	Gna13
	Lin37	Flna
	Fam164a	Il1rl1
	Anxa11	Ccnl1
	Lrp5	Olfr1443
	Bcl2l13	Fbxl18
	4930525M21Rik	Rbm27
	Ppp1r12a	Psenen
	Cnot8	Iqub
	Cep120	Catsperb
	Rcan3	Limd2
	Erlin2	Sucla2
	Gm15760	AI661453
	Stap2	Grsf1
	Numb	Gm7247
	Col4a3bp	Ank1
	Pir	H2-Q5
	Bach2	Ephx1
	Zfp266	Zfp740
	Psmd11	Otub1
	Rnft1	Rnf214
	Deptor	Tnfrsf14
	Gmfb	Amigo1
	Sestd1	Ccdc109b
	Ap4b1	Lrch1
	Sfxn4	Mical3
	Chd2	Slc46a3
	Zfp326	Cpeb3
	Ubxn7	Mfsd8
	Pim1	Adamts12
	Nudt15	Zfp407
	Dcaf10	Fahd1
	Olfr1366	Gipc1
	Cept1	Tmem183a
	Tada3	Ralgps1
	Tmlhe	Dbp
	Fam18b	Dnase1l3
	Snx33	Aldh3b2
	Tmem176b	Ghr
	Rab13	Pqlc2
	Fam102a	Mtif3
	Nr1d1	Purb
	App	Ubqln1
	Lrrc8a	Slc44a3
	RP23-285C18.2	Hes6
	Fam129a	Xrn2
	Supt7l	Psmf1
	Dsp	Rcn3
	Fam53c	Rchy1
	Pex19	Bmpr1a
	Uaca	Mfn2
	AC147048.1	Prdx4
	RP23-302C16.2	Stxbp2
	Osbpl3	Cbll1
	Serpinb1b	Nat9
	Rod1	Ak5
	Tbx3	Hsh2d
	Cdh1	Dap
	Cep128	Cryab
	Ubl7	Anapc7
	Arhgap10	Hspa2
	Klf8	Sh2d4b
	Plk1s1	Mtmr1
	Atat1	A830080D01Rik
	Itfg3	Mcam
	Stx6	Tmem59l
	Fbxo3	Clhc1
	Sdccag8	Nap1l2
	Hnrnpm	Samd4
	Usp48	Rbp2
	Efhb	Zfp335
	Chmp4b	AI462493
	BC031181	H2-M2
	Cyp4f16	Gcat
	Acpt	Hivep1
	Itpr3	Clint1
	Dhrs7	Cramp1l
	4933403F05Rik	Mmp11
	Cyth3	Sdk2
	Dmxl2	Csrnp1
	Cyp1b1	Fbxo15
	Klf3	4930515G01Rik
	Apbb2	Mon1b
	Tcp11l1	Gm10229
	Spin4	Limd1
	Inadl	Tmem101
	Kdm5a	Ggnbp1
	Ly6g5c	Gm9846
	1110012L19Rik	Spg11
	Ing3	Nagk
	Luc7l2	Orc5
	Sidt2	Ptp4a3
	Wash	Cbr1
	Itgb8	Olfr54
	Gm16223	Nsa2
	Naip2	Gm13120
	Kbtbd2	Zfyve9
	Zc3h7a	Abtb2
	Aldh3a2	Tnfrsf13b
	Zbtb43	Cdk10
	Neil2	BC005537
	Pls1	Skil
	Dnajc28	Fam118b
	Spn	Sirt2
	Zfp773	Prrc1
	Dok4	Zmiz1
	Itm2c	Alox12b
	Lig3	Zkscan1
	Cdc40	Mpv17l
	Zfp7	Ift57
	Ccdc90a	Dyx1c1
	Zfp11	AL607123.2
	Gm20687	Ttf1
	Cdc42	Sra1
	2310030G06Rik	Tceal1
	Acadl	Fbxo28
	Rassf6	Setmar
	Rragc	Fbxo18
	Trib1	Fam192a
	1700088E04Rik	Crisp1
	Mtmr3	Scap
	Gprc5a	Cyb561d1
	Tbcb	Kansl1l
	Sesn2	Zbtb37
	C130050O18Rik	Slc16a13
	Tra2a	Taf6l
	Ubc	Slx1b
	Ifit2	Lhfpl4
	Depdc5	Scnm1-ps
	Rbm18	Gm14446
	Zcchc6	Plagl2
	Pptc7	Ccl2
	Gm14088	Stard10
	Rnf115	Inca1
	Zfp758	Eaf1
	Smg6	Aanat
	Slain2	Gpd1l
	Mast4	Fgl2
	Ift122	Nlrp2
	Trex2	Olfr683
	Foxa1	Gpr179
	Ift20	Ang2
	Mc4r	Tbc1d19
	Mppe1	Fis1
	Nbea	Ncoa4
	Sppl2a	Arhgap26
	Slc7a11	Rnf111
	Olfr1404	Nudt4
	Slc25a20	Upf2
	Scmh1	Psme1
	Erbb2	Tmem41b
	Cstf3	Hes2
	Bmyc	Myst4
	Slc22a4	Ech1
	Sip1	Acot10
	Acpp	Adam11
	Gstt3	Spata25
	Flot2	Brd3
	Manea	Becn1
	Actr8	AC130214.1
	Stau1	Ttc12
	Pqlc3	Zfp788
	Ang5	Polr3b
	Sparc	Psmb6
	2006-03-01	Olfr584
	Uhmk1	Dock2
	Trpv2	1700010I14Rik
	Sacm1l	Il1r2
	Mtmr14	Olfr661
	Pip5k1b	Arhgef37
	Gm2a	Irx2
	Csad	H2-D1
	Dennd1b	Trappc10
	Ccnt2	AC114988.1
	Golph3	Prrxl1
	Lsr	Actr2
	Snx11	Ccdc43
	Arhgef25	Usp9x
	Mon2	2700097O09Rik
	Elp3	Pdp1
	Rorc	Erc1
	Ly6i	Myocd
	Rab3d	Nobox
	Mbtd1	Rlim
	Mlxip	Ube2o
	Adck5	Gtf2a1
	Gosr1	0610009B22Rik
	Trim56	Taldo1
	Cebpd	Bmp4
	Antxr2	L3mbtl3
	1110021L09Rik	AC163611.1
	Aplp2	Dync2h1
	Pigp	Fut11
	Gstt1	Igf2bp2
	Naa35	Zfpl1
	Il18rap	Actr10
	Arl5b	Ophn1
	Klf13	Meis1
	Nek8	Edf1
	Golgb1	Rab36
	Fam3a	Btbd9
	Ikbkg	Ftsjd2
	Uqcrh	Tmprss6
	Gm20632	Cops6
	Smtn	Map2k7
	Pnpla2	Orai2
	Gal3st1	Pde1a
	Nadsyn1	Flywch1
	Syne2	Rab30
	Kdm4a	Paqr3
	Cpne3	Klhl20
	Gjb4	Nucb1
	Hscb	Uba3
	Cdc42bpa	Crhr2
	Hcls1	Lilra6
	Smc5	D6Wsu163e
	Isca1	Ddx17
	Pdcl2	Rarg
	Gm10324	CAAA01180111.1
	Pik3c3	Prdx2
	Senp8	Elf4
	Rab11fip5	Akirin2
	Lmbr1l	Ctns
	Akap9	Arhgap33
	Xrcc4	Ehd1
	Tk2	Nedd4
	Acot13	Celf2
	Rab2b	Smcr7l
	Fam160b1	Copz2
	Git2	Slc9a3r2
	Gcap14	Dpp7
	Gcnt2	1810030O07Rik
	Hspb9	Vmn2r42
	Esm1	Asprv1
	Ccdc174	D17Wsu92e
	Coil	Utf1
	Zfp444	Crlf2
	Actl6b	Cdk12
	Gm8038	Wdr19
	Atg5	Tmem51
	Rnd1	Slc25a45
	Zfp281	Hspa1l
	Fgfr1	Wdr59
	Ogg1	1700056E22Rik
	Zfp40	Sox4
	Vps13b	D930015E06Rik
	Abi1	Rab21
	Dlg1	Stard3nl
	Cdkn2aip	AU019823
	Inf2	Slamf7
	Fhdc1	Heatr6
	Yipf1	Sde2
	Atf5	Eps15l1
	Gm12043	Gm5077
	Ambra1	Prmt2
	Tmem167	Zfp239
	6720401G13Rik	Mapkapk3
	Stoml1	Pla2g4c
	Sat2	Slco1a5
	Ndrg2	Usp25
	Akip1	Gm11531
	Eif5a2	Use1
	Bet1	Gm8902
	Cd9	Trappc6b
	1110002L01Rik	Eda2r
	Axl	Pex3
	Ccdc17	Basp1
	Rpa3	Gorab
	Klc4	Olfr58
	Tbrg1	St13
	Lphn3	S100g
	Cd59a	Kcne2
	3110043O21Rik	Arpc1a
	Jmy	Dtnb
	Gpr101	Msi2
	Trf	Nanos2
	Btbd6	Npepps
	Syap1	Pde1b
	Rasa2	Mndal
	Nrd1	Rhd
	Dpm1	Duox2
	Itga2	Dcaf7
	Bbs4	Zfp790
	Polr3c	Lins
	Six1	Ppm1d
	Synj2bp	Anxa4
	Ptcd1	Nudt14
	Sos2	Tbl1xr1
	Nkiras2	Ppp1r2
	Atpif1	Col9a1
	Ap1g1	6330416G13Rik
	Dync1i2	Smarcal1
	Pld3	Btf3l4
	Vps39	Ranbp3
	Wdtc1	Clcc1
	Zkscan14	Mrpl22
	Slit2	Dcakd
	Olfr531	Adprh
	Wbp2	Eef2k
	Zxdc	U2af2
	Nhlrc3	Eif2ak4
	Wasl	Mphosph6
	Apaf1	Hdac7
	1110058L19Rik	Ctdspl2
	Nub1	Ap2m1
	Cldn3	Hoxc5
	Grpel2	Pum1
	Vps4a	Nol4
	D3Ertd254e	Mfsd10
	Krcc1	Mtmr12
	Tyk2	Mall
	Zmym2	Olfr1431
	Med23	Pet112l
	Sumo1	Ccdc25
	Gm16124	Gpaa1
	Blvra	Adap1
	Pts	Adat3
	Zfp329	1700030K09Rik
	Ccs	Gsk3a
	Mfsd6	Ugp2
	Fam72a	Ppp2r2a
	Epb4.1l2	Qk
	Lysmd4	Timm17b
	Ephb6	Pomgnt1
	Zfp120	Fbxo7
	Cadm3	Erp44
	Fbxo36	Fbxl17
	Rab17	Olfr976
	Gm14269	Gpr133
	Nfe2l1	Socs4
	Tmem170	Samd14
	Nudt7	Xpnpep3
	Ubb	Nol10
	Asb7	Rmnd1
	Phactr4	Slc27a2
	Med13	Lrrc40
	Sugt1	Sms
	Kdsr	Arl8b
	Mccc1	Btk
	0610031J06Rik	Rnf138
	Ccnjl	4930590J08Rik
	Mbp	Rnf152
	Gm16536	Ccdc46
	Zfp954	Nsun5
	Gfpt1	Dis3l2
	Gba2	Slc25a29
	Ifi47	Mtpap
	Eps15	Atp5c1
	Ptprk	Ddx41
	Telomerase-vert	Smek1
	Akap2	Gm5797
	Snw1	Ncaph2
	Ttbk2	Obfc1
	4933434E20Rik	Tspan13
	Zc3h15	E230019M04Rik
	Ppfibp1	Fam35a
	Gm4285	Rap1a
	Rnf10	Tmub1
	Eif4e2	Cdc123
	Fcgr1	Lca5
	Gatad1	Polr3d
	Cib2	Ap4m1
	Mmd	Ints8
	Stambp	Ing1
	Abhd5	Ubxn8
	Tsc2	Mblac2
	Ptcd3	Orc4
	Dsg1c	Armc6
	Asah2	Ero1l
	Chkb	Crat
	Asb4	Mrs2
	Atf7	Ncapd2
	Zfp54	Lrpap1
	Idnk	Ndufv2
	Map3k3	Immt
	Spryd3	Fastkd5
	Glyr1	Mll3
	Arih1	Wrnip1
	Las1l	Hiatl1
	Wasf2	Pip4k2a
	Akt1s1	Mtmr2
	Cisd2	Hcrt
	Gm16381	Nrf1
	Rnf24	Abcb7
	Ablim1	Rgs9bp
	Dynlrb1	Rnf130
	Dnm2	Ywhae
	Prkd3	Ufl1
	Ndc80	Agps
	Spag9	Phf15
	Gm6460	Nupl2
	Eya3	Ctxn1
	Tmbim6	4921536K21Rik
	Npdc1	Sirt5
	Hsd3b7	Yme1l1
	Defb11	Diexf
	Tex2	Usp45
	Rit1	2210015D19Rik
	Cdpf1	D14Abb1e
	Pde12	Terf1
	Grk5	Tmx3
	Mtap9	E2f5
	Slc1a1	Adh5
	Ncam1	Spats2
	Ankzf1	Kif21a
	Sepp1	Nmnat2
	Scfd2	Gm12712
	Arl1	Gnat2
	Zfp867	1810012P15Rik
	Pou2f3	3110053B16Rik
	Myh9	Zscan12
	Cyhr1	Gm11627
	Dcaf12	Lsm1
	Smpd2	Gtf3c5
	4732418C07Rik	Unc93b1
	Esco1	Gm16394
	Lgals3	Strbp
	Ap4e1	Olfr1102
	Snapc3	Zfand4
	Mrpl33	2002-09-01
	Rnf2	Insig1
	Mapkap1	Rps19bp1
	Nrbf2	Gm1631
	Ikzf2	Fra10ac1
	Opcml	Rhno1
	Cxadr	Vangl1
	Pias2	Ccdc21
	Os9	Tnfrsf10b
	Mocs2	Ncan
	Glod4	Ogdh
	Gbp3	AC125115.1
	Vps41	Cnot1
	Thpo	Arl5a
	Aldoart1	Atr
	Ano6	Snx27
	Ints4	Svil
	Igf2bp1	Snrpb2
	Zfp52	2011-09-01
	Mfap3	Ppt1
	Zfp58	Phxr4
	Kdm4b	Mrps14
	Rala	Ube2w
	Usp12	Pdcl
	Foxj3	Nif3l1
	Sh3glb1	Derl1
	Ptgr1	Fzd2
	Prrx2	Ercc8
	Cacna2d2	Papola
	Arnt	Vps29
	Gnl3l	Ccr10
	D18Ertd653e	Ppie
	Il15	Atf1
	Zfp951	Vmn2r-ps11
	Epcam	Tceanc
	Gstm1	Hnrnpl
	Lrrc31	Bms1
	Cul4b	Slc35c2
	Zeb2	H2-Ke6
	Bdh2	1700125H20Rik
	Grn	Lphn1
	Atxn1	Grhl1
	Cops5	Palb2
	Rora	Optn
	Tmem192	Faah
	Slc9a6	Mbd4
	Atp6v1d	Klhdc4
	Ly6c2	Ap3m1
	Csnk1e	Agpat6
	Arhgef3	5730419I09Rik
	Nucb2	Fxc1
	Cep97	Klra3
	Fars2	Wdr61
	Gsn	Gemin5
	Angptl7	BC022960
	Ilk	Gm6292
	Ggt5	AC152453.2
	Ppp1r7	Ifitm10
	Rhbdd2	Trove2
	Nek6	Ppp6r3
	Larp4	Slc19a2
	Pex2	Rabl3
	Elmod2	Rbm28
	Thbs4	Spr
	Vegfb	Ndufa8
	Plek2	Bckdhb
	Srsf3	Ebf4
	Zcchc8	Mrpl28
	Ppp2r3a	Dnlz
	Nudt8	Tomm6
	Ssh2	Nln
	Matr3	2410022L05Rik
	Mphosph10	Sf3a3
	Araf	Ank2
	Prkag2	Srebf1
	Tram1	Parp16
	Nqo1	Eri2
	Taf9	Cpsf7
	Txnrd1	Rps19
	Rbbp8	Cnpy3
	Fst	Plec
	Prmt6	Nlrx1
	Usp14	Zfp503
	Emg1	Zfp689
	Cyp20a1	Cep76
	Zfp599	Map3k1
	Nus1	Nono
	Eif4g2	Pcm1
	Atp1b3	Esr2
	Lnp	Lpcat1
	Agl	Thnsl1
	Get4	Lamtor3
	Fgfr1op	Entpd6
	St3gal4	Rilp
	Gls2	Wdr8
	Hspe1	Usp46
	Cluap1	Fam38b
	Elfn2	Map4k4
	Gm13157	Tmem179
	Cd24a	Acp1
	Taf5l	U2af1l4
	Gnl1	Sub1
	Fuca2	Pdcd5
	Tapt1	Zfp369
	Dnm3	Fam115a
	Pgpep1	Dtwd2
	Vmn2r81	Ubl3
	Rcn2	Itga9
	Fancl	2610002M06Rik
	Mrpl3	Itga7
	G3bp2	Pdha1
	Mre11a	Slc25a28
	Eaf2	Rtf1
	Ier2	Rbm4b
	Cand1	Zfp81
	Ccny	Abca2
	Pgap2	Pabpc4l
	Gins2	Uxs1
	Phb2	Gm6710
	Tmem194	Pou3f3
	Pes1	Smchd1
	Bcl7c	Sltm
	BC023829	Fam76b
	Marveld1	Polr2j
	Lck	Cmtm2b
	Ap4s1	Paox
	Bzw1	Gm5766
	BC026590	Pcif1
	Dgcr2	Eprs
	Cdc7	Kcnma1
	Lhfp	Smtnl2
	Nfib	Psma7
	Mcmbp	Tfdp2
	Zfp238	Ccdc41
	Nrbp2	Chi3l3
	Rnf157	Plagl1
	Mettl8	Pdxk-ps
	4930422G04Rik	Mycbp
	Mal	Aacs
	Pitpnb	Myo5a
	Stt3a	Cisd1
	Gm10069	Reep4
	Ehmt1	Gm9755
	Nfx1	Paqr8
	Coro1c	Glipr1
	Nop58	Rnf139
	Ppp1r8	Aldh16a1
	Ncoa6	Lztfl1
	Diablo	Tmem41a
	Eif2s1	Gm97
	Txnrd3	2310033P09Rik
	Rfc2	Fam184b
	Eif2s2	Wdr3
	Gramd1b	Bnipl
	Mthfr	Ankrd39
	Col5a1	Ebf2
	Phgdh	Ckap5
	Tcf7l1	Drosha
	Pabpn1	Mri1
	Gm6480	Eri3
	Cd53	Hyls1
	Gm6505	Pigyl
	Ppp2r1b	Dnmt3b
	Nrm	Tmem252
	Gm5884	Ywhaq
	Csnk2a2	Bsnd
	Itpa	Cwf19l1
	Ino80e	Phldb2
	Manba	Adam15
	Gyltl1b	Traf7
	Lin54	Atp8a1
	0610007P08Rik	Ddx50
	Surf2	Cetn4
	Chaf1b	Hsf1
	Hnrnpk	Gmppb
	Pde4dip	Il1rap
	Raf1	Llph
	Vezt	Cpped1
	Gatad2a	Tmem168
	Bcas2	Lmln
	Tmem214	Plscr3
	Aasdh	Kri1
	Impdh2	Ubr5
	Mlec	Brcc3
	Dsn1	Ddx19a
	Mapk12	Rock2
	Ermp1	Cnp
	Tpsg1	Prpf4
	Cdca3	RP24-170A20.3
	Gsta2	Chst14
	Pex12	Comtd1
	Zfp956	Scarb1
	Mrgprh	Olfr1193
	Srsf10	Eomes
	Cacna1g	Fance
	Zfp472	Adprhl2
	Cdc42ep1	Gnai3
	Tmem109	Mcpt8
	Nucks1	Fam123b
	Rad23b	Tpd52l1
	Gm13152	Rps28
	Pom121	Tlk1
	Vcan	Dazap1
	Seh1l	Zfp106
	Slc5a6	1700054N08Rik
	AC134826.1	Trp53bp1
	Rbm26	Paf1
	Hcfc1	Ppp1r35
	Nabp1	Thsd7b
	Nol9	Srcrb4d
	Cpsf6	Smpdl3a
	Tmem55a	Trerf1
	AW551984	Dcps
	Mis18a	Trpc4
	Sf1	Gm13227
	Ftsjd1	Nfyb
	Ddah1	Tead2
	Dhx15	Il19
	Irx5	Psma4
	Mt1	Exosc5
	Plekhj1	Trap1
	Khdrbs3	Ppp3cc
	Rif1	Parl
	Wdr67	Muc20
	Erf	Gpr156
	AI597468	Fam108b
	Akt1	4933411K20Rik
	Hnrnpul1	Taf9b
	Rpp30	Bod1
	Timm23	Bcat2
	Gphn	Rhot1
	Usp50	Reep5
	Csk	Agtr1b
	Ctcf	Tro
	Gtf2ird1	Timm44
	Tgfb1	Gale
	Chtop	Rpl34
	H2afz	6030458C11Rik
	Ccnh	Prkab2
	Gm6644	D3Ertd751e
	Pak4	Pfkfb1
	Tmx4	Rap1b
	Smarcc1	Rabl2
	Cherp	Hsp90ab1
	Trip6	2310009B15Rik
	Ankmy2	Gm5424
	Stmn3	Nfatc2ip
	Dtnbp1	Emc8
	Gin1	Pdia6
	Ipo5	Zdhhc16
	Cobll1	Zbtb8a
	Coq2	Afap1
	Rbm10	Prkdc
	Arid1a	Gm20715
	Wdr82	Pcbd2
	Snrpd3	Mkks
	Atp8b2	Mtmr11
	Rps6ka3	Dph3
	Lin9	Atg4a
	BC048355	Tenm1
	Fyb	Elof1
	Rad54b	Usp37
	Rbm25	Cox18
	Ssbp3	Tardbp
	Hps3	Sephs1
	Hnrnpa2b1	Duoxa1
	Polr3g	Paip2b
	Pole4	Fam120a
	Mrpl41	Tom1l1
	Steap1	Tdh
	Zfp146	Arhgef4
	Akr1b3	Naaa
	Dynll1	Trip10
	Ccdc99	Efemp2
	Arrdc3	Ids
	Creg1	Mrpl35
	Nab1	Slco1b2
	Mvk	Sft2d3
	Aars	Hmgn1
	Eif4g1	Tmem29
	Rwdd1	Cct2
	2410076I21Rik	Zfp148
	Nup155	Qrsl1
	Celf1	Phip
	Zc3h18	Trav1
	Ipo11	Kcnd2
	Ndufaf4	Spag7
	Gorasp2	U2surp
	Efnb2	Pcbp2
	Ankrd26	Vmn2r115
	Fkbp2	Cpsf3
	Trib3	Tubgcp6
	Krt19	Ccdc77
	Nuak2	Zscan22
	9430008C03Rik	Nup54
	4930503L19Rik	Rab14
	Mtdh	Gm4989
	Tcerg1l	AC139673.1
	P4ha1	Pafah1b1
	Adcy7	Chd1
	Wipf1	Lars
	Ptplad2	Mrp63
	Tubb4b	Hnrnpa0
	Dok1	Ccdc14
	Ergic1	Impa1
	Caprin1	Nup153
	Snx18	Gm7645
	5730528L13Rik	Atp6v0a1
	Jrk	Mto1
	Eif1a	Fam49b
	Taf15	Tpm4
	Batf3	Atp1a4
	Parp1	B4galnt4
	Ubqln2	Olfr33
	Cops3	Aebp2
	Gclm	Gid4
	Atp2b1	Ccdc15
	Prpf31	AC123687.1
	Bspry	Dzip3
	Tsc22d2	Cacna2d1
	Hnrnph3	Lphn2
	Ttc21b	Lrrc56
	Ldha	Gm11979
	Def8	Pim2
	Cinp	Gadd45gip1
	Acly	Psmc2
[truncated: 1,720 more rows]

## Sheet: Suppl Table 3  fig 8B
Supplemental Table 3 (used for Fig 8B)
shF1+3 48h only	shf1+3 48h & 72h	shf1+3 72h only
168 elements included exclusively in "sh 48h":	674 common elements in "sh 48h" and "sh 72h":	738 elements included exclusively in "sh 72h":
Btg2	Prl2c3	Adamts1
4930463O16Rik	Prl2c1	Pmaip1
Myo15b	Prl2c5	Ccl20
Adamts18	Mrc1	Cyr61
Sall4	Cxcl5	Plk2
Copz2	Cxcl1	Ptpn22
Gpr179	Cxcl2	Vegfc
Tmprss11e	Gsta2	St6galnac4
Pfas	Cox11	Rgs16
Oprm1	Pdk4	Chac1
Tmem40	Arhgef3	Sgk1
Fam167a	Slpi	Cxcl10
Prmt3	Herpud1	Nrg1
1700020I14Rik	Snord45b	Procr
Akap8l	Gm10639	Dlgap1
C030014I23Rik	Etaa1	Olfr1015
1600029D21Rik	Map3k8	Usp53
Ldlrap1	S100a7a	Ppp1r15a
Tas1r3	Tns3	Atf3
Mark3	Pxdn	Ubash3b
Pip5k1b	Edn1	Pglyrp3
Acat1	Sbno2	Nfil3
Skp2	Zc3h12a	Pik3r5
Ccdc82	Ivns1abp	Car13
Ybx1	Sesn2	Cpox
Ndrg1	Cdkn1a	Cspp1
Capns1	Gem	Papd4
Nanos1	Zfp9	Dusp4
Lamb3	Cdc42	3110043O21Rik
3110057O12Rik	Zfp867	Man1a
S100a11	Gm7278	Rnd1
Bok	Fgfr1op	Gadd45b
Hsp90b1	Lpin2	1110046J04Rik
Olfr691	Zfp367	Sh3bp5
Trim59	Dst	Anxa8
Ptcd3	Odc1	Zcchc7
Pithd1	Pip5k1a	Cth
Tpst2	Zeb2	Nt5dc3
Rpp38	Cfl2	Tm4sf1
Nt5e	Ginm1	Fosl1
Clasp2	Tm2d3	Serpind1
Yme1l1	Usp31	Tor3a
Ect2	Ampd3	Slc20a1
Sparc	Plekhb2	Bysl
Rab3ip	Pdpn	AC161460.3
Ets1	Ptgs2	Ctla2b
Tnnt2	Sdcbp2	Pla2g4a
Prpf38a	Slc7a11	Golim4
Ctnnbip1	Acaa1a	Grhl1
Ppig	Ap1s2	Serpinb5
4732471D19Rik	Itgb6	Flrt3
Akirin1	Dera	Insig2
Hook1	Lama3	Tank
Mknk1	Hspa4l	Ccbe1
Nsdhl	Hipk3	Dnajb4
Mtap6	Itsn2	Eea1
Taok1	Il11ra1	Asb13
Mrps7	Ier5	Hilpda
Exoc6	Nfkbia	2510049J12Rik
Atr	Apaf1	Pla1a
Fancd2	Sh2d5	Hspa9
Sgpl1	Prrg4	Adamts6
Rcbtb1	Orc1	2310030G06Rik
Rabgap1l	Slc1a1	Fgf21
Hddc2	Cast	Gnas
Tgfbr1	Map4k5	AC158295.1
Naa16	Snapc1	Lgals8
Cdc37l1	Cog2	Ugcg
Tmem5	Hmga2	Frmd4b
Gtf2ird1	Slc16a6	Ctla2a
Fktn	Rcan3	Wnt7a
Tmx3	Tug1	Ptpn13
Tia1	1700054N08Rik	Csnk1g3
Uhrf1bp1l	Rbfox2	Txnrd1
Ninl	Zc3h6	Tmem251
AC129605.1	Abtb2	Stk17b
Tlr3	Dusp7	Gsto2
Srsf7	Itgav	Ddx27
Gart	Pold3	Jdp2
Ibtk	Kpna3	Tmed5
Vapb	Daam1	Kdm1b
Ckap2	2310002L13Rik	Ccdc93
Zfp934	Cxcl16	Ctps
Mrpl16	Aggf1	Serpine1
Krt7	Hnrnpa1	Zfp184
Ereg	Ier3	Naa25
Arl15	Apbb2	Zadh2
Lonrf1	Slc12a4	Angptl6
Sdhd	Ppm1a	Msn
Gm5135	Aff4	Trim54
Atp2a2	Gls	Gch1
Pttg1	Med23	Mtmr7
Sap18	Tmco3	Prss46
Esf1	Mbtps2	Fam102b
Parpbp	Magi2	Aif1l
Ddx21	Plscr1	Haus6
Irs1	Zwint	Mettl22
Gnpda2	Epg5	Shroom3
Cenpa	P2rx4	Mphosph6
Mterfd1	9130008F23Rik	Atp2b1
Acsl5	Creb5	2810455O05Rik
Strn3	Ppp6c	Kif23
Arhgef5	Ddit3	Sh3bp5l
Isy1	Usp20	Rgs10
D730039F16Rik	Filip1l	Csnk1e
Mdm4	2010111I01Rik	Slc25a33
Gpm6b	Ifrd1	Coq10b
Rps7	Rbms1	Klhl22
Slc39a6	Creg1	Top1mt
Haus4	Tsc1	Klf9
Metrn	Dtx4	Zfp948
Elovl6	Dusp10	Hspa9-ps1
Pgrmc2	Cyth3	Lims2
5730528L13Rik	Gm12840	Dhx35
Alg13	Fndc3a	Acn9
Rhob	4930402H24Rik	Klf5
Heatr2	Tnfaip3	Frmd4a
Fam84b	Plk3	Sqrdl
E330009J07Rik	Pvr	Tbc1d9
Idi1	Wasl	Eif4ebp1
Dbf4	Myo10	Styk1
Sdpr	Ap2b1	Rras2
AC159129.1	Eif6	Cks2
Zc3hav1l	Ptpn14	Lars
Eif2s2	AI597479	2610301B20Rik
Ndufaf2	Tnrc6a	Chmp4c
Jag1	Il1a	Stard13
Fam64a	Slc25a25	Traf3
Phip	Pptc7	Tra2b
2210011C24Rik	Gtf2h1	Lmo7
Cldn12	Ppif	Trpm7
Nfkbie	Myof	Shcbp1
Gadd45a	Dusp9	Stx11
Ncl	Gpr137b	Uba3
Sbf2	Plscr2	P2ry12
Naa30	Prnd	Smyd3
Obsl1	Smurf1	H2-M3
Ddx10	Rab30	Lrp8
Rps20	Map3k9	Tmem130
Dhps	Nfkbiz	9630033F20Rik
Cds1	Dffa	Auh
Sh2d4a	Tom1l2	Ghitm
Cwf19l2	Otud4	Grpel2
Aff1	Atf6	Krt80
Trmt10a	Fxr1	Nupr1
Samd4	Dnajb9	Frmd5
Trnt1	Srpk2	Heatr1
Upk3bl	Fbxl3	Chmp2b
Foxj1	Abcc5	Mtor
Ank3	Tmem248	Cd99l2
9930023K05Rik	2010-09-01	BC016423
5730508B09Rik	Rusc2	Josd1
Pak3	Asb4	Mum1l1
Fam118a	Adprh	Krit1
Slc4a4	Wdyhv1	Ptpla
L3hypdh	Tfrc	Pcm1
Mrpl36	Polr1c	Pla2g15
Lactb	Fermt1	Bloc1s6
Gemin6	Ngf	Stxbp5
Apln	Ptgr2	Tmem180
Gm6644	Tfb1m	Usp22
Akr1b3	Caprin1	Ttc14
Axl	Pkia	Hipk1
Trib3	Lrrc58	Nip7
Rnf138	Srcap	Zfp655
Endod1	Maff	Ubr2
Csf2ra	Antxr2	Hus1
Afp	Tor2a	Rhbdd1
Vgll3	Vgll3	Fbln2
Hgsnat	Hgsnat	Ipo7
Polr1a	Polr1a	Otud7b
Ctsc	Ctsc	Vcam1
Pld2	Pld2	Cdc25a
Zxdc	Zxdc	Fgd3
Sh3bgrl2	Sh3bgrl2	Phf3
Ankrd1	Ankrd1	C330007P06Rik
Osgin1	Osgin1	Spns2
Socs3	Socs3	Yrdc
Spag9	Spag9	Arhgap22
Fbxo11	Fbxo11	Fem1b
Rlim	Rlim	Psip1
Ccbl2	Ccbl2	Phldb2
Clcn5	Clcn5	Zfp295
Cxcl3	Cxcl3	Areg
Mthfd2	Mthfd2	Nagk
Sat1	Sat1	Ppp1r12b
Dock5	Dock5	Anapc1
Fam82a2	Fam82a2	Rwdd1
Ubxn7	Ubxn7	Gabpb1
1190005I06Rik	1190005I06Rik	Gng5
Fam179b	Fam179b	Zc3hav1
Cnpy4	Cnpy4	Scg5
Cdv3	Cdv3	Cat
Hdac6	Hdac6	Nudt18
Mmp14	Mmp14	Usp15
Slc4a7	Slc4a7	Spop
Prkacb	Prkacb	Slc25a19
Utp3	Utp3	Mafk
Efr3a	Efr3a	Mob1a
Cdkn3	Cdkn3	Nusap1
Scd1	Scd1	Necap1
Thsd4	Thsd4	Ankrd17
Capn7	Capn7	Mcf2l
Sh2b3	Sh2b3	Cdkl2
Snhg3	Snhg3	1500011K16Rik
Sema4d	Sema4d	Ankrd24
Spa17	Spa17	Oit3
Ash2l	Ash2l	Usp46
Abi1	Abi1	Ip6k2
Plscr4	Plscr4	Ndel1
Terf2ip	Terf2ip	Dnajc5
Adarb1	Adarb1	Hmmr
Gpatch2	Gpatch2	Slc2a9
Uck2	Uck2	AC147987.1
Qk	Qk	Chd9
Tmem161b	Tmem161b	Kctd6
Sppl2a	Sppl2a	Wipf1
Tuba8	Tuba8	Pikfyve
Atp1a1	Atp1a1	Sec24d
Zfp148	Zfp148	Ccdc15
Fuk	Fuk	Marveld2
Arl5b	Arl5b	Ttc37
Rcbtb2	Rcbtb2	Cttnbp2nl
Reep3	Reep3	Fastkd1
Gcsh	Gcsh	Nlk
Bst1	Bst1	Ccdc88a
Rapgef6	Rapgef6	Slc35e3
Zfp451	Zfp451	Papola
Idh1	Idh1	Mtss1
Sqle	Sqle	Zfp36
Stk24	Stk24	Tbc1d2
Strbp	Strbp	Nadk
Trak2	Trak2	Snupn
Ahnak	Ahnak	Got1
2310008H09Rik	2310008H09Rik	Rtn4r
Ube2q1	Ube2q1	Col4a3bp
Insr	Insr	Rwdd3
Gstcd	Gstcd	H1fnt
Jarid2	Jarid2	Cnnm4
Ppp1ca	Ppp1ca	Jagn1
Pole4	Pole4	Trub1
Pdcd6ip	Pdcd6ip	Atp10d
Gxylt1	Gxylt1	Tspan12
Rpl13	Rpl13	A230046K03Rik
Gm11507	Gm11507	Cmtm3
Rdx	Rdx	Plin2
Peli1	Peli1	Nbea
Rrbp1	Rrbp1	Trip13
Atl3	Atl3	Gab3
Tbrg4	Tbrg4	Wdr37
R3hdm1	R3hdm1	Mmd
Acvr2a	Acvr2a	Ikbkb
Ndufaf3	Ndufaf3	Fam135a
Rbm47	Rbm47	Lins
Rangrf	Rangrf	Ube2w
Zc3h4	Zc3h4	Cytl1
Trim2	Trim2	Ddhd1
Zfand3	Zfand3	Aars
Psmc1	Psmc1	Isca2
Agl	Agl	Uap1
Smap2	Smap2	Hax1
Asph	Asph	BC057079
Hnrpdl	Hnrpdl	Lztr1
Mycbp2	Mycbp2	Osbpl1a
Myh9	Myh9	Atxn2l
Ppp3cc	Ppp3cc	Vat1
Mrps18c	Mrps18c	Phf20l1
Ltbr	Ltbr	Suox
Rsrc1	Rsrc1	Bmp2k
Slc1a5	Slc1a5	Unc45a
Bcl2	Bcl2	Ppil1
Paip1	Paip1	Gpt2
Arhgap18	Arhgap18	Cd2ap
Pygo2	Pygo2	Ppef2
Acaa1b	Acaa1b	Tpm4
Slc11a2	Slc11a2	Plekho2
Acap2	Acap2	Snn
Klhdc10	Klhdc10	Cdr2l
Nfya	Nfya	Nuf2
Rictor	Rictor	Btg3
Agfg1	Agfg1	Mt2
Ints12	Ints12	Tiparp
H1f0	H1f0	Pgm1
Ltbp3	Ltbp3	Pgs1
Serinc3	Serinc3	Cdh18
Tuba4a	Tuba4a	Pitrm1
2210408I21Rik	2210408I21Rik	Csgalnact2
Fzd2	Fzd2	2610001J05Rik
Macf1	Macf1	2410042D21Rik
AK010878	AK010878	Tmem120a
Snx25	Snx25	Car12
Tceb3	Tceb3	Aim1l
Bfar	Bfar	Abcc4
Traf6	Traf6	Drd2
H2-T22	H2-T22	Tec
Srsf10	Srsf10	Prmt7
Dhcr7	Dhcr7	Kbtbd3
Fgfbp1	Fgfbp1	Amd-ps3
Lin54	Lin54	Klf6
Casp2	Casp2	Ccdc109b
Bahcc1	Bahcc1	Ap2a2
Ddah2	Ddah2	Lpar2
Mrpl49	Mrpl49	Cdc42ep3
Phf14	Phf14	Gm13743
Papss1	Papss1	Slamf9
Klhl20	Klhl20	Sash1
Coa5	Coa5	Stxbp1
Lta4h	Lta4h	Myc
Clock	Clock	Adam8
Rnf170	Rnf170	Lyplal1
Clu	Clu	Sqstm1
Galk2	Galk2	Dhx15
Paip2b	Paip2b	Lrrfip1
Edem1	Edem1	Rap1b
GM20091	GM20091	Kctd3
Als2	Als2	Gm13157
Stk38	Stk38	B4galt2
Dcun1d1	Dcun1d1	Acsl1
Hspa1b	Hspa1b	Id1
Morc4	Morc4	Clk1
Eno3	Eno3	Abhd5
Larp4b	Larp4b	Gm9797
Pdia4	Pdia4	Prkx
Srm	Srm	Cdt1
Nmt1	Nmt1	Pus10
Acadsb	Acadsb	3110082I17Rik
Ube3a	Ube3a	Sos1
Polr2e	Polr2e	Nkiras1
Pkd2	Pkd2	Gabarapl1
Mbtd1	Mbtd1	Trim37
H2afx	H2afx	Adam9
Cyld	Cyld	Cinp
Tmco1	Tmco1	Baz1a
Cpne1	Cpne1	Ypel5
Acly	Acly	Fam35a
Wrb	Wrb	Rpp40
Pigg	Pigg	Dock8
Ubxn2a	Ubxn2a	Tars
Prkaa1	Prkaa1	E130308A19Rik
Ctdspl2	Ctdspl2	Madd
Atl2	Atl2	Tgif1
Cyp51	Cyp51	Amd-ps4
Tmem127	Tmem127	Prr13
Utp15	Utp15	Prkrir
Dph3	Dph3	Ralgapb
Ifngr1	Ifngr1	Lyn
Pomgnt1	Pomgnt1	Papd7
Med19	Med19	Bcas2
Fam109a	Fam109a	Ddx19b
2310045N01Rik	2310045N01Rik	Tmem65
Zfp808	Zfp808	Nhlrc3
Cbl	Cbl	Pcyt1a
Ecscr	Ecscr	Srebf2
2900026A02Rik	2900026A02Rik	Vamp4
Xpo6	Xpo6	Rexo2
Cpeb4	Cpeb4	Eif2c2
Ssr3	Ssr3	Eprs
Isg20l2	Isg20l2	Psph
Mgat4b	Mgat4b	Cad
Slc5a3	Slc5a3	Jun
Ctnnal1	Ctnnal1	4930486L24Rik
Vdac2	Vdac2	Uqcrq
Pten	Pten	Nus1
Gemin8	Gemin8	Glce
Agpat4	Agpat4	Cxadr
Cenpw	Cenpw	Ralgps1
Lmo4	Lmo4	Mtfmt
Hsd17b7	Hsd17b7	D6Wsu116e
Tuba1a	Tuba1a	Sepsecs
Ankrd11	Ankrd11	Uba6
Cc2d1b	Cc2d1b	Syne2
Pitpna	Pitpna	Gtpbp2
Hip1	Hip1	Ikbkap
Klhl21	Klhl21	Cenpi
E130309D02Rik	E130309D02Rik	Stbd1
Gtpbp3	Gtpbp3	C230081A13Rik
C78339	C78339	Dnajb2
Lhfp	Lhfp	Cald1
Ccnd1	Ccnd1	2410076I21Rik
Trak1	Trak1	Iars
Sox11	Sox11	Ppan
Exosc8	Exosc8	Crem
Nek6	Nek6	Stradb
Psma3	Psma3	B630005N14Rik
Pign	Pign	Ccng1
Pou2f1	Pou2f1	Klhl15
Gm17296	Gm17296	Htt
Hadh	Hadh	Cox18
A830082K12Rik	A830082K12Rik	Relb
Ly6i	Ly6i	Hnf1b
Bag2	Bag2	Letmd1
Ube2v2	Ube2v2	Secisbp2
Elavl4	Elavl4	Fndc3b
Snx24	Snx24	Rabgef1
Sys1	Sys1	Tyw1
Ramp1	Ramp1	Whsc1
Os9	Os9	Tmem238
Hira	Hira	Gm5331
Rnf181	Rnf181	Plxnb1
Slc22a29	Slc22a29	Smc2
Rprd2	Rprd2	Agbl3
Dlg5	Dlg5	BC029214
Armc1	Armc1	Olfr332
Cdk19	Cdk19	Mttp
Acer3	Acer3	Hmgn5
Mob3b	Mob3b	Slc15a2
Cyb5d1	Cyb5d1	Mthfsd
Macc1	Macc1	Cstf2
Smad5	Smad5	Efemp2
Chst12	Chst12	4933426M11Rik
Atxn1l	Atxn1l	Dda1
Gng12	Gng12	Bora
Adh7	Adh7	Rnf114
Mtap	Mtap	Dalrd3
Bnc1	Bnc1	Tbc1d19
Rnf103	Rnf103	Polr3f
C77080	C77080	Araf
Calm1	Calm1	Pdha1
Fam117b	Fam117b	2210016F16Rik
Hs6st1	Hs6st1	Fuca1
Gja1	Gja1	Lad1
Mdfic	Mdfic	Nr3c1
Arpc1b	Arpc1b	Cd81
Sirt1	Sirt1	Rpn1
Acsl3	Acsl3	Rfxank
Scx	Scx	Cisd2
Casp9	Casp9	Zfp326
Ikzf5	Ikzf5	Tuba3a
Epha1	Epha1	Mllt3
Mapk13	Mapk13	Ptgs1
Aftph	Aftph	Mgst1
Eif4g2	Eif4g2	Psapl1
Gosr1	Gosr1	Oaf
Grlf1	Grlf1	Nap1l1
Ppp1r7	Ppp1r7	Tapt1
Akap11	Akap11	Cmtm8
Fst	Fst	4930538K18Rik
Rpl22	Rpl22	Dnajc16
Btbd10	Btbd10	Gm15204
Ppm1b	Ppm1b	Hist1h2af
Cdk7	Cdk7	Suv420h1
B230118H07Rik	B230118H07Rik	Gm9670
Wdfy3	Wdfy3	Fam171a1
Cdkn2b	Cdkn2b	Zdhhc17
Cdc6	Cdc6	Ndufb9
Me1	Me1	Zfp605
Hmbs	Hmbs	Foxn2
Rcn2	Rcn2	Lrpprc
Atxn7l3b	Atxn7l3b	Olfr166
Slc16a1	Slc16a1	Agpat2
Uba1	Uba1	Agpat6
Tmem109	Tmem109	Emp1
Ddx54	Ddx54	Rsf1
Lass6	Lass6	Plxna1
Cs	Cs	Lypd3
Cables2	Cables2	Ykt6
Cyb5r1	Cyb5r1	Ifi30
Nab1	Nab1	B3gnt3
Laptm4b	Laptm4b	Gpr108
Anapc11	Anapc11	Cdh16
Hmg20a	Hmg20a	Dpp8
Enpp4	Enpp4	Rin3
Zzz3	Zzz3	Med14
E2f7	E2f7	Prdx2
Cct8	Cct8	Vps54
Mtap1b	Mtap1b	Srsf1
Arhgef12	Arhgef12	Pip5k1c
Fhl2	Fhl2	Hist2h2ac
Ssh1	Ssh1	Abcb6
Hells	Hells	Wdr13
Ube2e3	Ube2e3	Larp7
Zmym4	Zmym4	Map3k14
5730409E04Rik	5730409E04Rik	Fam134c
Fam105b	Fam105b	Ccdc88c
Mpzl3	Mpzl3	Bin3
Thbs1	Thbs1	Seh1l
Mknk2	Mknk2	Eml3
Fzd6	Fzd6	Ier5l
Prkaca	Prkaca	Lipt2
Arid2	Arid2	Gucy1b2
Cox7c	Cox7c	Emp2
Ctbp1	Ctbp1	Ttpal
Psca	Psca	Skap2
Trac	Trac	Ints10
Fam199x	Fam199x	AC099930.1
Camsap1	Camsap1	AI314180
2700089E24Rik	2700089E24Rik	Cbr1
Vangl2	Vangl2	Ccdc126
Glrx2	Glrx2	Tmem158
Tuba1c	Tuba1c	Ube2b
Tcea1	Tcea1	BC017158
Rad54l	Rad54l	Dgat1
Traf4	Traf4	Dlx4
Tmem20	Tmem20	C87436
Ankrd13c	Ankrd13c	Taf8
Dab2ip	Dab2ip	Gbp9
1200011I18Rik	1200011I18Rik	Osbpl3
Sephs1	Sephs1	Gm10229
Cep164	Cep164	Srsf6
Aim1	Aim1	Wdr6
Sertad4	Sertad4	Dapk2
Mest	Mest	Hist1h2aa
Rab1b	Rab1b	Rps6ka5
Qser1	Qser1	Kbtbd8
Spopl	Spopl	Hist2h2aa1
Trps1	Trps1	Tmem63a
Slc7a6	Slc7a6	Ccny
Ugt1a6a	Ugt1a6a	Chfr
Gabpa	Gabpa	Tada1
Paqr5	Paqr5	Ttc39b
Phf15	Phf15	Foxa3
Setd2	Setd2	Lrr1
Fam69a	Fam69a	Gm608
Atxn3	Atxn3	Srsf2
4931406C07Rik	4931406C07Rik	Crbn
Phf6	Phf6	0610011F06Rik
Tcf19	Tcf19	Mthfd2l
Dph3b-ps	Dph3b-ps	Ak2
Zdhhc20	Zdhhc20	Ccdc92
Lpgat1	Lpgat1	4930519F09Rik
Prkca	Prkca	BC048507
Map1lc3b	Map1lc3b	Ak4
Plk1s1	Plk1s1	Cd320
Slc25a11	Slc25a11	Lbr
Ryk	Ryk	Lyrm2
Pcyox1	Pcyox1	Cenpm
Acy1	Acy1	Rap2a
Lrba	Lrba	Tsc22d1
Rpl9	Rpl9	Zfp62
Denr	Denr	Grhpr
Rab2a	Rab2a	Gm13594
Tmem60	Tmem60	Pik3r3
Acox2	Acox2	Ube2i
Arfgef1	Arfgef1	Ddx5
Ly6f	Ly6f	Tmem98
Nin	Nin	Slc7a1
Plagl2	Plagl2	Nfix
Notch2	Notch2	Pfkm
Rhobtb3	Rhobtb3	Hist3h2a
Aqp5	Aqp5	Tstd2
Ccne2	Ccne2	H2afy
Zbtb41	Zbtb41	Fam32a
Cbx1	Cbx1	Suv39h1
Gm11488	Gm11488	Scrn3
Setd8	Setd8	Rps6ka3
Metrnl	Metrnl	Epn2
Zfp740	Zfp740	Stau2
Abhd13	Abhd13	Tbc1d9b
Inhbb	Inhbb	Stom
Csnk2a2	Csnk2a2	Msl1
Ppp1r12a	Ppp1r12a	Ubn2
Ssx2ip	Ssx2ip	Podxl
Vamp7	Vamp7	Map2k6
Nolc1	Nolc1	Slc2a1
Dusp11	Dusp11	Nav1
Sertad2	Sertad2	2310009B15Rik
Nepn	Nepn	Kcnk7
Crlf3	Crlf3	Hmgn2
Rps16	Rps16	Ugp2
Yipf6	Yipf6	Ifitm2
Faf2	Faf2	Pde10a
Nkap	Nkap	Idh2
Dlg3	Dlg3	Ndufab1
Klra4	Klra4	Slc35b2
Tulp4	Tulp4	Tbce
Abcd4	Abcd4	Fam188a
Nomo1	Nomo1	Gli3
Ldlr	Ldlr	Car5b
Tprgl	Tprgl	2006-03-01
Gar1	Gar1	Ap1m2
Cdca7l	Cdca7l	Tspan3
Gne	Gne	Psmf1
Cox15	Cox15	Nrm
Eif5	Eif5	Slco2a1
Zcrb1	Zcrb1	Gm7125
Poc1b	Poc1b	Rbpj
Igfbp4	Igfbp4	Pkhd1
Cbfb	Cbfb	Hnrnpd
Prss23	Prss23	Hist1h2ak
Exoc8	Exoc8	Ticrr
Nxpe3	Nxpe3	Thrap3
Ankrd49	Ankrd49	E2f5
Rpl22l1	Rpl22l1	Wac
Dnaja4	Dnaja4	Gm6985
L2hgdh	L2hgdh	Olfr802
Klra1	Klra1	Ifitm3
Ndufv2	Ndufv2	Cgnl1
Alg14	Alg14	Rb1cc1
Enox2	Enox2	Rprd1a
Ly6c1	Ly6c1	Nab2
Rpl38	Rpl38	Tnk1
Gfm1	Gfm1	Rbp1
Ly6c2	Ly6c2	Ltbp1
Mib1	Mib1	Ssbp3
Mllt1	Mllt1	S100a10
Tmem18	Tmem18	Ifitm7
Ier3ip1	Ier3ip1	Naa40
Fam164a	Fam164a	Spsb4
Glo1	Glo1	Ppl
Fam49b	Fam49b	Ap4m1
Rhpn2	Rhpn2	Znrf1
Znhit1	Znhit1	Tpm2
Lcorl	Lcorl	Padi4
Marcksl1	Marcksl1	Arih1
Tmem125	Tmem125	Elmod2
Terf1	Terf1	Hist1h2ao
Ly6a	Ly6a	Prkcdbp
Cav1	Cav1	0610007P08Rik
Neu1	Neu1	Pafah1b1
1700016C15Rik	1700016C15Rik	Timp1
4930420K17Rik	4930420K17Rik	Mbd5
Ramp2	Ramp2	Zfml
Grsf1	Grsf1	Plekha8
Ptpn4	Ptpn4	Hpcal1
2010002N04Rik	2010002N04Rik	Fam176b
Tmx1	Tmx1	Cdc26
Foxo1	Foxo1	Irf2bp2
Nat15	Nat15	Ppme1
Galnt3	Galnt3	Hspa4
Fam116a	Fam116a	Suds3
Fads3	Fads3	Vsig10
Spp1	Spp1	Plcg2
Zfp238	Zfp238	Hist1h2ai
Ncoa7	Ncoa7	Phf21a
Scd2	Scd2	Wbp1
Rrn3	Rrn3	Mgst3
Ormdl1	Ormdl1	Gbp8
Kpna6	Kpna6	Parp9
2002-09-01	2002-09-01	Ano8
Txlng	Txlng	Rxra
Gm14296	Gm14296	Sgms2
Pip4k2a	Pip4k2a	Jhdm1d
Arhgap19	Arhgap19	Mosc2
Emc10	Emc10	Dynll1
Pdk1	Pdk1	Rpgrip1l
Spg20	Spg20	Hmgn1
Snx12	Snx12	Klhdc5
Pno1	Pno1	Abcf2
D2Ertd750e	D2Ertd750e	Hgfac
Nras	Nras	Zfp672
Def6	Def6	Zfp324
Phospho2	Phospho2	Sumf1
Taf13	Taf13	Nfat5
Chsy1	Chsy1	Sfpq
Vamp3	Vamp3	Glyr1
Ptp4a1	Ptp4a1	Serinc2
Fam162a	Fam162a	Prss27
Aqp1	Aqp1	Krcc1
9230110C19Rik	9230110C19Rik	Zfp362
Ap4s1	Ap4s1	Zkscan1
Slc25a16	Slc25a16	Mxra8
Arnt	Arnt	Cwh43
Riok3	Riok3	P4ha1
Afap1l2	Afap1l2	Tial1
Slc35a3	Slc35a3	Lgr6
Synj2bp	Synj2bp	Sms
Tab3	Tab3	Map2k3
Met	Met	Rapgefl1
Id2	Id2	Sik3
Akt3	Akt3	Trerf1
Gpn1	Gpn1	Dag1
Ptgfrn	Ptgfrn	Slfn9
Xpr1	Xpr1	Helz
Cdkn2d	Cdkn2d	Ddx46
Gm12111	Gm12111	Slc7a7
Dnajb11	Dnajb11	Bcl2l11
Zmat3	Zmat3	Nipal2
Impad1	Impad1	Ngly1
Snx7	Snx7	Bnipl
Amfr	Amfr	Samd9l
Rc3h1	Rc3h1	Cx3cl1
Tmem50b	Tmem50b	Ubxn8
Cks1b	Cks1b	Epb4.1l4b
Cycs	Cycs	Bbip1
		Hexim1
		Tpcn1
		Spn
		Fabp3
		Banp
		Eml1
		Lrrc56
		Trib2
		Ehd2
		Tmub2
		Rps12
		Ptgds
		Pcolce
		Tnfrsf1b
		2610301G19Rik
		Aldoa
		Lrrc26
		Aldoart2
		Vdr
		Ahcyl2
		Slc44a3
		Tra2a
		Tmem176b
		Cotl1
		BC096441
		Txnip
		Bnip3
		B9d1
		Igf2bp1
		Bicd1
		Cdkn2a
		Psd3
		Thap2
		Nqo1
		Rai1
		Arrdc4
		Etl4
		1700026L06Rik
		Tmem176a
		Marcks
		Dido1
		Gstm3
		Nr2f1
		Mybpc2
		Klra8
		Tgfb3
		Lcn2
		Dmpk
		Mgst2
		Fxyd3
		Rom1
		Gstm1
		Egr1
		Eya2
		Tspan1
		Klra7
		Crabp2
		Phyhd1
		Glod5
		Bmf
		Wdr72
		Arrdc3
		Aldh3a1
		Mgp

## Sheet: Suppl Table 3  fig 8C
Supplemental Table 3 (used for Fig 8C)
36 elements included exclusively in "shFOXO 48h":	185 elements included exclusively in "shFOXO 72h":	307 elements included exclusively in "F3A3 8h":	2668 elements included exclusively in "F3A3 16h":	3018 common elements in "F3A3 8h" and "F3A3 16h":	180 common elements in "shFOXO 48h" and "shFOXO 72h":	324 common elements in "F3A3 8h", "F3A3 16h" and "shFOXO 72h":	298 common elements in "F3A3 8h", "F3A3 16h", "shFOXO 48h" and "shFOXO 72h":	25 common elements in "f3a3 8h", "sh 48" and "sh72":	171 common elements in "F3A3 16h", "sh 48" and "sh72":	78 common elements in "f3a3 8h", "F3A3 16h" and "sh 48":
Oprm1	Ccl20	Mfap3l	Oasl2	Ctgf	Prl2c3	Sgk1	Edn1	Fam69a	S100a7a	Gadd45a
Akap8l	Cyr61	Dock4	Ifit1	Cited2	Prl2c1	Slc7a7	Ptgs2	Stk24	Nfkbia	3110057O12Rik
C030014I23Rik	St6galnac4	Maf	Rtp4	Rab3b	Prl2c5	Ptpn22	Cxcl3	Rbm47	Zc3h12a	Tmprss11e
Ldlrap1	Rgs16	Gnb4	Ifit3	Mmp13	Slpi	Sash1	Vgll3	Xpr1	2310045N01Rik	Ndrg1
Tas1r3	Procr	Fam107b	Apol9b	5031410I06Rik	Herpud1	Mgp	2310002L13Rik	Wdfy3	4931406C07Rik	Btg2
Lamb3	Pglyrp3	Aspa	I830012O16Rik	Ifnk	Gem	Chac1	Map1lc3b	Fam117b	Snapc1	1600029D21Rik
Olfr691	Pik3r5	D830044D21Rik	Ccl9	Gm7361	Gm7278	Tmem158	Map3k8	Paqr5	Lama3	Sdpr
Rab3ip	Car13	Klra2	Oas2	Speer4b	Cfl2	Etl4	Pdk4	Smad5	Myof	Exoc6
Tnnt2	Cspp1	Egr2	Hist1h1c	Gm15298	Tm2d3	Slc15a2	Sdcbp2	Laptm4b	Ssh1	Gnpda2
Prpf38a	Papd4	Tmem70	Trim30a	Ccpg1	Pdpn	4933426M11Rik	Rusc2	Slc12a4	Plekhb2	Upk3bl
4732471D19Rik	Serpind1	Mtmr10	Repin1	Crebl2	Ap1s2	Jhdm1d	4930420K17Rik	Trak1	Chst12	Ibtk
Akirin1	Pla2g4a	Tmco6	Oas1a	Gm11815	Hspa4l	Man1a	Acadsb	Eif6	Dera	1700020I14Rik
Taok1	Golim4	Eps8l3	RP23-404J7.3	Nfe2l3	Prrg4	Ppp1r15a	Clu	Met	Ly6a	D730039F16Rik
Cdc37l1	Serpinb5	Gm13416	Oas1b	1110018J18Rik	Cog2	Cwh43	Cxcl1	Adarb1	Plscr1	Arhgef5
Tmem5	Flrt3	Cyp26c1	Csdc2	Trp53inp1	Rbfox2	Ctla2b	Hmga2	Dnajb9	Klhl21	Ets1
Fktn	Dnajb4	Fut8	Igtp	Cpeb2	Zc3h6	Ctla2a	Ier5	Usp20	Ecscr	Nfkbie
Tia1	Pla1a	Txk	Rragb	Tcp11l2	Kpna3	AC161460.3	Cdkn2b	Bfar	Bst1	Uhrf1bp1l
Ninl	Adamts6	Wdsub1	Isg15	Il17rd	Daam1	Stradb	Afap1l2	Tmem248	Fhl2	Sh2d4a
AC129605.1	Fgf21	Fam193b	Apol9a	Fam110c	Aggf1	Suds3	Ncoa7	Zfp451	Myo10	Pttg1
Sdhd	Lgals8	Wwp1	Gvin1	Pink1	Mbtps2	4930486L24Rik	Smap2	Denr	Ly6f	Rabgap1l
Gm5135	Wnt7a	Nipbl	Muc16	4930519F16Rik	Magi2	Egr1	Cxcl5	Hspa1b	9130008F23Rik	Sparc
Mterfd1	Tmem251	AL935177.3	Trim30d	Fn1	Ppp6c	Sgms2	Spa17	Gtf2h1	Cpeb4	Pip5k1b
Strn3	Zfp184	Nek7	Irgm2	Abcb1a	Ddit3	Bbip1	Mdfic	Gtpbp3	Smurf1	Axl
Gpm6b	Angptl6	Accs	Irf7	Vwa5a	Ifrd1	Ugcg	Tprgl	Exoc8	Tmem50b	Ptcd3
Rps7	Shroom3	Uhrf2	Irgm1	Efhd1	Gm12840	Rb1cc1	Rnf103	Prkca	Tns3	Eif2s2
AC159129.1	Klf9	Inpp1	Trim25	Myo16	Plk3	Vegfc	Dst		Gls	Gtf2ird1
Cldn12	Dhx35	Btc	Aloxe3	Gm15145	Ap2b1	Tec	Epg5		Gpatch2	Gm6644
Naa30	Trpm7	Dsel	Gm1966	Cytip	AI597479	Klf6	Serinc3		Ier3	Akr1b3
Ddx10	Ghitm	Map3k5	Uchl1	Tmem140	Tnrc6a	Sqstm1	Fam109a		Atf6	Trib3
Dhps	Krt80	Rasgef1b	Ifih1	Gjc1	Slc25a25	Hipk1	Cav1		Pip5k1a	5730528L13Rik
Cwf19l2	Josd1	Spice1	Irf9	Sema7a	Dusp9	Chmp4c	Pvr		Rnf181	Tgfbr1
Trnt1	Mum1l1	Zfp959	Oas3	Rdh10	Gpr137b	Gabarapl1	Gm11507		Tulp4	Mtap6
Pak3	Pla2g15	Lrwd1	Oas1c	Sesn3	Dffa	Prr13	Fndc3a		Phospho2	Pithd1
Fam118a	Stxbp5	Sdc4	Ifi27l1	Hbegf	Ptgr2	Mgst1	Rictor		P2rx4	Mrpl36
Lactb	Tmem180	Slc10a2	Ifi35	Foxp1	Lrrc58	Cttnbp2nl	Insr		Ampd3	Parpbp
Afp	Usp22	Ift80	Herc6	Nyap1	Pld2	Eif4ebp1	C78339		H2-T22	Sbf2
	Phf3	Ddb2	Oas1f	Ank	Fbxo11	Arhgap22	Maff		Aff4	Nsdhl
	C330007P06Rik	A930018M24Rik	Ccl6	Erbb3	Ccbl2	Gsto2	Atl3		Dusp11	Atp2a2
	Spns2	Armcx5	Ranbp2	Pla2g16	Sat1	Phf21a	Plscr4		Glrx2	Esf1
	Fem1b	Nptn	Sbsn	Zfand2a	Fam179b	Tsc22d1	Rprd2		Aftph	Metrn
	Zfp295	Btbd7	Vmn1r201	Rnase4	Cnpy4	Zfp655	Stk38		Plscr2	Fancd2
	Nudt18	Cdon	9130409I23Rik	Sesn1	Hdac6	Bmf	Cast		Faf2	Rcbtb1
	Slc25a19	Mfsd7a	Crygn	Sec23a	Mmp14	Plk2	Ppm1b		Tnfaip3	Ncl
	Mob1a	Gm15731	BC006779	Calcb	Prkacb	Mxra8	Cxcl2		Tug1	Zc3hav1l
	Ankrd17	Mterfd3	Gstt4	Cd14	Utp3	Drd2	Prkaa1		Paip1	Heatr2
	Cdkl2	1700025K23Rik	Sec14l4	Rfk	Sema4d	Clk1	Fbxl3		Ptpn14	Hsp90b1
	Ankrd24	Gnpnat1	Eif2ak2	Galntl2	Ash2l	Rpgrip1l	Arhgef12		Rab2a	Arl15
	Oit3	Top2b	Gbp4	Slc12a1	Terf2ip	Cat	Dusp10		Tom1l2	Rpp38
	Slc2a9	Vrk3	Cmpk2	Cyp4v3	Tmem161b	Chfr	Trps1		Tceb3	Ddx21
	Kctd6	Tle1	Atp6v0a2	Pik3ip1	Fuk	Glod5	Lpin2		Itsn2	Fam64a
	Pikfyve	Gpr124	Pof1b	Serinc5	Rapgef6	Tgif1	Otud4		Capn7	Trim59
	Mtss1	Slc30a9	Gm3053	Scel	Trak2	Tmem98	Riok3		Cdkn1a	Cds1
	Tbc1d2	Kctd18	Lamp2	Gm20618	Ahnak	Usp53	Itgav		Cyb5d1	Trmt10a
	Cnnm4	Mrpl34	Scpep1	Card6	Jarid2	Insig2	Srpk2		Atxn1l	Acsl5
	Cmtm3	Nme7	Bnip3l	Slc40a1	Ppp1ca	Lmo7	Il1a		Acaa1a	Zfp934
	Gab3	Pigb	Npc2	Tlr2	Zc3h4	Ypel5	Agpat4		C77080	2210011C24Rik
	Ikbkb	Casp6	Fth1	P2rx7	Trim2	H1fnt	Fermt1		Nfkbiz	L3hypdh
	Fam135a	Rpia	Ddx60	Calcoco1	Psmc1	Ube2b	Arid2		Acvr2a	Jag1
	Isca2	Ncald	Casc1	Slc17a5	Mrps18c	Tm4sf1	Thsd4		Map3k9	Tpst2
	Hax1	Otud1	Acad10	Kank1	Bcl2	Spop	Akt3		Slc35a3	Idi1
	Lztr1	1110037F02Rik	Ccl5	Mxd4	Pygo2	Csgalnact2	Zwint		Cbl	Prmt3
	Osbpl1a	Clcn3	Rsad2	Ttc5	Acap2	Uba6	Sertad2		Vangl2	Slc4a4
	Suox	Zfp420	Ide	Tktl1	Klhdc10	Styk1	Ankrd13c		Il11ra1	5730508B09Rik
	Bmp2k	Slc12a2	Uba7	BC022687	2210408I21Rik	Lims2	Cdk19		Mtap	Rps20
	Ppef2	Lancl2	Itgam	Rab11fip1	Macf1	Zdhhc17	Atxn3		Ints12	Pgrmc2
	Plekho2	Arntl	Zfp36l1	Mustn1	AK010878	Tiparp	Dtx4		Acaa1b	Ppig
	Btg3	Ptplb	Stat1	Ube2h	Traf6	Coq10b	Ginm1		1200011I18Rik	Pfas
	Mt2	Ppp4r1l-ps	Map1lc3a	Kank3	Fgfbp1	Fgd3	Rbms1		Ltbp3	Bok
	Pgm1	Mrps31	Adar	Hspb1	Casp2	Myc	Vamp7		Metrnl	Naa16
	Cdh18	Fam65c	Cartpt	2410066E13Rik	Phf14	Unc45a	Ubxn2a		Odc1	Mrps7
	Pitrm1	Mtfr1	Pdzk1ip1	Sh3yl1	Papss1	Rfxank	Hipk3		2010111I01Rik	Ctnnbip1
	Tmem120a	Tjp2	Nckap1l	Ccdc66	Coa5	Cd2ap	Sh3bgrl2		Grsf1	Srsf7
	Abcc4	Lmx1a	Ifi44	Neat1	Clock	Smyd3	Itgb6		Zfp740	Skp2
	Kbtbd3	Them4	Mvp	Fos	Rnf170	Ralgapb	Ly6c1		Abtb2	Foxj1
	Ap2a2	Ovol2	Trav13-2	Wipi1	Galk2	Klf5	Tmem127		Plagl2	Endod1
	Stxbp1	Pot1a	Tcstv1	AC163677.1	Edem1	AC158295.1	Tmco3		Rlim	Gart
	Lyplal1	Phkb	Krtap4-13	Ppm1k	GM20091	Otud7b	Wdyhv1		Rab30	Gemin6
	Lrrfip1	Zfp69	Pold4	Fbxo30	Dcun1d1	Csnk1g3	Crlf3		Klhl20	Lonrf1
	Kctd3	Mtm1	Parp3	Mxd1	Larp4b	Nupr1	Gng12		Adprh
	Prkx	Stag2	Mylk2	Gbp5	Ube3a	Slc35e3	4930402H24Rik		Ctdspl2
	Sos1	Mzt2	2310002J15Rik	Swt1	Polr2e	Wdr37	Hip1		Qk
	E130308A19Rik	Ppap2a	Gbp7	D230025D16Rik	Tmco1	Dock8	Peli1		Pomgnt1
	Ddx19b	Otx1	Gm14556	Mxi1	Cpne1	Sqrdl	Arhgap18		Ndufv2
	Tmem65	Pxdc1	Tgtp2	Kctd12b	Pigg	Gch1	Dock5		Pip4k2a
	Pcyt1a	Gm17108	Gdnf	S100a13	Ifngr1	Mafk	Ankrd11		Phf15
	Eif2c2	Rpp14	Pdlim2	Ahr	Med19	Car5b	Abcc5		Terf1
	Uqcrq	Nfkb1	Trim21	Ifi202b	2900026A02Rik	Ubr2	Cxcl16		Strbp
	Mtfmt	Serpinb9	Gm7582	Fosl2	Xpo6	Cth	Ppm1a		2002-09-01
	Gtpbp2	Hoxa5	Cst6	Pcmtd2	Isg20l2	Madd	Filip1l		Fzd2
	Crem	Sap30l	Ctsd	Gm5918	Mgat4b	Krit1	Tsc1		1700054N08Rik
	Klhl15	Kif7	1110018G07Rik	Pdgfra	Vdac2	Ip6k2	Sbno2		Ppp3cc
	Htt	Slc1a4	Vldlr	A830005F24Rik	Gemin8	Bcl2l11	Aim1		Dph3
	Hnf1b	Trp53i11	A330021E22Rik	Speer4a	Cc2d1b	Ltbp1	Reep3		Sephs1
	Letmd1	Zfp141	Trim30b	Tmem50a	Pign	Mtor	Map4k5		Paip2b
	Secisbp2	Leprot	Golga4	Atg2a	Pou2f1	Rras2	Zdhhc20		Zfp148
	Fndc3b	Papolg	Bcap31	Ccrl2	A830082K12Rik	Chmp2b	Rc3h1		Fam49b
	Rabgef1	Ino80c	Aldh2	Ip6k1	Elavl4	Ndel1	Ankrd1		Eif5
	Gm5331	Pank1	Nbl1	Fez2	Ramp1	Txnip	Cyld		Pdcd6ip
	Plxnb1	Atl1	Olfr1474	Ifi204	Dlg5	Rexo2	Fam164a		Ctbp1
	Olfr332	Prpf39	Mccc2	Plekhm1	Adh7	Fam32a	Ppp1r12a		Alg14
	Mttp	Cyp4f41-ps	Shisa5	Fbxo32	Calm1	Cdkn2a	Rcan3		Als2
	Mthfsd	2700049A03Rik	Cabp1	Myo6	Arpc1b	B630005N14Rik	Ubxn7		Acer3
	Dda1	Rdh5	Tdeanc2	Mtus1	Sirt1	AC099930.1	Plk1s1		Idh1
	2210016F16Rik	Gata3	Gpr107	4933431E20Rik	Casp9	Vsig10	Cyth3		Creb5
	Psapl1	Tmod3	Dhx58	Angpt2	Epha1	Helz	Apbb2		Prkaca
	Cmtm8	Arap2	2210408F21Rik	Pde4b	Mapk13	Fam134c	Cdc42		Cs
	Dnajc16	Olfr22-ps1	Cdadc1	BC031353	Grlf1	Mosc2	Sesn2		Emc10
	Gm15204	Tmem177	Glrp1	Tmc4	Btbd10	B3gnt3	Pptc7		Efr3a
	Gm9670	Zfp330	Atf7ip	Cyp39a1	Cdk7	Auh	Sppl2a		Gabpa
	Ndufb9	AC120217.1	Spryd7	Heg1	Me1	Zadh2	Slc7a11		Ssr3
	Zfp605	Rpf1	Rnasek	Nbr1	Atxn7l3b	Mbd5	Ly6i		Ndufaf3
	Olfr166	Gmpr	Acads	Amot	Uba1	Col4a3bp	Mbtd1		Hira
	Emp1	Med24	Fam126b	Rnf144b	Ddx54	Zfp326	Gosr1		R3hdm1
	Lypd3	Thoc7	2810474O19Rik	Slc25a27	Cables2	Tmem176b	Antxr2		Slc4a7
	Gpr108	Ppp2r5a	Desi1	Scin	Anapc11	Osbpl3	Arl5b		Pdia4
	Wdr13	Taf1b	Ube2l6	Pam	Hmg20a	Spn	Abi1		Nras
	Gucy1b2	Tle4	Sync	Nipal1	Zzz3	2310030G06Rik	Synj2bp		Dnajb11
	Ints10	Tbc1d15	Abhd3	Aplf	Ube2e3	Tra2a	Zxdc		Macc1
	BC017158	Lrrc49	Csf3	Fgd6	Zmym4	Nbea	Wasl		Fam199x
	Dgat1	Pdcl3	Gm13270	AC239677.2	5730409E04Rik	2006-03-01	Apaf1		Etaa1
	C87436	Rad17	Eif2ak3	Dram2	Fam105b	Syne2	Med23		Ptpn4
	Dapk2	Ppef1	Abhd2	Angptl4	Mknk2	Rnd1	Asb4		Akap11
	Foxa3	Zfp637	1700025G04Rik	4833420G17Rik	Fzd6	3110043O21Rik	Spag9		Gm12111
	Gm608	Lpcat2	Fggy	AI607873	Cox7c	Nhlrc3	Slc1a1		Arfgef1
	0610011F06Rik	Osgepl1	Rbm3	Dnajc12	Psca	Grpel2	Zfp867		Prnd
	Mthfd2l	Dnalc1	Gm5152	Fbxo6	2700089E24Rik	Krcc1	Myh9		2010-09-01
	4930519F09Rik	Nadkd1	Dnahc10	Apbb1	Traf4	Mmd	Os9		Tcea1
	Cd320	3110067C02Rik	Dapp1	Pdcd4	Rab1b	Abhd5	Arnt		Rcbtb2
	Gm13594	Bcl10	Zfp830	Tlr4	Qser1	Glyr1	Zeb2		Cep164
	Ddx5	Spnb3	Dedd2	Rasal2	Slc7a6	Arih1	Ly6c2		Snx24
	Pfkm	Dnm1l	Errfi1	BC094916	Setd2	Cisd2	Arhgef3		Lrba
	Tstd2	Olfr551	Serp2	Acad12	Dph3b-ps	Cxadr	Ppp1r7		Rdx
	Scrn3	Kcnab1	Pcnx	Rb1	Slc25a11	Igf2bp1	Nek6		Ube2q1
	Tbc1d9b	Ropn1l	Slco1c1	Etfdh	Ryk	Gstm1	Fst		Snord45b
	Stom	Nudt1	Cul7	Srgn	Pcyox1	Csnk1e	Eif4g2		Rsrc1
	Slc2a1	4930430F08Rik	Phf1	E130102H24Rik	Tmem60	Elmod2	Agl		Hadh
	Nav1	Chst9	Tchp	Abhd4	Notch2	Araf	Fgfr1op		Ikzf5
	Kcnk7	Iqsec1	Clec2d	Chic2	Zbtb41	Nqo1	Rcn2		Ctsc
	Ifitm2	Bdh1	Ctage5	Pdgfb	Abhd13	Txnrd1	Ap4s1		Pkd2
	Pde10a	Nom1	4930579G22Rik	Atp6v0a4	Rps16	Nus1	Lhfp		Nomo1
	Tbce	Anks1	Itpkc	Hadhb	Yipf6	Gm13157	Zfp238		Igfbp4
	Fam188a	Havcr1	S100a6	Porcn	Nkap	Tapt1	Csnk2a2		Spopl
	Rbpj	Dnajc11	Myl12a	Ypel3	Dlg3	Ccny	Lin54		Lta4h
	Pkhd1	Phtf2	Tmbim4	Casz1	Abcd4	Nrm	Gsta2		Gfm1
	Thrap3	Rilpl1	Rnf19b	Slc35d2	Gne	0610007P08Rik	Srsf10		B230118H07Rik
	Wac	2310039H08Rik	Setd7	Rasgef1a	Cox15	Bcas2	Tmem109		Agfg1
	Olfr802	Mcfd2	AC126250.1	Gm14693	Zcrb1	Seh1l	Pole4		Cct8
	Rprd1a	1810026J23Rik	Fbxw17	Ift46	Cbfb	Dhx15	Creg1		Spg20
	Nab2	Ptpn11	Prkce	Mnda	Nxpe3	Rps6ka3	Nab1		Morc4
	S100a10	Scrib	Mfsd11	Plin3	Rpl22l1	Ssbp3	Caprin1		Polr1c
	Ifitm7	Lama5	Plxna4	Pxk	Enox2	Dynll1	Acly		Armc1
	Ppl	Sh3bp1	Tsta3	2310079G19Rik	Rpl38	Arrdc3	Nmt1		Rpl9
	Tpm2	Cdk18	Phyh	Ctdsp2	Mib1	Aars	Ptp4a1		Slc5a3
	Prkcdbp	Alg2	Mia2	Akr1c12	Mllt1	Rwdd1	Atp1a1		Cycs
	Zfml	A730090H04Rik	AC154660.1	Dfna5	Tmem18	2410076I21Rik	Gpn1		Nepn
	Plekha8	Glis2	Ube2g2	Gm10220	Ier3ip1	P4ha1	Psma3		Gm17296
	Fam176b	Tmed8	Plce1	Golph3l	Glo1	Wipf1	Hnrpdl		Ptgfrn
	Cdc26	Zfp639	Trim12a	Akap13	Znhit1	Atp2b1	Exosc8		Rangrf
	Ppme1	Zbtb25	Aipl1	Slc17a9	Neu1	Cinp	Ube2v2		Gja1
	Wbp1	Psmb10	Cdc20b	Itgb5	Ramp2	Gli3	Fam82a2		Acy1
	Mgst3	Hlcs	Ranbp10	Gstm5	Foxo1	Psip1	Chsy1		Rpl22
	Rxra	Gnl2	Tsc22d3	Dusp6	Nat15	Slc25a33	Cks1b		Poc1b
	Klhdc5	Golt1b	Pfdn1	Rbl2	Galnt3	Ube2i	Pten		Slc22a29
	Zfp324	Rdh13	Sympk	Reps2	Fam116a	Yrdc	Srcap		Ugt1a6a
	Nfat5	1700021K19Rik	Grik5	Hacl1	Fads3	Grhpr	Rhobtb3		1700016C15Rik
	Serinc2	RP24-376E16.2	Napa	Wbscr27	Ormdl1	Trub1	2310008H09Rik		Rpl13
	Zfp362	Apol7c	P2ry14	Cln8	Kpna6	BC029214	Nin		Mrc1
	Rapgefl1	Slc27a1	Golga3	Sri	Gm14296	Zfp948	Nfya		Spp1
	Dag1	Rbm15b	Grpel1	Map3k6	Snx12	Whsc1	Lcorl		Cenpw
	Ddx46	Baiap2l1	Ubl5	Pla2g7	Pno1	Nfil3	Mycbp2		Cdkn3
	Banp	Mgat2	Pttg1ip	Osmr	Taf13	Thap2	Fxr1		Gm10639
	Trib2	Rev3l	St7l	Siae	Vamp3	Vcam1	Lpgat1
	Ptgds	Morc2a	Dusp14	Zmym5	Fam162a	BC057079	Scd1
	2610301G19Rik	Agxt	Mboat7	Fdx1	Aqp1	Prkrir	Lmo4
	Aldoa	3110009E18Rik	Zfp622	Nbeal1	9230110C19Rik	Spsb4	Clcn5
	Vdr	Snrpa	St6gal1	Acbd5	Slc25a16	Pus10	Gm11488
	Ahcyl2	Sf3a1	Ogfr	Il5ra	Tab3	Hus1	Atl2
	Cotl1	1810013D10Rik	C130073F10Rik	Megf10	Zmat3	Tars	Cbx1
	Bnip3	Kazn	Sepw1	Gm9758	Impad1	Ipo7	Setd8
	B9d1	Fastkd3	Gak	Hsd17b11	Amfr	Jun	Zfp808
	1700026L06Rik	Med26	Rhou	Sccpdh		Frmd4a	Hgsnat
	Marcks	Exosc4	Hgs	8430408G22Rik		Cgnl1	Gxylt1
	Nr2f1	Ncoa1	Mx2	Baz2b		Ak4	Utp15
	Mybpc2	Canx	Tdrd7	Zranb1		Lbr	Thbs1
	Dmpk	Abcb10	Slc30a1	AL691505.1		Ier5l	Acox2
		Tgfbrap1	Igfbp7	Map2k4		AC147987.1	Pkia
		Phlpp2	Pfdn5	Wdr26		Epn2	Sys1
		Ano9	Tpt1	4930455F23Rik		Tspan12	Gcsh
		Fam83h	Hist1h2bc	Snrpn		Ak2	Pitpna
		Ralb	Mdm2	Tsg101		Ctps	Phf6
		Pgap1	Klhl28	Lysmd1		Ccdc88c	Cox11
		Trit1	Psap	Crim1		Iars	Cyb5r1
		Zfp296	Dusp13	Gm4955		Usp15	Mob3b
		Serpinh1	Golga1	1810010H24Rik		Srebf2	L2hgdh
		Prkcq	Xaf1	Cdkn1b		Map2k3	Enpp4
		Lrp11	Tmf1	Slc26a11		Asb13	Tmem20
		Micall2	Atp6v0e	Snx14		Atxn2l	Hmbs
		Tcirg1	Gramd1a	A930001N09Rik		Cstf2	Mrpl49
		Trmt10c	Slu7	Ethe1		Agpat2	Camsap1
		Phf23	2410015M20Rik	Cst3		Zcchc7	Snhg3
		Slc25a26	Speer2	Tspan15		Rai1	Asph
		Sh3tc1	Atp6ap1	Arsk		Hnrnpd	Bahcc1
		Itpr1	Cblc	Smarca2		Rwdd3	Tor2a
		Sf3b3	Rab4a	Entpd3		Areg	Tmx1
		Mapk14	Gbp6	Hexim2		Nip7	Hsd17b7
		Ptdss1	Magi1	Brox		Nt5dc3	Marcksl1
		Saa2	D330028D13Rik	Tecpr1		Ehd2	Usp31
		Zfp623	Rab3c	Ddi2		Slamf9	Pdk1
		Yy1	Cish	Speer3		Top1mt	Slc11a2
		Gprasp1	Irf2bpl	Necap2		Slc35b2	Cdv3
		Gm10264	Mlycd	Zfp677		Srsf6	Arhgap19
		Zcchc2	Tob1	Etv1		Eml1	Tuba4a
		Nap1l4	Ing4	Tslp		Ccdc93	Tfb1m
		Rgl2	Ssh3	Speer6-ps1		Rpn1	Ivns1abp
		Zfp827	Nalcn	RP24-547D11.3		Fam171a1	Mtap1b
		Dcun1d2	Mylpf	Ccng2		Irf2bp2	Klra4
		4930506M07Rik	Itpripl2	Tnfrsf26		Ticrr	Wrb
		Alkbh5	Galnt13	Apool		Jagn1	Tuba1a
		Aco1	Chmp1a	Ep400		Bicd1	Uck2
		Arhgef40	4930579C12Rik	Kctd20		Rap2a	Slc1a5
		Mrps18b	mt-Nd5	Il12rb1		Klhl22	Def6
		Uck1	Xlr	Zfand6		Ddhd1	Tbrg4
		Nisch	Tox4	Osbpl9		Prmt7	Ssx2ip
		Rbm43	Anxa5	Bcl6		Hspa4	Rrn3
		Pkp3	Gabarap	Trim13		P2ry12	Gstcd
		Midn	Camk1	Hip1r		Agbl3	Pold3
		Ksr1	Dmrt1	Herpud2		Snupn	Snx7
		Zfp507	AC158993.1	Tspan5		Nap1l1	Dab2ip
		Gm16039	Arid3a	Rnf217		Shcbp1	Zfand3
		Psmd3	Zdhhc24	Irf8		Tial1	Rad54l
		Wls	Stx8	Rsc1a1		Frmd5	Pxdn
		Wnt4	1600014C10Rik	Zfand5		Epb4.1l4b	Sh2d5
		Ltbp2	BC017647	Frmd8		Tspan3	Ctnnal1
		Fam46b	AC122465.1	Cyp4f17		Abcf2	Ltbr
		Pcbp1	mt-Nd4	Smox		Lad1	E130309D02Rik
		Slc38a10	Sik1	Mospd2		Ttc37	Trac
		BC003965	Vcp	Fbxl20		Fastkd1	Ppif
		Maged1	Ak3	Slc12a6		Fosl1	Socs3
		Trpv4	H3f3a	Crot		Ubash3b	Mpzl3
		Pgrmc1	Tmeff2	1500003O03Rik		Ikbkap	Eno3
		Pdgfa	B2m	Appl2		Ccdc92	Ankrd49
		Bid	Asap1	Avl9		Marveld2	H1f0
		Tmem88	Snx6	Tmem62		Heatr1	Mthfd2
		BC046404	Capn5	Wdr45		Lrrc26	Tuba8
		Fnip2	D16H22S680E	Vmp1		Tuba3a	Txlng
		Exoc3l4	Dtx2	Eya1		Scg5	Slc16a6
		Dbn1	Wdr70	Jmjd1c		Slco2a1	Lass6
		Eif4a2	Ctsa	Gzmk		Cenpi	Ldlr
		Ddr2	Ndufa7	Pik3cb		Papd7	Zfp9
		Sf3b4	Nrp2	Btn1a1		2510049J12Rik	1190005I06Rik
		Adck1	Sgsm3	Tacc1		9630033F20Rik	Klra1
		Coa3	Tfcp2	Epdr1		Naa40	Tuba1c
		Fam50a	Cdk5	Vasn		Stk17b	Cyp51
		Scyl1	Ahi1	Rin2		Foxn2	Acsl3
		Large	Osbpl8	Mynn		Smc2	Polr1a
		Pmepa1	Lynx1	Bcl2l15		Acsl1	Prss23
		Trmt61b	Arpc3	Dgka		Baz1a	Rrbp1
		Pard6g	4933433P14Rik	Gm9125		Cad	D2Ertd750e
		Unc119b	Hsbp1	Hsdl2		Tmem238	Snx25
		Coq9	Tifa	Prkg2		Fbln2	Slc16a1
		Zfp143	Ysk4	Dnase1l1		Hist1h2af	Cdkn2d
		Sh3bp2	4933421O10Rik	Rmnd5a		Hist2h2aa1	Dhcr7
		Mta2	C330006K01Rik	Gpx8		Naa25	Gar1
		Plekho1	Gdi1	Ccdc28a		Lrp8	Tmem125
		Isg20	Arhgef18	Slc38a9		Lrr1	Orc1
		Oasl1	Ptdss2	Fam134b		Ddx27	Dusp7
		Bdp1	Urm1	Gabarapl2		Srsf2	Cdc6
		Ivd	Dmrtc1c2	Casp3		Ptpla	Osgin1
		Ccdc47	Fem1c	Dstyk		Tra2b	Ccne2
		Ubxn4	Srr	Mkrn1		Cpox	Hnrnpa1
		Chtf8	Coro7	Gbp2		Kif23	H2afx
		Nudt22	Adipor2	Hexb		1500011K16Rik	Sh2b3
		Thoc3	Ubap1	Cnst		Dlx4	2010002N04Rik
		Ippk	Snx21	Tnfrsf23		Plxna1	Cdca7l
		Dcaf5	Rps6kc1	Gpcpd1		Car12	Rhpn2
		Mapk7	Zfp558	Ifi203		B4galt2	Bag2
		Gdpd5	Zfp212	Bdnf		Slfn9	Dnaja4
		Plekha6	Zhx1	Il18r1		Serpine1	Bnc1
		Ly75	Dhrs9	Mettl5		Adamts1	Nolc1
		Zswim1	Ascc2	Parp14		Ccbe1	Mest
		Agrn	Bcl11a	Klhdc8a		Cks2	Sox11
		Naa20	Frk	Klc3		Cxcl10	Zfp367
		Mtmr4	Zkscan6	Inpp5k		Hist2h2ac	Ddah2
		Bcr	2810002N01Rik	Rap2b		Amd-ps4	Sqle
		Lat2	Ano10	Tcf7l2		Srsf1	E2f7
		Rassf1	Gm5828	Lpar6		Ppil1	Ngf
		Fem1a	Tef	Arhgap1		Timp1	Hells
		Dlx3	Blvrb	Ift74		Ptgs1	Sertad4
		Rreb1	Vipas39	Hbp1		Eya2	Scd2
		Fzd7	Fam120b	Iscu		Hist1h2aa	Srm
		Ndrg4	Stx4a	Gm13961		Stbd1	Hs6st1
		Tgm1	Sema3c	Supt4h1		Hist1h2ak	Scx
		Bahd1	Ndufa11	Six4		Crabp2	Tcf19
		Klhl26	Clybl	Gm14700		Lpar2	Id2
		Cebpb	Mgrn1	Slc31a2		Cdr2l	Ccnd1
		Slc39a13	Mecp2	Cdan1		Bora	Tfrc
		AC151989.1	Bag1	Ehf		Amd-ps3	Aqp5
		Ddit4	Setd1b	Icam1		Trip13	Inhbb
		Wfs1	1700011J10Rik	Anxa7		Hist1h2ai
		Fbxo17	Klhdc1	1700037H04Rik		Nuf2
		Klk6	Dennd2c	Ube2j1		Hist1h2ao
		Nuak1	Eps8l2	Cryaa		Klra7
		Dact2	Ppil6	Pcmt1		Abcb6
		Nampt	Rnf31	2610307P16Rik		Rom1
		Rab32	Hagh	Slc44a2		Hspa9-ps1
		Htra1	BC030336	Nck2		2610301B20Rik
		Hk2	Sost	Srd5a1		Bysl
			Slc26a10	Decr2		Klra8
			Vmn2r-ps53	Bbs9		Chd9
			Gm8757	Znrf2		Hspa9
			Lrsam1	Pnp		Rpp40
			Synj2	Lnpep		Podxl
			Speer4d	Gm9770		Rtn4r
			Trim26	Prpf18		Cdc25a
			Pcdhb17	Ezh1		Ppan
			A230072E10Rik	5730469M10Rik		3110082I17Rik
			Gba	Pmm1		Tada1
			Ppp1r13l	Fam100b		Slc7a1
			Ngef	Maml1		Gm9797
			Kdm3a	Sft2d2		Lipt2
			Acy3	Hipk2		Sec24d
			Zbtb49	Arid4b		Id1
			Ddr1	Ppip5k1		Cdt1
			Macrod1	Nek3		Oaf
			Kctd5	Enkur
			Srp14	Ostf1
			Accn5	Tgfbi
			Rapsn	Slc10a3
			Gm16153	Ccndbp1
			AC238940.3	Stx12
			Dnajc19	Braf
			Herc2	4930523C07Rik
			Slc35f5	Trafd1
			Ubd	Mef2a
			Fmn2	Tmem188
			Irf1	Phf8
			5033411D12Rik	Bmpr2
			Epb4.9	Ralgps2
			Rfx5	Depdc7
			Adcy3	Tmem71
			Ulk2	Cir1
			Tmem47	Esyt2
			Ankrd42	Junb
			Gm12424	Eif2ak1
			Tshz2	Flot1
			Ost4	Ciao1
			Camk2d	AU018091
			Plcb2	Efna1
			Hspb3	Rac1
			Spag16	Ranbp9
			Gpr139	Hebp2
			Frem2	Fmo5
			Asxl2	Pcmtd1
			Klhl13	Atp6v1e1
			Fkbp1a	Tshz1
			Aox1	Grb7
			Alg11	Pgm2l1
			Nt5c2	Chchd7
			Aagab	2007-03-01
			Ccdc28b	Frg1
			Zfp287	Zbtb4
			Lrrc20	Sgtb
			Tnfrsf9	Letm2
			Csf1	Serinc1
			Dsg3	Nat2
			Nppb	1810011O10Rik
			Prkcz	1700069L16Rik
			Spty2d1	Plekha4
			Pgd	Gm14079
			Homez	Xpa
			Rnf185	Hectd1
			Etfa	Sbds
			Shfm1	Lgmn
			Mink1	Vamp8
			Ghrhr	Tspyl1
			Cd274	Nr2c1
			Chadl	2610029I01Rik
			Tmed4	Ifi27l2a
			Grtp1	Zfp955b
			Rhoa	Chn1
			Nat6	Aldh6a1
			Ccdc171	Fcho2
			Lims1	Slc45a4
			Vps37a	Rab3gap1
			Dhx32	Ap3b1
			AARSD1	Parp12
			Ttc39c	Glrx
			Cgrrf1	Hdac5
			S100a3	Echdc2
			Samd8	Ubap2l
			Zfp263	Gatsl2
			Fbrs	5031425E22Rik
			Il1rn	N4bp2l1
			Mapre3	Chrnb1
			Slc28a2	Ocln
			Oas1g	Mcart1
			Med10	Rnf167
			Eif4h	Ggps1
			Eif4g3	Utrn
			Phf11	Mapk1ip1
			Krt18	Zcchc11
			Tcta	Arid4a
			Fbxl21	Agpat5
			Fam195b	Trp53inp2
			Atp6v1f	Gtf2b
			Dusp2	Atg12
			Slc6a14	Tax1bp1
			Atg4c	2410089E03Rik
			Babam1	Paip2
			Pxn	Lrrc28
			Katna1	Adprm
			Cln3	Ttc30b
			Rhoc	Gnal
			2900053A13Rik	Wwtr1
			Rab33b	1110003E01Rik
			Ift43	Ppp3ca
			Ift88	Fam100a
			Numa1	Atxn10
			Olfr129	Dnajc8
			Ccdc122	Khnyn
			4930544G11Rik	Speer5-ps1
			Timm22	Hspb7
			Ttc23	Zfp30
			Rgp1	Rgnef
			Cwc25	Acox3
			Ufd1l	Pi4k2b
			Mesp2	Cdc14b
			Vsig2	Rere
			Myl12b	Mtap7
			Ndor1	Nlrp10
			Cap1	1110032A03Rik
			Zxdb	Snapin
			Gm6584	Ankle2
			A830007P12Rik	Dnajb6
			Dock6	Acadm
			Fgfr2	Plcl1
			Cog4	Thra
			Adam12	Rab5b
			Rec8	Nmi
			Ino80b	Zscan21
			Gm6851	Tmem87b
			Kif3c	Ptges
			Niacr1	Maf1
			Ndst1	Psg16
			Grina	Steap2
			Plekhm3	Mff
			Dock7	Ly96
			Abr	Rasgrf1
			Igf1r	Il17ra
			Gpa33	Zbtb44
			Spna2	Tmcc3
			Usp54	Ndfip1
			Atf2	Secisbp2l
			Smoc2	Glcci1
			Prl14l	Pyhin1
			4930506C21Rik	Ltb
			Trip12	Tirap
			Ypel2	2002-03-01
			Atp6v0b	Snx13
			S1pr2	Tnrc6b
			Olfr1153	Tuft1
			Ptrh1	Atp2c1
			Hexa	Leprotl1
			Ergic2	Arhgef7
			Gm12657	Usp8
			Bptf	Tmem59
			Prrc2c	Ehd4
			Zfyve16	Dcaf6
			Pik3c2a	Sec62
			Gm14634	Zfp945
			D11Wsu47e	Gm14737
			Olah	Rnf11
			Cntnap2	Kat2b
			Ifngr2	Dusp1
			Ubr4	Baalc
			Elp5	Spink2
			Iigp1	Msrb1
			Nceh1	Olfr1349
			Pon2	Med21
			Nfkbib	Birc3
			Tap1	Arhgef11
			Coro1b	Speer4e
			Ubxn1	Mpp5
			Ssu72	Snap29
			Brd4	Pik3ca
			Psme4	Fcgrt
			Armc7	Vmn1r18
			Gm4954	Pbx1
			Wif1	Ccnc
			Tmem217	Rad52
			Mbd1	Heca
			Zfyve26	Cyp2c44
			Dap3	Tnfrsf22
			Mterfd2	Olfr1372-ps1
			Raver2	Dynlt1c
			Arhgap23	Txndc16
			Echdc3	Cd47
			Ist1	Fam177a
			Ppp1r10	Cubn
			Arpc2	Nipal3
			Ythdf3	Aida
			Moxd2	Gm9812
			Olfr1328	Zfp874b
			Micall1	AW549877
			Mras	Wdr44
			Parp8	Mthfs
			Rabep2	Tor1aip2
			Il7	Klhl8
			Tcf25	Epb4.1l5
			Trmt12	Bcas3
			Huwe1	Ulk1
			Tmem184c	Gpr56
			Ociad2	Klhl24
			Myoz1	Aig1
			Fyco1	Zfp185
			Ankrd12	Kif3a
			Slc22a18	Mettl7a1
			Fam54b	Itm2b
			Spaca7	Shroom2
			Mapk9	Olfr352
			Ctnna1	Cyp4f13
			Apobec3	Pdlim5
			Fank1	Gm10634
			Tmem106c	Acsbg1
			Slc25a43	Gtf2f1
			Igsf5	Glis3
			Gtf2ird2	Rab31
			Phyhipl	Slc2a8
			Clip4	Vbp1
			Cebpg	Pnpla8
			Mon1a	Ralbp1
			Klf2	Gm14654
			Napsa	Scarb2
			Pcdha10	Chd6
			Rhbdl2	Tbx6
			Snrnp27	Dock9
			Fbxl2	C1ra
			Mtf1	Perp
			Irx4	Slc25a35
			Jtb	Adipor1
			Bcl2l1	Prdm1
			Tm2d1	Syf2
			Sec63	Gpsm3
			Elmo3	Adck4
			Gm11602	Ccdc90b
			Sh3rf3	Napg
			Itgal	Caml
			Prpf6	Kdm6a
			Dcaf11	Tmtc4
			Vps13c	Tnfsf12
			4930500J02Rik	Cav2
			Psmd4	Smad4
			Col10a1	Rtn3
			Zfhx3	Rnf146
			Zbtb26	Wipi2
			Kcnj15	Dpy19l4
			Usp19	Cmbl
			Hif3a	2310022B05Rik
			Nhlrc2	Snap23
			AC137970.1	D1Ertd622e
			Zfx	Dirc2
			Slc29a3	Pnrc1
			Rbm48	Zfp386
			Dctn2	Ell
			Gfra3	Nxt2
			Disp1	Ube2f
			Elf3	Tgds
			Mfsd9	Mier1
			Kcnq1	Arid5b
			AI837181	Pyroxd1
			Zfp949	Rnf19a
			Tap2	Malat1
			Gga3	Col8a1
			Gm10080	Pllp
			Tnfaip8	Taok3
			Myl6	Fbxw8
			Hsd17b12	Pard3
			Pld1	Whamm
			E330021D16Rik	Tex261
			Bhlhe40	Osbpl11
			Capg	Oaz2
			Psmd2	Glmn
			Atp5l	Plcxd2
			Diap2	Zbtb8b
			Cox7b	Wdfy1
			Vps45	Zrsr1
			Gm20499	Irf2
			Atp5s	Fbxo8
			Tcf4	Tspan8
			Rab35	Sh3bgrl
			Fbxo44	Micu1
			H2-T23	Ube2r2
			Sharpin	Zfp772
			Itfg1	Jak1
			Ppp1r3a	Gm3912
			Tiam2	Atg13
			Bet1l	Rsbn1l
			Wipf2	Lpin1
			Brap	A2ld1
			Fgfr1op2	Mat2b
			9430091E24Rik	Trpc4ap
			Dctn4	Bbx
			Prnp	Vamp5
			Eif2c3	Tbc1d23
			Pygb	Chm
			Degs1	5530601H04Rik
			Rtn1	Harbi1
			H2-Oa	Stxbp3a
			Ubn1	0610040B10Rik
			Pi4k2a	Ddb1
			2610204G22Rik	Mta3
			Fcf1	Zfp955a
			Stam2	Snrk
			Trrap	Slc44a4
			Clip1	Gcc2
			Tmem128	Hsd17b4
			Tmem167b	Ttc33
			Flad1	Tmem184a
			Ptpre	Rpap2
			Egf	Tpd52l2
			Trappc1	Abca5
			Creb3	Gpbp1l1
			Olfr430	Akr1c19
			Cdipt	Mmp10
			Cul2	Rabac1
			Med28	Cript
			Aox3	Pnpla7
			Wnt5b	Rasa1
			Acvr1c	Arhgef1
			Neb	Gm15405
			Mea1	Stx5a
			Fas	Zfp229
			Ldb1	Clp1
			Mertk	Atg14
			Nkain2	Kif5c
			Kank2	Cldn4
			H13	Ptpdc1
			Gpd2	Vcpip1
			Rxfp1	Hid1
			Spg21	Chst8
			Rfx2	Ppp1cb
			Aldh3b1	Foxn3
			Phldb1	Ccni
			Tmem30a	Csf2rb
			Ttll5	Slc39a4
			Snx30	Ccdc53
			Capzb	Wdr60
			Ap3s2	Fam174a
			Pea15a	Rassf5
			Exoc7	Lrrc8c
			Trip4	Rsu1
			Fam175b	Cyb5
			Olfr1009	Crybg3
			Tbx21	Ypel1
			Nit1	Samhd1
			Slc3a1	1700023L04Rik
			Speer4f	Ubxn6
			Adora3	Trim34a
			Osbpl5	Kidins220
			Mob3c	Gm12942
			Rnf14	Cyp2s1
			Ppp1r14c	Strn
			Zfp87	Lrrn4cl
			Lsm10	Rc3h2
			Fetub	Mpzl1
			Gm7052	Slc22a23
			Plekhn1	4930563D23Rik
			B4galt1	B3gntl1
			Klhl18	Gm16515
			Wdr53	Trim23
			Glb1	Malt1
			Ptpn1	Zfp658
			Adrb2	Exoc2
			Slfn2	Tmc6
			Tmem63b	Atp6v0d1
			Atp9a	Fam103a1
			Aptx	Scp2
			Emc9	4833439L19Rik
			Gm12927	Pik3cd
			Cypt4	Car2
			Adamtsl4	Glg1
			Prg4	Urod
			Zmat4	Ogt
			Olfr197	Ctnnd1
			Stk10	Zfp560
			C2cd2	Zfyve27
			Opa1	Cmas
			1110038D17Rik	Bsdc1
			C330005M16Rik	D030047H15Rik
			Ctsb	3230401D17Rik
			Ttc26	Gm14801
			Cd7	Chmp5
			Zfp597	Xdh
			Olfr1276	Fbxo25
			Zbtb24	Gm14047
			Fam19a3	Sorcs3
			Nos1	Dub1
			Slc6a8	Ubr1
			Gna12	Eapp
			Ash1l	Add1
			Taz	Olfr319
			Purg	Rnasel
			Slc26a9	Asap2
			Atp8b3	Tnip1
			Olfr630	Ccdc68
			Lhx9	Cmtm6
			1500009C09Rik	Radil
			Cox7a2l	Tmsb4x
			Mcoln1	St18
			Mpdu1	Mospd1
			Golga7	Lrrc57
			Pggt1b	Slk
			Fam133b	Lmbrd1
			Olfr1472	Btg1
			Gosr2	Tmem38a
			Ndufv3	Gm12026
			Sypl	1810030N24Rik
			Rnh1	Fam82b
			Zfp46	Prune
			Gm5480	Erbb2ip
			D4Wsu53e	Psmd8
			C330011M18Rik	Exph5
			Rest	Cd82
			Epb4.1l4a	Cr1l
			Wbp7	Csrp2
			Tfb2m	Carhsp1
			Prdm2	Vps4b
			Cflar	Lats2
			Ttc38	Med13l
			Spdya	Ttc1
			Anks3	Scly
			Zfp352	Yes1
			Uckl1	Xrn1
			Gm5935	Irgq
			Gm15724	Oxr1
			Pxmp2	Cd109
			5430405H02Rik	Sh3d19
			Stk11	2410018M08Rik
			Renbp	A630007B06Rik
			Vps11	Pck2
			1700026D08Rik	Gse1
			Atp2a1	C1s
			Vps37c	Slc41a1
			BC006965	Mysm1
			Ube3b	Acad11
			N4bp1	Olfr1384
			Taf7	Amn1
			Rab18	Spire1
			Ascc1	Parp4
			Zdhhc5	Tmem184b
			Cyp2f2	Tbc1d17
			Hivep2	Epc2
			Kdm3b	Sgk3
			Cdkl1	Rbm41
			Pon3	Pgm3
			Vwa7	Zfp944
			1500011B03Rik	Rpusd1
			Atp6v1a	Bbs7
			Kansl3	Gss
			Dynlt3	Ap3s1
			Crcp	Twf2
			Fam76a	Myo1e
			Rbm42	Zdhhc9
			Sh3bgrl3	Dcaf8
			Zfp738	Yipf4
			H2-Q1	R3hdm4
			Tcstv3	Ctps2
			2310021P13Rik	Synpo2l
			Cd68	F8a
			Gm12590	Dennd5a
			9830144P21Rik	Sfxn3
			Mefv	AW112010
			Kynu	Myo1d
			4933434I20Rik	Trim12c
			Gm14420	Fryl
			Lasp1	Lnx1
			AC157896.1	Mtmr6
			Klf7	D19Wsu162e
			Acp2	Mkx
			Lgals9	4930453N24Rik
			Dctn3	Plekha5
			Ndufa1	Il28ra
			Kndc1	Btrc
			Arl3	Ebp
			Adamts16	Lrrk1
			Mtch1	Kctd10
			Akr1a1	Tmem106b
			Neu3	Cpe
			9130017N09Rik	Zmynd15
			Cox6c	Btd
			Gm16428	Atg16l2
			Hint2	Mpp6
			1700109H08Rik	Slc37a3
			Copa	Lrif1
			8430410K20Rik	Olfr1353
			Tcn2	Cds2
			Tor1aip1	Pcsk7
			Inppl1	Aldoc
			Olfr1337	Mapk3
			Armc3	Armc10
			Sp110	Arhgap42
			Chrna9	Mob4
			Zfp14	Nqo2
			Mark4	Ganc
			Dnajc3	Inpp5f
			Cpt1c	Abtb1
			Ociad1	Ctsl
			Arl4c	Usp18
			Cib1	Ncoa2
			Vti1b	Pcyt1b
			Clasp1	Serpinb6b
			Pml	Cnppd1
			Nktr	Rbpms
			Psmb5	Fam63b
			Cog3	Prss8
			Tmem19	Papd5
			Csf2	Aph1b
			Myf6	Mettl7a2
			Pan3	Gm11395
			Spata9	Arl4d
			Ankrd6	Serpinb6a
			Stat5b	Snx9
			Bst2	Cnot6l
			Foxb1	Pls3
			Ecm1	Klhdc2
			Creb1	Cage1
			Rcan1	Rab11a
			Scamp1	Sdc2
			Rnf166	Rufy2
			Slc48a1	Ddt
			Uba5	Ppbp
			Kif1b	Mbnl2
			Appl1	Vgll4
			Mudeng	Stk4
			Mocs3	Xlr4b
			mt-Atp6	Snap47
			Neurl3	2810403A07Rik
			Slc35a2	AC108401.2
			Olfr340	Gramd1c
			Fkbp8	Rnf216
			Jkamp	4930412M03Rik
			Sod1	Gramd3
			Fbxl5	Ccdc157
			Wdr81	Arl13b
			Pbx4	Arap3
			Rsbn1	Smad3
			1110051M20Rik	Fam13b
			Mrpl38	Tusc2
			Psmb1	Cbr4
			Dbndd1	Usp32
			Pla2g4b	Oip5
			Trim41	Fga
			Uap1l1	Frs2
			Zswim4	Zer1
			Tmem203	Ccdc173
			2005-03-01	Slc13a5
			AI316807	Fbxo33
			Arl14ep	Fam123a
			Rac2	Rhobtb1
			Poldip3	Ear2
			9430020K01Rik	Snapc5
			Nckap5	Spsb2
			Klk8	Spint1
			Dnttip1	Grin3a
			Lysmd3	Gm527
			Pdk2	Tlr6
			Kif9	Rabgap1
			Kdm5b	Slc35b3
			Htr1d	Glul
			Tapbpl	Mitf
			Smap1	Zmynd11
			Commd4	1810013L24Rik
			Trmt13	Fam45a
			Wnt1	F2r
			Eps8l1	Ctso
			Rwdd2a	Arpc5
			Syngr1	Cbwd1
			Trmt10b	Tmem202
			Txndc11	Ankrd40
			6430571L13Rik	Nthl1
			Gfer	Dusp16
			Trub2	Cdcp1
			Prkd2	Kansl1
			Bcl2l2	Sdcbp
			Gm11476	Crnkl1
			Rasgrp1	Tgoln1
			Zfp688	Zbtb42
			Psen2	Lrig2
			Ube2d1	Snx4
			Strc	Nfs1
			Glrx3	Abcb4
			Ndufs5	Yipf3
			Dpp10	Nedd4l
			Spata1	Twf1
			Sap30bp	AC142191.1
			Crtc2	Pramef8
			Ube2a	Synj1
			Rnf6	Itga6
			Wbscr17	Lin7c
			Ucma	Rab43
			Ccdc136	Zufsp
			Bmp1	Zfp711
			Tub	Lcor
			Wwp2	Plekhh1
			Tmem242	Hook3
			Lce1a2	Selk
			Obscn	Nudt17
			Gna15	Fip1l1
			AC161602.1	Aqp7
			Flcn	Dnajb12
			Tssc1	Asl
			Cox17	Hbxip
			Ppp2r5b	Fech
			Gapvd1	Vta1
			Diap1	Nt5dc1
			Fam123c	Socs2
			Ankrd44	Gpatch8
			Cox6b1	Zfp385b
			Ndufa6	Pion
			Ppp4r2	Jak2
			l7Rn6	Ppil2
			Sp4	Polr3gl
			Rab40c	Flt1
			Fam176a	Ugdh
			Tfe3	Npc1
			Fbxo2	Txndc12
			Elf1	Traf1
			Atp6v1c1	Dazap2
			Ufc1	Rassf8
			Wdr38	Lepr
			Nemf	Senp7
			AC027184.1	Anapc2
			Prcp	Serpinb3b
			Eno2	2410001C21Rik
			Stxbp4	Paics
			Plcd1	BC051665
			Laptm4a	Wrn
			Eif3k	Arhgap9
			Lamc2	9130206I24Rik
			Ndufs2	Mnat1
			Poln	Igsf23
			Pddc1	Chit1
			Vps33a	F11r
			Vps53	4632415K11Rik
			Rnaset2b	Arhgef9
			Katnal1	Gdpd3
			Arid1b	Atg9b
			Sdf4	Fbxo38
			Cdc37	Arhgap44
			Zfp654	Cpt1a
			Ric8	Slco4a1
			Camsap3	Tbc1d22a
			Sec14l1	B230312A22Rik
			Arhgap29	Cd38
			Nosip	Rasip1
			Ppp1r18	Nek9
			Vma21	Tmem123
			Pglyrp2	Eml2
			Cdk6	Gm16372
			Vps37d	Tmem212
			Itgb1	Dstn
			Etv4	Rnpc3
			Rogdi	Rffl
			Bfsp1	Itch
			1700128E19Rik	Erlec1
			Asxl1	3110002H16Rik
			Pafah1b3	Zmat2
			Lrp10	Sar1b
			Rbm5	Mcl1
			Hbq1b	Xlr4c
			Trim5	Gigyf2
			Rbbp9	Zfp943
			AA987161	Kdm1a
			Leng9	Hdac8
			Zfp384	Creb3l4
			Rnaseh1	4931406P16Rik
			Acot8	Hint3
			Cyba	Pef1
			Zfp595	Slc30a5
			Usp42	Ei24
			4921531C22Rik	Cmpk1
			Slc44a1	Zfhx2
			9430023L20Rik	Srcin1
			Gm5753	Stx16
			Stx1a	Ceacam19
			Nek1	4922501C03Rik
			Higd2a	Ube4a
			Ptpn7	1700021A07Rik
			Rnf13	Arhgap12
			Mpp1	Fmn1
			Psmb5-ps	1700009N14Rik
			Il4ra	Litaf
			Mapkapk2	Lonp2
			Ficd	Fam63a
			Card10	Sdf2
			Hmbox1	Clec5a
			Slc25a36	F3
			Ipmk	Abcb1b
			Dhrs11	Marf1
			Gm10678	Stard3
			Akr1b8	Tceb2
			Stat2	1700128F08Rik
			Heatr7a	Iah1
			Amz2	Pigc
			Fam117a	Akr1b10
			Spcs1	Mgea5
			Fxyd6	Sike1
			Kcne1	Gm12166
			AC161511.1	Dhx40
			Kif5a	Cacul1
			AF067063	Gpr83
			Mtpn	Atg4b
			Cd63	Gm12060
			Lypd2	5330438D12Rik
			Pitx3	P2ry1
			Gm13771	Otud5
			Igsf3	Tfcp2l1
			Trip11	Dhx57
			Acvr1b	Agtrap
			Tmprss15	0610010O12Rik
			Ccdc55	Zfp217
			Skida1	Tnks2
			Robo2	C130074G19Rik
			Acbd3	Gm12100
			Trim8	Pfkp
			Ildr1	Lin37
			Gatad2b	Anxa11
			Ctnnd2	Lrp5
			Txndc17	Bcl2l13
			Wdr34	4930525M21Rik
			Osbpl10	Cnot8
			Car7	Cep120
			Zkscan3	Erlin2
			Pde6h	Gm15760
			Cacna1b	Stap2
			Arx	Numb
			Ccdc112	Pir
			Vps26a	Bach2
			Arhgef2	Zfp266
			Prss50	Psmd11
			Sbk1	Rnft1
			9030624J02Rik	Deptor
			Dnmt3a	Gmfb
			Ctsw	Sestd1
			Sin3b	Ap4b1
			Ccz1	Sfxn4
			Zdhhc21	Chd2
			Olfr772	Pim1
			Atxn7l1	Nudt15
			Pdzd7	Dcaf10
			Airn	Olfr1366
			Ccdc130	Cept1
			Daam2	Tada3
			Rnf169	Tmlhe
			Atp11a	Fam18b
			Gm15787	Snx33
			Dtx3l	Rab13
			Ankhd1	Fam102a
			9130023H24Rik	Nr1d1
			Tmem87a	App
			Gm6768	Lrrc8a
			Tspan14	RP23-285C18.2
			Gm11434	Fam129a
			Tm2d2	Supt7l
			Tnks	Dsp
			Gm15800	Fam53c
			Cox4i1	Pex19
			Prdx1	Uaca
			Tmem66	AC147048.1
			Aldh7a1	RP23-302C16.2
			Olfr1427	Serpinb1b
			Olfr770	Rod1
			Gm13788	Tbx3
			Fer1l4	Cdh1
			Ncoa3	Cep128
			Clec4g	Ubl7
			Gna13	Arhgap10
			Flna	Klf8
			Il1rl1	Atat1
			Ccnl1	Itfg3
			Olfr1443	Stx6
			Fbxl18	Fbxo3
			Rbm27	Sdccag8
			Psenen	Hnrnpm
			Iqub	Usp48
			Catsperb	Efhb
			Limd2	Chmp4b
			Sucla2	BC031181
			AI661453	Cyp4f16
			Gm7247	Acpt
			Ank1	Itpr3
			H2-Q5	Dhrs7
			Ephx1	4933403F05Rik
			Otub1	Dmxl2
			Rnf214	Cyp1b1
			Tnfrsf14	Klf3
			Amigo1	Tcp11l1
			Lrch1	Spin4
			Mical3	Inadl
			Slc46a3	Kdm5a
			Cpeb3	Ly6g5c
			Mfsd8	1110012L19Rik
			Adamts12	Ing3
			Zfp407	Luc7l2
			Fahd1	Sidt2
			Gipc1	Wash
			Tmem183a	Itgb8
			Dbp	Gm16223
			Dnase1l3	Naip2
			Aldh3b2	Kbtbd2
			Ghr	Zc3h7a
			Pqlc2	Aldh3a2
			Mtif3	Zbtb43
			Purb	Neil2
			Ubqln1	Pls1
			Hes6	Dnajc28
			Xrn2	Zfp773
			Rcn3	Dok4
			Rchy1	Itm2c
			Bmpr1a	Lig3
			Mfn2	Cdc40
			Prdx4	Zfp7
			Stxbp2	Ccdc90a
			Cbll1	Zfp11
			Nat9	Gm20687
			Ak5	Acadl
			Hsh2d	Rassf6
			Dap	Rragc
			Cryab	Trib1
			Anapc7	1700088E04Rik
			Hspa2	Mtmr3
			Sh2d4b	Gprc5a
			Mtmr1	Tbcb
			A830080D01Rik	C130050O18Rik
			Mcam	Ubc
			Tmem59l	Ifit2
			Clhc1	Depdc5
			Nap1l2	Rbm18
			Rbp2	Zcchc6
			Zfp335	Gm14088
			AI462493	Rnf115
			H2-M2	Zfp758
			Gcat	Smg6
			Hivep1	Slain2
			Clint1	Mast4
			Cramp1l	Ift122
			Mmp11	Trex2
			Sdk2	Foxa1
			Csrnp1	Ift20
			Fbxo15	Mc4r
			4930515G01Rik	Mppe1
			Mon1b	Olfr1404
			Limd1	Slc25a20
			Tmem101	Scmh1
			Ggnbp1	Erbb2
			Gm9846	Cstf3
			Spg11	Bmyc
			Orc5	Slc22a4
			Ptp4a3	Sip1
			Olfr54	Acpp
			Nsa2	Gstt3
			Gm13120	Flot2
			Zfyve9	Manea
			Tnfrsf13b	Actr8
			Cdk10	Stau1
			BC005537	Pqlc3
			Skil	Ang5
			Fam118b	Uhmk1
			Sirt2	Trpv2
			Prrc1	Sacm1l
			Zmiz1	Mtmr14
			Alox12b	Gm2a
			Mpv17l	Csad
			Ift57	Dennd1b
			Dyx1c1	Ccnt2
			AL607123.2	Golph3
			Ttf1	Lsr
			Sra1	Snx11
			Tceal1	Arhgef25
			Fbxo28	Mon2
			Setmar	Elp3
			Fbxo18	Rorc
			Fam192a	Rab3d
			Crisp1	Mlxip
			Scap	Adck5
			Cyb561d1	Trim56
			Kansl1l	Cebpd
			Zbtb37	1110021L09Rik
			Slc16a13	Aplp2
			Taf6l	Pigp
			Slx1b	Gstt1
			Lhfpl4	Naa35
			Scnm1-ps	Il18rap
			Gm14446	Klf13
			Ccl2	Nek8
			Stard10	Golgb1
			Inca1	Fam3a
			Eaf1	Ikbkg
			Aanat	Uqcrh
			Gpd1l	Gm20632
			Fgl2	Smtn
			Nlrp2	Pnpla2
			Olfr683	Gal3st1
			Ang2	Nadsyn1
			Fis1	Kdm4a
			Ncoa4	Cpne3
			Arhgap26	Gjb4
			Rnf111	Hscb
			Nudt4	Cdc42bpa
			Upf2	Hcls1
			Psme1	Smc5
			Tmem41b	Isca1
			Hes2	Pdcl2
			Myst4	Gm10324
			Ech1	Pik3c3
			Acot10	Senp8
			Adam11	Rab11fip5
			Spata25	Lmbr1l
			Brd3	Akap9
			Becn1	Xrcc4
			AC130214.1	Tk2
			Ttc12	Acot13
			Zfp788	Rab2b
			Polr3b	Fam160b1
			Psmb6	Git2
			Olfr584	Gcap14
			Dock2	Gcnt2
			1700010I14Rik	Hspb9
			Il1r2	Esm1
			Olfr661	Ccdc174
			Arhgef37	Coil
			Irx2	Zfp444
			H2-D1	Actl6b
			Trappc10	Gm8038
			AC114988.1	Atg5
			Prrxl1	Zfp281
			Actr2	Fgfr1
			Ccdc43	Ogg1
			Usp9x	Zfp40
			2700097O09Rik	Vps13b
			Pdp1	Dlg1
			Erc1	Cdkn2aip
			Myocd	Inf2
			Nobox	Fhdc1
			Ube2o	Yipf1
			Gtf2a1	Atf5
			0610009B22Rik	Gm12043
			Taldo1	Ambra1
			Bmp4	Tmem167
			L3mbtl3	6720401G13Rik
			AC163611.1	Stoml1
			Dync2h1	Sat2
			Fut11	Ndrg2
			Igf2bp2	Akip1
			Zfpl1	Eif5a2
			Actr10	Bet1
			Ophn1	Cd9
			Meis1	1110002L01Rik
			Edf1	Ccdc17
			Rab36	Rpa3
			Btbd9	Klc4
			Ftsjd2	Tbrg1
			Tmprss6	Lphn3
			Cops6	Cd59a
			Map2k7	Jmy
			Orai2	Gpr101
			Pde1a	Trf
			Flywch1	Btbd6
			Paqr3	Syap1
			Nucb1	Rasa2
			Crhr2	Nrd1
			Lilra6	Dpm1
			D6Wsu163e	Itga2
			Ddx17	Bbs4
			Rarg	Polr3c
			CAAA01180111.1	Six1
			Elf4	Ptcd1
			Akirin2	Sos2
			Ctns	Nkiras2
			Arhgap33	Atpif1
			Ehd1	Ap1g1
			Nedd4	Dync1i2
			Celf2	Pld3
			Smcr7l	Vps39
			Slc9a3r2	Wdtc1
			Dpp7	Zkscan14
			1810030O07Rik	Slit2
			Vmn2r42	Olfr531
			Asprv1	Wbp2
			D17Wsu92e	1110058L19Rik
			Utf1	Nub1
			Crlf2	Cldn3
			Cdk12	Vps4a
			Wdr19	D3Ertd254e
			Tmem51	Tyk2
			Slc25a45	Zmym2
			Hspa1l	Sumo1
			Wdr59	Gm16124
			1700056E22Rik	Blvra
			Sox4	Pts
			D930015E06Rik	Zfp329
			Rab21	Ccs
			Stard3nl	Mfsd6
			AU019823	Fam72a
			Slamf7	Epb4.1l2
			Heatr6	Lysmd4
			Sde2	Ephb6
			Eps15l1	Zfp120
			Gm5077	Cadm3
			Prmt2	Fbxo36
			Zfp239	Rab17
			Mapkapk3	Gm14269
			Pla2g4c	Nfe2l1
			Slco1a5	Tmem170
			Usp25	Nudt7
			Gm11531	Ubb
			Use1	Asb7
			Gm8902	Phactr4
			Trappc6b	Med13
			Eda2r	Sugt1
			Pex3	Kdsr
			Basp1	Mccc1
			Gorab	0610031J06Rik
			Olfr58	Ccnjl
			St13	Mbp
			S100g	Gm16536
			Kcne2	Zfp954
			Arpc1a	Gfpt1
			Dtnb	Gba2
			Msi2	Ifi47
			Nanos2	Eps15
			Npepps	Ptprk
			Pde1b	Telomerase-vert
			Mndal	Akap2
			Rhd	Snw1
			Duox2	Ttbk2
			Dcaf7	4933434E20Rik
			Zfp790	Zc3h15
			Ppm1d	Ppfibp1
			Anxa4	Gm4285
			Nudt14	Rnf10
			Tbl1xr1	Eif4e2
			Ppp1r2	Fcgr1
			Col9a1	Gatad1
			6330416G13Rik	Cib2
			Smarcal1	Stambp
			Btf3l4	Tsc2
			Ranbp3	Dsg1c
			Clcc1	Asah2
			Mrpl22	Chkb
			Dcakd	Atf7
			Eef2k	Zfp54
			U2af2	Idnk
			Eif2ak4	Map3k3
			Hdac7	Spryd3
			Ap2m1	Las1l
			Hoxc5	Wasf2
			Pum1	Akt1s1
			Nol4	Gm16381
			Mfsd10	Rnf24
			Mtmr12	Ablim1
			Mall	Dynlrb1
			Olfr1431	Dnm2
			Pet112l	Prkd3
			Ccdc25	Ndc80
			Gpaa1	Gm6460
			Adap1	Eya3
			Adat3	Tmbim6
			1700030K09Rik	Npdc1
			Gsk3a	Hsd3b7
			Ppp2r2a	Defb11
			Timm17b	Tex2
			Fbxo7	Rit1
			Erp44	Cdpf1
			Fbxl17	Pde12
			Olfr976	Grk5
			Gpr133	Mtap9
			Socs4	Ncam1
			Samd14	Ankzf1
			Xpnpep3	Sepp1
			Nol10	Scfd2
			Rmnd1	Arl1
			Slc27a2	Pou2f3
			Lrrc40	Cyhr1
			Arl8b	Dcaf12
			Btk	Smpd2
			4930590J08Rik	4732418C07Rik
			Rnf152	Esco1
			Ccdc46	Lgals3
			Nsun5	Ap4e1
			Dis3l2	Snapc3
			Slc25a29	Mrpl33
			Mtpap	Rnf2
			Atp5c1	Mapkap1
			Ddx41	Nrbf2
			Smek1	Ikzf2
			Gm5797	Opcml
			Ncaph2	Pias2
			Obfc1	Mocs2
			Tspan13	Glod4
			E230019M04Rik	Gbp3
			Rap1a	Vps41
			Tmub1	Thpo
			Cdc123	Aldoart1
			Lca5	Ano6
			Polr3d	Ints4
			Ints8	Zfp52
			Ing1	Mfap3
			Mblac2	Zfp58
			Orc4	Kdm4b
			Armc6	Rala
			Ero1l	Usp12
			Crat	Foxj3
			Mrs2	Sh3glb1
			Ncapd2	Ptgr1
			Lrpap1	Prrx2
			Immt	Cacna2d2
			Fastkd5	Gnl3l
			Mll3	D18Ertd653e
			Wrnip1	Il15
			Hiatl1	Zfp951
			Mtmr2	Epcam
			Hcrt	Lrrc31
			Nrf1	Cul4b
			Abcb7	Bdh2
			Rgs9bp	Grn
			Rnf130	Atxn1
			Ywhae	Cops5
			Ufl1	Rora
			Agps	Tmem192
			Nupl2	Slc9a6
			Ctxn1	Atp6v1d
			4921536K21Rik	Nucb2
			Sirt5	Cep97
			Diexf	Fars2
			Usp45	Gsn
			2210015D19Rik	Angptl7
			D14Abb1e	Ilk
			Adh5	Ggt5
			Spats2	Rhbdd2
			Kif21a	Larp4
			Nmnat2	Pex2
			Gm12712	Thbs4
			Gnat2	Vegfb
			1810012P15Rik	Plek2
			3110053B16Rik	Srsf3
			Zscan12	Zcchc8
			Gm11627	Ppp2r3a
			Lsm1	Nudt8
			Gtf3c5	Ssh2
			Unc93b1	Matr3
			Gm16394	Mphosph10
			Olfr1102	Prkag2
			Zfand4	Tram1
			Insig1	Taf9
			Rps19bp1	Rbbp8
			Gm1631	Prmt6
			Fra10ac1	Usp14
			Rhno1	Emg1
			Vangl1	Cyp20a1
			Ccdc21	Zfp599
			Tnfrsf10b	Atp1b3
			Ncan	Lnp
			Ogdh	Get4
			AC125115.1	St3gal4
			Cnot1	Gls2
			Arl5a	Hspe1
			Snx27	Cluap1
			Svil	Elfn2
			Snrpb2	Cd24a
			2011-09-01	Taf5l
			Ppt1	Gnl1
			Phxr4	Fuca2
			Mrps14	Dnm3
			Pdcl	Pgpep1
			Nif3l1	Vmn2r81
			Derl1	Fancl
			Ercc8	Mrpl3
			Vps29	G3bp2
			Ccr10	Mre11a
			Ppie	Eaf2
			Atf1	Ier2
			Vmn2r-ps11	Cand1
			Tceanc	Pgap2
			Hnrnpl	Gins2
			Bms1	Phb2
			Slc35c2	Tmem194
			H2-Ke6	Pes1
			1700125H20Rik	Bcl7c
			Lphn1	BC023829
			Palb2	Marveld1
			Optn	Lck
			Faah	Bzw1
			Mbd4	BC026590
			Klhdc4	Dgcr2
			Ap3m1	Cdc7
			5730419I09Rik	Nfib
			Fxc1	Mcmbp
			Klra3	Nrbp2
			Wdr61	Rnf157
			Gemin5	Mettl8
			BC022960	4930422G04Rik
			Gm6292	Mal
			AC152453.2	Pitpnb
			Ifitm10	Stt3a
			Trove2	Gm10069
			Ppp6r3	Ehmt1
			Slc19a2	Nfx1
			Rabl3	Coro1c
			Rbm28	Nop58
			Spr	Ppp1r8
			Ndufa8	Ncoa6
			Bckdhb	Diablo
			Ebf4	Eif2s1
			Mrpl28	Txnrd3
			Dnlz	Rfc2
			Tomm6	Gramd1b
			Nln	Mthfr
			2410022L05Rik	Col5a1
			Sf3a3	Phgdh
			Ank2	Tcf7l1
			Srebf1	Pabpn1
			Parp16	Gm6480
			Eri2	Cd53
			Cpsf7	Gm6505
			Rps19	Ppp2r1b
			Cnpy3	Gm5884
			Plec	Itpa
			Nlrx1	Ino80e
			Zfp503	Manba
			Zfp689	Gyltl1b
			Cep76	Surf2
			Map3k1	Chaf1b
			Nono	Hnrnpk
			Esr2	Pde4dip
			Lpcat1	Raf1
			Thnsl1	Vezt
			Lamtor3	Gatad2a
			Entpd6	Tmem214
			Rilp	Aasdh
			Wdr8	Impdh2
			Fam38b	Mlec
			Map4k4	Dsn1
			Tmem179	Mapk12
			Acp1	Ermp1
			U2af1l4	Tpsg1
			Sub1	Cdca3
			Pdcd5	Pex12
			Zfp369	Zfp956
			Fam115a	Mrgprh
			Dtwd2	Cacna1g
			Ubl3	Zfp472
			Itga9	Cdc42ep1
			2610002M06Rik	Nucks1
			Itga7	Rad23b
			Slc25a28	Gm13152
			Rtf1	Pom121
			Rbm4b	Vcan
			Zfp81	Slc5a6
			Abca2	AC134826.1
			Pabpc4l	Rbm26
			Uxs1	Hcfc1
			Gm6710	Nabp1
			Pou3f3	Nol9
			Smchd1	Cpsf6
			Sltm	Tmem55a
			Fam76b	AW551984
			Polr2j	Mis18a
			Cmtm2b	Sf1
			Paox	Ftsjd1
			Gm5766	Ddah1
			Pcif1	Irx5
			Kcnma1	Mt1
			Smtnl2	Plekhj1
			Psma7	Khdrbs3
			Tfdp2	Rif1
			Ccdc41	Wdr67
			Chi3l3	Erf
			Plagl1	AI597468
			Pdxk-ps	Akt1
			Mycbp	Hnrnpul1
			Aacs	Rpp30
			Myo5a	Timm23
			Cisd1	Gphn
			Reep4	Usp50
			Gm9755	Csk
			Paqr8	Ctcf
			Glipr1	Tgfb1
			Rnf139	Chtop
			Aldh16a1	H2afz
			Lztfl1	Ccnh
			Tmem41a	Pak4
			Gm97	Tmx4
			2310033P09Rik	Smarcc1
			Fam184b	Cherp
			Wdr3	Trip6
			Ankrd39	Ankmy2
			Ebf2	Stmn3
			Ckap5	Dtnbp1
			Drosha	Gin1
			Mri1	Ipo5
			Eri3	Cobll1
			Hyls1	Coq2
			Pigyl	Rbm10
			Dnmt3b	Arid1a
			Tmem252	Wdr82
			Ywhaq	Snrpd3
			Bsnd	Atp8b2
			Cwf19l1	Lin9
			Adam15	BC048355
			Traf7	Fyb
			Atp8a1	Rad54b
			Ddx50	Rbm25
			Cetn4	Hps3
			Hsf1	Hnrnpa2b1
			Gmppb	Polr3g
			Il1rap	Mrpl41
			Llph	Steap1
			Cpped1	Zfp146
			Tmem168	Ccdc99
			Lmln	Mvk
			Plscr3	Eif4g1
			Kri1	Nup155
			Ubr5	Celf1
			Brcc3	Zc3h18
			Ddx19a	Ipo11
			Rock2	Ndufaf4
			Cnp	Gorasp2
			Prpf4	Efnb2
			RP24-170A20.3	Ankrd26
			Chst14	Fkbp2
			Comtd1	Krt19
			Scarb1	Nuak2
			Olfr1193	9430008C03Rik
			Eomes	4930503L19Rik
			Fance	Mtdh
			Adprhl2	Tcerg1l
			Gnai3	Adcy7
			Mcpt8	Ptplad2
			Fam123b	Tubb4b
			Tpd52l1	Dok1
			Rps28	Ergic1
			Tlk1	Snx18
			Dazap1	Jrk
			Zfp106	Eif1a
			Trp53bp1	Taf15
			Paf1	Batf3
			Ppp1r35	Parp1
			Thsd7b	Ubqln2
			Srcrb4d	Cops3
			Smpdl3a	Gclm
			Dcps	Prpf31
			Trpc4	Bspry
			Gm13227	Tsc22d2
			Nfyb	Hnrnph3
			Tead2	Ttc21b
			Il19	Ldha
			Psma4	Def8
			Exosc5	Pfn2
			Trap1	Erp29
			Parl	8430410A17Rik
			Muc20	Phf2
			Gpr156	Soat1
			Fam108b	Yae1d1
			4933411K20Rik	Xrcc5
			Taf9b	Cnksr3
			Bod1	Arhgap27
			Bcat2	Fabp5
			Rhot1	Srpk3
			Reep5	Polr1d
			Agtr1b	Gnptab
			Tro	Zfp706
			Timm44	Dus1l
			Gale	Gm13230
			Rpl34	Cops7a
			6030458C11Rik	Cask
			Prkab2	Gpr85
			D3Ertd751e	Isoc1
			Pfkfb1	Npr3
			Rabl2	Ipo4
			Hsp90ab1	Mlf1ip
			Gm5424	Cnih4
			Nfatc2ip	Tmem121
			Emc8	Pkig
			Pdia6	Pla2g12a
			Zdhhc16	Lingo2
			Zbtb8a	Mrps16
			Afap1	Prpf8
			Prkdc	Ccnd2
			Gm20715	Mrps6
			Pcbd2	Polq
			Mkks	Arhgdig
			Mtmr11	Gm10088
			Atg4a	Myo1c
			Tenm1	Actl6a
			Elof1	Prpf3
			Usp37	Mex3c
			Tardbp	Nol7
			Duoxa1	Frmpd1
			Fam120a	Cdc42se2
			Tom1l1	Prkar2a
			Tdh	Eml4
			Arhgef4	Ankrd28
			Naaa	Ptges2
			Trip10	Blm
			Ids	Dvl1
			Mrpl35	Rnf113a1
			Slco1b2	Sclt1
			Sft2d3	Snx8
			Tmem29	Gad1
			Cct2	Lonp1
			Qrsl1	Etnk1
			Trav1	Rrp9
			Kcnd2	Slfn4
			Spag7	Hjurp
			U2surp	Selrc1
			Pcbp2	Artn
			Vmn2r115	Tubd1
			Cpsf3	Polr2d
			Tubgcp6	Nr4a2
			Ccdc77	Senp1
			Zscan22	Cep55
			Nup54	Rqcd1
			Rab14	Gapdh
			Gm4989	Brix1
			AC139673.1	Mbd3
			Chd1	Slc35c1
			Mrp63	Ado
			Hnrnpa0	Foxk2
			Ccdc14	D17Wsu104e
			Impa1	Arglu1
			Nup153	Rps6kb1
			Gm7645	Zmiz2
			Atp6v0a1	Mab21l3
			Mto1	Pik3r1
			Atp1a4	Tada2a
			B4galnt4	Pafah1b2
			Olfr33	Gm7158
			Aebp2	Ccdc86
			Gid4	Afg3l1
			AC123687.1	Rcc2
			Dzip3	Olfr67
			Cacna2d1	D5Ertd579e
			Lphn2	Rabepk
			Gm11979	Exoc5
			Pim2	Far1
			Gadd45gip1	Nudt5
			Psmc2	Hn1
			C630043F03Rik	Tsfm
			A130010J15Rik	Mdn1
			Sil1	Ube3c
			Cct5	Gmnn
			Nubpl	Olfr474
			Mtcp1	Taf4a
			Eif1b	Lig1
			Bnip2	Cltb
			Stub1	Cic
			Mllt4	Gm14676
			Elovl1	Nup160
			Nop10	Anp32a
			Mrpl51	Zbtb1
			Lpp	C80913
			Ndufa12	Txnl4a
			Wdr4	Rbm15
			2510002D24Rik	Emc1
			Sfrs18	Lsm3
			Acyp1	Mrpl15
			Dclk1	Pofut1
			Usp40	2010107H07Rik
			B4galnt3	Serp1
			Ccp110	Bpgm
			Nkd2	Aarsd1
			Gng10	Ssbp4
			Habp4	Mars
			Sipa1l1	Arg2
			Cacna1c	Fxyd5
			Zfp428	Pdzd8
			Exosc10	Gm10408
			Gm4636	Pcsk6
			Dimt1	Gm8113
			4933411K16Rik	Hnrnpa3
			Rrp7a	Alg6
			Ecd	Wnk1
			Arl6	Srl
			Naa15	Lamc1
			Slc37a4	Ube2e1
			Eefsec	Mrps2
			Gpr97	Rbbp7
			Gm12922	Mllt11
			RBM4B	Lrdd
			Nfu1	Mrpl47
			Paqr4	Hiat1
			Dlg2	Ddx58
			Mrpl23	Cpsf2
			Cep290	AW146020
			2700062C07Rik	4930529C04Rik
			Vac14	Dzip1l
			Gm8279	Lag3
			Dnajc17	Noa1
			0610009O20Rik	ZFP936
			Ctu2	Taf1d
			Gpr155	Bri3bp
			Ssb	Dhx29
			Adnp	Pop1
			Commd1	Zfp593
			Prepl	Trpc2
			Gusb	Mxd3
			Gm8545	Zdhhc6
			Senp2	Fancg
			Tm7sf2	Thop1
			Gm5069	Pcnp
			Dyrk1a	Tmem30c
			Pds5a	Sdf2l1
			Lrrc24	Ska3
			Ccrn4l	Apmap
			6820431F20Rik	Pcyt2
			Rab23	Hnrnpf
			Tst	Pacsin2
			Hist2h4	1700084J12Rik
			Lman1	Gsto1
			Six5	Adnp2
			Ccdc111	Prc1
			Gpr89	Mug1
			Lrig3	Taf5
			Fntb	Hmgcr
			Gatc	Tpi1
			Gm12109	AC124681.2
			Rgs3	Xpot
			Telo2	Ccdc85b
			Ccdc61	Bccip
			Dnajc24	Rad51l1
			Pomt1	9530077C05Rik
			Fbll1	Atad1
			Rnf7	Psmd12
			Tcf12	Txndc5
			Ptpn2	Clcn2
			Patl1	Praf2
			U6	Phf17
			Rps2-ps5	Peo1
			Cnot10	Ccdc101
			Smyd5	Dzank1
			Galnt2	Krr1
			Ccdc50	Zhx3
			Cep152	Tctn3
			Gm10653	Dym
			Gm13600	Gps1
			Gm4968	1810063B05Rik
			Fancm	D630045J12Rik
			Garnl3	Ccdc138
			Elp4	Twistnb
			Tmem132a	Ubap2
			Pgls	Zdhhc3
			Cnpy1	Tmem11
			Deb1	Myb
			Ggct	Eif1ax
			Wdr18	Gm4340
			Nt5c3l	Strap
			Cfl1	2310057M21Rik
			Srf	Epb4.1l1
			Gm13559	Pdik1l
			Snrpb	Gm13337
			Rragd	Kif11
			Glt8d1	Cenpo
			Hcfc2	Upf3b
			Bag4	Uchl4
			Prrc2a	Tubb4a
			Dll1	2610029G23Rik
			Zfp110	Hmx3
			Guk1	Pfkl
			Ahsa1	Rbmx
			Ostc	Ppp1r14b
			Gm15653	Zfp131
			Rpl14	Setd1a
			Loxl1	Endog
			Gpr87	Cldn7
			Gm17404	Arl6ip6
			Slc43a3	Lsm6
			Scamp3	Ssr1
			Tars2	Smc6
			Pdia5	Smo
			Intu	Lass5
			Lclat1	Hmgb1
			Mapre2	Mrps5
			Elp6	Kif4
			Myadm	Ptcd2
			Moap1	Chsy3
			Elavl1	Baz1b
			BC018507	Pycr2
			Mad2l2	E2f1
			Dnajc10	Dnttip2
			Tssc4	Psmg2
			0610010F05Rik	8430419L09Rik
			Gm13183	Zfp647
			Cep192	Ncln
			Ell3	Ankle1
			G2e3	Zcchc14
			Ndnl2	Aspm
			Rps2	Tomm40
			Pemt	Ept1
			Stpg1	Tcf3
			Hccs	Suz12
			Mup3	Hmgcs1
			Polrmt	Brca1
			Csnk2a1	Pdcd2
			Rnmt	Sap30
			Fopnl	Haus3
			Zfp958	Kif20a
			Slc12a7	Cldn23
			Olfr1387	Txn2
			Cct4	Nudt3
			Pdcd11	Nutf2
			Rtkn2	Atpaf2
			Zfp799	Sssca1
			Dcun1d5	Trim17
			Echs1	Rtel1
			Gm6498	Tmpo
			Ltn1	BC048403
			Sirpb1c	Srek1
			Tdp2	1110038B12Rik
			Galnt12	Clpp
			Olfr1206	Cenpl
			Olfr1271	Plcg1
			Myo1b	Cyb5b
			Cradd	Dek
			Gm9961	Mesdc1
			Mex3d	Epm2aip1
			Mapre1	Tinf2
			Pdzk1	Smarcad1
			Ftsj1	Ccdc64
			Cul5	Snrnp48
			Il4	Fanca
			Tpm1	Sgol2
			Brd7	Hs2st1
			Pigf	Cenpb
			Abl1	Tspyl4
			Hnrnph1	Atm
			Nmd3	Tomm70a
			Lrrn3	Sox9
			Trmt61a	Fhod1
			Tbp	Mcm8
			Pdhx	Lipt1
			Mob1b	Gpr39
			Tceb1	Gm13140
			Sorbs1	Bcdin3d
			Eogt	Hoxa1
			Gm11573	Usp49
			Mars2	Gpatch4
			Rps2-ps4	Uchl3
			2410002O22Rik	Magi3
			Neil3	Fabp12
			Arl6ip1	1810055G02Rik
			Gm12715	Slc38a2
			Ddx59	Atad3a
			Immp2l	Man2a2
			Ppp1cc	Usp24
			Ube2n	Bcor
			Hdac3	Klra6
			Kif27	Wsb2
			Slc25a12	Stil
			Got2	Mif4gd
			Haus2	Rwdd4a
			AC145591.1	Mrpl17
			Egfr	Nmt2
			Thoc6	Pus1
			Ptbp1	Socs5
			Vmn1r239-ps	Eif1ad
			Ing5	Anp32e
			Mettl14	Rai14
			Schip1	Olfr513
			Gm4862	Ccdc88b
			Xpo7	Ddx3x
			Wdr5b	Supt3h
			Lin7b	Nr1h5
			Hmgn3	Nkrf
			Prickle1	Rpl7l1
			Exog	Agap1
			Cep110	Uba2
			Chchd1	Ccdc71l
			Mtrf1l	Shmt2
			Slc22a15	Tmem201
			Akap17b	Larp1
			Traf5	Smarca5-ps
			Abhd10	Gm11620
			FAM48A	CU463325.1
			Mme	Mitd1
			AI480653	Fndc4
			Srpk1	Slmo2
			Ankra2	Kitl
			Ndufb5	Rps24
			Klk1b16	Vps26b
			Olfr1205	1500012F01Rik
			Esrp1	Hdgf
			Gm11658	Ssfa2
			Fam48a	Mvd
			Prpf40a	Sumo3
			Katnb1	Ddx56
			Odf2	Ebna1bp2
			Pepd	Tubb2b
[truncated: 1,020 more rows]
